# Supplementary material for: The Construction of lncRNA/circRNA–miRNA–mRNA Networks Reveals Functional Genes Related to Growth Traits in Schima superba
Source: Int J Mol Sci. 2024 Feb 11;25(4):2171. doi: 10.3390/ijms25042171 (PMC10888550; doi:10.3390/ijms25042171)
Supplement: Supplementary file 1 [file ijms-25-02171-s001.zip › Supplementary Tables.xlsx]

## Sheet: Table S1
Table S1. Basic sequencing information for identifacation of lncRNAs, mRNAs, and circRNAs
Individual	Raw reads	Clean reads	Clean data (Gb)	Error rate (%)	Q20 (%)	Q30 (%)	GC content (%)
SS1	93909468	92979500	13.95	0.03	97.9	93.86	43.81
SS2	98975454	97870662	14.68	0.02	98.15	94.44	43.62
SS3	84500902	83807662	12.57	0.02	98.13	94.36	43.1
SS4	80419836	79647796	11.95	0.02	98.19	94.51	43.27
SS5	95380378	94500886	14.18	0.03	98.04	94.13	42.7
SS6	80105492	79271482	11.89	0.03	98.04	94.12	43.55
SS7	86508684	85561788	12.83	0.02	98.18	94.47	44.21
SS8	99425096	98296508	14.74	0.02	98.21	94.6	44.47
SS9	90831770	89936946	13.49	0.03	98.08	94.25	42.77
SS10	84150322	83266348	12.49	0.02	98.16	94.38	43.54

## Sheet: Table S2
Table S2. Basic sequencing information for identifacation of miRNAs
Individual	Raw reads	Clean reads	Clean data (Gb)	Error rate (%)	Q20 (%)	Q30 (%)	GC content (%)
SS1	12355685	12194327	0.618	0.0001	0.9909	0.9625	0.5094
SS2	11901175	11459816	0.595	0.0001	0.9863	0.949	0.5377
SS3	12523371	12366728	0.626	0.0001	0.9851	0.9456	0.5212
SS4	14543662	14375395	0.727	0.0001	0.996	0.9844	0.5073
SS5	13618808	13273971	0.681	0.0001	0.9962	0.9853	0.5298
SS6	14018117	13890734	0.701	0.0001	0.9943	0.9778	0.5162
SS7	12852940	12560835	0.643	0.0001	0.9871	0.9514	0.5326
SS8	10025196	9927182	0.501	0.0001	0.9863	0.9491	0.5277
SS9	11045627	10944305	0.552	0.0001	0.9944	0.9783	0.5087
SS10	11669686	11438533	0.583	0.0001	0.9864	0.949	0.5288

## Sheet: Table S3
Table S3. Connections in the lncRNA–miRNA–mRNA network using SS1 as control
miRNA	lncRNA/mRNA	Up/Down	Number of detected pairs
aly-miR157d-3p	SS.CHR1.823	up	9
aly-miR157d-3p	SS.CHR10.217	up	8
aly-miR157d-3p	SS.CHR11.2125	up	6
aly-miR157d-3p	SS.CHR15.1616	up	8
aly-miR157d-3p	SS.CHR16.2089	up	7
aly-miR157d-3p	SS.CHR8.317	up	7
aly-miR157d-3p	SS.CHR8.9	up	6
aly-miR157d-3p	TCONS_00003763	up	7
aly-miR157d-3p	TCONS_00003766	up	9
aly-miR157d-3p	TCONS_00016384	up	8
aly-miR157d-3p	TCONS_00046413	up	9
aly-miR157d-3p	TCONS_00050560	up	6
aly-miR157d-3p	TCONS_00061430	up	9
aly-miR157d-3p	TCONS_00133937	up	7
aly-miR157d-3p	TCONS_00133939	up	9
aly-miR157d-3p	TCONS_00147585	up	8
aly-miR157d-3p	TCONS_00172884	up	7
aly-miR172e-3p	SS.CHR1.1569	up	6
aly-miR172e-3p	SS.CHR1.1598	up	8
aly-miR172e-3p	SS.CHR10.2186	up	8
aly-miR172e-3p	SS.CHR11.1189	up	6
aly-miR172e-3p	SS.CHR11.1732	up	8
aly-miR172e-3p	SS.CHR13.1690	up	9
aly-miR172e-3p	SS.CHR13.2324	up	9
aly-miR172e-3p	SS.CHR13.672	up	6
aly-miR172e-3p	SS.CHR14.1157	up	7
aly-miR172e-3p	SS.CHR15.2267	up	6
aly-miR172e-3p	SS.CHR16.2080	up	7
aly-miR172e-3p	SS.CHR18.419	up	6
aly-miR172e-3p	SS.CHR3.1353	up	9
aly-miR172e-3p	SS.CHR3.750	up	7
aly-miR172e-3p	SS.CHR5.760	up	6
aly-miR172e-3p	SS.CHR5.888	up	7
aly-miR172e-3p	SS.CHR6.130	up	9
aly-miR172e-3p	SS.CHR7.2196	up	8
aly-miR172e-3p	TCONS_00005978	up	8
aly-miR172e-3p	TCONS_00010108	up	9
aly-miR172e-3p	TCONS_00011538	up	8
aly-miR172e-3p	TCONS_00016677	up	6
aly-miR172e-3p	TCONS_00020623	up	9
aly-miR172e-3p	TCONS_00025681	up	6
aly-miR172e-3p	TCONS_00027640	up	6
aly-miR172e-3p	TCONS_00030509	up	9
aly-miR172e-3p	TCONS_00036003	up	6
aly-miR172e-3p	TCONS_00038833	up	8
aly-miR172e-3p	TCONS_00042401	up	6
aly-miR172e-3p	TCONS_00048372	up	8
aly-miR172e-3p	TCONS_00050539	up	9
aly-miR172e-3p	TCONS_00050541	up	8
aly-miR172e-3p	TCONS_00050920	up	8
aly-miR172e-3p	TCONS_00071824	up	9
aly-miR172e-3p	TCONS_00082339	up	7
aly-miR172e-3p	TCONS_00089575	up	7
aly-miR172e-3p	TCONS_00092942	up	9
aly-miR172e-3p	TCONS_00092944	up	9
aly-miR172e-3p	TCONS_00101160	up	6
aly-miR172e-3p	TCONS_00111866	up	7
aly-miR172e-3p	TCONS_00121864	up	6
aly-miR172e-3p	TCONS_00124453	up	6
aly-miR172e-3p	TCONS_00125682	up	8
aly-miR172e-3p	TCONS_00137489	up	6
aly-miR172e-3p	TCONS_00141563	up	7
aly-miR172e-3p	TCONS_00147463	up	9
ata-miR395b-3p	SS.CHR1.1244	up	6
ata-miR395b-3p	SS.CHR10.323	up	6
ata-miR395b-3p	SS.CHR11.1814	up	8
ata-miR395b-3p	SS.CHR14.345	up	6
ata-miR395b-3p	SS.CHR14.679	up	7
ata-miR395b-3p	SS.CHR14.812	up	6
ata-miR395b-3p	SS.CHR14.906	up	6
ata-miR395b-3p	SS.CHR15.1230	up	6
ata-miR395b-3p	SS.CHR16.615	up	6
ata-miR395b-3p	SS.CHR16.934	up	7
ata-miR395b-3p	SS.CHR17.1527	up	6
ata-miR395b-3p	SS.CHR17.2126	up	8
ata-miR395b-3p	SS.CHR18.1979	up	6
ata-miR395b-3p	SS.CHR18.2163	up	8
ata-miR395b-3p	SS.CHR18.927	up	6
ata-miR395b-3p	SS.CHR3.1464	up	7
ata-miR395b-3p	SS.CHR4.1342	up	6
ata-miR395b-3p	SS.CHR6.1177	up	7
ata-miR395b-3p	SS.CHR6.1306	up	8
ata-miR395b-3p	SS.CHR8.1071	up	7
ata-miR395b-3p	SS.CHR8.1078	up	6
ata-miR395b-3p	SS.CHR8.1946	up	8
ata-miR395b-3p	SS.CHR9.75	up	8
ata-miR395b-3p	SS.CHR9.914	up	7
ata-miR395b-3p	TCONS_00006934	up	7
ata-miR395b-3p	TCONS_00010071	up	7
ata-miR395b-3p	TCONS_00016146	up	8
ata-miR395b-3p	TCONS_00016474	up	6
ata-miR395b-3p	TCONS_00016912	up	8
ata-miR395b-3p	TCONS_00017553	up	8
ata-miR395b-3p	TCONS_00017576	up	6
ata-miR395b-3p	TCONS_00017577	up	7
ata-miR395b-3p	TCONS_00025347	up	6
ata-miR395b-3p	TCONS_00027124	up	8
ata-miR395b-3p	TCONS_00030564	up	7
ata-miR395b-3p	TCONS_00036765	up	8
ata-miR395b-3p	TCONS_00041540	up	6
ata-miR395b-3p	TCONS_00041628	up	7
ata-miR395b-3p	TCONS_00041629	up	8
ata-miR395b-3p	TCONS_00041630	up	7
ata-miR395b-3p	TCONS_00044110	up	8
ata-miR395b-3p	TCONS_00051357	up	7
ata-miR395b-3p	TCONS_00051751	up	6
ata-miR395b-3p	TCONS_00055029	up	7
ata-miR395b-3p	TCONS_00056994	up	8
ata-miR395b-3p	TCONS_00060226	up	8
ata-miR395b-3p	TCONS_00060488	up	8
ata-miR395b-3p	TCONS_00062956	up	6
ata-miR395b-3p	TCONS_00065335	up	8
ata-miR395b-3p	TCONS_00072141	up	7
ata-miR395b-3p	TCONS_00074070	up	7
ata-miR395b-3p	TCONS_00075503	up	7
ata-miR395b-3p	TCONS_00078175	up	6
ata-miR395b-3p	TCONS_00078296	up	6
ata-miR395b-3p	TCONS_00078609	up	6
ata-miR395b-3p	TCONS_00078968	up	7
ata-miR395b-3p	TCONS_00079926	up	6
ata-miR395b-3p	TCONS_00086520	up	7
ata-miR395b-3p	TCONS_00087850	up	6
ata-miR395b-3p	TCONS_00091426	up	8
ata-miR395b-3p	TCONS_00091919	up	7
ata-miR395b-3p	TCONS_00092916	up	8
ata-miR395b-3p	TCONS_00097474	up	8
ata-miR395b-3p	TCONS_00098047	up	7
ata-miR395b-3p	TCONS_00098306	up	6
ata-miR395b-3p	TCONS_00100439	up	8
ata-miR395b-3p	TCONS_00106556	up	7
ata-miR395b-3p	TCONS_00126240	up	7
ata-miR395b-3p	TCONS_00126315	up	6
ata-miR395b-3p	TCONS_00127802	up	8
ata-miR395b-3p	TCONS_00132952	up	8
ata-miR395b-3p	TCONS_00133582	up	7
ata-miR395b-3p	TCONS_00137221	up	8
ata-miR395b-3p	TCONS_00140501	up	8
ata-miR395b-3p	TCONS_00141447	up	6
ata-miR395b-3p	TCONS_00156727	up	7
ata-miR395b-3p	TCONS_00158330	up	6
ata-miR395b-3p	TCONS_00163139	up	7
ata-miR395b-3p	TCONS_00164938	up	7
ata-miR395b-3p	TCONS_00166117	up	7
ata-miR395b-3p	TCONS_00166784	up	7
ata-miR395b-3p	TCONS_00168251	up	6
ata-miR395b-3p	TCONS_00173619	up	8
ata-miR395b-3p	TCONS_00174394	up	6
ath-miR156a-5p	SS.CHR1.1216	up	7
ath-miR156a-5p	SS.CHR1.867	up	6
ath-miR156a-5p	SS.CHR10.1178	up	9
ath-miR156a-5p	SS.CHR10.1359	up	9
ath-miR156a-5p	SS.CHR10.1718	up	6
ath-miR156a-5p	SS.CHR11.2041	up	6
ath-miR156a-5p	SS.CHR11.454	up	8
ath-miR156a-5p	SS.CHR12.1224	up	6
ath-miR156a-5p	SS.CHR12.338	up	9
ath-miR156a-5p	SS.CHR13.2591	up	6
ath-miR156a-5p	SS.CHR14.1190	up	9
ath-miR156a-5p	SS.CHR14.2495	up	6
ath-miR156a-5p	SS.CHR17.804	up	9
ath-miR156a-5p	SS.CHR5.1173	up	8
ath-miR156a-5p	SS.CHR7.1320	up	9
ath-miR156a-5p	SS.CHR7.1681	up	7
ath-miR156a-5p	SS.CHR8.959	up	6
ath-miR156a-5p	SS.CHR9.42	up	6
ath-miR156a-5p	TCONS_00019674	up	7
ath-miR156a-5p	TCONS_00023562	up	6
ath-miR156a-5p	TCONS_00030636	up	8
ath-miR156a-5p	TCONS_00031378	up	7
ath-miR156a-5p	TCONS_00046920	up	9
ath-miR156a-5p	TCONS_00054871	up	8
ath-miR156a-5p	TCONS_00054874	up	7
ath-miR156a-5p	TCONS_00055825	up	6
ath-miR156a-5p	TCONS_00060287	up	9
ath-miR156a-5p	TCONS_00067381	up	6
ath-miR156a-5p	TCONS_00070157	up	9
ath-miR156a-5p	TCONS_00071637	up	8
ath-miR156a-5p	TCONS_00076397	up	6
ath-miR156a-5p	TCONS_00078442	up	9
ath-miR156a-5p	TCONS_00084359	up	9
ath-miR156a-5p	TCONS_00086098	up	7
ath-miR156a-5p	TCONS_00086341	up	9
ath-miR156a-5p	TCONS_00096734	up	8
ath-miR156a-5p	TCONS_00097328	up	9
ath-miR156a-5p	TCONS_00125705	up	8
ath-miR156a-5p	TCONS_00126289	up	6
ath-miR156a-5p	TCONS_00126290	up	7
ath-miR156a-5p	TCONS_00138519	up	9
ath-miR156a-5p	TCONS_00141129	up	7
ath-miR156a-5p	TCONS_00141936	up	7
ath-miR156a-5p	TCONS_00159940	up	7
ath-miR156a-5p	TCONS_00160979	up	9
ath-miR156a-5p	TCONS_00169412	up	9
ath-miR156a-5p	TCONS_00171685	up	6
ath-miR156a-5p	TCONS_00171961	up	6
ath-miR156a-5p	TCONS_00175727	up	8
bdi-miR159a-3p	SS.CHR11.1980	up	9
bdi-miR159a-3p	SS.CHR15.1343	up	8
bdi-miR159a-3p	SS.CHR15.608	up	8
bdi-miR159a-3p	SS.CHR16.1184	up	6
bdi-miR159a-3p	SS.CHR16.1440	up	9
bdi-miR159a-3p	SS.CHR17.2468	up	6
bdi-miR159a-3p	SS.CHR18.1911	up	7
bdi-miR159a-3p	SS.CHR18.2056	up	6
bdi-miR159a-3p	SS.CHR18.2163	up	8
bdi-miR159a-3p	SS.CHR18.266	up	6
bdi-miR159a-3p	SS.CHR2.1585	up	8
bdi-miR159a-3p	SS.CHR2.68	up	6
bdi-miR159a-3p	SS.CHR7.1289	up	8
bdi-miR159a-3p	SS.CHR8.973	up	7
bdi-miR159a-3p	TCONS_00000695	up	8
bdi-miR159a-3p	TCONS_00008883	up	7
bdi-miR159a-3p	TCONS_00018291	up	9
bdi-miR159a-3p	TCONS_00020409	up	7
bdi-miR159a-3p	TCONS_00020410	up	6
bdi-miR159a-3p	TCONS_00062143	up	6
bdi-miR159a-3p	TCONS_00085873	up	6
bdi-miR159a-3p	TCONS_00089832	up	6
bdi-miR159a-3p	TCONS_00091274	up	9
bdi-miR159a-3p	TCONS_00093942	up	8
bdi-miR159a-3p	TCONS_00096460	up	9
bdi-miR159a-3p	TCONS_00096466	up	9
bdi-miR159a-3p	TCONS_00105212	up	7
bdi-miR159a-3p	TCONS_00126756	up	6
bdi-miR159a-3p	TCONS_00127143	up	7
bdi-miR159a-3p	TCONS_00141936	up	7
bdi-miR159a-3p	TCONS_00154792	up	8
bdi-miR159a-3p	TCONS_00158941	up	9
bdi-miR159a-3p	TCONS_00174372	up	6
fve-miR156h	SS.CHR1.867	up	6
fve-miR156h	SS.CHR10.1718	up	6
fve-miR156h	SS.CHR10.2407_SS.CHR10.2415	up	7
fve-miR156h	SS.CHR11.454	up	8
fve-miR156h	SS.CHR11.866	up	6
fve-miR156h	SS.CHR12.1431	up	6
fve-miR156h	SS.CHR14.1190	up	9
fve-miR156h	SS.CHR14.1456	up	9
fve-miR156h	SS.CHR14.1542	up	6
fve-miR156h	SS.CHR14.2005	up	7
fve-miR156h	SS.CHR14.2495	up	6
fve-miR156h	SS.CHR16.934	up	8
fve-miR156h	SS.CHR18.512	up	6
fve-miR156h	SS.CHR2.657	up	9
fve-miR156h	SS.CHR4.689	up	7
fve-miR156h	SS.CHR5.1173	up	8
fve-miR156h	SS.CHR9.2047	up	7
fve-miR156h	SS.CHR9.573	up	6
fve-miR156h	TCONS_00009507	up	6
fve-miR156h	TCONS_00014594	up	8
fve-miR156h	TCONS_00016200	up	7
fve-miR156h	TCONS_00019711	up	7
fve-miR156h	TCONS_00023562	up	6
fve-miR156h	TCONS_00030178	up	6
fve-miR156h	TCONS_00041628	up	8
fve-miR156h	TCONS_00069645	up	7
fve-miR156h	TCONS_00070157	up	9
fve-miR156h	TCONS_00084359	up	9
fve-miR156h	TCONS_00086098	up	7
fve-miR156h	TCONS_00091183	up	6
fve-miR156h	TCONS_00096734	up	8
fve-miR156h	TCONS_00097328	up	9
fve-miR156h	TCONS_00103705	up	8
fve-miR156h	TCONS_00105396	up	6
fve-miR156h	TCONS_00119139	up	8
fve-miR156h	TCONS_00125705	up	8
fve-miR156h	TCONS_00125758	up	8
fve-miR156h	TCONS_00126601	up	8
fve-miR156h	TCONS_00131091	up	9
fve-miR156h	TCONS_00146449	up	7
fve-miR156h	TCONS_00147606	up	8
fve-miR156h	TCONS_00148008	up	9
fve-miR156h	TCONS_00159938	up	6
fve-miR156h	TCONS_00159940	up	7
fve-miR156h	TCONS_00168706	up	8
fve-miR156h	TCONS_00168710	up	6
fve-miR156h	TCONS_00168713	up	7
fve-miR156h	TCONS_00171961	up	6
gma-miR172b-5p	SS.CHR1.438	up	8
gma-miR172b-5p	SS.CHR1.93	up	8
gma-miR172b-5p	SS.CHR11.1368	up	6
gma-miR172b-5p	SS.CHR11.2191	up	6
gma-miR172b-5p	SS.CHR11.921	up	7
gma-miR172b-5p	SS.CHR14.2364	up	8
gma-miR172b-5p	SS.CHR16.1391	up	7
gma-miR172b-5p	SS.CHR18.1455	up	7
gma-miR172b-5p	SS.CHR2.1843	up	6
gma-miR172b-5p	SS.CHR3.701	up	8
gma-miR172b-5p	SS.CHR4.1071	up	6
gma-miR172b-5p	SS.CHR4.357	up	6
gma-miR172b-5p	SS.CHR4.4	up	7
gma-miR172b-5p	SS.CHR5.1022	up	8
gma-miR172b-5p	SS.CHR5.1023	up	8
gma-miR172b-5p	SS.CHR5.1026	up	8
gma-miR172b-5p	SS.CHR5.1586	up	7
gma-miR172b-5p	SS.CHR5.965	up	6
gma-miR172b-5p	SS.CHR6.402	up	6
gma-miR172b-5p	SS.CHR7.1177	up	6
gma-miR172b-5p	SS.CHR8.1871	up	6
gma-miR172b-5p	SS.CHR8.563	up	6
gma-miR172b-5p	SS.CHR9.556	up	6
gma-miR172b-5p	SS.CHR9.764	up	6
gma-miR172b-5p	TCONS_00004331	up	8
gma-miR172b-5p	TCONS_00011552	up	6
gma-miR172b-5p	TCONS_00017578	up	8
gma-miR172b-5p	TCONS_00018103	up	8
gma-miR172b-5p	TCONS_00035191	up	6
gma-miR172b-5p	TCONS_00039127	up	7
gma-miR172b-5p	TCONS_00054871	up	7
gma-miR172b-5p	TCONS_00054874	up	7
gma-miR172b-5p	TCONS_00058288	up	6
gma-miR172b-5p	TCONS_00058289	up	8
gma-miR172b-5p	TCONS_00058290	up	8
gma-miR172b-5p	TCONS_00072210	up	6
gma-miR172b-5p	TCONS_00092548	up	6
gma-miR172b-5p	TCONS_00121864	up	6
gma-miR172b-5p	TCONS_00125086	up	7
gma-miR172b-5p	TCONS_00125087	up	7
gma-miR172b-5p	TCONS_00153247	up	8
gma-miR172b-5p	TCONS_00159871	up	7
gma-miR172b-5p	TCONS_00170123	up	6
gma-miR396a-3p	SS.CHR10.1041	up	6
gma-miR396a-3p	SS.CHR11.2034	up	6
gma-miR396a-3p	SS.CHR11.969	up	8
gma-miR396a-3p	SS.CHR12.619	up	6
gma-miR396a-3p	SS.CHR13.179	up	6
gma-miR396a-3p	SS.CHR14.2364	up	9
gma-miR396a-3p	SS.CHR17.165	up	7
gma-miR396a-3p	SS.CHR2.1840	up	8
gma-miR396a-3p	SS.CHR7.1909	up	8
gma-miR396a-3p	SS.CHR9.212	up	6
gma-miR396a-3p	TCONS_00004185	up	8
gma-miR396a-3p	TCONS_00013577	up	7
gma-miR396a-3p	TCONS_00016392	up	9
gma-miR396a-3p	TCONS_00017666	up	8
gma-miR396a-3p	TCONS_00021405	up	9
gma-miR396a-3p	TCONS_00022505	up	9
gma-miR396a-3p	TCONS_00024209	up	6
gma-miR396a-3p	TCONS_00029894	up	6
gma-miR396a-3p	TCONS_00039127	up	8
gma-miR396a-3p	TCONS_00041953	up	8
gma-miR396a-3p	TCONS_00046013	up	8
gma-miR396a-3p	TCONS_00054140	up	7
gma-miR396a-3p	TCONS_00058939	up	7
gma-miR396a-3p	TCONS_00058940	up	7
gma-miR396a-3p	TCONS_00063787	up	8
gma-miR396a-3p	TCONS_00071572	up	8
gma-miR396a-3p	TCONS_00075047	up	7
gma-miR396a-3p	TCONS_00077637	up	6
gma-miR396a-3p	TCONS_00122604	up	9
gma-miR396a-3p	TCONS_00122605	up	9
gma-miR396a-3p	TCONS_00122607	up	8
gma-miR396a-3p	TCONS_00122608	up	8
gma-miR396a-3p	TCONS_00126255	up	7
gma-miR396a-3p	TCONS_00145923	up	6
gma-miR396a-3p	TCONS_00147585	up	8
gma-miR396a-3p	TCONS_00149027	up	8
gma-miR396a-3p	TCONS_00154057	up	8
gma-miR396a-3p	TCONS_00159936	up	7
gma-miR396a-3p	TCONS_00159938	up	6
gma-miR396a-3p	TCONS_00159940	up	7
gma-miR396a-3p	TCONS_00162520	up	6
gma-miR396a-3p	TCONS_00165266	up	6
gma-miR396a-3p	TCONS_00168065	up	9
gma-miR396a-3p	TCONS_00168066	up	7
gma-miR396a-3p	TCONS_00168067	up	6
gma-miR396a-3p	TCONS_00170124	up	6
gma-miR396a-3p	TCONS_00171455	up	8
gma-miR396a-3p	TCONS_00173740	up	7
gma-miR6300	SS.CHR10.2055	up	7
gma-miR6300	SS.CHR11.327	up	6
gma-miR6300	SS.CHR12.1543	up	7
gma-miR6300	SS.CHR12.27	up	7
gma-miR6300	SS.CHR13.1955	up	7
gma-miR6300	SS.CHR13.2168	up	6
gma-miR6300	SS.CHR13.64	up	6
gma-miR6300	SS.CHR14.1122	up	6
gma-miR6300	SS.CHR15.347	up	6
gma-miR6300	SS.CHR16.2285	up	7
gma-miR6300	SS.CHR17.1100	up	6
gma-miR6300	SS.CHR3.1273	up	7
gma-miR6300	SS.CHR5.1148	up	7
gma-miR6300	SS.CHR9.1213	up	7
gma-miR6300	SS.CHR9.1532	up	6
gma-miR6300	TCONS_00020081	up	7
gma-miR6300	TCONS_00033978	up	6
gma-miR6300	TCONS_00034997	up	6
gma-miR6300	TCONS_00039756	up	6
gma-miR6300	TCONS_00058133	up	7
gma-miR6300	TCONS_00060000	up	6
gma-miR6300	TCONS_00063963	up	7
gma-miR6300	TCONS_00069450	up	6
gma-miR6300	TCONS_00084655	up	6
gma-miR6300	TCONS_00085828	up	6
gma-miR6300	TCONS_00086327	up	6
gma-miR6300	TCONS_00098137	up	7
gma-miR6300	TCONS_00099985	up	6
gma-miR6300	TCONS_00118148	up	7
gma-miR6300	TCONS_00119843	up	7
gma-miR6300	TCONS_00120255	up	6
gma-miR6300	TCONS_00122697	up	6
gma-miR6300	TCONS_00136490	up	7
gma-miR6300	TCONS_00137970	up	7
gma-miR6300	TCONS_00138519	up	7
gma-miR6300	TCONS_00145438	up	7
gma-miR6300	TCONS_00160981	up	7
gma-miR6300	TCONS_00164119	up	6
gma-miR6300	TCONS_00165784	up	6
gma-miR6300	TCONS_00168251	up	6
hbr-miR156	SS.CHR1.32	up	9
hbr-miR156	SS.CHR1.867	up	6
hbr-miR156	SS.CHR10.1401	up	7
hbr-miR156	SS.CHR10.1718	up	6
hbr-miR156	SS.CHR10.2094	up	8
hbr-miR156	SS.CHR11.2034	up	6
hbr-miR156	SS.CHR11.2102	up	6
hbr-miR156	SS.CHR11.454	up	8
hbr-miR156	SS.CHR11.734	up	6
hbr-miR156	SS.CHR11.866	up	6
hbr-miR156	SS.CHR13.1269	up	9
hbr-miR156	SS.CHR14.1190	up	9
hbr-miR156	SS.CHR14.806	up	9
hbr-miR156	SS.CHR15.124	up	7
hbr-miR156	SS.CHR15.1614	up	6
hbr-miR156	SS.CHR15.1645	up	8
hbr-miR156	SS.CHR3.1160	up	7
hbr-miR156	SS.CHR3.1338	up	9
hbr-miR156	SS.CHR3.349	up	7
hbr-miR156	SS.CHR4.233	up	7
hbr-miR156	SS.CHR4.236	up	9
hbr-miR156	SS.CHR4.330	up	8
hbr-miR156	SS.CHR5.1173	up	8
hbr-miR156	SS.CHR5.1687	up	7
hbr-miR156	SS.CHR6.69	up	9
hbr-miR156	SS.CHR6.72_SS.CHR6.74	up	8
hbr-miR156	SS.CHR7.1813	up	9
hbr-miR156	SS.CHR7.402	up	6
hbr-miR156	SS.CHR8.1277	up	7
hbr-miR156	SS.CHR8.802	up	6
hbr-miR156	SS.CHR9.1495	up	6
hbr-miR156	SS.CHR9.1573	up	8
hbr-miR156	SS.CHR9.573	up	6
hbr-miR156	TCONS_00000692	up	9
hbr-miR156	TCONS_00000695	up	8
hbr-miR156	TCONS_00002518	up	6
hbr-miR156	TCONS_00004325	up	7
hbr-miR156	TCONS_00006067	up	8
hbr-miR156	TCONS_00009859	up	6
hbr-miR156	TCONS_00015941	up	8
hbr-miR156	TCONS_00018045	up	8
hbr-miR156	TCONS_00019711	up	7
hbr-miR156	TCONS_00020611	up	6
hbr-miR156	TCONS_00027793	up	9
hbr-miR156	TCONS_00031289	up	7
hbr-miR156	TCONS_00036391	up	6
hbr-miR156	TCONS_00036589	up	7
hbr-miR156	TCONS_00040970	up	8
hbr-miR156	TCONS_00043317	up	8
hbr-miR156	TCONS_00047347	up	8
hbr-miR156	TCONS_00047348	up	8
hbr-miR156	TCONS_00050545	up	9
hbr-miR156	TCONS_00050555	up	7
hbr-miR156	TCONS_00051714	up	7
hbr-miR156	TCONS_00056398	up	6
hbr-miR156	TCONS_00061631	up	9
hbr-miR156	TCONS_00063826	up	9
hbr-miR156	TCONS_00065552	up	8
hbr-miR156	TCONS_00071648	up	7
hbr-miR156	TCONS_00072323	up	8
hbr-miR156	TCONS_00074588	up	6
hbr-miR156	TCONS_00077554	up	7
hbr-miR156	TCONS_00079926	up	7
hbr-miR156	TCONS_00082339	up	7
hbr-miR156	TCONS_00083935	up	8
hbr-miR156	TCONS_00084359	up	9
hbr-miR156	TCONS_00086950	up	7
hbr-miR156	TCONS_00091183	up	6
hbr-miR156	TCONS_00096734	up	8
hbr-miR156	TCONS_00096988	up	9
hbr-miR156	TCONS_00098938	up	6
hbr-miR156	TCONS_00104683	up	8
hbr-miR156	TCONS_00111609	up	6
hbr-miR156	TCONS_00111866	up	7
hbr-miR156	TCONS_00115210	up	7
hbr-miR156	TCONS_00119424	up	8
hbr-miR156	TCONS_00119426	up	6
hbr-miR156	TCONS_00119427	up	6
hbr-miR156	TCONS_00120255	up	6
hbr-miR156	TCONS_00125085	up	8
hbr-miR156	TCONS_00126829	up	9
hbr-miR156	TCONS_00127538	up	6
hbr-miR156	TCONS_00129997	up	7
hbr-miR156	TCONS_00137319	up	9
hbr-miR156	TCONS_00137656	up	6
hbr-miR156	TCONS_00142907	up	6
hbr-miR156	TCONS_00157225	up	7
hbr-miR156	TCONS_00162012	up	6
hbr-miR156	TCONS_00165031	up	6
hbr-miR156	TCONS_00166579	up	6
hbr-miR156	TCONS_00168068	up	6
hbr-miR156	TCONS_00168705	up	7
hbr-miR156	TCONS_00168706	up	8
hbr-miR156	TCONS_00168710	up	6
hbr-miR156	TCONS_00168713	up	7
hbr-miR156	TCONS_00171685	up	6
hbr-miR156	TCONS_00173791	up	9
novel_102	SS.CHR11.187	up	7
novel_102	SS.CHR12.815	up	8
novel_102	SS.CHR13.898	up	8
novel_102	SS.CHR14.2200	up	6
novel_102	SS.CHR16.2065	up	6
novel_102	SS.CHR16.797	up	8
novel_102	SS.CHR18.1118	up	6
novel_102	SS.CHR5.409	up	6
novel_102	SS.CHR6.274	up	8
novel_102	SS.CHR8.1789	up	8
novel_102	TCONS_00013577	up	6
novel_102	TCONS_00015671	up	8
novel_102	TCONS_00016639	up	6
novel_102	TCONS_00019711	up	6
novel_102	TCONS_00024209	up	6
novel_102	TCONS_00024291	up	6
novel_102	TCONS_00031024	up	7
novel_102	TCONS_00035191	up	6
novel_102	TCONS_00035200	up	6
novel_102	TCONS_00035203	up	6
novel_102	TCONS_00035206	up	7
novel_102	TCONS_00036589	up	6
novel_102	TCONS_00037225	up	7
novel_102	TCONS_00039044	up	8
novel_102	TCONS_00040234	up	8
novel_102	TCONS_00040236	up	7
novel_102	TCONS_00041420	up	8
novel_102	TCONS_00042392	up	6
novel_102	TCONS_00042492	up	7
novel_102	TCONS_00044049	up	7
novel_102	TCONS_00045014	up	7
novel_102	TCONS_00049783	up	6
novel_102	TCONS_00049786	up	6
novel_102	TCONS_00070029	up	6
novel_102	TCONS_00078442	up	8
novel_102	TCONS_00096734	up	7
novel_102	TCONS_00100194	up	6
novel_102	TCONS_00103891	up	7
novel_102	TCONS_00106369	up	8
novel_102	TCONS_00121175	up	7
novel_102	TCONS_00125638	up	6
novel_102	TCONS_00126761	up	6
novel_102	TCONS_00128019	up	7
novel_102	TCONS_00128020	up	8
novel_102	TCONS_00128409	up	7
novel_102	TCONS_00130788	up	6
novel_102	TCONS_00131550	up	7
novel_102	TCONS_00133626	up	8
novel_102	TCONS_00142319	up	7
novel_102	TCONS_00144916	up	6
novel_102	TCONS_00145433	up	8
novel_102	TCONS_00150230	up	6
novel_102	TCONS_00160719	up	7
novel_102	TCONS_00163643	up	6
novel_102	TCONS_00168704	up	7
novel_102	TCONS_00168705	up	6
novel_102	TCONS_00168706	up	7
novel_102	TCONS_00168708	up	7
novel_102	TCONS_00168709	up	7
novel_102	TCONS_00168713	up	6
novel_102	TCONS_00168714	up	6
novel_102	TCONS_00172277	up	6
novel_102	TCONS_00177161	up	7
osa-miR396a-3p	SS.CHR11.969	up	7
osa-miR396a-3p	SS.CHR14.1456	up	8
osa-miR396a-3p	SS.CHR14.2364	up	8
osa-miR396a-3p	SS.CHR2.1840	up	7
osa-miR396a-3p	SS.CHR3.1535	up	7
osa-miR396a-3p	SS.CHR3.712	up	8
osa-miR396a-3p	SS.CHR4.244	up	7
osa-miR396a-3p	SS.CHR4.250	up	7
osa-miR396a-3p	SS.CHR9.1863	up	8
osa-miR396a-3p	TCONS_00004185	up	7
osa-miR396a-3p	TCONS_00016645	up	7
osa-miR396a-3p	TCONS_00016646	up	7
osa-miR396a-3p	TCONS_00016647	up	7
osa-miR396a-3p	TCONS_00021405	up	8
osa-miR396a-3p	TCONS_00022505	up	8
osa-miR396a-3p	TCONS_00024209	up	6
osa-miR396a-3p	TCONS_00039127	up	7
osa-miR396a-3p	TCONS_00041953	up	7
osa-miR396a-3p	TCONS_00058939	up	6
osa-miR396a-3p	TCONS_00058940	up	6
osa-miR396a-3p	TCONS_00063787	up	7
osa-miR396a-3p	TCONS_00071572	up	7
osa-miR396a-3p	TCONS_00075047	up	6
osa-miR396a-3p	TCONS_00077637	up	6
osa-miR396a-3p	TCONS_00122604	up	8
osa-miR396a-3p	TCONS_00122605	up	8
osa-miR396a-3p	TCONS_00122607	up	7
osa-miR396a-3p	TCONS_00122608	up	7
osa-miR396a-3p	TCONS_00126255	up	6
osa-miR396a-3p	TCONS_00145923	up	6
osa-miR396a-3p	TCONS_00147585	up	7
osa-miR396a-3p	TCONS_00149027	up	7
osa-miR396a-3p	TCONS_00154057	up	6
osa-miR396a-3p	TCONS_00165266	up	6
osa-miR396a-3p	TCONS_00167321	up	6
osa-miR396a-3p	TCONS_00168065	up	8
osa-miR396a-3p	TCONS_00168066	up	6
osa-miR396a-3p	TCONS_00171455	up	7
osa-miR5083	SS.CHR1.1216	up	6
osa-miR5083	SS.CHR10.2211	up	6
osa-miR5083	SS.CHR10.654	up	8
osa-miR5083	SS.CHR8.1946	up	7
osa-miR5083	SS.CHR9.1423	up	6
osa-miR5083	SS.CHR9.1819	up	7
osa-miR5083	TCONS_00007980	up	6
osa-miR5083	TCONS_00016385	up	8
osa-miR5083	TCONS_00016835	up	7
osa-miR5083	TCONS_00016841	up	8
osa-miR5083	TCONS_00016842	up	8
osa-miR5083	TCONS_00018404	up	6
osa-miR5083	TCONS_00030624	up	8
osa-miR5083	TCONS_00030626	up	7
osa-miR5083	TCONS_00035606	up	6
osa-miR5083	TCONS_00036348	up	7
osa-miR5083	TCONS_00065946	up	7
osa-miR5083	TCONS_00073898	up	6
osa-miR5083	TCONS_00078845	up	7
osa-miR5083	TCONS_00096987	up	8
osa-miR5083	TCONS_00113475	up	6
osa-miR5083	TCONS_00116425	up	6
osa-miR5083	TCONS_00135286	up	8
osa-miR5083	TCONS_00143622	up	8
osa-miR5083	TCONS_00147585	up	7
osa-miR5083	TCONS_00160919	up	8
osa-miR5083	TCONS_00165125	up	6
osa-miR5083	TCONS_00165764	up	8
pab-miR156b	SS.CHR10.1178	up	8
pab-miR156b	SS.CHR10.589	up	6
pab-miR156b	SS.CHR11.454	up	7
pab-miR156b	SS.CHR12.338	up	8
pab-miR156b	SS.CHR14.1190	up	8
pab-miR156b	SS.CHR17.804	up	8
pab-miR156b	SS.CHR3.657	up	8
pab-miR156b	SS.CHR5.1173	up	7
pab-miR156b	SS.CHR7.125	up	6
pab-miR156b	SS.CHR8.43	up	6
pab-miR156b	SS.CHR8.959	up	6
pab-miR156b	SS.CHR9.42	up	6
pab-miR156b	TCONS_00027793	up	8
pab-miR156b	TCONS_00042016	up	8
pab-miR156b	TCONS_00046920	up	8
pab-miR156b	TCONS_00050555	up	6
pab-miR156b	TCONS_00063787	up	7
pab-miR156b	TCONS_00070157	up	8
pab-miR156b	TCONS_00078442	up	8
pab-miR156b	TCONS_00085899	up	8
pab-miR156b	TCONS_00086098	up	7
pab-miR156b	TCONS_00096734	up	7
pab-miR156b	TCONS_00125705	up	7
pab-miR156b	TCONS_00126290	up	6
pab-miR156b	TCONS_00132888	up	6
pab-miR156b	TCONS_00136131	up	6
pab-miR156b	TCONS_00141936	up	6
pab-miR156b	TCONS_00146167	up	6
pab-miR156b	TCONS_00148996	up	7
pab-miR156b	TCONS_00171685	up	6
pab-miR156b	TCONS_00175727	up	7
pta-miR319	SS.CHR10.2174	up	7
pta-miR319	SS.CHR12.1605	up	8
pta-miR319	SS.CHR13.1553	up	7
pta-miR319	SS.CHR13.185	up	7
pta-miR319	SS.CHR13.811	up	8
pta-miR319	SS.CHR16.1779	up	9
pta-miR319	SS.CHR18.1308	up	7
pta-miR319	SS.CHR18.1501	up	9
pta-miR319	SS.CHR18.2056	up	6
pta-miR319	SS.CHR5.402	up	8
pta-miR319	SS.CHR6.1218	up	8
pta-miR319	SS.CHR6.444	up	6
pta-miR319	SS.CHR7.1289	up	8
pta-miR319	TCONS_00041630	up	8
pta-miR319	TCONS_00047347	up	8
pta-miR319	TCONS_00047348	up	8
pta-miR319	TCONS_00049201	up	9
pta-miR319	TCONS_00050535	up	6
pta-miR319	TCONS_00054748	up	6
pta-miR319	TCONS_00061768	up	9
pta-miR319	TCONS_00086342	up	9
pta-miR319	TCONS_00087881	up	6
pta-miR319	TCONS_00091919	up	7
pta-miR319	TCONS_00095497	up	7
pta-miR319	TCONS_00097081	up	6
pta-miR319	TCONS_00099270	up	9
pta-miR319	TCONS_00107687	up	7
pta-miR319	TCONS_00122263	up	9
pta-miR319	TCONS_00122856	up	7
pta-miR319	TCONS_00127995	up	7
pta-miR319	TCONS_00130448	up	6
pta-miR319	TCONS_00141936	up	7
pta-miR319	TCONS_00152522	up	7
pta-miR319	TCONS_00154950	up	6
pta-miR319	TCONS_00163643	up	6
rgl-miR5139	SS.CHR10.1680	up	8
rgl-miR5139	SS.CHR11.1745	up	6
rgl-miR5139	SS.CHR11.2198	up	6
rgl-miR5139	SS.CHR13.1651	up	7
rgl-miR5139	SS.CHR13.2566	up	6
rgl-miR5139	SS.CHR13.884	up	8
rgl-miR5139	SS.CHR14.1929	up	9
rgl-miR5139	SS.CHR14.679	up	8
rgl-miR5139	SS.CHR17.109	up	6
rgl-miR5139	SS.CHR17.379	up	8
rgl-miR5139	SS.CHR18.2140	up	9
rgl-miR5139	SS.CHR7.1054	up	7
rgl-miR5139	TCONS_00000647	up	8
rgl-miR5139	TCONS_00008612	up	6
rgl-miR5139	TCONS_00010757	up	8
rgl-miR5139	TCONS_00011228	up	8
rgl-miR5139	TCONS_00029474	up	9
rgl-miR5139	TCONS_00034262	up	7
rgl-miR5139	TCONS_00052073	up	8
rgl-miR5139	TCONS_00069823	up	8
rgl-miR5139	TCONS_00071370	up	8
rgl-miR5139	TCONS_00109759	up	7
rgl-miR5139	TCONS_00117453	up	6
rgl-miR5139	TCONS_00125359	up	6
rgl-miR5139	TCONS_00125589	up	7
rgl-miR5139	TCONS_00135286	up	9
rgl-miR5139	TCONS_00138519	up	9
rgl-miR5139	TCONS_00141181	up	7
rgl-miR5139	TCONS_00148104	up	8
rgl-miR5139	TCONS_00155373	up	7
rgl-miR5139	TCONS_00174515	up	9
sbi-miR172b	SS.CHR1.1598	up	8
sbi-miR172b	SS.CHR10.2211	up	6
sbi-miR172b	SS.CHR11.1732	up	8
sbi-miR172b	SS.CHR11.541	up	7
sbi-miR172b	SS.CHR13.1690	up	9
sbi-miR172b	SS.CHR13.2324	up	9
sbi-miR172b	SS.CHR13.672	up	6
sbi-miR172b	SS.CHR15.313	up	6
sbi-miR172b	SS.CHR16.2054	up	7
sbi-miR172b	SS.CHR16.2080	up	7
sbi-miR172b	SS.CHR16.847	up	8
sbi-miR172b	SS.CHR17.1469	up	8
sbi-miR172b	SS.CHR4.1301	up	7
sbi-miR172b	SS.CHR5.888	up	7
sbi-miR172b	SS.CHR6.130	up	9
sbi-miR172b	TCONS_00002799	up	8
sbi-miR172b	TCONS_00020623	up	9
sbi-miR172b	TCONS_00027640	up	6
sbi-miR172b	TCONS_00029466	up	8
sbi-miR172b	TCONS_00030509	up	9
sbi-miR172b	TCONS_00038833	up	8
sbi-miR172b	TCONS_00042401	up	6
sbi-miR172b	TCONS_00055098	up	7
sbi-miR172b	TCONS_00056908	up	7
sbi-miR172b	TCONS_00059998	up	9
sbi-miR172b	TCONS_00074559	up	9
sbi-miR172b	TCONS_00082339	up	7
sbi-miR172b	TCONS_00089575	up	7
sbi-miR172b	TCONS_00092942	up	9
sbi-miR172b	TCONS_00092944	up	9
sbi-miR172b	TCONS_00111866	up	7
sbi-miR172b	TCONS_00121864	up	6
sbi-miR172b	TCONS_00125682	up	8
sbi-miR172b	TCONS_00141563	up	7
sbi-miR172b	TCONS_00144784	up	8
sbi-miR172b	TCONS_00162481	up	9
stu-miR156f-5p	SS.CHR11.2041	up	6
stu-miR156f-5p	SS.CHR11.454	up	6
stu-miR156f-5p	SS.CHR12.338	up	7
stu-miR156f-5p	SS.CHR14.1190	up	7
stu-miR156f-5p	SS.CHR17.804	up	7
stu-miR156f-5p	SS.CHR5.1173	up	6
stu-miR156f-5p	TCONS_00003763	up	6
stu-miR156f-5p	TCONS_00004024	up	7
stu-miR156f-5p	TCONS_00008645	up	6
stu-miR156f-5p	TCONS_00014594	up	7
stu-miR156f-5p	TCONS_00015941	up	6
stu-miR156f-5p	TCONS_00046920	up	7
stu-miR156f-5p	TCONS_00047320	up	7
stu-miR156f-5p	TCONS_00047324	up	6
stu-miR156f-5p	TCONS_00047325	up	7
stu-miR156f-5p	TCONS_00047327	up	7
stu-miR156f-5p	TCONS_00047342	up	6
stu-miR156f-5p	TCONS_00048876	up	7
stu-miR156f-5p	TCONS_00050555	up	6
stu-miR156f-5p	TCONS_00063235	up	7
stu-miR156f-5p	TCONS_00070157	up	7
stu-miR156f-5p	TCONS_00084359	up	7
stu-miR156f-5p	TCONS_00086341	up	7
stu-miR156f-5p	TCONS_00096734	up	6
stu-miR156f-5p	TCONS_00103705	up	6
stu-miR156f-5p	TCONS_00120657	up	7
stu-miR156f-5p	TCONS_00132740	up	7
stu-miR156f-5p	TCONS_00138519	up	7
stu-miR156f-5p	TCONS_00142013	up	6
stu-miR156f-5p	TCONS_00154481	up	6
stu-miR156f-5p	TCONS_00160979	up	7
stu-miR156f-5p	TCONS_00168706	up	6
stu-miR156f-5p	TCONS_00175727	up	6
vca-miR535-3p	SS.CHR1.200	up	7
vca-miR535-3p	SS.CHR13.2318	up	7
vca-miR535-3p	SS.CHR14.306	up	6
vca-miR535-3p	SS.CHR2.1585	up	8
vca-miR535-3p	SS.CHR5.1069	up	9
vca-miR535-3p	SS.CHR6.293_SS.CHR6.294	up	6
vca-miR535-3p	SS.CHR8.1212	up	7
vca-miR535-3p	SS.CHR8.255	up	7
vca-miR535-3p	SS.CHR8.699	up	7
vca-miR535-3p	SS.CHR8.957	up	9
vca-miR535-3p	SS.CHR8.959	up	6
vca-miR535-3p	TCONS_00032902	up	6
vca-miR535-3p	TCONS_00035665	up	9
vca-miR535-3p	TCONS_00041276	up	7
vca-miR535-3p	TCONS_00064018	up	6
vca-miR535-3p	TCONS_00079172	up	9
vca-miR535-3p	TCONS_00089776	up	6
vca-miR535-3p	TCONS_00111064	up	7
vca-miR535-3p	TCONS_00131091	up	9
vca-miR535-3p	TCONS_00137674	up	7
vca-miR535-3p	TCONS_00147463	up	9
vca-miR535-3p	TCONS_00147467	up	7
vca-miR535-3p	TCONS_00158477	up	7
vca-miR535-3p	TCONS_00158478	up	8
vca-miR535-3p	TCONS_00175857	up	7
vca-miR535-3p	TCONS_00177772	up	6

## Sheet: Table S4
Table S4. Connections in the lncRNA–miRNA–mRNA network using SS10 as control
miRNA	lncRNA/mRNA	Up/Down	Number of detected pairs
fve-miR11286	SS.CHR1.1124	up	6
fve-miR11286	SS.CHR11.1753	up	7
fve-miR11286	SS.CHR15.633	up	7
fve-miR11286	SS.CHR17.2016	up	7
fve-miR11286	SS.CHR5.1351	up	6
fve-miR11286	SS.CHR9.2233	up	6
fve-miR11286	TCONS_00019147	up	7
fve-miR11286	TCONS_00020041	up	6
fve-miR11286	TCONS_00046716	up	7
fve-miR11286	TCONS_00086566	up	6
fve-miR11286	TCONS_00086568	up	6
fve-miR11286	TCONS_00094841	up	7
fve-miR11286	TCONS_00104151	up	7
fve-miR11286	TCONS_00105430	up	6
fve-miR11286	TCONS_00115267	up	6
fve-miR11286	TCONS_00158572	up	7
fve-miR11286	TCONS_00165308	up	6
fve-miR11286	TCONS_00173080	up	6
fve-miR11286	TCONS_00173082	up	6
fve-miR11286	TCONS_00173083	up	6
gma-miR408d	SS.CHR13.2325	down	6
gma-miR408d	SS.CHR17.668	down	6
gma-miR408d	SS.CHR3.869	down	6
gma-miR408d	SS.CHR7.634	down	7
gma-miR408d	TCONS_00009127	down	6
gma-miR408d	TCONS_00017367	down	6
gma-miR408d	TCONS_00028264	down	6
gma-miR408d	TCONS_00087260	down	6
gma-miR408d	TCONS_00109078	down	7
gma-miR408d	TCONS_00123362	down	7
gma-miR408d	TCONS_00123420	down	6
ptc-miR530a	SS.CHR13.2428	up	8
ptc-miR530a	SS.CHR2.834	up	7
ptc-miR530a	SS.CHR3.821	up	9
ptc-miR530a	SS.CHR4.1159	up	9
ptc-miR530a	SS.CHR4.872	up	6
ptc-miR530a	SS.CHR4.935	up	9
ptc-miR530a	SS.CHR5.414	up	7
ptc-miR530a	SS.CHR6.755	up	8
ptc-miR530a	SS.CHR7.1570	up	8
ptc-miR530a	TCONS_00018303	up	6
ptc-miR530a	TCONS_00045609	up	8
ptc-miR530a	TCONS_00051870	up	6
ptc-miR530a	TCONS_00056770	up	6
ptc-miR530a	TCONS_00075657	up	8
ptc-miR530a	TCONS_00093579	up	7
ptc-miR530a	TCONS_00122472	up	7
ptc-miR530a	TCONS_00159921	up	6
stu-miR167d-3p	SS.CHR13.2043	down	6
stu-miR167d-3p	SS.CHR13.325	down	6
stu-miR167d-3p	SS.CHR17.2236	down	6
stu-miR167d-3p	SS.CHR3.507	down	7
stu-miR167d-3p	SS.CHR3.657	down	7
stu-miR167d-3p	SS.CHR9.1458	down	7
stu-miR167d-3p	TCONS_00009043	down	7
stu-miR167d-3p	TCONS_00038519	down	7
stu-miR167d-3p	TCONS_00076413	down	6
stu-miR167d-3p	TCONS_00078816	down	6
stu-miR167d-3p	TCONS_00098431	down	7
stu-miR167d-3p	TCONS_00124300	down	7
stu-miR167d-3p	TCONS_00143048	down	7
stu-miR167d-3p	TCONS_00164830	down	7

## Sheet: Table S5
Table S5. Connections in the circRNA–miRNA–mRNA network using SS1 as control
miRNA	circRNA/mRNA	Up/Down	Number of detected pairs
aly-miR157d-3p	novel_circ_0000910	up	6
aly-miR157d-3p	novel_circ_0001404	up	9
aly-miR157d-3p	SS.CHR1.823	up	9
aly-miR157d-3p	SS.CHR10.217	up	8
aly-miR157d-3p	SS.CHR11.2125	up	6
aly-miR157d-3p	SS.CHR15.1616	up	8
aly-miR157d-3p	SS.CHR16.2089	up	7
aly-miR157d-3p	SS.CHR8.317	up	7
aly-miR157d-3p	SS.CHR8.9	up	6
aly-miR172e-3p	novel_circ_0000702	up	9
aly-miR172e-3p	SS.CHR1.1569	up	6
aly-miR172e-3p	SS.CHR1.1598	up	8
aly-miR172e-3p	SS.CHR10.2186	up	8
aly-miR172e-3p	SS.CHR11.1189	up	6
aly-miR172e-3p	SS.CHR11.1732	up	8
aly-miR172e-3p	SS.CHR13.1690	up	9
aly-miR172e-3p	SS.CHR13.2324	up	9
aly-miR172e-3p	SS.CHR13.672	up	6
aly-miR172e-3p	SS.CHR14.1157	up	7
aly-miR172e-3p	SS.CHR15.2267	up	6
aly-miR172e-3p	SS.CHR16.2080	up	7
aly-miR172e-3p	SS.CHR18.419	up	6
aly-miR172e-3p	SS.CHR3.1353	up	9
aly-miR172e-3p	SS.CHR3.750	up	7
aly-miR172e-3p	SS.CHR5.760	up	6
aly-miR172e-3p	SS.CHR5.888	up	7
aly-miR172e-3p	SS.CHR6.130	up	9
aly-miR172e-3p	SS.CHR7.2196	up	8
ata-miR395b-3p	novel_circ_0001077	up	8
ata-miR395b-3p	SS.CHR1.1244	up	6
ata-miR395b-3p	SS.CHR10.323	up	6
ata-miR395b-3p	SS.CHR11.1814	up	8
ata-miR395b-3p	SS.CHR14.345	up	6
ata-miR395b-3p	SS.CHR14.679	up	7
ata-miR395b-3p	SS.CHR14.812	up	6
ata-miR395b-3p	SS.CHR14.906	up	6
ata-miR395b-3p	SS.CHR15.1230	up	6
ata-miR395b-3p	SS.CHR16.615	up	6
ata-miR395b-3p	SS.CHR16.934	up	7
ata-miR395b-3p	SS.CHR17.1527	up	6
ata-miR395b-3p	SS.CHR17.2126	up	8
ata-miR395b-3p	SS.CHR18.1979	up	6
ata-miR395b-3p	SS.CHR18.2163	up	8
ata-miR395b-3p	SS.CHR18.927	up	6
ata-miR395b-3p	SS.CHR3.1464	up	7
ata-miR395b-3p	SS.CHR4.1342	up	6
ata-miR395b-3p	SS.CHR6.1177	up	7
ata-miR395b-3p	SS.CHR6.1306	up	8
ata-miR395b-3p	SS.CHR8.1071	up	7
ata-miR395b-3p	SS.CHR8.1078	up	6
ata-miR395b-3p	SS.CHR8.1946	up	8
ata-miR395b-3p	SS.CHR9.75	up	8
ata-miR395b-3p	SS.CHR9.914	up	7
ath-miR159c	novel_circ_0001379	up	9
ath-miR159c	SS.CHR11.1732	up	8
ath-miR159c	SS.CHR11.786	up	6
ath-miR159c	SS.CHR13.1553	up	7
ath-miR159c	SS.CHR13.811	up	8
ath-miR159c	SS.CHR14.677	up	7
ath-miR159c	SS.CHR16.1184	up	6
ath-miR159c	SS.CHR16.1440	up	9
ath-miR159c	SS.CHR17.779	up	6
ath-miR159c	SS.CHR18.2056	up	6
ath-miR159c	SS.CHR18.266	up	6
ath-miR159c	SS.CHR7.1289	up	8
bdi-miR159a-3p	novel_circ_0001613	up	9
bdi-miR159a-3p	SS.CHR11.1980	up	9
bdi-miR159a-3p	SS.CHR15.1343	up	8
bdi-miR159a-3p	SS.CHR15.608	up	8
bdi-miR159a-3p	SS.CHR16.1184	up	6
bdi-miR159a-3p	SS.CHR16.1440	up	9
bdi-miR159a-3p	SS.CHR17.2468	up	6
bdi-miR159a-3p	SS.CHR18.1911	up	7
bdi-miR159a-3p	SS.CHR18.2056	up	6
bdi-miR159a-3p	SS.CHR18.2163	up	8
bdi-miR159a-3p	SS.CHR18.266	up	6
bdi-miR159a-3p	SS.CHR2.1585	up	8
bdi-miR159a-3p	SS.CHR2.68	up	6
bdi-miR159a-3p	SS.CHR7.1289	up	8
bdi-miR159a-3p	SS.CHR8.973	up	7
csi-miR167c-3p	novel_circ_0000466	up	8
csi-miR167c-3p	SS.CHR1.32	up	8
csi-miR167c-3p	SS.CHR10.1908	up	6
csi-miR167c-3p	SS.CHR10.892	up	8
csi-miR167c-3p	SS.CHR11.190	up	7
csi-miR167c-3p	SS.CHR14.2166	up	8
csi-miR167c-3p	SS.CHR16.1121	up	8
csi-miR167c-3p	SS.CHR17.2172	up	6
csi-miR167c-3p	SS.CHR2.277	up	7
csi-miR167c-3p	SS.CHR3.1520	up	7
csi-miR167c-3p	SS.CHR3.916	up	7
csi-miR167c-3p	SS.CHR3.935	up	6
csi-miR167c-3p	SS.CHR6.895	up	6
csi-miR167c-3p	SS.CHR9.2082	up	6
gma-miR396a-3p	novel_circ_0001983	up	9
gma-miR396a-3p	SS.CHR10.1041	up	6
gma-miR396a-3p	SS.CHR11.2034	up	6
gma-miR396a-3p	SS.CHR11.969	up	8
gma-miR396a-3p	SS.CHR12.619	up	6
gma-miR396a-3p	SS.CHR13.179	up	6
gma-miR396a-3p	SS.CHR14.2364	up	9
gma-miR396a-3p	SS.CHR17.165	up	7
gma-miR396a-3p	SS.CHR2.1840	up	8
gma-miR396a-3p	SS.CHR7.1909	up	8
gma-miR396a-3p	SS.CHR9.212	up	6
gma-miR6300	novel_circ_0001443	up	6
gma-miR6300	SS.CHR10.2055	up	6
gma-miR6300	SS.CHR12.1543	up	6
gma-miR6300	SS.CHR12.27	up	6
gma-miR6300	SS.CHR13.1955	up	6
gma-miR6300	SS.CHR13.2168	up	6
gma-miR6300	SS.CHR13.64	up	6
gma-miR6300	SS.CHR16.2285	up	6
gma-miR6300	SS.CHR3.1273	up	6
gma-miR6300	SS.CHR5.1148	up	6
gma-miR6300	SS.CHR9.1213	up	6
hbr-miR156	novel_circ_0000702	up	9
hbr-miR156	SS.CHR1.32	up	9
hbr-miR156	SS.CHR1.867	up	6
hbr-miR156	SS.CHR10.1401	up	7
hbr-miR156	SS.CHR10.1718	up	6
hbr-miR156	SS.CHR10.2094	up	8
hbr-miR156	SS.CHR11.2034	up	6
hbr-miR156	SS.CHR11.2102	up	6
hbr-miR156	SS.CHR11.454	up	8
hbr-miR156	SS.CHR11.734	up	6
hbr-miR156	SS.CHR11.866	up	6
hbr-miR156	SS.CHR13.1269	up	9
hbr-miR156	SS.CHR14.1190	up	9
hbr-miR156	SS.CHR14.806	up	9
hbr-miR156	SS.CHR15.124	up	7
hbr-miR156	SS.CHR15.1614	up	6
hbr-miR156	SS.CHR15.1645	up	8
hbr-miR156	SS.CHR3.1160	up	7
hbr-miR156	SS.CHR3.1338	up	9
hbr-miR156	SS.CHR3.349	up	7
hbr-miR156	SS.CHR4.233	up	7
hbr-miR156	SS.CHR4.236	up	9
hbr-miR156	SS.CHR4.330	up	8
hbr-miR156	SS.CHR5.1173	up	8
hbr-miR156	SS.CHR5.1687	up	7
hbr-miR156	SS.CHR6.69	up	9
hbr-miR156	SS.CHR6.72_SS.CHR6.74	up	8
hbr-miR156	SS.CHR7.1813	up	9
hbr-miR156	SS.CHR7.402	up	6
hbr-miR156	SS.CHR8.1277	up	7
hbr-miR156	SS.CHR8.802	up	6
hbr-miR156	SS.CHR9.1495	up	6
hbr-miR156	SS.CHR9.1573	up	8
hbr-miR156	SS.CHR9.573	up	6
lus-miR172j	novel_circ_0001019	up	8
lus-miR172j	SS.CHR1.1598	up	8
lus-miR172j	SS.CHR12.232	up	8
lus-miR172j	SS.CHR14.1021	up	7
lus-miR172j	SS.CHR15.150	up	6
lus-miR172j	SS.CHR16.1391	up	8
lus-miR172j	SS.CHR18.1455	up	8
lus-miR172j	SS.CHR18.857	up	6
lus-miR172j	SS.CHR5.920	up	8
lus-miR172j	SS.CHR7.1177	up	6
lus-miR172j	SS.CHR9.1826	up	7
mdm-miR319b-5p	novel_circ_0000952	up	8
mdm-miR319b-5p	novel_circ_0001821	up	8
mdm-miR319b-5p	novel_circ_0002521	up	6
mdm-miR319b-5p	SS.CHR14.1456	up	8
mdm-miR319b-5p	SS.CHR14.20	up	6
mdm-miR319b-5p	SS.CHR15.1488	up	7
mdm-miR319b-5p	SS.CHR17.309	up	6
mdm-miR319b-5p	SS.CHR18.1911	up	7
mdm-miR319b-5p	SS.CHR18.396	up	8
mdm-miR319b-5p	SS.CHR3.1563	up	6
mdm-miR319b-5p	SS.CHR3.372	up	6
mdm-miR319b-5p	SS.CHR4.296	up	8
mdm-miR319b-5p	SS.CHR7.2169	up	8
novel_102	novel_circ_0000156	up	7
novel_102	SS.CHR11.187	up	7
novel_102	SS.CHR12.815	up	7
novel_102	SS.CHR13.898	up	7
novel_102	SS.CHR14.2200	up	6
novel_102	SS.CHR16.797	up	7
novel_102	SS.CHR18.1118	up	6
novel_102	SS.CHR5.409	up	6
novel_102	SS.CHR6.274	up	7
novel_102	SS.CHR8.1789	up	7
osa-miR159a.1	novel_circ_0001613	up	9
osa-miR159a.1	SS.CHR11.1732	up	8
osa-miR159a.1	SS.CHR11.786	up	6
osa-miR159a.1	SS.CHR14.677	up	7
osa-miR159a.1	SS.CHR15.608	up	8
osa-miR159a.1	SS.CHR16.1184	up	6
osa-miR159a.1	SS.CHR16.1440	up	9
osa-miR159a.1	SS.CHR17.779	up	6
osa-miR159a.1	SS.CHR18.2056	up	6
osa-miR159a.1	SS.CHR18.266	up	6
osa-miR159a.1	SS.CHR2.68	up	6
osa-miR396a-3p	novel_circ_0001983	up	8
osa-miR396a-3p	SS.CHR11.969	up	7
osa-miR396a-3p	SS.CHR14.1456	up	8
osa-miR396a-3p	SS.CHR14.2364	up	8
osa-miR396a-3p	SS.CHR2.1840	up	7
osa-miR396a-3p	SS.CHR3.1535	up	7
osa-miR396a-3p	SS.CHR3.712	up	8
osa-miR396a-3p	SS.CHR4.244	up	7
osa-miR396a-3p	SS.CHR4.250	up	7
osa-miR396a-3p	SS.CHR9.1863	up	8
sbi-miR172b	novel_circ_0000702	up	9
sbi-miR172b	SS.CHR1.1598	up	8
sbi-miR172b	SS.CHR10.2211	up	6
sbi-miR172b	SS.CHR11.1732	up	8
sbi-miR172b	SS.CHR11.541	up	7
sbi-miR172b	SS.CHR13.1690	up	9
sbi-miR172b	SS.CHR13.2324	up	9
sbi-miR172b	SS.CHR13.672	up	6
sbi-miR172b	SS.CHR15.313	up	6
sbi-miR172b	SS.CHR16.2054	up	7
sbi-miR172b	SS.CHR16.2080	up	7
sbi-miR172b	SS.CHR16.847	up	8
sbi-miR172b	SS.CHR17.1469	up	8
sbi-miR172b	SS.CHR4.1301	up	7
sbi-miR172b	SS.CHR5.888	up	7
sbi-miR172b	SS.CHR6.130	up	9
zma-miR396g-5p	novel_circ_0002493	up	6
zma-miR396g-5p	novel_circ_0002495	up	6
zma-miR396g-5p	SS.CHR1.438	up	8
zma-miR396g-5p	SS.CHR13.1116	up	7
zma-miR396g-5p	SS.CHR15.1265	up	6
zma-miR396g-5p	SS.CHR16.1846	up	7
zma-miR396g-5p	SS.CHR16.797	up	8
zma-miR396g-5p	SS.CHR18.1522	up	8
zma-miR396g-5p	SS.CHR4.1664	up	6
zma-miR396g-5p	SS.CHR4.438	up	7
zma-miR396g-5p	SS.CHR7.1054	up	6
zma-miR396g-5p	SS.CHR9.158	up	8

## Sheet: Table S6
Table S6. Connections in the circRNA–miRNA–mRNA network using SS10 as control
miRNA	circRNA/mRNA	Up/Down	Number of detected pairs
ath-miR408-3p	novel_circ_0002113	up	7
ath-miR408-3p	SS.CHR11.1620	up	7
ath-miR408-3p	SS.CHR3.869	up	6
gma-miR408d	novel_circ_0002113	up	7
gma-miR408d	SS.CHR13.2325	up	6
gma-miR408d	SS.CHR17.668	up	6
gma-miR408d	SS.CHR3.869	up	6
gma-miR408d	SS.CHR7.634	up	7
ppt-miR408b	novel_circ_0002113	up	7
ppt-miR408b	SS.CHR11.1620	up	7
ppt-miR408b	SS.CHR13.2325	up	6
ppt-miR408b	SS.CHR3.869	up	6

## Sheet: Table S7
Table S7. Phenotype values of HT, DBH, and VW in ten individuals
Individual	HT	DBH	VW
SS1	16.2	23.4	0.3454
SS2	15.3	18.4	0.208
SS3	13.5	19.4	0.2031
SS4	11.6	20.1	0.1869
SS5	9.7	21.3	0.1747
SS6	9.6	20	0.1537
SS7	9.9	14.9	0.0912
SS8	10.9	12.3	0.07
SS9	11.8	11.7	0.0689
SS10	9.8	12	0.0602

## Sheet: Table S8
Table S8. Full names of the species used in miRNA naming
Abbreviation	Species
aqu	Amphimedon queenslandica
nve	Nematostella vectensis
hma	Hydra magnipapillata
sko	Saccoglossus kowalevskii
spu	Strongylocentrotus purpuratus
cin	Ciona intestinalis
csa	Ciona savignyi
odi	Oikopleura dioica
bfl	Branchiostoma floridae
xla	Xenopus laevis
xtr	Xenopus tropicalis
gga	Gallus gallus
cfa	Canis familiaris
mdo	Monodelphis domestica
age	Ateles geoffroyi
lla	Lagothrix lagotricha
sla	Saguinus labiatus
mml	Macaca mulatta
mne	Macaca nemestrina
pbi	Pygathrix bieti
ggo	Gorilla gorilla
hsa	Homo sapiens
ppa	Pan paniscus
ppy	Pongo pygmaeus
ptr	Pan troglodytes
ssy	Symphalangus syndactylus
lca	Lemur catta
oan	Ornithorhynchus anatinus
cgr	Cricetulus griseus
mmu	Mus musculus
rno	Rattus norvegicus
bta	Bos taurus
oar	Ovis aries
ssc	Sus scrofa
dre	Danio rerio
fru	Fugu rubripes
tni	Tetraodon nigroviridis
aga	Anopheles gambiae
ame	Apis mellifera
bmo	Bombyx mori
dan	Drosophila ananassae
der	Drosophila erecta
dgr	Drosophila grimshawi
dme	Drosophila melanogaster
dmo	Drosophila mojavensis
dpe	Drosophila persimilis
dps	Drosophila pseudoobscura
dse	Drosophila sechellia
dsi	Drosophila simulans
dvi	Drosophila virilis
dwi	Drosophila willistoni
dya	Drosophila yakuba
lmi	Locusta migratoria
tca	Tribolium castaneum
dpu	Daphnia pulex
isc	Ixodes scapularis
cbr	Caenorhabditis briggsae
cel	Caenorhabditis elegans
sja	Schistosoma japonicum
sma	Schistosoma mansoni
sme	Schmidtea mediterranea
cte	Capitella teleta
cla	Cerebratulus lacteus
hru	Haliotis rufescens
lgi	Lottia gigantea
ddi	Dictyostelium discoideum
cre	Chlamydomonas reinhardtii
pta	Pinus taeda
ppt	Physcomitrella patens
smo	Selaginella moellendorffii
ath	Arabidopsis thaliana
bna	Brassica napus
bol	Brassica oleracea
bra	Brassica rapa
cpa	Carica papaya
gma	Glycine max
lja	Lotus japonicus
mtr	Medicago truncatula
vun	Vigna unguiculata
ghb	Gossypium herbaceum
ghr	Gossypium hirsutum
gra	Gossypium raimondii
ptc	Populus trichocarpa
sly	Solanum lycopersicum
vvi	Vitis vinifera
osa	Oryza sativa
sbi	Sorghum bicolor
sof	Saccharum officinarum
tae	Triticum aestivum
zma	Zea mays
bkv	BK polyomavirus
ebv	Epstein Barr virus
hcmv	Human cytomegalovirus
hiv1	Human immunodeficiency virus 1
hsv1	Herpes Simplex Virus 1
jcv	JC polyomavirus
kshv	Kaposi sarcoma-associated herpesvirus
mcmv	Mouse cytomegalovirus
mcpv	Merkel cell polyomavirus
mdv1	Mareks disease virus type 1
mdv2	Mareks disease virus type 2
mghv	Mouse gammaherpesvirus 68
rlcv	Rhesus lymphocryptovirus
rrv	Rhesus monkey rhadinovirus
sv40	Simian virus 40
hsv2	Herpes Simplex Virus 2
pvu	Phaseolus vulgaris
mdm	Malus domestica
crm	Caenorhabditis remanei
ppc	Pristionchus pacificus
hbv	Herpes B virus
bdi	Brachypodium distachyon
aqc	Aquilegia caerulea
iltv	Infectious laryngotracheitis virus
hvt	Herpesvirus of turkeys
peu	Populus euphratica
eca	Equus caballus
ola	Oryzias latipes
bhv1	Bovine herpesvirus 1
csi	Citrus sinensis
ccl	Citrus clementina
crt	Citrus reticulata
ctr	Citrus trifoliata
bma	Brugia malayi
api	Acyrthosiphon pisum
rco	Ricinus communis
aae	Aedes aegypti
gar	Gossypium arboreum
cqu	Culex quinquefasciatus
tgu	Taeniopygia guttata
aly	Arabidopsis lyrata
esi	Ectocarpus siliculosus
nvi	Nasonia vitripennis
ahy	Arachis hypogaea
gso	Glycine soja
pab	Picea abies
smr	Strigamia maritima
ttu	Triticum turgidum
ata	Aegilops tauschii
hvu	Hordeum vulgare
far	Festuca arundinacea
ngi	Nasonia giraulti
nlo	Nasonia longicornis
bgy	Bruguiera gymnorhiza
bcy	Bruguiera cylindrica
cln	Cunninghamia lanceolata
pma	Petromyzon marinus
tcc	Theobroma cacao
xbo	Xenoturbella bocki
egr	Echinococcus granulosus
emu	Echinococcus multilocularis
hme	Heliconius melpomene
gpy	Glottidia pyramidata
tre	Terebratulina retusa
rgl	Rehmannia glutinosa
cme	Cucumis melo
bpcv1	Bandicoot papillomatosis carcinomatosis virus type 1
bpcv2	Bandicoot papillomatosis carcinomatosis virus type 2
ssp	Saccharum sp.
rmi	Rhipicephalus microplus
asu	Ascaris suum
aca	Anolis carolinensis
amg	Acacia mangium
aau	Acacia auriculiformis
pti	Phaeodactylum tricornutum
hvsa	Herpesvirus saimiri strain A11
meu	Macropus eugenii
ssl	Salvia sclarea
tur	Tetranychus urticae
sha	Sarcophilus harrisii
hco	Haemonchus contortus
hhv6b	Human herpesvirus 6B
dpr	Digitalis purpurea
nta	Nicotiana tabacum
stu	Solanum tuberosum
egu	Elaeis guineensis
mes	Manihot esculenta
mse	Manduca sexta
cca	Cynara cardunculus
lus	Linum usitatissimum
pgi	Panax ginseng
hbr	Hevea brasiliensis
mja	Marsupenaeus japonicus
prv	Pseudorabies virus
pde	Pinus densata
pol	Paralichthys olivaceus
han	Helianthus annuus
hci	Helianthus ciliaris
htu	Helianthus tuberosus
hex	Helianthus exilis
har	Helianthus argophyllus
hpe	Helianthus petiolaris
hpa	Helianthus paradoxus
hhi	Hippoglossus hippoglossus
blv	Bovine leukemia virus
ccr	Cyprinus carpio
dev	Duck enteritis virus
ppe	Prunus persica
aja	Artibeus jamaicensis
ipu	Ictalurus punctatus
cbn	Caenorhabditis brenneri
sci	Sycon ciliatum
lco	Leucosolenia complicata
prd	Panagrellus redivivus
pmi	Patiria miniata
lva	Lytechinus variegatus
ama	Avicennia marina
bbe	Branchiostoma belcheri
ssa	Salmo salar
str	Strongyloides ratti
pxy	Plutella xylostella
atr	Amborella trichopoda
pin	Phytophthora infestans
psj	Phytophthora sojae
pra	Phytophthora ramorum
efu	Eptesicus fuscus
gsa	Gyrodactylus salaris
bhv5	Bovine herpesvirus 5
cpi	Chrysemys picta
ami	Alligator mississippiensis
cli	Columba livia
pbv	Python bivittatus
bfv	Bovine foamy virus
chi	Capra hircus
ocu	Oryctolagus cuniculus
oha	Ophiophagus hannah
tch	Tupaia chinensis
cja	Callithrix jacchus
pal	Pteropus alecto
hpo	Heligmosomoides polygyrus
sfv	Simian foamy virus
ttv	Torque teno virus
vca	Vriesea carinata
eun	Eugenia uniflora
tcf	Triops cancriformis
sfr	Spodoptera frugiperda
ptvpv2a	Pan troglodytes verus polyomavirus 2a
gggpv1	Gorilla gorilla gorilla polyomavirus 1
racpv	Raccoon polyomavirus
oni	Oreochromis niloticus
abu	Astatotilapia burtoni
mze	Metriaclima zebra
nbr	Neolamprologus brichardi
pny	Pundamilia nyererei
seu	Salicornia europaea
eel	Electrophorus electricus
gmo	Gadus morhua
fve	Fragaria vesca
cst	Cucumis sativus
fhe	Fasciola hepatica
apl	Anas platyrhynchos
bib	Biston betularia
cas	Camelina sativa
bdo	Bactrocera dorsalis
pla	Paeonia lactiflora
dqu	Dinoponera quadriceps
pca	Polistes canadensis
pte	Parasteatoda tepidariorum
mco	Mesocestoides corti
cpo	Cavia porcellus
dno	Dasypus novemcinctus
mle	Melibe leonina
smi	Salvia miltiorrhiza
mmr	Microcebus murinus
dma	Daubentonia madagascariensis
nle	Nomascus leucogenys
sbo	Saimiri boliviensis
oga	Otolemur garnettii
pha	Papio hamadryas
aof	Asparagus officinalis
smc	Symbiodinium microadriaticum

## Sheet: Table S9
Table S9. FPKM values of lncRNAs
lncRNA	SS1	SS2	SS3	SS4	SS5	SS6	SS7	SS8	SS9	SS10
TCONS_00000022	0.283941	0.160657	0.108526	0.814443	0	0.126917	0.1106	0.404952	0	0
TCONS_00003619	0	0.056009	0.042473	0.114697	0.060041	0.137791	0.222418	0.333978	0.278404	0.257247
TCONS_00000035	0.252269	0.016829	0.127826	0.115687	0.231899	0	0.356705	0.206613	0.207257	0
TCONS_00000036	0.430443	0.594963	0.101404	0.097589	0.390202	0.582809	0.079836	0.5258	0	0.099079
TCONS_00003634	0.280036	0.178264	0.145796	0.747058	0.162333	0.330591	0.252379	0.329086	0.797585	0.706627
TCONS_00000049	0	0.400326	0.124955	0.423386	0.107525	0.098487	0.515797	0.075996	0.051659	0.021779
TCONS_00000050	0.150208	0	0.048387	0.076637	0.154665	0	0	0	0.068419	0.927455
TCONS_00000066	0.044867	0.041531	0.181053	0.067381	0.337895	0.192512	0.297003	0.029338	0.047562	0.023822
TCONS_00003661	0.062872	0.074855	0	0.092578	0.046144	0.053838	0.599799	0.008024	0	0
TCONS_00003659	0.339395	0.294291	0	0.385804	1.16551	0.645157	0.379591	0.259969	0.535158	0
TCONS_00000080	0.658255	0.533251	0.527872	0.506575	1.45309	0.884809	0.879988	0.894566	0.325469	0.870163
TCONS_00003671	0.153453	0.22745	0.306101	0.54683	0.207372	0.449353	0.051274	1.04933	0.133974	0.243973
TCONS_00000092	0.504102	0.172593	0.074525	0.405583	0.641819	0.347505	0.14024	0.153906	0.115287	0.174104
TCONS_00000093	0.143881	0.408132	0	0.359701	0.009744	0	0.261744	0.092543	0.127597	0.464525
TCONS_00000094	0.230594	0.021319	0.195816	0.030233	0	0.166881	0.258067	0.549577	0	0.003122
TCONS_00003697	0	0	0	0.157627	0.084579	0	0	0.435283	0	0
TCONS_00003708	0	0.459217	0	0	0	0	0	0	0	0.024737
TCONS_00000120	0.022419	0.098217	0.5787	0	0.087757	0	0	0.232459	0.020015	0
TCONS_00000119	0	0.239044	0.474021	0.298153	0.328825	0	0	0.145254	0.325108	0.171563
TCONS_00003713	0.030228	0.262835	0.067251	0.674411	0.093367	0.421893	0	0.476511	0	0.124417
TCONS_00000126	0.016081	0.28797	0	0.487293	0	0.249849	0	0.189512	0	0
TCONS_00003717	0.185803	0.087695	0	0.696759	0.023594	0	0	0	0.016035	0
TCONS_00000125	0.516873	0.643287	0.378465	0.642298	0.413723	0.923247	1.05106	0.686669	0.878549	0.405164
TCONS_00003720	0	0	0.025856	0	0	0	0.499856	0	0.207117	0.085133
TCONS_00003736	0	0	0.0684	0.042139	0	0	0.306317	0.61209	0.031395	0.739959
TCONS_00003740	0	0.078386	0.222965	0.119567	0.604886	0.342569	0.359656	0.313701	0.160411	0.020637
TCONS_00000135	0	0	0	0	0	0	0.604175	0	0	0
TCONS_00003744	0	0	0	0	0	0.943464	0	0	0	0
TCONS_00000137	0	0	0	0.464056	0	0	0	0.028293	0.286743	0
TCONS_00000138	0	0	0	0	0	0	0.444651	0	0	0
TCONS_00003746	1.03235	0.179109	0	0.098399	0.18313	0.257699	0.125231	0.343579	0	0
TCONS_00003732	0.55538	0.585665	0.268583	0.15543	0.027885	0	0.699935	0.250665	0	0.063798
TCONS_00003747	0.44685	0	0.137832	0.05257	0.638229	0.861081	0.570388	0.437498	0.144542	0
TCONS_00003735	0.498117	0.403844	0.266442	0.776838	0.040012	0.064927	0.356782	0.311902	0.079351	0
TCONS_00003745	0.042114	1.64831	0	0	0.183153	0	0	0	1.12473	0
TCONS_00003729	0.016271	0.05824	0.367238	0.631045	0	0.729357	0	0	0.067689	0
TCONS_00003738	0.517109	0.206933	0.114452	0.066622	0.211155	0.245609	0	0.099958	0.143791	0.057331
TCONS_00003741	0.083688	0.218376	0.192171	0.138359	0.205459	0.094131	0.263903	0.281642	0.476207	0
TCONS_00003731	0.043242	0.123544	0.045855	0.140004	0.111548	0	0.1264	0.062116	0.508725	0
TCONS_00003742	0.712746	0.237856	0.230239	0.525799	0.170364	0.292583	0	0	0	0.318963
TCONS_00003730	0.590578	0	0	0	0.274228	0	0	0	0	0
TCONS_00003749	0.503981	0.990517	0.179433	0.783621	0.354595	0.660528	0.199131	0.739188	0.014006	0.038624
TCONS_00003734	0.410454	0.273743	0.546574	0.200763	0.25261	0.409914	0.488755	1.31923	0.115834	0.286312
TCONS_00003743	0.069624	0	0	0.011039	0.130516	0	0	0.028893	0.632042	0.008324
TCONS_00003733	0.010013	0.194171	0.84167	0.139391	0.10291	0.136549	0.316592	0.422699	0.065728	0
TCONS_00000140	0.036408	0	0	0.45661	0.036985	0	0	0.113682	0	0
TCONS_00000147	0	0	0	0	0.079024	0	0.079952	0.553871	0.207887	0
TCONS_00000152	0.159161	0.064558	0.563795	0	0.068664	0.150325	0.068297	0.061687	0.060752	0.069551
TCONS_00003762	0	0.179557	0.411759	0.249625	0	0.603737	0	0.565718	0	0.168613
TCONS_00003764	0	0	0	0	0.775236	0.515696	0.598157	0	0	0
TCONS_00003765	0	0	0	0	0	0.233151	0	0	0	0
TCONS_00003768	0	0.233256	0.364063	2.12718	1.10593	0.42636	0.866742	1.24673	0.003322	0.995966
TCONS_00000150	1.0266	0	0.891835	0	0	0.73941	0.712158	0.430236	0.336228	0.243022
TCONS_00003769	0.458114	0.639157	0	0.029814	0.058343	0.444918	0.813787	0.729409	0	0.007219
TCONS_00003766	2.03035	0	0.451812	0	0	0	0	0	0.387757	0
TCONS_00003763	0.292977	0	0	0.000279	0.193024	0	0	0.406638	0.007715	0.000413
TCONS_00003767	1.25228	1.28101	0.699144	0.704305	0.339964	1.01283	0.420811	0.848117	0.569259	0.476461
TCONS_00003772	0.129712	0.308808	0.187057	0.217731	0	0	0.169025	0	0	0.705493
TCONS_00003774	0	0	0.240111	0.160913	0.338371	0	0.741746	0	0	0.138864
TCONS_00000172	0	0.501307	0.150408	0	0	0	0	0	0	0
TCONS_00000182	0	0.135785	0	0.193229	0.458271	0	0	0	0.100687	0
TCONS_00003805	0.130395	0.046205	0.151687	0.124886	0.489739	0.154865	0.283137	0.370861	0.061486	0.069922
TCONS_00003813	0.363148	0	0.099811	0.452818	0.453279	0.423078	0.18693	0.121879	0.075505	0.13849
TCONS_00003818	0.459524	0.102341	0	0.190281	0.117387	0.107969	0.106889	0.202577	0	0.107151
TCONS_00000215	0.013342	0.540662	0.385513	0	0	0.121189	0.114273	0.160798	0	0.125137
TCONS_00003816	0.509283	1.61635	0.203027	2.02262	0.61075	2.0604	1.66405	3.57964	0.757342	2.40719
TCONS_00003817	0.081266	0	0.112039	0.866591	0.063648	0	0	0	0	2.68187
TCONS_00000218	0.361115	0	0.649366	0	0	0.278233	0.012006	0.404775	0	0
TCONS_00000223	1.3816	0.704419	0.759584	0.392606	0.950337	0.64794	1.16977	0.538024	1.71032	0.792569
TCONS_00000226	0.206672	0.107582	0.060226	0	0.428189	0.455996	0.48267	0.168899	0.055852	0
TCONS_00003826	0.508343	0.261148	0.382263	0.459212	0.407591	0.163835	0.259413	0.261184	0.35485	0.742362
TCONS_00000233	0.739566	0.624645	0.303974	0.283768	0.246786	0.028173	0.143478	0.493674	0.329673	0.289896
TCONS_00000234	0.006654	0	0	0	0	0.14463	0	0.488211	0.109903	0
TCONS_00003845	0.113254	0	0	0	0	0	0.67481	0	0.093596	0
TCONS_00003849	0	0.172507	0.14525	0.356991	0.150035	0	0.082798	0	0.423071	0.579745
TCONS_00003850	0	0	0	0	0	0	0.504489	0	0.066898	0
TCONS_00003839	0	0	0	0	0	0	0.513757	0	0	0
TCONS_00003840	0	1.0541	0	0	0	0	0	0	0	0
TCONS_00003842	0	0	0	0	0.561869	0.15418	0	0	0	0
TCONS_00003841	0.054833	0	0	0	0.554057	0	0	0	0	0
TCONS_00000266	0.476066	0	0	0	0	0	0	0	0	0
TCONS_00000276	0	0	0	0	0	0	0.500832	0	0	0
TCONS_00003867	0	1.21207	0	0	0.774701	0.059437	0.074878	0	0	0.059865
TCONS_00003868	0	0	0	0.677834	0	0	0	0	0	0
TCONS_00003869	0	0	0.106479	0	0.040496	0.887838	0	0	0	0
TCONS_00003872	0	0	0	0	0	0.020988	0.455152	0	0	0
TCONS_00003873	0	0.045993	0	0	0	0	0.476127	0	0	0
TCONS_00003878	0	0	0	0	0	0	2.04151	0	0	0
TCONS_00000328	0	0	0	0	0	2.09261	0	1.19099	0.110853	0
TCONS_00000329	0	0	0.464626	0	0	0.686952	0	0	0	0.461217
TCONS_00003961	0	0	0.040408	0.768305	0.300496	0.141355	0.063822	0.075996	0	0.234984
TCONS_00000333	0	0.245426	0.214381	0.648908	0.131839	0.150947	0.266775	0	0	0.256059
TCONS_00000334	0	0.448913	0	0	0	0	0	0	0.086035	0
TCONS_00000335	0	0.025823	0.101996	0	0	0	0	0.950598	0	0.405669
TCONS_00003861	1.01592	0.281595	0	0.303278	0	0.426305	0	0	0	0
TCONS_00003863	0.237364	0.09512	0.180129	0.346008	0.136717	0.355731	0.196975	0.47353	0.260798	0.256768
TCONS_00003870	0.589502	0	0.074037	0.231209	0.33149	0.113479	0	0	0.202026	0
TCONS_00003871	0.148258	0.215162	0.065307	0.532938	0.240572	0	0.109102	0.32697	0.049238	0.060209
TCONS_00003874	0.083853	0	0.553434	0.334292	0	0	0.453318	0	0.298947	0
TCONS_00000268	1.13191	2.10362	0.60963	2.53045	3.88161	2.2982	1.47334	1.84891	3.06201	0.981375
TCONS_00000294	0.034206	0.068221	0.035141	0.182737	0.359375	0	0.033741	0.581222	0.332436	0.165249
TCONS_00000327	0.830467	1.2373	0.917403	0	0	1.27446	0	0.123439	0	0.599926
TCONS_00000331	0.054667	0	1.19504	0	0.049306	0	0	0	0	0.519574
TCONS_00000332	0.088742	0.185442	0.966872	0	0.179699	0	0	0.057153	0.077384	0.020437
TCONS_00000330	0.065323	0.002421	1.09324	0	0.37542	0.443692	0	0.085018	0	0.566945
TCONS_00003980	0.413255	0.320743	0.409565	0.088614	0.269176	0.277249	0.018222	0.091797	1.08027	0.639353
TCONS_00003979	0.235188	0.425483	0.07403	0	1.69402	0.377389	0	0	0	0.668759
TCONS_00003954	0.163839	0.370986	1.4816	0	0.176834	0.143924	0	0.112911	0.30706	0
TCONS_00003978	0.144991	0.182954	0.280341	0.436673	0.861301	0.764797	0.194098	0.076246	0.618841	0.230007
TCONS_00003898	0.024651	0.363687	0.582398	0	0.005674	0	0.119307	0	0.538144	0.434472
TCONS_00004038	0.264997	0.041537	0	0.405289	0.644204	0	0.056074	0.094114	0.257458	0
TCONS_00000384	0	0.081655	0	0	0	0	0.665682	0.072177	0.114684	0
TCONS_00004042	0.63682	0.267615	0	0.190574	0	0.113022	0.362648	0	0.12592	0
TCONS_00000394	0.193047	0.573909	0.093846	0.14609	0.686671	0.211719	0.3569	0.078043	0	0.194228
TCONS_00004046	0	0.329999	0.512455	0	0.471145	0.270617	0.358704	0	0.207724	1.06301
TCONS_00000395	0	0	0	0	0	0.840239	0.006187	0.083746	0	0
TCONS_00000340	0	0	0	0	0	0	0	0	3.35771	1.61793
TCONS_00000341	0	0	0.353489	0.036875	0	0	0.063791	0.102317	1.18994	0.906896
TCONS_00000343	0	0	0.076885	0	0	0.662302	0.004449	0	0.553327	0.254746
TCONS_00003990	0	0	0.113587	0.011832	0	0.253759	0.05074	0	0	0
TCONS_00003991	0	0	4.72463	0	0	0	0.156324	0	0	0
TCONS_00003992	0	0	0	0	0	0.794791	0.000974	1.26616	0	0
TCONS_00003994	0	0.257529	0.39914	0	0.330588	0.317463	0	0	0.239617	0
TCONS_00003997	0	0	0.170071	0	0	0	0.130191	0	0	0.587497
TCONS_00000348	0	0	0.738734	0	0.187779	0	0	0	0	0
TCONS_00004000	0	0	0	0	0	0	0.506984	0	0	0
TCONS_00004001	0	0	0	0	0	0	0	1.14189	0	0
TCONS_00000350	0	0	0	0.175081	0.126439	1.39625	0.720812	0.10612	0.370029	0
TCONS_00004011	0	0	2.89111	0	0	0	0	0	0.007877	0
TCONS_00004018	0	0	0	0.691249	0	0	0	0	0	1.45368
TCONS_00000363	0	0.251136	0.161598	0.293483	0	0	0	0.722582	0	0.438007
TCONS_00000367	0	0	0	0	0.07188	0.658379	0.111994	0	0	0.333807
TCONS_00000370	0	0	0	0	0.448739	0	0	0.40121	0.253414	0.479027
TCONS_00000381	0	0	0	0	0	0.107665	0.002854	0.484623	0.030853	0
TCONS_00000383	0	0	0	0.100437	1.62383	0	0	0.09624	0	0
TCONS_00000344	0.468816	0	0.273572	0	0	0.156402	0	0	0.386672	0.35537
TCONS_00000345	0.725892	0	0	0	0	0.373249	0.108004	0	0.764609	0.145894
TCONS_00004007	1.0238	0.085303	0	0	0	0.351094	0.017521	0.269495	0.026428	0
TCONS_00003988	2.61405	0.794152	0.318151	0.273964	0.181646	0.349272	1.34932	1.77613	8.0732	4.81538
TCONS_00003995	0.30109	0.869837	0.728614	0.263536	0	0.681584	0.137235	1.05192	1.11681	0.305687
TCONS_00003998	0.107611	0.392753	0	0	1.76817	0	0.045715	1.48924	0	0
TCONS_00004005	0.699379	0	0	0	0	0.169231	0	0	0.06495	0
TCONS_00004010	0.349204	0	0.480697	0	0.736579	0.043248	0.073111	0	0.180417	0
TCONS_00003993	0.070479	0.131492	0.077614	0	0.19653	0.158445	0	0.145611	0.120354	0.635831
TCONS_00003999	0.069333	0.458897	0.327551	0	0.633655	0	0.319954	1.01614	0	0
TCONS_00004012	0.166733	0.21964	2.88841	1.68116	0.793187	2.01734	0.661446	0.072886	2.51008	4.02145
TCONS_00004017	1.45165	1.43998	0	0.676099	0.572422	0.099117	0.747034	1.72788	0	1.61886
TCONS_00004024	2.898	0.003554	0.691178	0	0.006801	0.525269	0.035489	0	0	0.615516
TCONS_00000369	0.613551	0	0	0	0.760293	0	0	1.25025	1.0195	0.560663
TCONS_00000360	1.03638	0	0	0	0.17371	0	0.127923	0.893269	0	1.28724
TCONS_00000356	0.187162	0.313	0.631903	0.608696	0.044412	3.46269	0.460581	0.043888	0.524121	0.237583
TCONS_00004034	4.16029	1.55886	1.08207	0	0.487556	0	1.55691	0	0.315839	0
TCONS_00004026	1.36919	0	0	0.520329	0.223135	0.386525	0.150937	0.025764	0	0
TCONS_00004037	18.6952	0.500403	0.638052	0	2.21954	0.108052	3.35461	0	0.16588	0
TCONS_00004036	0.215281	0.030341	0.71202	0	0.660218	0.59534	0.126998	0.030948	0	0
TCONS_00004059	0	0	0	0.463257	0	0	0	0	0	0
TCONS_00004058	0.565076	0.064094	0.077194	0.237252	0.165507	0	0.286574	0.093892	0.149278	0.078213
TCONS_00004057	0.493392	0	0.080264	0	0	0	0.273734	0.20955	0.212423	0
TCONS_00004062	0.29816	0.158564	0.454135	0.184775	0.55316	0.469694	0.474197	0.290206	0.149966	0.118242
TCONS_00004063	0.607086	0.407499	0.624554	0.83786	0.569261	0.044433	0.723224	0.628847	0.382903	0.495243
TCONS_00004068	0	0	0	0	0	0	0.49017	0.045978	0	0
TCONS_00000462	0	0	0	0.438818	0	0	0.096212	0.078551	0.145462	0.887914
TCONS_00000466	0	0	0	0	0	0.530845	0	0	0	0
TCONS_00000461	1.71538	2.21459	2.85582	3.39766	1.69404	0	0.760008	3.43646	4.57274	1.3606
TCONS_00000463	0.125495	0.63052	0.891159	0	0.171648	1.62473	0	0	0	0.621448
TCONS_00000460	0.205374	0.602159	0.327627	0.381298	0.115774	0.458747	0.028601	0.699212	0.429762	0.124009
TCONS_00004083	0.302591	0	0.356094	0.78687	0	0.194144	0	0	0	0
TCONS_00000465	0.33969	0.055124	0	0.324144	0.059223	0	0	0	0.454727	0.077341
TCONS_00000468	0.334684	0.470555	0.094804	0.083497	0.285259	0.601775	0.212987	0.358664	0.482005	0.043848
TCONS_00000474	0.289394	0	0	0	0.125992	0	0	0.130954	0	0.592561
TCONS_00000476	0.610094	0.459131	0.411213	0	0.347815	0	0.115653	0.552515	0.725577	0
TCONS_00000479	0.2698	0.583419	0	0.139963	0	0	0.865848	0	0	0.199112
TCONS_00000478	0.184337	0.589307	0	0	0	0	0.131166	0.042196	0	0.12991
TCONS_00000477	0.093464	0.560802	0	0	0	0	0.636301	0	0	0.05294
TCONS_00000500	0.288397	0.320172	0.28378	0.297579	0	2.69245	0.431489	0	1.94963	0.213845
TCONS_00000487	0	0.739771	0.307529	0	0.136397	1.06759	0.751485	0.464098	0.323942	0.878752
TCONS_00000492	0	0	0	0.495644	0	0	0	0	0	0
TCONS_00000493	0	0	0	0	0	0.515683	0.018987	0	0	0
TCONS_00000494	0	0	0	0	0	0.128878	0.461236	0	0	0
TCONS_00000495	0	0	0	0	0	0	0.577553	0	0	0
TCONS_00000496	0	0	0	0	0	0	0.529118	0	0	0
TCONS_00000497	0	0	0	0.011601	0	0	0.656386	0	0	0
TCONS_00000498	0	0.631068	0.305183	0	0.033388	0	0.03378	0	0	0
TCONS_00000491	1.28804	0.359716	0.318193	0.299814	0.02147	0.726176	1.1664	1.54263	0.124871	1.746
TCONS_00000488	0.636477	0.498601	0.005732	0	3.12775	0.425726	0.766075	1.44427	0.297673	2.56745
TCONS_00000499	0.321147	0.779137	0.423415	0	0.926727	0.07274	0.826958	1.22899	0.038516	1.71102
TCONS_00000486	0.038957	0	0	0	0.908808	0	0.101713	0.560388	0	0.157916
TCONS_00000490	0.545491	3.1194	1.22964	0.784214	1.77297	1.1297	1.44688	2.51904	0.931046	1.68309
TCONS_00004143	0	0	0	0	0	0.553706	0	0	0	0
TCONS_00004144	0.049268	0.074338	0	0.382616	0	0	0	0	0.552862	0
TCONS_00000522	0.075889	0.154788	0.19637	0.713601	0	0.140244	0.702299	0.090195	0.222054	0.248308
TCONS_00004148	1.1377	1.20373	0.605853	0.313629	0	0.3904	0.215118	1.22944	0.414566	0.611525
TCONS_00004157	0	0	0.043918	0	0.013791	0.099102	0	0.012976	0	0.487214
TCONS_00000536	0.008021	0.258355	0.294325	0.079137	1.41279	0.57465	0.248679	2.64757	3.54715	0.357483
TCONS_00004160	0	0	0	0	0	0	0.459638	0	0	0
TCONS_00000545	0.114277	0.072035	0.083897	0	0.502792	0	0.078301	0.205122	0.067789	0.077348
TCONS_00004170	0.313424	0.184484	0.206186	0.307425	0.105852	0.190819	0.051251	0.200615	0.602263	0.206089
TCONS_00004184	0	0	0	0	1.14558	1.02044	0.419387	0.248776	0	0
TCONS_00004186	0.040255	0.702448	0.053537	0.026469	0.466559	0.49083	0.558223	0.29242	0.54984	0.189408
TCONS_00004185	0.717495	0	0	0.769628	0	0.037893	0	0	0	0
TCONS_00004187	0.886811	0.890578	0.225837	0.43232	0.795526	0.711609	0.585826	0.783378	0.76363	0.660195
TCONS_00004188	0.750502	0.750574	1.04285	1.39009	1.21791	1.247	0.279011	0.57639	0.444522	0.972691
TCONS_00004189	0.190625	0.066711	0.927904	1.04002	0.859739	0.983216	0.323818	1.33903	0.91247	0.41697
TCONS_00000555	0	0.33041	0	0.152669	0.007754	0	0.653795	0.230646	0.157502	0
TCONS_00000560	0.090145	0.05313	0	0.055589	0.092185	0	0.352377	0.322265	0	0
TCONS_00000566	0.189206	0.447251	0	0	0	0	4.46744	0	0	0
TCONS_00004211	0.082645	0.195359	0.105014	0.019602	0.484357	0.083184	0	0.055629	0.115878	0.146837
TCONS_00004212	0.394875	0	0	0.35908	0.137624	0.47482	0	0.325113	0.060677	0
TCONS_00000575	0.602213	1.60874	1.58892	1.03295	1.50794	2.26989	1.25538	2.19232	0.548187	1.73783
TCONS_00000577	0.094873	0.201309	0.1583	0.265453	0.26739	0.278651	0.123117	0.600041	0.128334	0.092592
TCONS_00000574	3.81705	4.2751	5.5302	4.49556	7.28043	8.79124	4.74873	6.07992	3.77659	4.02242
TCONS_00004217	0	0	0.170576	0.211308	0.430973	0	0.0982	0.279199	0.349354	0
TCONS_00000596	0	0	0	0.271255	0.12976	0	0.479645	0	0	0
TCONS_00000595	0.280445	0.281936	0.132087	0.395058	0.159337	0.311598	0.503758	0.450901	0.506369	0.637767
TCONS_00000598	0.431454	0	1.74632	0	0.037619	0	0	0	0.297525	0
TCONS_00004266	0.038661	0	0	0	0	0.469009	0	0	0.240005	0
TCONS_00004274	0.073514	0.0689	0	0.170242	0	0.01125	0	0	0.432937	0
TCONS_00004275	0.10269	0.434994	0.113086	0.431983	0.051811	0	0	0	0.144548	0.238055
TCONS_00000623	0	0	0	0	0	0	0.684286	0	0	0
TCONS_00000624	0.078358	0.037169	0.735634	0	0	0.182883	0	0.281062	0	0.095784
TCONS_00004262	0.295386	0.336053	0	0	0	0.068896	0.742747	0.399782	0	0.06014
TCONS_00004284	0.11721	0	0	0	0	1.87471	1.24122	1.61563	0	0
TCONS_00000632	0.095571	0	0	0	0.015716	0	0.017696	0.100778	1.24744	0.289759
TCONS_00000633	0.122484	0.413175	0.678787	0	0.312841	0.02605	0.212928	0.062815	1.17578	0
TCONS_00004279	0.230111	0	0.320502	0	0.181127	0.569183	0	0.136668	0	0.238057
TCONS_00004278	0.20705	0.233298	0.06195	0.23643	0.104976	0	0.275469	0.203333	0.392906	0.136184
TCONS_00004280	2.33468	2.36232	2.34521	2.21932	1.46396	1.13551	1.03991	3.41525	3.51653	1.62934
TCONS_00004362	0	0	0	0	0	0	0	0.442775	0	0
TCONS_00004360	16.0378	6.10284	3.57952	2.99663	0	13.17	1.42809	16.8594	5.59352	0.189835
TCONS_00000635	0	0	0.700523	0.381673	0	0	0	0	0.113583	0
TCONS_00004294	0	0.055847	0.097259	0.499258	0.049246	0	0	0	0	0.15048
TCONS_00004299	0	0	0	1.81048	0	0.372821	0.269802	1.81368	0	0
TCONS_00004306	0	0.659997	0	0.243142	0.089226	0.614302	0.442999	0.59461	0	0
TCONS_00004309	0	0.272923	0.51734	0	0	0.594984	1.23085	0	0	0.730451
TCONS_00004316	0	0	1.19399	0	0.883541	0	0.041186	0	0	0
TCONS_00004317	0	0	0	0	0.158607	0	2.81424	0	0	0
TCONS_00004321	0	0	0	0	0.452345	0	0	0	0	0
TCONS_00004327	0	0.159762	0.087965	0.096368	0	0.316949	0.148568	0.028829	0.028678	0.499413
TCONS_00004328	0	0.683325	0.379775	0	0	0	0.62288	0.015703	0	0
TCONS_00000644	0	0	0	0	0	0.04074	0	0	0.725855	0
TCONS_00004332	0	0	0	0	0.930922	0	0	0	0	0
TCONS_00004335	0	0	0	0	0.574511	0	0	0	0	0
TCONS_00004337	0	0	0	0	0.9925	0	0.624357	0	0	0.005451
TCONS_00000654	0	0	0	0	0	0	0	0	0.478512	0
TCONS_00004342	0	0.513348	0.123863	0.195266	0.33105	0	0	0.310235	0.428755	0.216107
TCONS_00000656	0	0	0	0	0	0	0.450308	0	0	0
TCONS_00000657	0	0	0	0	0	0	0.622127	0	0	0
TCONS_00004343	0	0.207763	0	0	0	0.236494	6.44052	0	0	0
TCONS_00004293	1.51709	0	0.419487	0.761845	0	0.265828	0	0	0.136032	0.077348
TCONS_00004300	0.132787	0	0	0.189727	0	0.232413	0.714094	0.557309	0.066529	0
TCONS_00004318	1.54076	0	0.163679	0.217797	0	0	0	0	0	0
TCONS_00004319	0.274093	0	0	0	0.91747	0	0	0	0	0
TCONS_00004322	0.176135	0	0	0	0.669643	0	0	0	0	0
TCONS_00004323	0.074039	0	0	0	0.48989	0	0	0	0	0
TCONS_00004325	0.259382	0	0	0	0.86473	0	0.050721	0	0	0
TCONS_00004326	0.199433	0	1.05395	1.85705	0.557135	0.136855	0.050902	0.46477	0	0
TCONS_00004331	1.81363	0	0.774387	0	0.69801	0.454582	0	0.010645	0	0
TCONS_00000647	2.46813	0	0.098	0	0	0.212381	0	1.4772	0.051469	0.394393
TCONS_00000637	0.965302	0	0	0	0	0	0	0	0	0
TCONS_00000649	1.49538	0	0	0	0	0	0	0.002286	0	0.489593
TCONS_00000643	0.291277	0.09058	0.078409	0.097092	1.08429	0.33878	0	0	0.606194	0.393641
TCONS_00000646	0.232507	0	0.220961	0	0	0	0.41523	0.34677	0.393367	0
TCONS_00000639	0.1682	0.782268	0.18046	0.279686	0.503788	0.005684	0.636187	0.010965	0.269002	0.318685
TCONS_00000642	0.005726	0.09953	1.3013	0.001498	0.02002	0.034848	0.44507	0	1.16981	0
TCONS_00004333	0.458812	0	0	0.058701	0	0	0.006053	0.078937	0	0.525838
TCONS_00004336	0.070096	0.095485	0	0.041125	0.523885	0.211418	0.095525	0.040764	0.318201	0.152259
TCONS_00004338	0.61243	0	0	0	0.58577	0	0	0.074054	0.122285	0.588084
TCONS_00000652	0.229919	0	0.87636	0.429393	0	0.274132	1.06716	1.48542	0.845904	0
TCONS_00000653	0.34544	0.012161	0.352935	0.101809	0.026131	0.613071	1.04213	1.71176	0.55949	0
TCONS_00004339	0.408743	0.043165	0.436976	0.052081	1.18833	0.732991	0.108371	0.119224	0.161056	0
TCONS_00004340	1.22452	0.38095	0.723545	0.611573	0.104944	0.554311	0.576892	0.168742	1.30689	0.524416
TCONS_00004347	0.175814	0.067272	0	0.034151	0	0	0.036562	0.29926	0.475544	0.274488
TCONS_00004349	0.195928	0.231818	0.129972	0.060527	0.108369	0.058246	0.042164	0.534088	0.897089	0.12375
TCONS_00004351	12.4084	8.12401	9.3336	7.02923	7.97499	8.33638	7.65762	7.79148	8.07068	6.94032
TCONS_00000669	0	0	0	0.391013	0	0	0.188443	0.530223	0.35202	0
TCONS_00004372	0	2.43746	0.160826	0.029328	0.051682	0.004873	0.397392	0	0.026718	0.060767
TCONS_00004374	0	0.133916	0.871586	0	0	0	0.155269	0	0	0
TCONS_00000674	0	0	0	0	0	0	0.462107	0	0	0
TCONS_00000675	0	0.072355	0	0	0	0.113659	0	0.224131	0.415448	0
TCONS_00004393	0	0	0.284509	0	0.213676	0.349648	0	0.580848	0.082432	0
TCONS_00004392	0.369164	0.581918	0.184089	0.928367	0.120726	0.198718	0.363351	0.432853	0.132157	0.149114
TCONS_00000693	1.03884	0	0	0.078739	0	0	0	0	0	0
TCONS_00000692	0.955881	0	0	0.029141	0	0	0	0	0.090015	0
TCONS_00000691	0.991096	0	0	0.431161	0.005548	0	0	0	0	0
TCONS_00000695	0.497547	0	0.01382	0.517577	0	0.016587	0	0	0.049399	0
TCONS_00000694	0	0	0.53049	0	0	0	0	0	0.430308	0
TCONS_00004400	0.112529	0	0.204619	0.095367	0	0	0	0	0	4.01967
TCONS_00004399	0.089472	0	0	0	0	0	0.466743	0	0	0
TCONS_00000698	0	0.052743	0	0	0.123908	0.040657	0	0	0.497999	0
TCONS_00000710	0.057495	0	0	0	0.320688	1.44124	0.023605	0.013834	0	0
TCONS_00000714	0.23885	0.216835	0.193643	0	0.16672	0.511294	0	0.098633	0.181397	0
TCONS_00000715	0.282274	0.024305	0	0	0.117262	0.247078	0	0.456612	0.029444	0.006401
TCONS_00004413	0.180605	0.071438	0.895004	0	0.076445	0	0	0	0	0
TCONS_00004415	0.167375	0	0	0	0	0	0.174141	0.554075	0	0
TCONS_00004417	15.0724	0	0.117042	0.106282	0	0.123615	0	0	0	0
TCONS_00000726	0	0.166789	0.557671	0	0.157759	0	0.130118	0.203761	0.106998	0
TCONS_00000727	0.273511	0.461984	0.481561	0.156475	0.497084	0.190488	0.224438	0.294959	0.341011	0.278057
TCONS_00000732	0	0	0.097456	0	0	0	0.464058	0	0.429974	0
TCONS_00004437	0	0	0.463394	0	0	0	0.10658	1.42707	0	0
TCONS_00004439	0.120146	0	0	0	0	1.0596	0.173679	0	0	0
TCONS_00004441	0.133816	0	0.215151	0.868468	0	1.16211	0.811451	0	0	0
TCONS_00004431	0	0	0	0	0	0	0	0	0.434962	0
TCONS_00004434	0	0.123633	0	0	0.069456	0	0.459585	0.12362	0	0
TCONS_00004433	0.445286	0.129818	0.236193	0	0	0	0.261627	0	0	0
TCONS_00000745	0.671686	0.952746	0.937268	1.05048	0.895922	1.36471	0.805785	0.745761	0.520459	0.378941
TCONS_00004435	0.009092	0.805937	0	0	0	0	0	0	0	0
TCONS_00004443	0	0	0.060691	0.003514	0	0.068549	0.297655	0.367708	0.125116	0.036146
TCONS_00004442	0.168335	0.042005	0.089383	0	0.182957	0.22766	0.15692	0.120689	0.385254	0
TCONS_00004449	0.144006	0	0.173952	0.584454	0.349676	0.172086	0.89292	0.550527	0.211535	0.4453
TCONS_00004453	0.878957	0.717857	0.55789	0.416839	0.315518	5.38333	0.254929	1.14174	0.522491	0.359289
TCONS_00004461	0.113274	0	0	0.453097	0	0	0.038807	0	0	0.046768
TCONS_00004463	0.235825	0.376747	0.268726	0.420155	0.188745	0.548241	0.412772	0.268466	0.34533	0.19558
TCONS_00004475	0	0.042669	0	0	0	0.052838	0.138362	0.547838	0	0.138061
TCONS_00004503	0.038465	0	0	0.152639	0.461456	0	0	0	0	0
TCONS_00004493	0	0	0	0.700187	1.24242	0.679872	0.394622	0.462031	0	0.337375
TCONS_00000833	0.734762	0.181377	0.106061	0.582574	0.697435	0.63036	0.264507	0.206866	0.060837	0.715019
TCONS_00000831	0.690075	0.240904	0.100808	0.275068	0.687552	0.238734	0.324381	0.218459	0.008636	0.434419
TCONS_00000832	0.615182	0.115943	0	0.828386	0.438437	0.941503	0.242107	0.524808	0	0.455149
TCONS_00000830	0.550478	0.480301	0.202069	0.418363	0.787546	1.04183	0	0.411702	0	1.08516
TCONS_00000834	0.538148	0.180113	0.024699	0.527552	0.201134	0.576749	0.553371	0.151265	0.05723	0.549533
TCONS_00004499	0.311006	0.119325	0	0.734064	0.357923	1.21947	0.363928	0	0.18421	0.401397
TCONS_00004498	1.10088	0.13506	0.294475	0.201995	0.204221	0.832353	0.396926	0.287901	0	0.637698
TCONS_00004501	0.575573	0.110092	0.108062	0.598661	1.54702	1.28632	0.539526	0.357895	0.108955	1.11748
TCONS_00004497	0.484148	0.045992	0	0.47975	0.344263	0.278376	0.470617	0.071761	0	0.401566
TCONS_00004494	0.416309	0.182238	0	0.955326	0.048948	0.502137	0.279968	0	0.028678	0.206114
TCONS_00004495	0.19759	0.093923	0	0.335083	0.657498	0.618293	0.381486	0	0.011085	0.247249
TCONS_00004500	0.19733	0.026728	0.090446	0.368454	0.971461	0.219958	0.67741	0.291752	0.032123	0.647799
TCONS_00000840	0	0	0	0	0.437642	0	0	0	0	0
TCONS_00000841	0.491935	0	0	0	0.598015	0	0	0	0	0
TCONS_00000850	0.404591	0.254668	0.286652	0.677862	0	0.155364	0.692979	0.304184	0.060518	0.410403
TCONS_00000852	0.191422	0.09586	0	0.306207	0.17351	0.119115	0.352862	0.09253	0.367567	0
TCONS_00004516	0.186811	0.529907	0.411446	0.188367	0.09457	0.108276	0.432002	0	0	0
TCONS_00000861	0.349008	2.20639	9.81258	0.063456	0.557811	0.270617	3.14094	0.254948	37.6562	0.189838
TCONS_00004520	0.064478	0	0.52669	0	0	0	0.101953	0	0	0
TCONS_00004523	0.641211	0.769984	0.046552	0.095469	0.036188	0.22484	0.295341	0.447165	0.189759	0.107535
TCONS_00000869	0.182138	0.172986	0.739405	0.120748	0.278364	0.675719	0.156486	0.08155	0.434832	0.092872
TCONS_00004525	0	0	0	0	0	0	0.581442	0	0.060247	0
TCONS_00000873	0.215147	0.767793	0	0.306762	0.442314	0.41169	0.25166	0.245199	0.183076	0.143317
TCONS_00000879	0.774603	0.805043	1.32826	1.87243	1.80886	1.57793	1.64554	1.22774	0.589924	0.818175
TCONS_00004540	0.010267	0.021191	0	0	0.690628	0	0	0	0	0.110464
TCONS_00004546	0.222281	0	0.13303	0.063691	0	0.03457	0.065678	0	0.338136	0.064663
TCONS_00000887	0.095841	0	0	0.100885	0	0.469352	0.304151	0	0.084964	0
TCONS_00004545	0.586968	0	0.124251	0	0	0.089509	0	0	0.14207	0
TCONS_00000890	0.108163	0	0	0	0	0.508344	0	0	0	0
TCONS_00000889	0	0.049754	0	0.456559	0.117915	0.135005	0.119299	0	0.103283	0.472564
TCONS_00000888	0.139842	0.368	0	0.263989	0.071569	0.224414	0.303222	0	0.185617	0.215661
TCONS_00000898	0.317429	0.565275	0.261394	0.655761	0.172747	0.955753	0.426016	0.094909	0	0.643471
TCONS_00004555	0	0.508854	0	0	0	0	0.386348	0	0.120317	0
TCONS_00000903	0	0	0	0	0	0	1.25481	0	0	0
TCONS_00000902	0.60472	0.30376	0	0	0.490592	0.768732	0	0.17337	0.112432	0
TCONS_00004563	0.847952	1.07425	0.95665	0.694366	0.840132	0.55198	1.19926	0.815793	0.630739	1.67583
TCONS_00000910	0	0	0	0	0	0	0	0.413759	0	0
TCONS_00000905	0	0	1.35011	0	0	0.267605	0.237001	0	0	0.193275
TCONS_00000904	1.72884	0.437059	0.300135	0.266557	0.55544	1.72649	1.56207	0.878344	0	1.34359
TCONS_00000912	0	0	0	0.018881	0	0.462212	0.831669	0.025822	0	0.099498
TCONS_00000913	0.115504	0.459308	0.178315	0	0	0	0	0	0	0.048222
TCONS_00000914	0.128331	0.094039	0	0.181267	0	0.277374	0.119806	0.103657	0.071607	0.488587
TCONS_00004589	0.259819	0.5977	1.64661	0.366542	0.738395	0.486707	0.978984	0.418175	0.382308	0.349386
TCONS_00000936	0	0	0	0	0	0	1.03688	0	0	0
TCONS_00004597	0.226178	0	0.113765	0	0.170137	0	0.357139	0.421433	0	0.053236
TCONS_00004591	0	0	0	0.459139	0.065298	0	0	0.206034	0	0
TCONS_00004592	0	0.133199	0.492489	0.025342	0.102975	0.066319	0	0.038464	0	0.210372
TCONS_00004598	0	0	0	0	0	0	0	0	0	0.690022
TCONS_00004599	0	0	0	0	0	0.924263	0.123419	0.0943	0	0
TCONS_00004600	0	0	0	0	0	0	0.080848	0	0.104114	0.502636
TCONS_00000937	0	0	0	0	0	0	0.614921	0	0	0
TCONS_00004601	0.458388	0.186792	0.080177	0.401308	0.292679	0.134172	0.384932	0.406388	0.057812	0.540149
TCONS_00004602	0.164239	0.191399	0	0.451657	0.134447	0.069883	0.444371	0.515167	0.072948	0.205931
TCONS_00004603	0.016128	0	0.103684	0.173485	0	0.164768	0.672002	0.410373	0	0.220388
TCONS_00004612	0	0	0.549746	0.179239	0.261293	0.291485	1.02167	0.154827	0.333084	0.093165
TCONS_00004614	0	0	0	0	0	0.715028	0.128512	0.420916	0.35364	0.154429
TCONS_00004616	0	0	0	0.081472	0.025661	0.024454	0.628015	0.11408	0.311311	0
TCONS_00004618	0	0	0	0	0	0	0.085397	0.648758	0	0
TCONS_00004613	0.218551	0	0.651948	0.139616	0.119277	0	0	0	0	0
TCONS_00000981	1.37355	1.70219	0.71679	0	0	0.621465	0.139507	0.015365	0.022347	0.008939
TCONS_00000948	0.610638	0.088538	0.036478	0	0.141614	0	0.036331	0.093177	0.015675	0
TCONS_00004615	0.085898	0.144209	0.047379	0.188593	0.41807	0.398183	0.217964	0.119063	0.578564	0.178159
TCONS_00004627	0	0	0	0	0	0	0	0.410245	0	0
TCONS_00001021	0.221003	0	0.116838	0.1094	0	0	0	0	0.168706	0.442791
TCONS_00001022	0.266986	0.155611	0.110317	0.067082	0.4434	0.078022	0.138351	0.090307	0	0.200005
TCONS_00001025	0	0.677068	0.073492	0	0	0.032341	0.228174	0.083851	0.133458	0.900452
TCONS_00004633	0.127854	0	0.504527	1.28259	0.450688	0	0.06417	0	0.171218	0
TCONS_00001024	0.296961	0	0	0.362352	0	0	0	0	0	0.723585
TCONS_00004631	3.20892	0	0	2.78737	0.493403	0	1.31628	1.16957	0	0
TCONS_00004632	5.47081	0.393538	3.5695	7.72936	3.3378	5.94206	3.0571	5.26939	4.77407	4.92748
TCONS_00001038	0	0	0.061371	0.499064	0	0	0	0.170202	0	0
TCONS_00001039	0	0	0	0.581817	0.165154	0	0	0	0	0
TCONS_00004652	0.354	0	0	0	0.439961	0.139675	0.104094	0	0.002583	0
TCONS_00004658	0.478492	0	0	0	0	0	0	0	0	0
TCONS_00001046	0.426885	0	0.07835	0	0.433653	0	0.731242	0	0	0
TCONS_00001052	0.137011	0.128253	0	0.599651	0.069592	0.398389	0	0	0	0.034776
TCONS_00004670	0.09903	0.033517	0.324689	0.15811	0.171477	0.785321	0.131275	0.908973	0.011051	0.170235
TCONS_00001054	0	0	0	0	0	0.531655	0	0	0	0
TCONS_00004669	0.12812	0.027772	0	0	0	0	0	0.160434	0.406894	0.15424
TCONS_00001050	0	0	0.106774	0	0.066253	0	0.5854	0	0	0.059987
TCONS_00001049	0.022626	0.313076	0.153145	0	0	0	0	0.297164	0.591214	0.168082
TCONS_00001058	0.466745	0	0.051971	0	0	0	0.055433	0	0	0
TCONS_00004675	0.973085	0.088	0.298704	0.09842	0.342197	0.178818	0.085961	0.071973	0.377226	0.158427
TCONS_00004676	0.18179	0.099728	0.287662	0.118535	0.417998	0.591473	0.17113	0.100523	0.310757	0.226601
TCONS_00004677	0.379862	0	0.287666	0.282229	0.264751	0.278076	0.169857	0.020226	0.455513	0.104029
TCONS_00001057	0.450035	0	0	0.307544	0	0.504095	0.23249	0	0	0
TCONS_00004693	0.291189	0.243046	0.22667	0	0.445442	0	0.056647	0	0.130636	0.146084
TCONS_00004694	0.311581	0.158762	0.267002	0.034274	0.052636	0.201331	0.176842	0.279948	0.061816	0.105446
TCONS_00001091	0.017408	0.131861	1.04949	0	0.045179	0.108996	0.127986	0.163221	0	0.077985
TCONS_00004722	0.236574	0.340323	0.482112	0.352426	0.273256	0.512556	0.430071	0.587472	0.578245	0.447413
TCONS_00001100	0.533928	0	0.147364	0	0	0.31128	0	0.239394	0.119468	0
TCONS_00004725	0.696091	0.272994	0.895776	0.231503	0.138564	0.640286	0.543619	0.681285	0.48657	0.349076
TCONS_00001098	0	0	0.101277	0.103721	0	0.11179	0	0.465438	0.021915	0.02773
TCONS_00001097	0.147864	0.250533	0.491779	0.07294	0.075608	0.160436	0.109644	0.038219	0.109417	0
TCONS_00001099	0.774143	0.246466	0	0.523069	0.487082	0.605334	0.057344	0.234722	0	0.132764
TCONS_00004730	0.773269	0	0.065073	1.06974	0.265982	1.11504	0.12827	0.279792	0	0
TCONS_00001119	0.232507	0.016408	0.410569	0.066882	0	0.054598	0.208033	0.018251	0.182764	0.61939
TCONS_00001120	0	0	0	0	0.51736	0	0	0.044369	0	0.021634
TCONS_00001122	1.4158	1.48804	0.617836	1.1525	1.539	1.13996	1.48214	1.16673	1.09826	1.13031
TCONS_00001124	0.532966	0.344701	0.296631	0.252101	0.894949	0.309613	0.166785	0.39823	0.491682	0.216994
TCONS_00001123	4.33697	0	0.034684	0.488605	6.03871	2.14731	0.258319	1.4254	2.13177	1.55134
TCONS_00001134	0.197526	0	0	0	0.056853	0	0	0.309642	0	0
TCONS_00004758	0.200725	0.31632	0	0	0.337126	0	0.206301	0.057647	0.282542	0.06793
TCONS_00004760	0	0.382054	0	0	0	0	0	0	0	0
TCONS_00004759	0.165217	0.281374	0.475911	0.253605	0.434775	0.916275	0.037812	0	0.061311	0.179786
TCONS_00001161	0.008656	0.277461	0.517655	0.598906	0	0	0.332042	0	0	0
TCONS_00004769	0	0	0	0.632487	0	0	0	0	0	0
TCONS_00001166	0.023425	0.539896	0.191543	0	0.165537	0	0	0.305372	0	0.327374
TCONS_00004779	0.949147	1.01294	0.159335	0.262649	0.123524	0.716125	0.246568	0.359757	0.408761	0.368125
TCONS_00001168	0.082346	0	0	0	0.252643	0.724601	0.085488	0	0	0
TCONS_00001169	0.274044	0	0	0	0	0	0.675978	0	0	0
TCONS_00001172	0.020908	0.039539	0.301333	0.208801	0.457224	0.892016	0.116459	0.037655	0	0.149304
TCONS_00001175	0.279873	0.023969	0	0	0.104045	0.55229	0.235539	0.319587	0.130628	0.282763
TCONS_00001177	0	0.295939	0	0.137556	0.070812	0.161611	0.064479	0	0.548895	0.100725
TCONS_00004789	0	0	0	0	0.472309	0	0	0	0	0
TCONS_00004791	0	0	0	0.480494	0	0	0.145684	0	0	0
TCONS_00004792	0	0	0	0	0	0.169231	0.448632	0	0	0
TCONS_00004801	0.117393	4.12622	0.492119	2.50752	0.712348	2.65887	0.117437	0.209312	0	3.95855
TCONS_00001199	0	1.81884	0.179251	0	0	0	0.167295	0.09739	0	0
TCONS_00004804	0.291585	0.011305	0.014513	0.191308	0.047128	0.013721	0.176469	0	0	0
TCONS_00004805	0.671152	0	0.082721	0.188103	0.037707	0.065634	0.1932	0.067527	0.06695	0.076008
TCONS_00004794	0	0	1.44312	0	0	0	0	0	0	0.21736
TCONS_00004795	0	0	1.56465	0	0	0	0.156536	0	0	0.222696
TCONS_00001186	0	0	0.52669	0	0	0	0	0	0	0
TCONS_00001181	0.227792	0.175405	0.172615	0.985912	0	0	0.421782	0	0	0
TCONS_00001187	0.642743	0	0.38608	0.116862	0	0	0	0	0	0
TCONS_00001184	0.543355	0.013595	0	0	0	0	0	0	0	0
TCONS_00001185	0.317813	0.675649	0	0.204163	0	0	0	0	0.204144	0
TCONS_00001183	0.297832	0.109605	0.484999	0.354555	0.164387	0.013482	0.258293	0.176858	0.155233	0.015692
TCONS_00001182	0.289929	0.119274	0.504128	0.132503	0.565282	0	0.156834	0.918251	0.136232	0.402324
TCONS_00001180	0.248887	0.310024	1.17446	0.383711	0	0.126139	0.229357	0	0.127953	0.073242
TCONS_00004797	0.315519	0.237086	2.36312	0.062686	0	0	0.042952	0.007501	0.093274	0.695009
TCONS_00001219	0	0	0	0	0	0	0	0.784144	0	0
TCONS_00004821	0.478667	4.25719	0.112043	0	0.265821	0.861379	1.37609	0	0.926739	1.69262
TCONS_00004830	0	0.353084	0.168267	0.447213	0	0.260074	0	0	0.130425	0
TCONS_00001209	193.818	214.779	275.439	207.012	263.772	202.875	143.93	180.792	254.159	94.1863
TCONS_00001211	0.413747	0.229156	0.518926	0.713581	0.465584	0.448628	0.650484	1.05045	0.305368	0.079504
TCONS_00004815	0.1498	0	0.50893	0	0.133864	0	0	0.206406	0.0173	0
TCONS_00001212	0.080688	0	0	0	0	0	0	0.427654	0.07941	0
TCONS_00001229	0.362248	0.19175	0.065684	0.119092	0.060389	0.207888	0.061303	0	0.10366	0.242023
TCONS_00004841	0	0.091105	0.437557	0.496333	0.121089	0.115533	0.287901	0	0	0
TCONS_00001241	0	0.404498	0.123601	0	0	0.152414	0.543565	0	0.214187	0
TCONS_00001240	0.506653	0.213764	0.098345	0.218055	0.303275	0.205886	0.122448	0.399315	0.273693	0.268031
TCONS_00001242	0.191423	0.220836	0.07991	0	0	0	0.080194	0.080764	0	0.237651
TCONS_00004847	0.147848	0.353911	0.204722	0.063007	0.190116	0.217308	0	0.752752	0.154551	0.189689
TCONS_00004859	0	1.69053	0	0.461723	0.868871	0.609877	1.7614	0.864473	0	0
TCONS_00001249	0.743897	0.198557	0	0.107779	0.333947	0.048276	0.334191	0.016556	0	0
TCONS_00001252	0.672936	0.320345	0	0.629301	0	0	0.018826	0.434863	0	0
TCONS_00004857	0.15753	0.413113	0.008765	0.600544	0.667565	0.771245	1.01965	0.362472	0	0
TCONS_00004855	0.115299	0.426488	0	0.524488	0.709644	0.333731	1.04402	0.165238	0	0
TCONS_00004858	0.401368	0.137608	0.013518	0.443148	0.422397	0.1136	0.65164	0.178625	0	0.00997
TCONS_00001257	0.419136	0.803305	0.124802	1.07598	0.811881	0.22088	0.69807	0.73711	0.068369	0.069139
TCONS_00004860	0.0743	0	0	0	0	0	0.881131	0	0	0
TCONS_00001263	0	0.002945	0	0	0	0	0.751886	0	0.247533	0
TCONS_00001265	0	0.275162	0	0	0	0	0	0	0.131886	0
TCONS_00001266	0	0.150313	0.186133	0	0	0	0.133112	0.546537	0	0
TCONS_00001267	0	0.047097	0.31004	0.104986	0	0.084661	0.146662	0.507233	0.100082	0.155975
TCONS_00001264	0.167501	0.644266	0.617025	0.696003	0.169871	1.05796	0.800965	0.903903	0.824142	0.311725
TCONS_00001269	0	0.080186	0	0	0	0	0	0	0	0
TCONS_00001261	0.261377	0.981372	0.172475	0.051515	0.259902	0.302798	0.533014	0.143665	0.671348	0.209907
TCONS_00004875	0	0	0	0.104002	0	0.121368	0	0.468259	0.186322	0.199172
TCONS_00004878	0.208105	0.246168	0	0.155862	0.687461	0	0.321098	0	0.300613	0
TCONS_00001286	0	0	0	0	0	0.522409	0	0.033592	0	0
TCONS_00001289	0.233373	0.294216	0	0.453261	0.14119	0	0	0	0.012964	0.076872
TCONS_00004888	0	0.191474	0.30806	0	0.219357	0.28895	0	0.249713	0.249157	0
TCONS_00004889	0	0	0	0	0	0.090206	0	0.41346	0	0
TCONS_00004890	0	0.001486	0.012904	0.067344	0.003213	0.048093	0	0.445109	0.011802	0
TCONS_00004887	0.507308	0.539491	0.050788	0.052114	0.140257	0.10728	0.198191	0.105546	0.041174	0.09349
TCONS_00001305	0	0.446025	0.013853	0	0.222028	0.024689	0.222211	0.236375	0.196531	0
TCONS_00001300	0.677025	0.355631	0.61066	0.112919	0.297505	0.592064	0.366054	0.383582	0.373889	0.435202
TCONS_00001304	0.490345	0	0	0.008183	0.199513	0.017894	0.296729	0.157463	0.111811	0.089397
TCONS_00001303	0.228301	0.3238	0.374607	0.444616	0.173554	0.463136	0.277703	0.051224	0.099873	0.115893
TCONS_00001302	0.127572	0.885695	0	0	0	0	0.548303	0.150122	0.202698	0
TCONS_00001299	0	0.313728	0.07135	0.033628	0.204969	0.743141	0.069125	0.108651	0	0.068283
TCONS_00001310	0.443375	0	0.122065	0.110844	0	0	0.35544	0.122029	0.145139	0.196562
TCONS_00004899	0.144283	0.269665	0.317779	0.144282	0.432137	0.50288	0	0.290922	0.386436	0.219239
TCONS_00001326	0.003409	0	0	0	0	0	0.515113	0	0	0
TCONS_00001322	0.563387	0	0.116714	0.049087	0	0.451119	0.057713	0.217604	0	0.270703
TCONS_00004905	0.287614	0.637631	0	0	0	0.426684	0.898209	0	0	0.311372
TCONS_00004913	0.327212	0.315836	0.231966	0.940546	0.707339	0.211912	0.359747	0.461487	0.107899	0.138632
TCONS_00004916	0.369611	0.333932	0.372825	0.529965	0.294241	0.316636	0.462241	0.85399	0.445794	0.390857
TCONS_00004922	0.393099	0.517885	0.519475	0.543	0.162927	0.091442	0.121206	0.388078	0	0.23946
TCONS_00004920	0	0.212475	0.47889	0.104555	0.341711	0.1813	0.871437	0.185182	0.09226	0.061613
TCONS_00004921	0.191108	0.28475	1.09546	0.009014	0.482596	0	0.12554	0.478139	0.05875	0.067726
TCONS_00001348	0.163115	0.121589	0.092191	0	0.402417	0.360864	0.036368	0.217652	0	0.784653
TCONS_00004923	0	0	0	0.100988	0	0	0.446119	0.096741	0.09688	0
TCONS_00004924	0.463257	0.323773	0.254228	0.231628	0.114905	0	0.118635	0.444867	0.051698	0.352746
TCONS_00001354	0.213879	0	0.323135	0.15333	0.282949	0.536079	0.311298	0.09044	0.115863	0.875164
TCONS_00001357	0.067076	0.170348	0.059808	0.043864	0.00211	0.060189	0.010615	0.022569	0.041807	0.038824
TCONS_00001356	0.237818	0.103325	0.237599	0.54828	0.108756	0.109474	0.346859	0.081802	0.047374	0.661038
TCONS_00004930	0	0	0.605133	0	0	0	0.16943	0	0	0
TCONS_00004931	0	0.129484	0.291613	0.108973	0	0.635414	0	0.289817	0	0
TCONS_00001383	0	0	0.859249	0.629636	0	0	0	0.59574	0.696344	0.726224
TCONS_00001384	0	0	0.064347	0.876467	0	0	0	0.421274	0.156498	0.104013
TCONS_00001385	0	0.430306	0	0.135011	0	0	0	0.425456	0	0
TCONS_00001387	0	0.038762	0.469807	1.10385	0	0	0.041993	0.488717	0.180067	0.207963
TCONS_00004945	0	0.007777	0	0	0	0	0	0	0.589406	0
TCONS_00004944	0.158689	0.300091	0.291257	0.317377	0.161204	0.046142	0.108188	0.051746	0.208496	0.010472
TCONS_00001396	0.248284	0.116201	0	0	0.152093	0	0.150032	0.503888	0	0.028501
TCONS_00001404	0.204492	0.066361	0.500432	0.169652	0.13336	0	0.145824	0	0.09827	0
TCONS_00001408	0.109426	0	0	0	0	0	0.027717	0.415171	0.097693	0
TCONS_00001411	0.306186	0.080259	0.492429	0.03789	0	0.388848	0	0.150025	0.102477	0
TCONS_00001412	0.166341	0	0	0	0	0	0.4499	0	0.332182	0
TCONS_00004955	0	2.03315	0.076271	1.69458	0	0.112927	0.014192	0.118218	0	0.047097
TCONS_00001415	0.061207	0.160603	0.173168	0	0.438278	0	0.234754	0	0.045648	0
TCONS_00004950	0.145688	0	0.39778	0.632118	0.183163	0.053915	0.464058	0.242594	0	0.239899
TCONS_00001428	0	0	0.185831	0.205103	0	0	0.079667	0.542378	0	0
TCONS_00001431	0	0.045918	0	0	0	0	0	0.509802	0	0.074703
TCONS_00004962	0	0	0	0	0	0	0	0.458987	0	0
TCONS_00001427	0.071628	0	0.176809	0	0	0	0.748679	0	0	0.07821
TCONS_00001430	0.069991	0	0	0.139515	0	0	0.681946	0	0.146634	0.108484
TCONS_00001432	0.464168	0	0	0	0	0.077419	0.017331	0	0.224631	0
TCONS_00001433	0.595998	0	0	0	0	0	0	0	0	0
TCONS_00004969	0.646749	0	0	0	0	0	0.218598	0.762672	0.80733	0
TCONS_00001450	0.065884	0.553393	0.598572	0	0.100393	0.114943	0.067714	0.116682	0.011764	0.131996
TCONS_00004981	0.116502	0	0.02771	0.184821	0	0.057266	0.763028	0.863227	0	0
TCONS_00001451	0.184127	9.68537	1.6829	0.667117	0.160909	1.34092	0.209796	3.00531	0.031679	1.13325
TCONS_00001454	0.085329	0	0	0.67641	0	0.013668	0	0	0.152089	0.034452
TCONS_00004986	0	0	0	0.543717	0.194545	0	0	0	0	0
TCONS_00001455	0.15993	0	0.357003	0	0	0.125684	0	0.096983	0.894702	0
TCONS_00004987	0.20248	0	0.22753	0.103306	0	0	0	0.602649	0.459302	0
TCONS_00001457	1.42312	3.52564	2.09334	1.60045	3.43791	0.158714	0.188256	0.128771	3.33811	0.872168
TCONS_00004970	0	0	0	0	0	0	0	0	0	0.468675
TCONS_00001444	0	0	0	0	0.480504	0	0	0	0.481357	0.084739
TCONS_00001445	0	0	0	0	0.201455	0	0	0	0.337191	0.098004
TCONS_00001447	0	0	0	0	0.840456	0	0	0	0.100933	0
TCONS_00001449	0	0	0	0	0	0	0.462702	0	0	0.133185
TCONS_00004971	0.228554	0.572439	0	0	0	0	0	0.866528	0	0
TCONS_00004999	0.054148	0	0.602994	0.00365	0.092707	0	0.184464	0.247896	0	0
TCONS_00005005	0.469574	0	0	0	0	0	0	0	0	0
TCONS_00005009	0	0	0	0	0	0	0.048406	0.404677	0	0
TCONS_00001489	0	0	0	0	0	0	0	0	0.666101	0
TCONS_00005010	0	0.803486	0	0	0	0	0	0	0	0
TCONS_00005027	0	0	0	0.146507	0.096676	0	0.058558	0.472005	0	0
TCONS_00001496	0	0.105485	0	0	0	0	0.343984	0.500623	0.146412	0.113265
TCONS_00001503	0.055694	0.458201	0.229365	0.109231	0.564215	0.261626	0	0.378837	0.123964	0
TCONS_00001509	0.31844	0	0	0	0	0	0	0.528225	0.091563	0.261762
TCONS_00001508	0.419682	0.029711	0	0	0.06559	0.033543	0.056185	0.493323	0	0.065552
TCONS_00005050	0.104366	0.066372	0.400219	0	0	0.007086	0	0.006181	0.279999	0.086865
TCONS_00005051	0.284054	0.403054	0.125292	0.227547	0.115577	0.129241	0.080685	0.969358	0.151345	0.11397
TCONS_00001532	0.105706	0.144701	0.893711	0	0.284392	0	0	0.066107	0	0
TCONS_00001529	0.00775	0.102505	0.620772	0.205871	0	0.435392	0.934324	0	0.240049	0.093389
TCONS_00005060	0	0	0	0	0.229469	0	0	0.540163	0.128171	0
TCONS_00005076	0.447661	0	0	0	0	0	0	0	0	0.034961
TCONS_00005081	0.117147	0.413108	0.068865	0.240131	0	0	0	0.104763	0	0
TCONS_00005082	0.249011	0.093203	0.063282	0.032283	0.737669	0.333803	0.065475	0.324697	0.056106	0.016388
TCONS_00005092	0.221753	0	0	0	0	0	1.03215	0.214051	0	0
TCONS_00005093	0.128702	0	0	0	0.52472	0.095122	0	0	0	0
TCONS_00005094	0.057222	0	0.888964	0	0	0	0	0.79372	0	0
TCONS_00005097	0.03632	0.553518	0.447513	0	0	1.28516	0.158296	0.225715	0	0
TCONS_00005100	0	0.067088	0.156271	0.314554	0.216231	0.119934	0.328155	0.396502	0.188344	0
TCONS_00005102	0.042548	0.07456	0.048417	0.042548	0	0.586254	0.321853	0	0.037986	0.345579
TCONS_00001586	0.065884	0.168717	0.036156	0	0.628906	0.644577	0.100895	0.191876	0.056271	0.032442
TCONS_00001589	0.079736	0.192131	0.535856	0	0.165136	0.300464	0.077551	0	0.071718	0.12323
TCONS_00001591	0.044376	0.067693	0.618344	0.044671	0.090158	0	0.039223	0.078059	0.25408	0
TCONS_00005124	0.200873	0.09265	0.226605	0.30166	0	0.122108	0	0.376891	0	0.638111
TCONS_00005133	3.13234	0	0	0.532865	0	0.884874	0	0.08665	0.439598	0.223774
TCONS_00001620	0.82835	1.03167	0.126406	0.122868	0.880692	0.220236	0.907234	0.322654	0.082812	0.213172
TCONS_00005150	0.693404	0.221999	0.250369	0	0.352994	0.169763	0.314909	0.751204	0.25922	0
TCONS_00001632	0	0	0	0	0	1.37581	0.040525	0	0	0
TCONS_00005163	0	0	0.256655	0.29029	1.07566	0.481806	0.106126	0	0.065226	0.074175
TCONS_00005164	0	0.063572	0.662304	0.120347	0.732554	0.309179	0	0	0.171623	0.097748
TCONS_00005165	0.781396	0.350424	0.296638	0.332558	0.682085	0.620219	0.64455	0.090677	0.080355	0.328553
TCONS_00001633	0.710823	0	0	0.11847	0.237488	0.004593	0.045458	0	0.208715	0.055328
TCONS_00005172	0	0	0	0	0.48576	0.022303	0	0.659113	0	0
TCONS_00001638	0.567117	0.054612	0.083801	0.182921	0.315055	0.181155	0.0422	0.077877	0.362001	0.166746
TCONS_00005175	0.530795	0	0.160438	0.011716	0.077621	0.257135	0	0.133038	0.068217	0.079128
TCONS_00001642	0	0	0.538887	0	0	0	0	0	0	0
TCONS_00005178	0.4017	0.329078	0.12875	0.588457	0	0.804742	0	0.265186	0.037189	0.010573
TCONS_00001645	0.275981	0	0	0.093237	0	0	0	0	0.832395	0
TCONS_00001646	0	0.158571	0	0	0	0	0	0	0.598892	0
TCONS_00001650	2.72684	0.080732	0.097524	0.486188	0.143366	0.656033	1.83705	2.96132	0.062158	0.053492
TCONS_00005194	0.689168	0.06512	0.075843	0	0	0.080103	0.118918	0.113731	0	0
TCONS_00005192	0.985427	0.465317	1.12225	0.035549	0.941944	0.041071	0.035684	0.582475	0.103147	0.404591
TCONS_00001656	0.484032	0.378044	0.379345	1.8379	0.385996	0.269135	0.447021	0.063101	0.442364	0.136434
TCONS_00001657	0.127539	0.104441	0.05618	0.478269	0.069531	0	0.021847	0.722645	0.214934	0.019854
TCONS_00001655	0.036712	2.19496	0.263087	0.043833	1.22882	0.67737	0.400394	0.018231	0.01606	1.37683
TCONS_00001658	0.092607	5.72618	0.007261	1.21707	0.312504	0.180808	0.084698	1.67177	1.26888	0.467423
TCONS_00001660	0	0.091289	0.158066	0	0.096237	0.099941	0.297691	0.346599	0.227557	0
TCONS_00005199	0.151686	0.259218	0.087327	0.017096	0.014165	0.24334	0.307064	0.009794	0.208166	0.009233
TCONS_00005198	0	0	0	0	0	0	0.499262	0	0	0
TCONS_00005209	0.065613	0	0	0	0.228576	0	0	0	0.230989	0.495125
TCONS_00005208	0	0	0	0	0.150457	0	0	0	0.987857	0.078318
TCONS_00005207	0.566925	0	0	0.209972	0	0	0	0	0.456773	0.319766
TCONS_00005212	0.666427	0.279632	0	0.227679	0.133615	0.256329	0.031228	0	0.759536	0
TCONS_00005203	0	0	0	0	0	0	0.091828	0.626455	0	0.032599
TCONS_00005204	0	0	0	0	0.199702	0	0	0	0	1.00128
TCONS_00005201	0.250998	0.634283	0.437084	0.126897	0.29189	0.17555	0	0.451536	0	0.318396
TCONS_00001681	1.18439	1.16115	0.319396	0.61911	0.146823	0.296437	1.12034	0.290116	3.50277	0.221338
TCONS_00001676	0.027972	0	0.540114	0	0	0	0	0	0.032489	0
TCONS_00001677	0.743505	0.630683	2.43397	0.327387	1.05396	0.872848	0.643233	3.0653	0.632494	0.505778
TCONS_00005232	0.168142	0	0.447598	0	0	0	0	0.033802	0.295796	0.252063
TCONS_00005231	0.134399	0.406009	0.714185	0.220847	0.23312	0.091303	0.218646	0.075619	0.372414	0.19188
TCONS_00001682	0	0	0	0	0	0.537603	0	0	0	0
TCONS_00001683	0	0	0	0	0	0.917207	0	0	0	0
TCONS_00005222	0.163107	1.26235	0	0	0	0	0.167088	0	0	0
TCONS_00005224	1.25618	1.28686	0	0.101445	0	1.32418	0.622841	0.217336	0.113694	0
TCONS_00005225	0.752306	1.04069	0.47453	0.137192	0	0.795495	0.48723	0.109897	0	0
TCONS_00005226	0.750987	1.90578	0	0.418028	0.127707	1.31069	0.532145	0.195688	0.075666	0
TCONS_00005227	0.605277	4.56354	0.563023	0.310448	0	3.32952	0	0.294354	0.059788	0
TCONS_00005223	0.399231	2.08607	0.44811	0.111956	0.428683	1.77541	0.202516	0.181998	0.073884	0.044822
TCONS_00005229	0.010451	0.581638	0.165715	0.531017	0.08096	0.375848	0.18418	0	0.131158	0
TCONS_00005228	0.099333	0.804448	0.109389	0.585402	0	2.40847	0.230389	0.123668	0	0
TCONS_00005238	0	0	0	0.127356	0.109941	0	0.168534	0	0	0.582685
TCONS_00001687	240.131	248.619	297.503	261.773	367.147	358.23	279.573	143.728	353.91	316.626
TCONS_00005237	68.8157	46.8187	108.302	89.8183	47.7757	64.2191	61.8152	40.9618	56.7368	81.5602
TCONS_00005246	0.055877	0.016891	0	0.97658	0	0.018333	0	1.87661	0	0
TCONS_00001691	0.050246	0	0	0.39996	0.007827	0.403241	0	0.171361	0.267358	0.179907
TCONS_00001702	0.081741	100.69	0.093208	0	0	0	0.089374	0.390216	0	0
TCONS_00001699	0.125983	0.478074	0.106445	0.125563	0.319951	0.163625	0.129483	0.221376	0.224575	0.254108
TCONS_00001700	0.925375	1.00743	0.913382	1.2469	0.469553	0.467266	0.316499	0.782597	0.698607	1.499
TCONS_00005252	0	0	0.554951	0.125983	0	0	0	0	0	0
TCONS_00001719	0.933846	0	0	0	0	0	0	0	0	0
TCONS_00005263	0.16423	0.355821	0.081677	0	0.555097	0.321479	0.020419	0.028496	0.068739	0.060599
TCONS_00001756	0.077648	0.76356	0	0	0	0	0	0	0	0
TCONS_00005267	1.31437	1.26112	0.267054	0	0	0.987182	0.619777	0.108821	0	0.123102
TCONS_00001759	0	0	0.362383	0	0	0	0	0	0	0
TCONS_00001760	0	0.003947	0	0	0	0.727398	0	0.032466	0	0
TCONS_00001770	0.200206	0.283952	0	0	0.101012	0.575156	0.19205	0	0	0
TCONS_00005278	0	0	1.0349	0.207199	0.716232	4.44139	0	0	0	0
TCONS_00005280	0	0	1.3142	0.005618	0.31429	2.96799	0	0	0	0
TCONS_00005279	0.127351	0	5.65464	1.15842	1.26369	12.4858	0	0.30581	0.002579	0
TCONS_00005285	0.054334	0	0.484702	0	0.036797	0.76874	1.4841	0.048763	0.048508	0.151591
TCONS_00005305	0.629704	0	0.267369	0.290186	1.30034	0.028126	0.049708	0	0.39494	1.66065
TCONS_00005307	0.715734	0	0	0.242355	0.13904	0	0.036288	0.283623	0.109352	0.009736
TCONS_00001784	0.179829	0.537238	0.069523	0	0	0.391614	0	0.003434	0.161686	0
TCONS_00005319	0	0.209551	0	0.17629	0	0	0	0.790559	0	0.150721
TCONS_00001801	0.249291	64.5128	0.076868	0.109023	0.06348	0.085051	0	0	0	0
TCONS_00005329	0	0	0	0	0.285493	0.080103	0	0	0	0.592083
TCONS_00005330	0	0	0.390155	0.069533	0.126135	0	0	0	0	0.75637
TCONS_00005331	0	0	0	0.484681	0.171624	0.148179	0	0	0	0.274159
TCONS_00001804	0.518446	0	0.350262	0.535293	0.566081	0.222524	0.110584	0.013803	0.204764	0.038356
TCONS_00001806	0.330169	0	0.011312	0.083643	0	0	0	0	0.458527	0
TCONS_00005328	0.24102	0	0	0.270225	0.378462	0.258953	0	0	0	0.131746
TCONS_00001810	0	0	0	0	0	0	1.08021	0	0	0
TCONS_00001808	3.1736	0	0.703802	1.22507	1.91291	0.598271	0	0	0.45785	1.56121
TCONS_00001811	0.703987	0	0	0	0	0	0	0	0	0
TCONS_00001812	0.859704	0.095764	0.242494	0.0633	0.303029	0.408858	8.0518	0.404872	2.26859	0.568803
TCONS_00005332	0.75223	0	0	0	0.312556	0	0	0	0.111929	0
TCONS_00001814	0	0	0.082069	0.05962	0	0.228353	0	0.689138	0	0
TCONS_00005333	0.433306	0.162438	0.042042	0.092133	0.075883	0.034338	0.15368	0.223965	0	0.247932
TCONS_00005334	0.431767	0	0	0	0.293305	0.117353	0.111374	0.259344	0.096314	0.183362
TCONS_00005335	0.405798	0	0	0	0	0	0.626649	0	0	0.205654
TCONS_00001817	3.02438	1.82902	0.709971	0	0.753831	0.09533	1.49653	0.148601	0.504364	1.41911
TCONS_00001827	0.038888	0.077957	0.05826	0.082447	0.580556	0.285442	0.248846	0.584311	0.135682	0
TCONS_00005348	0.592463	0	0	0	0	0	0.460029	0	0	0
TCONS_00001828	0.389214	0.83985	0.209839	0.387078	0.387573	0.437286	0.130854	0.171397	0	0.331827
TCONS_00001825	1.23505	0.774215	0.850996	1.09779	0.720096	1.28005	0	0	0	1.08308
TCONS_00001824	16.9664	17.5248	13.7529	18.3641	26.2376	23.0722	9.75669	7.45821	7.62831	9.96337
TCONS_00005345	0.076374	0.463059	0.663998	0.334975	0.904479	0.480772	0	0.111234	0	0.137396
TCONS_00001834	0	0	0	0	0.013197	0	0.035606	0	2.28718	0
TCONS_00005368	0	0.324877	0.315313	0.22906	0.055652	0.133208	0.176568	0.102789	0	0.116279
TCONS_00005376	0.426885	0	0	0	0.108052	0.866401	0.219373	0	0	0
TCONS_00005390	1.54909	0.594665	0	0.8654	1.95673	0.867827	0.558114	0.455112	0.011054	0.394271
TCONS_00005389	0.769391	0.093905	0	0.299094	0.384795	0.476553	0.153195	0.044193	0	0.076784
TCONS_00005388	0.632857	0.218523	0	0.173332	0.498504	0.136865	0.004355	0	0	0.115755
TCONS_00005382	0.599224	0.023041	0	0	0	0.282962	0	0	0	0
TCONS_00005381	0.49652	0	0	0.187602	0.635255	0	0.253658	0.10626	0	0.127401
TCONS_00005383	0.493481	0.049747	0.029066	0.174553	0.44178	0.229011	0.024867	0.152157	0	0
TCONS_00005380	0.139247	0.074283	0	0.070564	0.21027	0.07879	0.14505	0	0.503985	0
TCONS_00005378	0.107213	0	0	0.047701	0.128757	0.553745	0	0	0	0
TCONS_00005391	3.00265	0.472468	0	0.923725	2.61607	0.524548	1.2569	1.0593	0.167392	0.608056
TCONS_00005399	0.169223	0	0	0	0	0	0	0	0.394085	0
TCONS_00005400	0.391964	0.546364	0.02801	0	0	0.212271	0.099875	0.343585	0.236396	0.19798
TCONS_00005398	0	0.833164	0	0.068713	0	0.13871	0	0.419629	0	0
TCONS_00005397	0.008847	0	0	0	0	0	0	0	0.455679	0
TCONS_00001855	0	0.581426	0	0	0	0.189131	0	0	0	0.104051
TCONS_00001856	0.468119	0.084907	0.128985	0.055831	0	0.136229	0.060191	0	0	0
TCONS_00001857	0.430443	0.295209	0.030969	0	0	0	0	0	0.098378	0
TCONS_00001858	0.55237	0.386532	0.516927	0.180616	0.550884	0.3624	0.436938	0.262723	0.205476	0.216754
TCONS_00001867	0	1.54371	0.428606	0.828889	1.0411	1.26368	1.72543	0.692186	0.058856	0
TCONS_00001868	0	0.248048	0	0.006763	0.349608	0.091552	0.407419	0	0	0.080071
TCONS_00001866	0.517807	0.000692	0.366927	0.971853	0.52283	0.703402	1.08883	0.693622	0.136579	0.065988
TCONS_00001869	0.562415	0.216348	0.308345	0.35745	1.22159	0.195846	0.667857	0.356686	0.122783	0.025386
TCONS_00001870	0.351133	0	0	0.541838	0.194188	0	0.153273	0.017846	0	0
TCONS_00005401	0.29298	0.358317	0.276576	0.56704	0.455268	0.244073	0.514534	0.213262	0.881685	0.269558
TCONS_00005402	3.48038	3.27417	3.33024	1.55662	1.69859	3.61776	2.95038	1.16714	3.81564	0.988488
TCONS_00005414	0.388381	0.223013	0.19134	0.428477	0.238001	0	0.620574	0	0.210569	0.478919
TCONS_00005417	0.752571	0	0	0	0	0	0	0	0	0.775227
TCONS_00005418	0.552749	0.324144	0	0	0	0	0	0	0	0.474114
TCONS_00005416	0.648389	0.457216	0	0.16788	0.056942	0.194281	0	0	0.074397	0.46671
TCONS_00001893	0.012661	0	0	0	0.006856	0.021487	1.03223	0	0	0.064521
TCONS_00005437	1.32944	0	0	0	0	0	0	0	0	0
TCONS_00005439	0.133267	0	0	0	0	0	0.445901	0.073771	0	0
TCONS_00005445	0.075552	0.801847	0	0.193249	0	0.394536	0.152662	0.207572	0.068828	0.310475
TCONS_00005447	0.023871	0.360175	0	0.609476	0	0.088609	0.313205	0	0	0
TCONS_00005441	0	0	0	0	0	0	0.202753	0	0	0.953049
TCONS_00001896	0	0	0	0	0	0	0	0	0	0.85271
TCONS_00001901	0	0	0	1.42217	0	0	0	0	0.14559	0
TCONS_00005449	0.283165	0.573998	0	0.478871	0.047806	0.623339	0.521789	0.612032	0.029858	0.360842
TCONS_00005452	0.469551	0.545226	0	0.169745	0.042004	0.354358	0.379182	0.996431	0.141373	0.147902
TCONS_00005455	0	0	0	0	0	0	0	0.546688	0	0
TCONS_00005454	0.579904	0	0	0	0	0	0	0.824136	0.014051	0
TCONS_00001909	0.030378	0	0	0	0	0	0.12447	0.453272	0	0.669829
TCONS_00001918	0.099439	0.214599	0.128264	0	0.023149	0.026505	0	0.030988	0.678157	0
TCONS_00005471	0	0	0	0	0	0	0	0	0	0.87639
TCONS_00001917	0.11948	0.057309	0.011491	0.144976	0.072436	0.110242	0.490663	0.120291	0.205653	0.0309
TCONS_00005473	0.137375	1.46831	0.030257	0.027475	0.390377	0.095229	0.599746	0	0.115287	0.111392
TCONS_00005476	0.028846	0	0	0	0	0	0.111643	0.121355	0.098185	0.480486
TCONS_00005483	0.437738	0	0	0	0	0	0	0	0	0
TCONS_00001934	0.299345	0.282366	0.346173	0.867315	0.218452	0.108022	0.403118	0.148755	0.183055	0.21615
TCONS_00001940	0.342831	0	0	0.45406	0	0	0	0	0	0
TCONS_00005488	0.160165	0.091969	0	0	0.142027	0.755233	0.152611	0	0.104265	0.170063
TCONS_00005493	0.265363	0.05485	0	0.178348	0.244493	0.538325	0.299374	0	0.123413	0.272546
TCONS_00005494	0.289788	0.013707	0.297891	0.061541	0.37607	0.163991	0.09586	0.251365	0.255664	0.168141
TCONS_00001943	0	0	0	0.450077	0.012274	0	0	0	0	0
TCONS_00001944	0	0	0	0	0.064015	0	0.451814	0	0	0
TCONS_00001953	0.699365	0	0	0.099909	0	0.116203	0.490835	0.06187	0.210504	0.104139
TCONS_00001954	0.135446	0	0.013905	0.160657	0	0.600771	0.088252	0.261663	0	0.087403
TCONS_00005510	2.84984	0.188428	0.308166	0	1.2939	6.93388	0.569138	3.93526	2.19681	0.173643
TCONS_00005511	0.458591	0.786798	1.36844	0	0.187847	3.23303	0.379684	1.15968	0.290922	0.03129
TCONS_00005520	1.17599	1.15594	0.95829	0	0	0.451544	0	0	0	0.700572
TCONS_00001962	0.22074	0	0	0.662219	0	0	0	0	0.469687	0
TCONS_00001966	0.445286	0	0	0	0	0	0	0	0	0
TCONS_00001967	0	0	0	2.40076	0	2.63157	0	0	0	0
TCONS_00005521	0	0	0	0.545567	0	0	0.078533	0	0	0.025859
TCONS_00001968	0.027721	0.008737	1.27759	5.10189	0.06237	3.83877	0.09497	0.127251	1.4856	0.222338
TCONS_00001970	0.481411	0	0	0	0	0	0.133821	0	0	0
TCONS_00001973	0.233725	0	0.257387	0.116862	0.229516	0.255531	0.597342	1.14531	0	0.118646
TCONS_00001975	0.632963	0	0	0	0	0	1.21261	0	0	0
TCONS_00005524	0.074993	0.178235	0.023877	0.226763	0	0.511768	0.32587	0.16414	0.034159	0
TCONS_00005537	0	0	0	0	0.099094	0.615124	0	0.129211	0	0
TCONS_00005538	0	0	0	0	0	0	0	0.733507	0	0.095147
TCONS_00005539	0	0.566258	0	0	0	0.06443	0	0	0	0
TCONS_00005549	0	0.09413	0.487051	0	0	0	0.503205	0.259251	0	0
TCONS_00005550	0	0.059735	0	0.030698	0	0	0.477382	0	0	0
TCONS_00002015	0.328602	0.103914	1.63305	0	0	0	0.169054	0.789066	0	0
TCONS_00005548	2.75338	3.82573	0.815031	1.28513	0	0	2.26493	1.36011	0	0
TCONS_00005553	0.618336	0.492497	0.511277	0.347451	0	0	0.500248	0.318083	0.020113	0
TCONS_00005551	0.146388	0.430306	0.14868	0.559006	0	0	0.274406	0	0	0
TCONS_00005552	0.130054	0.372895	0.584191	0	0	0	0.357709	0.179571	0	0
TCONS_00005554	0.027317	0.624586	0	0.110646	0	0.192555	0.229425	0	0	0
TCONS_00005560	0.566828	0.078521	0.182902	0	0.122322	1.25665	0.082221	0.721823	1.38031	0.080377
TCONS_00005566	0	0	0.488262	0	0.051531	0	0	0.175748	0.150417	0
TCONS_00005567	0	0.157887	0.301984	0	0.073883	0.325849	0	0.39797	0.246144	0.226041
TCONS_00005562	0.060874	1.39095	0	0	0.326029	0.757876	0.165854	0.135452	0.046951	0.054855
TCONS_00005563	0.082777	0	0.156271	0	0	0.263525	0.507546	0	0	0.08212
TCONS_00005578	0	0	0.034225	0	0.176801	0.559563	0	0.027893	0	0
TCONS_00002027	0.07856	0	0.054071	0.679215	0.286634	0.095179	0.050464	0.070016	0.083189	0
TCONS_00002026	0	0	0	0	0	0.260822	0	0.445486	0	0
TCONS_00005575	0.195899	0.300998	0	0	0.174518	0	0.587902	0.459456	0	0.029134
TCONS_00005576	16.8515	0.497578	0.040117	0.388755	0	10.3789	27.7076	29.6635	0.48244	10.2473
TCONS_00005577	14.1315	53.944	0.768538	0.458795	0.695947	1.1626	9.00422	6.48857	1.24214	0.728633
TCONS_00002028	1.41863	2.91507	2.42032	2.29946	3.39314	0.105403	0.504371	0.197357	1.80964	1.35235
TCONS_00002031	0.044242	0	0	0	0.321512	0.097212	0.35793	0.262543	0.335786	0
TCONS_00005579	0	0	0.131806	0	0.018985	0	0	0.059955	0	0.47476
TCONS_00005582	0.178091	0	0.73512	0	0.047106	0.099894	0	0.026418	0	0
TCONS_00005583	0.389559	0	0.964147	0	0.101297	0	0	0.178987	0	0
TCONS_00005585	0.213867	0.467316	0	0	0.125832	0	0	0	0.110218	0
TCONS_00005588	0.628002	0.142511	0	0	0.159489	0.726768	0.080681	0	0	0
TCONS_00005589	0.648289	0.259213	0.086711	0.100524	0.158643	0.045791	0.161045	0	0.034445	0.195057
TCONS_00005591	0.208449	0.411267	0	0.136823	0.117537	0.080103	0.611733	0	0.184459	0
TCONS_00005594	0.226704	0.219853	0	0	0	0	0	0	0	0
TCONS_00005596	0.732773	0.285477	0.242627	0.168505	0	0	0.502367	0	0.295775	0
TCONS_00005595	0.679526	0.06512	0.45506	0.470158	0.420709	0.309731	0.135906	0	0	0.069456
TCONS_00005597	0.316099	0.093923	0.109389	0.121407	0.133198	0	0.671543	0	0.116272	0.299411
TCONS_00005598	0.305576	0.217066	0	0.228018	0.399712	0.178006	0.906591	0	0	0.078741
TCONS_00005599	0.289287	0.120652	0.251062	0.0752	0.101107	0.246166	1.30473	0.091616	0.056049	0.155459
TCONS_00002070	0.049823	0	0.078381	0.008473	0	0.059131	0.013063	0	1.26798	0.038712
TCONS_00005607	0.008803	1.51755	1.30112	0	3.15548	0.28455	0.053559	0.082477	0	0
TCONS_00002102	0.031111	0	0	0	0.193523	0	0.758361	0	0	0.186813
TCONS_00002103	0.083919	0	0	0	0.069128	0.049799	0.711676	0	0.007645	0.104066
TCONS_00005626	0.173085	0.012196	0	0	0.063916	0.047842	0.519474	0	0	0.42887
TCONS_00002107	0	0.030398	0.26553	0	0	0	0.838911	1.13682	0	0
TCONS_00005632	0.380717	0	0.517925	0.021613	0.149984	0	0.206229	0.019529	0	0
TCONS_00002108	0	0.460236	0.330813	6.9894	0	0.823775	0.283294	0	0	0
TCONS_00002109	0	0	0	1.65224	0	0	0	0	0	0
TCONS_00005621	0	0.720882	0.013993	0	0	0	0.182837	0	0.168463	0
TCONS_00005622	0.463527	0.045531	0	0.103237	0	0.120879	0.212922	0.270186	0.046393	0.211033
TCONS_00005617	0.522821	0.073842	0.519619	0.308058	0.199665	0.156975	0.114876	0.262129	0.079661	0.292008
TCONS_00005634	0.133323	0.067713	0	0	0.149109	0.066457	0	0.044443	0	0.472594
TCONS_00002116	0.119567	0	0.259833	0.212033	0	0	0.47763	0	0	0
TCONS_00002122	0.226333	0.46004	0.266354	0.443604	0.098632	0.222089	27.0131	4.38839	0.112686	3.47052
TCONS_00005649	0.825081	0.787783	0.372913	1.31871	1.88359	0.454951	0.618324	1.44976	0.732604	0.054014
TCONS_00002138	0	0	0	0	0	0	0	0.408437	0	0
TCONS_00005651	0.120685	0.27615	0.132903	0	0.122598	0.11978	0.373767	0.620268	0	0.245054
TCONS_00005655	0.451119	0	0	0	0	0.073457	0	0	0	0
TCONS_00005658	0.470228	0	0	0.26883	0.131523	0	0	0.133142	0.416999	0
TCONS_00002150	449.546	481.724	558.17	501.174	644.432	1244.6	534.935	332.334	617.338	570.321
TCONS_00005656	42.8422	21.8292	45.7051	46.0957	33.0809	36.3076	36.5733	25.7845	23.4307	33.0128
TCONS_00005665	0	0	0	0	0	0	0	0.019316	0.500829	0
TCONS_00005666	0	0.430939	0	0	0	0	0	0	0	0
TCONS_00005667	0.003098	0	0.011939	0.153075	0.044317	0.44705	0.091001	0.344729	0	0.150432
TCONS_00005672	0.159962	0	0	0	0	0	0	0.624889	0.281985	0
TCONS_00005659	1.83919	0.843118	0.875102	1.40531	1.02584	1.71199	1.07703	1.121	0.687122	0.622876
TCONS_00005682	0	0	0	0.432661	0.627302	0.680539	0	0.654533	0	0.239544
TCONS_00005684	0	0	0.155421	0	0	0	0	0	0.801435	0
TCONS_00005681	0.046679	0	0.646204	0.045206	0.041166	0.189762	0.36002	0.126708	0.024555	0.111511
TCONS_00002163	0.494663	0.309332	0.388408	0.381311	0.416459	0.476776	0.325826	0.264008	0.430592	0.177359
TCONS_00005689	0.131768	0	0	0	0.043727	0	0	0.237307	0.156853	0.044593
TCONS_00005710	0.245301	0.27926	0.282889	0.309608	0.446925	0.461234	0.677638	0.86525	0.505518	0.236058
TCONS_00005697	0	0.230973	0.31271	0	0.494977	0.889434	0.358282	0.327152	0	0.403062
TCONS_00005698	0	0.00656	0.537851	0.007785	0.013259	0.013061	0.042363	0.025045	0.0086	0
TCONS_00005699	0	0	0.411779	0.768327	0.518848	0.405468	0.443581	0	0	0
TCONS_00005700	0	0	0.249423	0.725823	1.07948	1.19498	0.503524	0	0	0
TCONS_00005706	0	0.36322	0.312876	0.217599	0.470583	0.448806	0.252741	0.000409	0.156059	0.019176
TCONS_00005705	4.68069	1.36793	0.499738	1.24633	1.86773	1.64072	0.646489	1.5953	1.35752	1.59852
TCONS_00005707	3.04379	4.78679	1.17362	4.57301	2.70119	5.14065	1.95372	1.65983	4.50323	0.069822
TCONS_00005704	1.87437	1.02599	0	0.380018	0.83879	0.831621	1.1074	0.509817	0.718779	0
TCONS_00005703	1.28055	0.914539	0.97068	0.714065	1.12084	0.663463	0.428634	1.2164	1.4307	0.287694
TCONS_00005701	0.299535	0.891149	0	0.456277	0.909731	0.618614	0.393008	0.482308	0.366396	0.246998
TCONS_00002193	0.024365	0.046075	0	0.021441	0.024751	0.013886	0.4616	0.017494	0	0.012368
TCONS_00002192	0.439354	0	0	0	0	0	0.184187	0	0.021897	0
TCONS_00005715	0.518576	0	0	0	0	0.201208	0	0.275283	0.602448	0.015571
TCONS_00002200	0	0	0.327618	0.154113	0	0	0.173479	0.442804	0.138596	0.432715
TCONS_00005717	0.107745	0	0.234152	0.213342	0.490539	0.1249	0.550013	0.177977	0	0.597827
TCONS_00002190	0.127068	0	0	0	0	0	0.683682	0.072559	0	0
TCONS_00005724	0.287219	0.272306	0.127539	0.231628	0.174515	0.500193	0.176167	0.673884	0.30881	0.931251
TCONS_00005740	0	0	0	0	0	0.087436	0.638411	0	0	0
TCONS_00002233	0.101013	0.454275	0.111425	0.480106	0.872307	0	0.363974	0.453436	0.045166	0.154089
TCONS_00005741	0.182347	0.092708	0.079346	0.065236	0.664811	0.520177	0.518623	0.203235	0.021732	0.042095
TCONS_00002224	0	0	0	0.673736	0	0	0	0	0	0
TCONS_00005732	0.326622	0.391505	0.098269	0.276929	3.30754	0	0.954764	0	1.4932	0.841505
TCONS_00005733	0.38974	0	0.952008	0.4978	0	0.530387	0.150305	0	0.580775	0
TCONS_00005748	0.073862	0.187809	0	0	0.106972	0	0	0	0.400997	0
TCONS_00005749	0.465344	0.143244	0	0	0	0.270617	0	0	0.272349	0.275594
TCONS_00005753	0.009183	0	0	0	0	0	0	0	0	0.523834
TCONS_00005750	0.102012	0	0.056264	0.051091	0.321095	0.177676	0	0	0.116161	0.08455
TCONS_00005752	0.098387	0	0	0.12773	0.52209	0.150569	0	0	0	0.047754
TCONS_00002239	0.017904	0.196093	0.304951	0.090117	0.453788	0.396349	0.301784	0.160685	0.640437	0.269934
TCONS_00002240	0.176873	0.218299	0.117035	0.028957	0.236919	0.513386	0	0.341712	0.104806	0
TCONS_00005761	0.004548	0	0	0	0	0	0	0.524804	0	0
TCONS_00005763	0	0.032696	0	0	0.121175	0.174624	0	0.616619	0	0.249203
TCONS_00005764	0	0.166974	0	0	0	0	0.406556	0.3249	0.01582	0
TCONS_00005766	0.022293	0	0.006137	0.042543	0.090586	0.036884	0.055754	1.29353	0	0
TCONS_00005773	0.145896	1.4768	0.324038	1.0532	0.447622	1.10584	0.300404	0.099196	1.47948	0.406466
TCONS_00005787	0	0	0	0.25406	0.765696	0	0.094616	0	2.70959	0
TCONS_00005788	0.241171	0	0	0.508245	0	0	0	0	0.235021	0
TCONS_00005790	0.735276	0	0	0	0	0	0	0	0	0
TCONS_00005789	0.396808	0	0.311922	0	0	0.206806	0.264679	0	0.356641	0.08635
TCONS_00005801	0.104561	0.197732	0	0	0.159328	0.121613	0	0.186432	0.247065	0.58068
TCONS_00005794	0	0	0	0	0	0.047925	0.604993	0	0.06569	0
TCONS_00002262	0.054491	0	0	0.737901	0	0	0.342253	0.305655	0.1375	0.057628
TCONS_00005807	0.778199	0.056411	0.172895	0.0785	0	0.174084	0	0	0	0
TCONS_00005815	0	0	0.831614	0	0	0	0.403707	0	0	0
TCONS_00002289	0	0.039664	5.95442	0.560254	0.304497	0.013654	3.17913	0.244431	0.02711	0.901837
TCONS_00002290	0	0.058661	0.576454	0.430012	0.082065	0.062538	0.736883	0.035194	0.027327	0.572324
TCONS_00005814	0.777709	0.759706	27.6095	3.76855	2.05243	0.91471	35.4464	1.13632	1.41121	6.78966
TCONS_00005817	0.168251	0	0	0	0	0	0	0.825478	0	0.076015
TCONS_00002305	0.169649	0	0	0	0	0.119719	0.20786	0	0.541346	0
TCONS_00002321	0.843317	0	0	0	0	0	0	0	0	0
TCONS_00005842	0.025601	0	0	0	0	0	0.77388	0	0	0
TCONS_00005853	0.070372	0	0	0.244191	0	0	0.024109	0.120736	0.559156	1.49371
TCONS_00005845	0.487444	0.184752	0	0	0.13913	0	0.040218	0	0.545458	0
TCONS_00002329	0	0.772541	0	0	0	0.976599	0.57374	0.597473	0.320434	0.478312
TCONS_00002337	0.412587	0.041403	0.140451	0.123712	0	0	0.195749	0.035484	0	0.194228
TCONS_00002348	0	0	0	0	0	0.315556	0.603275	0.047997	0	0
TCONS_00002349	0	0	0.144102	0	0	0.047334	0.567561	0.019105	0	0
TCONS_00005862	0	0	0	0	0	0	0	0.392861	0	0.145177
TCONS_00002345	0	0	0.050394	0.431873	0.193501	0.262796	0.705491	0.307511	0	0.346126
TCONS_00002346	0.126912	0.418398	0	0.063456	0.032231	0	0.130438	0.113901	0.056652	0.257698
TCONS_00005874	0	0	0	0	0	0	0	0	0.465868	0
TCONS_00005875	0	0	0	0	0	0	0.481162	0	0	0
TCONS_00002357	0	0.715278	0.864533	0	0	0	0.198209	0.529003	0.781333	0
TCONS_00005891	0	0.553764	0	0	0	0	0	0	0	0
TCONS_00005892	0	0	0	0	0	0.639118	0	0	0	0
TCONS_00005895	0	0	0	0	0	0	0.446119	0	0	0
TCONS_00005897	0	0	0	0	0	0.515476	0.218158	0	0	0
TCONS_00005899	0	0	0	0	0	0	0.65541	0	0	0
TCONS_00005912	0	0	0	0.228384	0.302353	0.045237	0	0	0	1.51779
TCONS_00005913	0	0	0	0.499869	0.37069	0	0	0	0	0
TCONS_00005888	0.120492	0.495872	0.406088	0.346077	0.322981	0.593747	0	0.708011	0.453069	0.407174
TCONS_00005887	0.535329	0.856341	0.322183	0.552928	0.605216	0.792033	0.244729	0.682229	0.533746	0.57014
TCONS_00002355	0.762055	0	0	0.323842	0	0.542212	0.12111	0	0	0.064655
TCONS_00005893	0.426802	0.43823	0	0	0.112025	0	0.517249	0.345465	0.207586	0.644562
TCONS_00005898	0.049571	0.990401	0.461734	0.716546	0.704998	0.221683	0.407306	0.741485	0.420431	0.396584
TCONS_00005901	0.651231	0	0	0	0	0	0	0	0	0
TCONS_00005907	0.060006	0	0	0	0.440211	0	0.104775	0.183595	0	0
TCONS_00005910	0.110153	0.015867	0.016755	0.125074	0.25703	0	0.063963	0.762085	0.135138	0.028623
TCONS_00002361	0.240925	0.158241	0.126333	0.166008	0.190791	0.18877	0	0.656131	0.134502	0.243498
TCONS_00002359	0.163446	0.158266	0.18041	0.026419	0.157032	0.065645	0	1.67372	0.277125	0.179093
TCONS_00002360	2.29156	1.07977	1.35806	1.0416	1.13471	1.8221	1.47735	0.768363	0.849917	1.35289
TCONS_00002362	0.601966	1.52737	0.655567	1.08022	1.46697	0.404638	0	0.578229	1.11306	0.622868
TCONS_00002363	0.046628	0.302827	0	0.190543	0.115332	0	0.298952	0	0	0
TCONS_00002364	0.129579	0.35652	0.230236	0.850039	0.098513	0.655223	0.01106	0.366831	0.612096	0.27343
TCONS_00005920	0	0.136424	0.083329	0	0.086965	0	0	0.085464	0	0.341473
TCONS_00005922	0.246683	0.146815	0	0.563488	0.094768	0.214969	0.282494	0.149405	0	0
TCONS_00002380	0	0	0	0	0	0	0	0	0.34565	0.040842
TCONS_00002381	0.611252	0.128435	0	0.238504	0.069224	0.054191	0.208944	0.549197	0.29354	0.023922
TCONS_00005927	0	0	0	0	0	0	0.66139	0	0	0
TCONS_00005926	0.215162	0.336826	0	0.356228	0	0	0	0	0.084385	0.093551
TCONS_00002384	0.552944	0	0.032626	0	0	0.048941	0	0.055105	0.803078	0
TCONS_00005942	0.080767	0	0.589509	0.093915	0.190807	0.216277	0.862281	0.31467	0.16769	0.277406
TCONS_00005946	0.106064	0.196563	0	0	0.107386	0.12295	0	0	0.661892	0.645739
TCONS_00002407	0.300019	0.762805	0.124484	0.020089	0.136267	0.684557	0.340265	0	0.808131	0.031077
TCONS_00005953	0.60481	0.188605	0.222632	0	0.204685	0.150487	0.103891	0.635036	0.089041	0
TCONS_00005958	0	0.662257	0.154572	0.140362	0	0.254675	0.341899	0	0.375517	0
TCONS_00005964	0	0.118603	0.122007	0.164862	0	0	0.134089	0.596065	0.038561	0.129452
TCONS_00005965	0	0	0	1.08576	0	0	0	0	0	0
TCONS_00005966	0	0.212063	1.00865	0.522397	0	0.366603	0.366688	0.289077	0.227031	0.2108
TCONS_00005967	0	0.168127	0.436444	0.560984	0	0.655386	0	0.153964	0	1.69275
TCONS_00005968	0.077077	0.083756	0.138793	0.744562	0	1.24689	0.059118	0.153264	0	0
TCONS_00002429	0.971271	0	0	0	0	0	0	0	0	0
TCONS_00005978	0.763568	0	0	0	0	0.087068	0	0	0	0
TCONS_00002430	0.48124	0	0	0	0	0	0.16487	0.253383	0	0.130833
TCONS_00002431	0.468942	0.379191	0.618288	0.080207	0.1396	0	0.402283	0.141568	0	0
TCONS_00002435	0.105558	0.720841	0.504244	0.035186	0	0.081303	0	0.442103	0	0
TCONS_00005994	0.441373	0.27799	0.081145	0	0	0.077989	0.084063	0.727438	0.032892	0.075308
TCONS_00005996	0.363696	0.392384	0.081206	0.207234	0.26315	0.004404	0.240858	0.16305	0.209634	0.128693
TCONS_00005995	0.369556	0.420848	0	0.243547	0.302698	0.159122	0.259818	0.242084	0.163673	0.192652
TCONS_00002447	0	0.515289	0.11258	0.315145	0	0	0	0.100028	0.308804	0.340246
TCONS_00005992	1.34388	0.909115	0.211623	0.373373	0	0.228758	0.198832	0.432903	0.172714	0.874027
TCONS_00006005	0.43626	0	0	0.130878	0	0.507408	0.313866	0.352381	0.077896	0.088584
TCONS_00002472	0.026625	0.40146	0.346377	0.102596	0.09124	0	0.4393	0	0.235803	0
TCONS_00006017	0.036975	0.405123	0.262131	0.068712	0.003869	0	0.097858	0.139144	0.059078	0.095378
TCONS_00002493	0.532386	0.01641	0	0.374496	0.069592	0	0.173675	0.236912	0.398763	0.555946
TCONS_00002479	0.496588	0.308418	0.203518	0.38003	1.128	0.266494	0.204518	0.820357	0.03836	0
TCONS_00002480	0.467106	0.336707	0.530011	0.186761	0.709504	0	0.45635	0.327958	0.111399	0
TCONS_00002481	0.381951	1.20302	0.017879	0.120481	0	0.155535	0.657784	0.400693	0.105656	0
TCONS_00002494	0.13994	0.503292	0.254559	0.147266	0.17379	0.433322	0.330954	0.149265	0.094846	0.447428
TCONS_00002486	0.09206	0.137862	0.40278	0.297578	0.810334	0.342636	1.05716	0.710996	0.380291	0
TCONS_00006030	0	0.496339	0.092492	0	0.192682	0.061054	0.107903	0	0.097478	0.169831
TCONS_00006034	0.234587	1.24249	0	1.05345	0.75315	0	0.386799	0.662292	0.411308	0.191044
TCONS_00002514	0.52789	0.07179	0	0	0	0	0	0	0	0
TCONS_00002515	1.96168	0	0	0	0	0.036455	0	0	0.207442	0.015911
TCONS_00002518	0.470091	0.495866	0	0.284329	0	0	0	0	0.042307	0
TCONS_00006040	0	0	0	0	0	0	0.076057	0.319235	0.528095	0
TCONS_00002519	0.457918	0	0	0.05495	0	0	0	0	0	0
TCONS_00006038	0	0.569201	0.327576	0	0.3126	0.914995	0	0.237514	0	0.190765
TCONS_00002513	0	0.467366	0.163299	0	0	0.5749	0.198128	0	0	0
TCONS_00006046	0.169824	0.36099	0.176654	0.064165	0.325479	0.148762	0.231478	0.401574	0.084973	0.13029
TCONS_00002525	0.236322	0.043529	0.050697	0.591724	0.046767	0	0.094631	0.082634	0.164402	0.093167
TCONS_00002536	0.494288	0	0.124289	0	0	0	0	0	0	0
TCONS_00006092	0	0	0	0.082538	0.120812	0	0.159629	0.086423	0.118852	0.473056
TCONS_00002540	0	0.494998	0	0	0	0	0.173374	0	0	0
TCONS_00006069	1.8822	0.657092	0.368858	0.041509	1.45333	0.671335	0.655346	0.391693	0.16665	0.524295
TCONS_00006067	1.766	0	0.765174	0.515705	1.31902	0.316609	0.355748	0.296171	0.026266	0.66835
TCONS_00002550	0	0	0.717006	0.209072	0	0.126212	0	0	0	0
TCONS_00002551	0	0.855607	0	0	0.098222	0	0.118524	0.47136	0	1.55792
TCONS_00002558	0.331899	0	0	0	1.10601	0	0	0	0	0
TCONS_00002561	0	0	0	0	0	0.010682	0	0.006594	2.37516	0.074597
TCONS_00006116	0.467818	0.042543	0.01982	0.07439	0	0.187697	0.018498	0	0	0.23681
TCONS_00006112	0	0	0	0	0.827337	0	0	0	0	0
TCONS_00006110	0.506303	0.015044	0	0	0.00736	0	0.043802	0	0	0
TCONS_00006111	0.483053	0	0	0	0.074266	0	0	0.919795	0	0
TCONS_00006113	0.82513	0.115468	0	0.167226	0.019558	0	0	0.064674	0	0
TCONS_00002560	0.043293	0	0	0	0	0	0.76717	0	0	0
TCONS_00006132	0	0.486132	0.226173	0.307728	0.204811	0.119437	0.100266	0.183342	0.273357	0.156387
TCONS_00002581	0.966603	0.660272	0.362518	0.197322	0.96072	0.488922	0.974368	0.831544	0.564823	0.960748
TCONS_00002569	0	0.159607	0	0	0.298942	0	0.441823	0	0	0.470147
TCONS_00002570	0	0.009832	0	0	0.653803	0.024306	0.094138	0	0.04505	0.515412
TCONS_00002571	0	0	0	0	0.998704	0	0.655835	0	0	0.05004
TCONS_00002572	0	0.063632	0	0	0.824703	0	0.706495	0	0	0.288385
TCONS_00002574	0	0	0	0	0	0	0.485424	0	0	0
TCONS_00002583	0	0	0	0	0	0	0	0.705059	0	0
TCONS_00006139	0.405653	0	0.23031	0.631015	0	0	0.247374	0.241092	0	0
TCONS_00006140	0	0	0.210322	0	0	0.169966	0	0.38956	0	0
TCONS_00006141	0	0.084601	0	0	0.589573	0	0	0	0.100606	0.078749
TCONS_00006143	0.261485	0.077032	0.277476	0	0.170641	0.145932	0	0.149752	0	0.170542
TCONS_00006146	0.246177	0.04018	0.161369	0.199286	0	0	0.454826	0.076276	0	0
TCONS_00002589	0.541825	0.129663	0.503385	0.091117	0.156952	0.212308	0	0	0.125149	0.139226
TCONS_00006157	0.022341	0	0	0	0.022544	0	0	0	0.129781	0.725231
TCONS_00002604	0.045084	0.362949	0.084638	0	0.026171	0	0.066195	0	0.45233	0.177421
TCONS_00002606	0.014036	0.124975	0	0.136619	0.049905	0.242975	0.036065	0.280707	0.260231	0
TCONS_00002605	0.577041	0	0	0	0	0	0.761553	0.296215	0	0
TCONS_00002600	0	0.38474	0.436011	0.394121	0	0.292944	0.304693	0	0	0.348928
TCONS_00006161	0	0	0	0	0.448902	0	0	0	0	0
TCONS_00006155	0.284035	0.037541	0.044144	0	0.02482	0.133208	0	0.509489	0	0
TCONS_00002593	0.141763	0.356306	0.162927	0	0	1.123	0.078944	0	0	0
TCONS_00002613	0.276907	0	0	0	0.405935	0	0.204828	0	0.823347	0
TCONS_00006168	1.38213	0.974511	0.832229	0.978319	1.68539	1.40796	0.900367	1.26719	0.863421	1.30569
TCONS_00006170	0	0	0	0	0.018148	0	0.28491	0	0	0.28144
TCONS_00006171	0.053251	0	0	0	0.324569	0.014452	0	0	0	0.324381
TCONS_00002626	0	0.590072	0.098681	0.287708	0	0	0	0.042796	0.182859	0
TCONS_00006175	0	0	0.209021	0	0	0.14407	0.129715	0.566964	0	0.078278
TCONS_00002658	0	0	0.407352	0	0.183931	0	0	0	0	0
TCONS_00006176	0.107984	0	0.141384	0	0	0	0.460302	0	0.008219	0
TCONS_00006178	0.661729	0.757643	0.246059	0.433631	0.074746	0.590501	0.453745	0.330183	0.447133	0
TCONS_00002653	1.17534	0.446994	0.89958	0.695261	0.571841	0.340939	0.304587	0.919435	0.673711	0.454857
TCONS_00002652	0.212975	0.015051	0.750889	0	0.239658	0.748773	0.331877	0.352578	0.083756	0.124247
TCONS_00002656	1.25067	1.44995	0.756486	0.837012	0.531518	1.08041	0.763317	1.05814	0.886265	0.440945
TCONS_00002660	2.46205	2.35744	1.3225	0.938933	0.239053	1.04371	0.330945	0.208029	0.34443	0.379968
TCONS_00002659	1.17341	1.37359	1.56568	0.197716	0.092579	0.4527	0.047711	0.198556	0.207842	0.43457
TCONS_00006179	0.11793	0	0.320475	0	0.359398	0.136248	0.36052	0.021521	0	0.156673
TCONS_00002677	0.458319	0.729883	0	0.173971	0.124933	0	0.1264	0	0.271564	0
TCONS_00006188	0	1.43054	0.377535	0	0	0	0.353136	0.50445	0.470179	0.158527
TCONS_00006189	0	1.5348	0	0.086089	0.533767	0	0.452165	0.441197	0.283049	0.342378
TCONS_00006191	0	0.506207	0.036596	0	0	0.004582	0	0.678902	0.093618	0
TCONS_00006194	0	1.10052	0.334603	0	0	0	0.502152	0.66355	0.371811	0
TCONS_00006195	0	0.740053	0.167897	0.189592	0	0	0	1.19374	0.306844	0.11031
TCONS_00006197	0	1.3491	0.480021	0	0	0	0	0.241894	0	0
TCONS_00006198	0	2.21932	0.547905	0	0	0	0.117457	0.874652	0.324391	0
TCONS_00006199	0	1.37418	0.149298	0	0	0	0	1.27757	0.019769	0
TCONS_00006181	0.466592	0.375239	0.078859	0.367304	0.967891	0	0.962755	0	0.433534	0.356611
TCONS_00006182	1.54844	0	0	0	0.613646	0.455129	0.3569	0	0	0.309
TCONS_00006183	1.09975	0.741525	0.6689	0.466882	1.83043	0.81727	1.25635	0	0.964431	1.99187
TCONS_00006184	0.84247	0.689657	1.73561	1.27282	4.99438	1.1428	1.63454	0.048139	1.63421	3.06763
TCONS_00006196	0.077094	0.861621	0.803147	0	0.1535	0	0	0.40315	0.549705	0
TCONS_00006200	0.089362	0.427567	0.494502	0	0	0	0	0	0	0
TCONS_00006215	0.434351	0.269182	0.907218	0.393484	0.339832	0.910377	1.03743	0.894284	0.872011	0.034009
TCONS_00002676	0.744604	0.354677	0.877834	1.18324	0.477516	0.388504	0.276861	0.931182	0.564158	0.542193
TCONS_00002694	0.826358	0.549556	0.303677	0.794132	0.420665	0.240951	0.141237	0.340452	1.50477	0.382796
TCONS_00006224	0	1.634	0.071262	0	0.131474	0.263425	0	0	0.052614	0
TCONS_00006230	0	0	0.085225	0	0.161411	0.73922	0	0	0	0
TCONS_00006225	0.437738	0.491157	0.473217	0	0.198623	0	0	0.392861	0.13007	0
TCONS_00006226	0.442741	0.018606	0.64521	0.122984	0.14992	0.102989	0.151681	0	0.043774	0.115372
TCONS_00002687	1.85234	1.05724	1.01201	1.17961	1.52397	1.76212	1.28808	1.5373	1.14282	0.757678
TCONS_00002722	0.695984	0.458589	0.133527	0.120645	0.512403	0.277351	0.12462	0.294723	0.270626	0.246205
TCONS_00002723	0	0.105589	0	0.030456	0.061877	0.002598	0.622284	0	0	0.123683
TCONS_00006261	0	0.292367	0	0	0	0	0	0	0	0.432737
TCONS_00006263	0	0.166667	0.549561	0	0	0.086912	0	0	0.000498	0.472019
TCONS_00006264	0.309051	0.010184	0	0.313529	0	0	0	0.157105	0.708471	0
TCONS_00006262	0.297182	0.130848	0.43796	0.399066	0.231694	0.249741	0.257796	0.599192	0.461728	0.498625
TCONS_00002736	0.76209	0	0	0	0	0.221687	0	0.037063	0.020703	0.205445
TCONS_00002735	0.674947	0.440587	0.908921	0	0	0.514415	0.093414	0	0	1.8827
TCONS_00002738	0.384324	0	0	0	0.078083	0	0	0.412528	0	0
TCONS_00006268	3.09101	0	0.36386	0	0.170926	0	0	0	0	0
TCONS_00006271	0.050183	0.143628	0	0.10138	0.102987	0.165472	0.049667	0.341048	0.631607	0.154392
TCONS_00006272	0.076751	0.07257	0.253562	0.230252	0	0	0.078883	0.068882	0.068521	0
TCONS_00006276	0.488171	0	0	0	0.206815	0	0.330938	0	0.743997	0
TCONS_00002768	0	0	0	0	0	0	0.496151	0	0	0
TCONS_00006280	0	0	0.096739	0.101462	0	0	0	0	0.247435	0.531551
TCONS_00006282	0	0.746879	0.552772	0.372029	0.186925	0.190428	0.182172	0.170262	0.417012	0.251377
TCONS_00006283	1.06342	1.22466	1.58409	2.63923	1.97064	2.05229	0.985142	1.7581	2.18816	1.22847
TCONS_00006281	0.439076	0.079301	0	0	0.072168	0.01664	0.006592	0	0.457183	0.157776
TCONS_00002771	0	0	0	0.171539	0	0	0	0.515085	0	0
TCONS_00002755	0	0.108775	0	0	0	0	0.022471	0	0.125301	0.81232
TCONS_00002756	0	0	0	0	0	0	0	0	0	0.635848
TCONS_00002757	0	0	0	0	0	0	0.451814	0	0	0
TCONS_00002779	0	0	0.819853	0.032964	0	0	0	0.009906	0.019707	0
TCONS_00006292	0	0.362987	0	0.515756	0	0	0	0.579497	0	0.518956
TCONS_00002790	0.068937	0.372692	0.243367	0.16657	0.226508	0.030307	0.153569	0.443447	0	0.100463
TCONS_00006315	0.240994	0.307369	0	0.111661	0.132472	0.093432	0.061097	0	0.061199	0.16529
TCONS_00006316	0.314166	0.046799	0.459621	0.080384	0.106977	0.273133	0.240818	0.06159	0.132405	0.170885
TCONS_00006323	2.45943	0	0	0.255043	0	0	0	0.36414	0	0.044855
TCONS_00002798	0.557435	0	0	0.078003	0.040586	0	0	0	0	0
TCONS_00002799	0.618511	0	0	0.045601	0	0	0.255641	0.093013	0	0
TCONS_00006335	0.059442	0.270169	0.416235	0	0.7496	0	0.007584	0	0	0
TCONS_00006336	0	0.106919	0	0	0	0.206214	0.500714	0	0	0.360011
TCONS_00002806	0.20884	0.378475	0.402151	0	0	0	0.057715	0.028323	1.13754	0.54185
TCONS_00006349	0	0.086652	0	0.453486	0.358206	0	0	0	0.14207	0.328864
TCONS_00006340	0	0	0.868206	0	0	0.154584	0	0	0.101398	1.10097
TCONS_00006346	0.228711	3.196	17.1482	7.01427	0	7.94385	0	5.55108	0	10.4762
TCONS_00006338	0.790178	0.09768	1.81518	0	0.279851	0.240308	0	0.584312	0	0
TCONS_00006339	0.030162	0.412108	0.039859	0.075406	0	0.780856	0	0.135351	0.047124	0.114836
TCONS_00002812	0	0	0.78189	0	0	0	0	0	0	0
TCONS_00002816	0.505941	0	0.731346	0.202923	0.156909	0	1.20467	0	0	0
TCONS_00006354	0.218347	0.572071	0.478434	0.19398	0.145267	0.848761	0.447509	0	0.512672	0
TCONS_00006372	0.173467	0.09146	0	0.096729	0.096952	0.048752	0	0.043406	0.110825	0.489717
TCONS_00006376	0.257727	0.257437	0.110074	0.372893	0.121436	0.105608	0.062123	0.162802	0.056126	0.153416
TCONS_00006379	0.154335	0	0	0	0.47533	0	0	0	0.033053	0
TCONS_00006380	0.140362	0.189638	0	0.0864	0.284223	0.216945	0	0.192037	0.417705	0
TCONS_00006381	0.204381	0.045315	0	0.143777	0.22488	0	0	0.032999	0.534043	0
TCONS_00006382	0.462109	0	0.191954	0.151647	0.144805	0.22909	0	0.123238	0.540166	0
TCONS_00006383	0.318489	0.123377	0	0.057907	0.698647	0.127742	0	0.213517	0.208343	0.020577
TCONS_00006384	0.094516	0.267658	0.055946	0.540318	0.047367	0.054965	0.006071	0.407096	0.218941	0.005877
TCONS_00006387	0.1708	0	0	0	0.420476	0	0	0	0.373221	0.6293
TCONS_00006385	0	0.335669	0.097736	0.177502	0	0	0	0.14656	0.621729	0
TCONS_00006388	0.12326	0.072384	0	0.148409	0.274292	0.033108	0	0.036957	0.406125	0.247477
TCONS_00002824	0	0	0.122783	0	0	0.111295	0	0.086167	0.428575	0.087956
TCONS_00002825	0.258703	0.48096	0.863824	0.502984	0.259697	0	0	0	0.204044	0.11003
TCONS_00006399	0	0	0	0.128991	0	0.035689	0.280918	0.610962	0	0
TCONS_00006390	0.265495	0.296187	0	0	0.066758	0.089173	0	0.375894	0.437092	0.032915
TCONS_00006391	0.236744	0.364016	0.039081	0.043565	0.601242	0.014131	0.001606	0.046731	0.186566	0.105201
TCONS_00006392	0.304252	0.241444	0	0.186458	0.36467	0.079199	0.088069	0.030762	0.484301	0.034799
TCONS_00006393	0.308613	0.055241	0	0	0.396246	0.239829	0	0.071557	0.641862	0.026517
TCONS_00006394	0.486752	0.197612	0	0.048188	0	0.281493	0	0	0.169667	0
TCONS_00006396	0.501069	0.113325	0	0.145008	0.104833	0	0.067407	0	0.075506	0.231742
TCONS_00006397	0.083167	0.248941	0	0.26672	0.955683	0.416798	0	0.321151	0	0.496272
TCONS_00006398	0.532724	0.591579	0.225636	0.130758	0.216186	0.120661	0	0.139403	0.548606	0.18725
TCONS_00006413	0	0	0.44324	0	0	0	0.413674	0	0	0
TCONS_00002852	0	0	0	0	0	0	0.693385	0	0.069323	0
TCONS_00006430	0.176597	0.20187	0	0.462133	0.080995	0	0.673476	0.168602	0	2.77185
TCONS_00006429	0.140042	0.047951	0	0.070309	0.024222	0.062711	0.137357	0.36228	0	0.119034
TCONS_00006438	0.079672	0	0	0	0	0	0.16487	0.013437	0.643505	0
TCONS_00006431	0.631709	0.553332	0.623709	0.363092	0.882293	0.478106	0.19148	0.758452	0.401675	0.367241
TCONS_00006432	0.254018	0.333096	0.162581	0.205593	0.388074	0.209809	0	0.301003	0.334399	0.301405
TCONS_00006433	0.168695	0.573667	0.264382	0.205515	0.556974	0.149044	0.233095	0.619167	0.471478	0.320381
TCONS_00006444	0	0.767315	0.24589	0.742296	0.226824	0.777943	0.724926	0.263406	0.132895	0.791914
TCONS_00006449	1.80524	4.60719	0.945606	3.72343	4.33173	0.918686	1.81982	4.08694	4.95216	5.1728
TCONS_00006460	0.344354	0	0.806462	0.048821	0	0	0.030776	0.262898	0	0.090542
TCONS_00006461	0.017592	0.112042	0.525473	0.119291	0	0	0	0	0.425647	0
TCONS_00002892	0.648689	0.087413	0.036213	0	0	0	0.047827	0.128075	0	0
TCONS_00006483	0.119567	0	0	0.019662	0.180575	0.018851	0.720131	0.32157	0.053373	0.060696
TCONS_00006486	0.337602	0	0	0	0.232523	0	0	0.0709	0.497516	0.034276
TCONS_00006485	0	0.068403	0	0	0.993588	0	0	0.123361	0	0.146895
TCONS_00002906	0	0	0	0	0	0	0	0	0	0.911107
TCONS_00002907	0	0	0	0	0	0	0.471119	0	0	0
TCONS_00002908	0	0.020249	0.565995	0.023985	0	0	0	0	0	0
TCONS_00002909	0	0	0.200856	0	0	0.178195	0	0	0.488503	0
TCONS_00002897	0.372191	0.243062	0	0.771875	0	0.23783	0.086195	0.09253	0	0.366359
TCONS_00002900	0.350217	0.07909	0.31874	0.029315	0.442131	0.23208	0.153861	0.107168	0	0.118257
TCONS_00002903	0.311977	0.128752	0.181744	0.113473	0.561669	0	0.674565	0.231218	0.228682	0.009216
TCONS_00006471	0.250453	0.994659	0.474695	0.656131	0.156545	1.39527	0.467487	0.789171	0.297858	0.130638
TCONS_00002904	0.031419	0.029708	0.1038	0.061163	0.212782	0.253854	0.288261	0.433874	0.364654	0
TCONS_00006498	0.011352	0	0.031254	0.770445	0.195281	0.066019	0.113566	0	0	0
TCONS_00002934	0.099333	0	0	0.29535	0	0	0	0	0.572295	1.23372
TCONS_00006503	0.072743	0	0	0	0.719297	0.055593	0	0	0.063192	0
TCONS_00006499	0.296105	0.272165	0.131379	0	0.201428	0	0	0.392987	0.057533	0.100656
TCONS_00006492	0.723449	0.221292	0.092958	0.457107	0.475202	0.417527	0.281884	0.491747	0.698083	0.484474
TCONS_00002940	0.170842	0	0.578134	0	0	0	0	0	0.345562	0
TCONS_00002943	0.709606	0.121099	1.01588	0	0.315069	0	0	0.038275	0.208123	0.093813
TCONS_00006522	0	0.5418	0	0	0.192732	0.225767	0	0	0.492967	0
TCONS_00006520	0.085236	0.483562	0.173964	0	0	0	0	0.147386	0	0.399803
TCONS_00006521	0.485766	0.076551	0	0	0.082244	0.188329	0.480956	0	0	0
TCONS_00002955	6.50584	4.98631	13.278	5.56542	10.337	10.3752	8.56995	3.00037	4.7359	8.55964
TCONS_00006528	0.379891	0	0.122915	0.110614	0.274054	0	0.077163	0.460881	0	0.193099
TCONS_00006535	0.214004	0.491955	0	0.222192	0.330779	0.695494	0.239056	0.236736	0.024697	0.282771
TCONS_00006540	0	0	0	0.450463	0	0	0	0.404282	0	0
TCONS_00002970	0	0.544682	0	0	0	0	0	0	0.056572	0
TCONS_00002975	0.475753	0	0	0	0	0	0	0	0.091016	0
TCONS_00002974	0	0	0	0	0.144154	0.396113	0.074285	0.006962	0.376857	0.05686
TCONS_00006560	0.155216	0	0	0.078122	0	0	0.317473	0.821061	0.068828	0.24838
TCONS_00006558	0	0.048742	0.170307	0	0.209469	0	0.298417	0	0	0
TCONS_00006562	1.91602	2.72363	4.24517	1.92875	2.27497	2.54399	2.36828	1.7965	3.4688	2.86597
TCONS_00002984	0.503478	0.21687	0	0.744029	1.26223	1.01936	0.525132	0.159546	0.662309	0.233179
TCONS_00006572	0.445286	0.392362	0.295347	0.15903	0.400372	0.243936	0.258031	0	0.621299	0.128951
TCONS_00006580	0.066649	0.378114	0	0.232383	0.033176	0.071317	0.048636	0.291904	0	0.033833
TCONS_00002996	0	0	0	0	0.53002	0.184749	0	0	0	0
TCONS_00006610	0.303928	0	0	0.058168	0	0	0.160221	1.00546	0	0
TCONS_00002999	0.353789	0.60994	0.972716	0.264752	0.425586	0.411144	0.572698	0.118011	0.154768	0.57171
TCONS_00006622	0.062534	0.059128	0	0.17176	0.063525	0.727325	0.113118	0.056123	0.111658	0
TCONS_00003000	0.223297	0.165223	0.534957	0.068731	0	0	0.143676	0	0.062401	0
TCONS_00006627	0.373547	2.54899	4.68991	5.91162	1.82831	2.84923	0.819955	0.396808	0.580392	1.72686
TCONS_00003008	4.38054	0	0	2.98843	1.02384	0.272301	0.164012	0.13945	0.069828	0.479649
TCONS_00006623	0.351041	0	0.273183	0	0	0.230198	0	0.05871	0	0
TCONS_00003031	0.081062	0.801816	0.102762	0	0	0.111822	0	0.019457	0.07237	0.250087
TCONS_00006636	0.704541	1.96131	2.84712	2.10051	0.376703	0.862025	0.425875	0.929373	2.50936	0.780848
TCONS_00003046	0.34678	0.105113	0.155284	0.053512	0.481572	0.004565	0.226907	0.002503	0.728632	0.152686
TCONS_00003048	0.621494	0.192728	0.248641	0.461636	0.15795	0.75863	0.142611	0.275716	0.129885	0.080645
TCONS_00003052	0.162936	0.189924	0.298733	0.367904	1.18158	0.388572	0.130163	0.318298	0.128881	0.116669
TCONS_00003053	0.24495	0.000407	0.118031	0.402589	0.177928	0.515662	0.264111	0.114628	0.308855	0.025865
TCONS_00003058	0.079466	0.303809	0	0.158933	0.080726	0	0.476977	0.356597	0	0.080679
TCONS_00006659	0	0	0	0	0	0	0.672002	0	0	0
TCONS_00003072	0	0	0	0	0	2.48998	0	0	0	0
TCONS_00003074	0	0.182755	0	0.138852	0.534312	0.064599	0.593103	0.334141	0.244953	0.289275
TCONS_00006682	0	0.107956	0	0	0.167464	0	0.112954	0.493166	0	0
TCONS_00003073	0.289027	1.10897	0.058095	0.484787	0.253827	0.049029	0.907563	0.341564	0.062849	0.216201
TCONS_00003076	0.153882	0.0485	0.087932	0.05061	1.35097	0.428952	0.102099	0.092071	0	0.051556
TCONS_00003077	0.033722	0.16004	0	0.033398	0.493758	0.109368	0	0	0	0
TCONS_00006675	8.59675	4.38209	0	0	0	0	0	1.8753	1.6386	0
TCONS_00006705	0.103908	1.15229	0.173808	0	0.330066	0.309268	0.309205	0.051924	0.35867	0
TCONS_00006718	0.69688	0	0	0	0.088343	0	0.08758	0.078572	0	0
TCONS_00003109	0	0	0.094489	0	0.087163	0.994631	0	0.145798	0	0.17074
TCONS_00003106	0	0.183309	0	0.031182	0.205894	0	0.379699	0	0.057492	2.24976
TCONS_00006715	0.478625	0.675379	0.129256	0.808364	0.815613	0.301713	1.03595	0.593919	0.684585	0.68763
TCONS_00003104	0.244068	0.693767	0.306498	0.246942	0.374483	0.191053	0.386045	0.350846	0.512548	0.49422
TCONS_00006724	0.439601	0	0.085525	0	0	0	0	0	0	0.238033
TCONS_00006725	0	16.6339	0	1.95718	0	0	17.3209	0	4.94349	0
TCONS_00006729	0	0.028225	0	0.079958	0	0	0	0.42961	0	0
TCONS_00006731	0	0	0	0	0	0	0.534445	0	0	0
TCONS_00006726	0.362275	21.0373	0	3.64892	0	0	18.6182	0	4.54339	0
TCONS_00006728	0.215407	0.210214	0.163221	0.629669	0.449939	0.084757	0.609334	0.207734	0.066162	0.225717
TCONS_00006739	0.204567	0	0	0	0.093178	0	0.314324	0	0.060878	0
TCONS_00003129	0.60874	0.17283	0.062469	0.367202	0.128412	0.272387	0.100641	0.217507	0.198155	0.124269
TCONS_00006744	0.480797	0	0	0	0	0	0	0	0	0
TCONS_00006749	0	0	0	0	0	0	0	0	0.440116	0
TCONS_00006750	0	0.229834	0.097258	0.155162	0.545709	0.138531	0	0	0.108505	0.146837
TCONS_00006748	0.313247	0.191769	0.280425	0.4847	0.247663	0.126633	0.106325	0.119217	0.229632	0.083836
TCONS_00006752	0	0.33166	0	0	0.102339	0.479338	0.249439	0	0.245291	0
TCONS_00006755	0.701275	0.489639	0.433538	0.699868	0.327617	0.408803	0.375511	0.50347	0.150116	0.342565
TCONS_00003137	0	0.171148	0	0.471122	0	0	0.141309	0	0	0
TCONS_00006766	0.55209	0	0	0	0	0	0.194272	0	0	0
TCONS_00003154	0.354842	0.929898	0.360689	0.456225	0.730924	0.530376	1.21088	0.705954	0.489432	0.599397
TCONS_00003156	0	0	0	0	0	0.572163	0	0	0	0
TCONS_00006769	0.06924	0	0.114375	0.013617	0.17561	0.074699	0.249073	0.129476	0.400155	0.001875
TCONS_00006770	0.22984	0.164335	0.187819	0.244459	0.118805	0	0.373955	0.109334	0.431419	0.123683
TCONS_00003161	0	0.670089	1.44493	0.630719	1.36648	0	0.974655	0	0.851731	0.206741
TCONS_00006773	0	0.263987	0	0	0	0	0.586121	0.320149	0	0.144866
TCONS_00003162	0	0	0.653605	0	0	0	0	0	0	0
TCONS_00003164	0	0.790827	1.25248	0.551864	0	0	0	0	0	0.756929
TCONS_00003175	0.090461	0.171068	0.173005	0.063926	0	0	0.557844	0	0	0.084188
TCONS_00003176	0.180605	0.768458	0	0	0.024157	0	0.234194	0	0	0.084958
TCONS_00006778	0	0	0.782786	0	0	0.137791	0	0.199891	0.098011	0
TCONS_00006788	0.148698	0.138287	0.105577	0.366854	0.089689	0	0	0.06541	0.131008	0
TCONS_00003187	0	0	1.53145	0	0	0	0	0	0	0
TCONS_00003198	0	0.009332	1.56849	0	0.412718	0.007542	0	0.011768	0.218824	0
TCONS_00003227	0	0	0	0.701999	0.616163	0	0	0	0	0
TCONS_00003183	5.64245	0	0.237814	0	0.333509	0	6.18837	0	0	0
TCONS_00003197	0.169502	0.340075	0	0	0.36623	0.354374	1.09916	0.305765	0.064611	0
TCONS_00006790	0.02789	0	0.061428	0.02789	0.056665	0	0	0	0.291495	0.563304
TCONS_00003220	1.63859	0.228758	0.110898	0.096571	0	0.031234	3.27605	0.324974	0	0.36256
TCONS_00003221	0.299183	0.082648	0	0	0.48936	0.370834	0.380402	0.690758	0	0
TCONS_00003209	0.665062	0.170485	0.069984	0.41417	0	0.414265	0.113164	0	0	0.900286
TCONS_00003225	0.628373	0.567271	2.67067	0.09694	1.38191	0.180366	1.17352	0.777824	0.350994	0
TCONS_00006794	0.057777	0	0.105621	0	0.082171	0.232513	0	1.39695	0	0
TCONS_00003239	0.44148	0	0	0	0	0.064185	0	0	0	0.099355
TCONS_00003249	0	0.055355	0	0.124721	0	0	0	0.003007	0.477765	0
TCONS_00003248	0.278258	0.028622	0.165676	0.181466	0.052376	0	0.437937	0.116382	0	0.16514
TCONS_00006827	0.705528	0.310059	0.676991	0.346537	0.427811	0.713667	0.236871	0.528797	0.429624	0.078213
TCONS_00006828	1.70237	0.756215	4.22591	0	1.04944	1.71178	0.203551	1.03724	0.115287	1.61854
TCONS_00003256	0.550804	0.200606	0.289804	0.428403	0.124341	0.071181	0.188283	0.7686	0.163915	0.776476
TCONS_00006836	1.21062	0	0	0	0	0	0	0	0	0
TCONS_00003265	0	0	0	0	0.070163	0	0.457359	0.073499	0.040501	0
TCONS_00003267	0.413225	0.066904	0.537137	0.163214	0.325758	0.480068	0.395131	0.679912	0.311643	0
TCONS_00003268	0.323911	0.119055	0.041309	0.092278	0.856052	0.210873	0.476907	0.429237	0.169456	0.171251
TCONS_00003270	0.452506	0.419413	0.178876	0.328111	0.488694	0.30133	0.557384	0.291315	0.246767	0.100458
TCONS_00003273	0.515386	0	0	0	0	0	0	0.639859	0	0
TCONS_00003271	0	0.982805	0	0.038133	0	0	0	0	0	0
TCONS_00006841	0.026055	1.40464	0.1603	0	0.026751	0.678254	0.08868	0	0.169358	0
TCONS_00006842	0.175495	0	0.287285	1.78151	0	2.45177	0	0	0	0
TCONS_00006843	0.455572	0.171712	0.20889	0.584096	0.123313	0.524577	0.284129	0	0.611305	0
TCONS_00006844	0.148033	0.727196	0.357302	1.06994	0	1.4101	0.111296	0	0.949184	0
TCONS_00006840	0.097655	0.294117	0.354963	0.490916	0.194311	0.359995	0.213311	0	0.734735	0
TCONS_00003276	0.076865	0	0	0	0	0	0	0	0.547154	0
TCONS_00006851	0	0	0	0	0	0	0.443283	0	0	0
TCONS_00006846	7.61646	7.18819	13.1533	10.7746	13.213	11.9643	9.37594	8.29489	11.1624	9.95412
TCONS_00006864	0	0.065477	0.10399	0	0.187697	0.054915	0.581349	0	0	0
TCONS_00003284	2.76787	2.09336	2.46	1.85107	2.66123	3.39479	3.16626	3.01417	0.6562	1.89674
TCONS_00003285	2.99209	1.00756	1.77441	0.969343	1.45365	1.68287	2.2775	2.11682	0.721677	2.78484
TCONS_00003286	1.3659	1.72741	1.14803	0.372631	1.6248	1.02881	1.2742	1.14637	1.06479	1.17047
TCONS_00003304	0	0.269438	0	0.772145	0	0	0	0	0	0.58436
TCONS_00003305	0.054009	0.025705	0	0.511094	0.013716	0.03162	0.24849	0.288149	0.036244	0.726915
TCONS_00003306	0.083989	0	0	0.503373	0.027587	0.076847	0.557354	0	0.037492	0.19726
TCONS_00006884	0.09902	0	0	0	0.439894	0	0	0	0.233872	0
TCONS_00003315	1.00493	0	0	0	0	0.701289	0	0	0.162089	0
TCONS_00003314	0.201157	0.161187	0	0.280711	0.519525	0.198274	0	0	0	0
TCONS_00003328	0.015963	0.420475	0.027374	0.135461	0.501322	0.092039	0.281262	0.207944	0.168171	0.015281
TCONS_00003330	0.063927	0.664898	0.066175	0	0.018616	0.05056	0.523873	0.334295	0	0
TCONS_00003329	0.760631	0.221416	0.177874	0.115027	0.327673	0.337423	0.236943	0.026298	0.036321	0.180952
TCONS_00006887	0.576944	0.425087	0	0	0	0	0.046051	0	0	0.134426
TCONS_00006933	1.1651	1.7661	0.930517	1.31982	1.17226	0.730698	0.730787	1.24016	1.49382	0.748042
TCONS_00006934	1.527	0.100758	0.070916	0.508163	0.065563	0.164096	1.91989	0.067577	0.335537	0.043683
TCONS_00006948	0.069336	0	0.768682	0	0.212724	0	0.099481	0	0	0
TCONS_00006967	0.259255	0	0	0.463592	0.150844	0	0	0	0	0.488752
TCONS_00003388	1.44423	1.81023	2.93138	1.96547	1.95664	1.11785	0.21988	0.720542	1.07218	0.55442
TCONS_00006975	0.128481	0.181094	0.143643	0.161742	0.033126	0.642997	0	0.115504	0.076276	0.131766
TCONS_00006978	0	0	0	0.314563	0	0	0	0.118352	0.25579	0.272216
TCONS_00003408	0	0	0	0	0.767883	0	0	0	0	0
TCONS_00006994	0.027588	0.078571	0.329435	0.005651	0.100622	0.095876	0.188576	0.11306	0.265886	0.239261
TCONS_00003419	0	0.37585	0.014511	0.007247	1.20137	0.076629	0.203144	0	0.176459	0.055073
TCONS_00007003	0.424546	0.066904	0.271166	0	0.107819	0	0.424221	0	0	0
TCONS_00007001	0.343576	0.435553	0.338588	0.256883	0.618605	0.202518	0.467906	0.212652	0.483756	0.351975
TCONS_00003436	0	0.059272	0.240692	0.564172	0.127359	0.407319	0.064427	0.28861	0	0.031821
TCONS_00003431	0	0.443258	0	0	0	0	0	0	0	0
TCONS_00003435	0	0.171104	0.161	0.175331	0.100656	0.289047	0.597706	0.347147	0.105144	0.219265
TCONS_00003432	0.531113	0	0	0	0	0.016731	0.024603	0	0	0.65828
TCONS_00003433	0.54292	0	0	0.51307	0.502747	0	0	0	0	2.01949
TCONS_00007011	0.671615	0	0	0	0	0	0	0	0	0.836411
TCONS_00003427	0.699032	0	0	0.078595	0.40056	0.232407	0.102685	0	0.119589	0
TCONS_00007021	14.8598	13.9963	11.1445	7.96917	11.5191	12.5023	7.80695	10.3765	14.939	10.1654
TCONS_00007024	0	0	0	0	0	0	0	0	0	0.6293
TCONS_00007022	0.546139	0.668855	0.971392	0.230019	0.287634	0.636796	0.313859	0	1.09919	0.329413
TCONS_00007044	0.252654	0.682774	0.075813	0	0.338691	0.138492	0.275147	0.221102	0.440863	0.356837
TCONS_00007031	0	0.096904	0.377712	0.096337	0.531083	0.238401	0.289492	0.411148	0.182995	0
TCONS_00007033	0	0	0.450238	0	0.360633	0	0.001368	0	0	0.627137
TCONS_00007041	0	0	0	0.063343	0.944145	0.865994	0	0	0	0
TCONS_00003452	0.912917	1.01404	0.819816	1.54991	1.15755	1.61574	1.36385	1.55545	1.53249	0.687589
TCONS_00003453	0.202021	0	0.141041	0	0.706105	0	0.066249	0.928011	0.743863	0
TCONS_00007071	0.174504	0	0.07943	0.349007	0	0.260469	0.615177	0	0.363517	0
TCONS_00007069	0.072314	0.088842	0	0.14758	0.665145	0	0.085952	0.198234	0	0
TCONS_00007070	0.173694	0	0	0	0.456144	0.239073	0.07094	0.156568	0	0
TCONS_00007072	0	0	0.072063	1.16018	0	0.510624	0.310921	0.202183	0	0
TCONS_00007054	0	0	0	0	0	0.383184	0	0.442775	0	0
TCONS_00003486	0	0	0	0	0	0	0.31968	0.282749	0	0.087943
TCONS_00003488	0	2.35843	3.59237	1.12478	5.32893	0.091394	4.42539	0.252729	3.07072	4.92786
TCONS_00007059	0	1.13931	0.099098	0.325457	0.030268	0.034888	0.406331	0	0.180763	0.35357
TCONS_00003487	0.214145	0.303214	0.058068	0.252168	0.654807	1.29249	0.110969	0.090784	0.575793	0.492733
TCONS_00007058	0.039001	0.165759	0.344742	0.183656	0.406658	0.135325	0.019305	0	0.331886	0.039729
TCONS_00003489	0.109873	13.7729	0.766784	5.36686	1.42938	0.909575	1.42742	0.852455	1.38446	4.80364
TCONS_00003507	0.115787	0	1.24409	0	0	0.504328	0.628475	0.581604	1.1656	0.597878
TCONS_00007113	0.079148	0.165592	0	0	0.442217	0	0.268021	0.555285	0.710836	0
TCONS_00007125	0.472965	0	0	0.462269	0.277996	0	0.196265	0	0	0
TCONS_00007120	0.019533	0.057123	0.532012	0.060413	0.245483	0.070266	0	0.061087	0	0.061335
TCONS_00007122	0.078838	0	0.213709	0.434002	0	0.275085	0	0.063893	0.141239	0.046044
TCONS_00007129	0.356256	0	0.304364	0.119016	0.160936	0.230095	0.243015	0.070972	0.070837	0.120833
TCONS_00007132	0.056727	0.101608	0.574544	0	0.59168	0.209085	0.304651	0.630292	0	0.118835
TCONS_00007131	0.470562	0.295568	0	0	0.318398	0	0.005154	0	0.11081	0
TCONS_00003534	3.99566	1.80898	3.11635	1.001	0.622433	2.77488	3.22154	2.80477	6.44546	11.0293
TCONS_00007134	0	0	0	0	18.8935	10.3717	49.6532	12.241	20.4922	0
TCONS_00007137	0	2.42204	0	8.69427	0	0	0	1.7816	0	0
TCONS_00007139	0	4.67921	1.2035	0	15.1683	8.75753	13.9935	22.4786	2.72813	0
TCONS_00003535	0	0.319536	0.465599	0	0	0	0	0.134514	0	0.285043
TCONS_00003537	0	0	0.030258	0	0	0	0	0.177985	0	0
TCONS_00007136	15.158	12.1291	5.88332	0	6.08031	4.20874	0	5.28534	0.594192	6.35618
TCONS_00007138	1.77906	0	4.86637	0.035771	2.66275	0.789993	0.02376	3.63824	0.182714	0.336183
TCONS_00007135	1.40675	0	0	0	16.0391	13.5493	18.9139	6.36456	20.69	0
TCONS_00007133	5.25189	0	7.73369	12.3739	13.0674	0	0	22.4923	0	1.74737
TCONS_00003539	0	0	0	0.490377	0.166051	0	0.168001	0	0	0
TCONS_00003544	0.527073	0	0	0	0.361117	0	0	0	0.087106	0
TCONS_00003543	0	0.346455	0.506072	0	0	0	0	0	0	0
TCONS_00003561	0.164426	0.698833	0.179244	0	0.165346	0	0.681099	0	0	0
TCONS_00003562	0.45894	0.364655	0.032804	0.059577	0	0	0.398008	0	0	0
TCONS_00003547	7.45048	3.25676	5.72131	4.51276	6.30406	10.6626	4.81865	5.19937	8.27245	7.25268
TCONS_00003550	6.99273	0.249639	1.91597	2.34471	4.39202	7.19033	3.8895	2.49688	7.83876	2.68077
TCONS_00007159	0.161668	0.103158	0.269613	0.135505	0.139702	0.535938	0.056537	0.098738	0.36489	0.121377
TCONS_00003570	0.527937	0.652465	0.426351	0.479953	1.22928	1.05602	0.807938	1.58242	0.588712	0.862579
TCONS_00003593	0.129692	0.061737	0	0.190513	0.199893	0.21118	0.137891	0.236404	0	0.534405
TCONS_00003594	0.206831	0.185468	0.431299	0	0.863464	0.037517	0.246625	0	0.28953	0.687052
TCONS_00003595	0.131657	0.609086	0.473758	0.036059	0.270002	0	0.093266	0	0.189746	0.336761
TCONS_00003591	0	0.146227	0.170875	0	0.350599	0	0.717379	0	0	0
TCONS_00003596	0.249235	0.41035	0.262829	0.298601	0.23749	0.970631	0.355571	0.317576	0.647827	0.570053
TCONS_00110539	0	0	0	0	0	0.11146	0	0	1.47027	0
TCONS_00110540	0.25229	0.300517	0.092542	0.280114	0.056721	0	0.056428	0	1.48589	0
TCONS_00110541	0.122765	0.449304	0.191104	0.33043	0.359818	0.266022	0.052355	0.209234	0.563472	0.025859
TCONS_00110542	0.111043	1.02502	0.69768	0.335762	0.347781	0.494523	0	1.06264	0.654353	1.13686
TCONS_00106332	0.010415	0	0	0.131183	0	0.03866	0.284686	0.119325	0.41248	0
TCONS_00106335	0.079712	0	0	0	0	0.092712	0	0.428284	0	0
TCONS_00110549	0	0.631825	0	0	0.060037	0.619406	0.062901	0	0	1.10404
TCONS_00110550	0	1.23286	0	0	0.081853	0.257966	0	0	0	1.00233
TCONS_00110552	0	0.723934	0	0	0	0.833083	0.022723	0	0.078277	0.309638
TCONS_00106305	0.459998	0.110778	0.091379	0.270189	0.069866	0	0.259378	0	0.898038	0
TCONS_00106308	0.633993	0.57992	0.77389	1.35621	0.700421	0.278965	0.164415	0.043436	5.07706	0.097839
TCONS_00106307	0.418144	0.132018	0.446336	0.612386	0.770545	0.755591	0	0.195105	0.899673	0.076386
TCONS_00110547	2.2736	1.58763	0	0.118174	0	0	0	0.074464	0	0.879256
TCONS_00110548	0.012738	0.3344	0	0	0.043618	0	0.022065	0	0	0.577454
TCONS_00110558	0.151238	0.139111	0.125016	0	0.44838	0.17605	0	0.033622	0.533767	0
TCONS_00106346	0.681199	1.74819	1.1341	0.66913	0.644594	1.45763	0.571676	2.06684	2.0857	1.65058
TCONS_00106347	0.660074	2.38992	0.302403	0	0.110389	2.18318	0	1.23225	0.09767	0.223632
TCONS_00106348	0.118656	0	0.037254	0.151475	0.615508	0	0	0	0.005077	0
TCONS_00106350	2.11188	1.68121	0.762442	0.82094	1.05749	0.888224	1.44087	0.568925	0.930846	1.92234
TCONS_00106369	2.32161	0	0	0	0	0	0.90612	0	0.184034	0
TCONS_00110587	0	0	0	0	0	0	0.484087	0	0	0.117954
TCONS_00106385	0.058168	0.055	0.339074	0.321863	0	0.248066	0.008768	0.144433	0.406446	0.231893
TCONS_00110586	0	0	0	0.159503	0.628823	0.303195	0.103907	0.32856	0	0
TCONS_00110614	0	0.213704	0	0.302706	0	0	0	0.99963	1.55076	0
TCONS_00106395	8.81723	0	5.59005	0	7.66163	12.9037	10.5369	14.7927	0	15.1587
TCONS_00106402	1.06092	0.804991	0.716543	4.05534	2.34972	2.57035	2.73277	4.12153	7.34156	2.33023
TCONS_00110604	0.200284	0.715964	0.257248	0.238007	0.248685	0.58012	0	0	0	0.433522
TCONS_00110616	0	1.00777	0	0	0	0	0	0.564233	0	0
TCONS_00110618	0	0	0	0	0	0	0.473329	0	0	0
TCONS_00110620	0	0.182784	0.375412	0.836657	0	0	0	0.273889	0.276136	0
TCONS_00110624	0	0.609163	0	0.245478	0	0	0	0	0.136635	0
TCONS_00110615	0.220119	0	0.025209	0	0	0	0.494937	0.037666	0.018734	0.314104
TCONS_00110617	0.973337	0.453764	1.41821	0.069991	0.813625	0.040703	0.820301	0.188027	2.32802	0.490071
TCONS_00106450	1.38507	1.99411	0.834276	1.42639	0.731257	2.39908	0.741549	1.23414	1.85039	2.16759
TCONS_00110623	0.27389	0.778323	0.636526	0.971459	0.882418	0.285063	0.661031	0.544719	0.41153	0.621254
TCONS_00110647	0	0	0	0	0	0	0.491557	0	0	0
TCONS_00106507	0.483394	0.125868	0.074865	0.119567	0.34403	0.215753	0.384	0.34942	0.227015	0.138272
TCONS_00110700	0	0	0	0.193603	0	0	0.58515	0.175472	0.275322	0.232297
TCONS_00106482	0	0	0	0	0	0.101365	0	0	0	0.538084
TCONS_00106488	0	0	0	0	0.226172	0	0.174672	0.687372	0	0
TCONS_00110691	0	0	0	0.664434	0	0	0	0	0	0
TCONS_00106480	0.245523	0.079343	0	0.183365	0.219738	0	0.475941	0.036818	0	0.157767
TCONS_00106481	0.328251	0	0.139137	0.087946	0.122057	0.571957	0.190965	0.998301	0	0
TCONS_00110673	0.078454	0.124962	0.601296	0	0.076488	0.256598	0.966519	0.141766	0	0.561302
TCONS_00110675	0.175746	0.164486	0.388386	1.20881	0	0.201294	0.266816	0.466245	0.548757	0.223413
TCONS_00106497	0.95654	0.308264	0.373181	0.239135	0	0.139067	0.737336	0	0.196414	0
TCONS_00110689	0.946062	0.60289	0.771311	1.47752	0.666198	1.05428	0.474282	1.42368	1.12256	0.617348
TCONS_00110723	0.150489	0.446856	0	0.350291	0.045235	0.047254	0.045766	0.378587	0.664952	0
TCONS_00106546	0	0	0	0	0	0	0.39484	0.139676	0	0.066143
TCONS_00106547	0	0	0	0	0	0	0	0	0	0.559875
TCONS_00106548	0	0.13621	0.024448	0	0.526224	0	0	0	0.103064	0.111695
TCONS_00106549	0	0.426548	0	0.218793	0.00802	0.262345	0.167301	0.230776	0.650438	0.68281
TCONS_00106545	0.260781	0.304823	0	0.306235	0.43068	0.28573	0.166595	0.145797	0.177513	0.656069
TCONS_00106515	0	1.23225	0	0.039672	0	0	0	0	0	0
TCONS_00106614	0.195963	0.123389	0.072094	0.15581	0.461098	0.297545	0.385097	0.352138	0.078318	0.265864
TCONS_00110878	0	0	0	0	0.637312	0	0.081674	0	0	0.41189
TCONS_00110885	0.461713	0.000584	0.040387	0.001379	0.000471	0.000449	0.000661	0.000924	0.205414	0.000588
TCONS_00110887	0.128077	0.033048	0	0.030964	0.035744	0	0.133564	0.18863	0.439786	0.031436
TCONS_00110886	1.19288	0.111171	0.065836	0.29852	0.36034	0.208601	0.736926	1.2312	1.8517	0.903162
TCONS_00106551	0	0.265434	0.042728	0	0.039924	0	0.072131	0.121508	0.375935	0.285009
TCONS_00106552	0	0.222178	0.093888	0.043252	0.063372	0	0.189784	0	0.499761	0.251652
TCONS_00106557	0	0.299933	0	0.36189	0.625318	0.448016	0.354384	0.001149	0	0.584641
TCONS_00106560	0	0.015866	0	0	0	0.127282	0.663602	0	0	0
TCONS_00106564	0	0.07777	0	0	0	0.323982	0	0	0.463513	0
TCONS_00106575	0	0	0	0	0.341858	0.044979	0.11092	0	0	0
TCONS_00106585	0	0.763588	0	0.743468	0	0	0.019076	0	0	0.020047
TCONS_00106587	0	0.462551	0	0.290498	0.310853	0	0	0	0	0
TCONS_00106593	0	0	0.611731	0	0	0.115324	0.152263	0.00691	0.279937	0
TCONS_00106597	0	0	0.788123	0	0	0	0	0	0	0
TCONS_00110862	0.428029	2.52712	0	1.9873	1.61387	1.16307	1.85848	2.45865	0.075425	1.12596
TCONS_00106561	0.266901	0.059842	0.961686	0.252949	0.081313	0.086098	0.028037	0.144912	0.033701	0.144186
TCONS_00106567	0.094931	0.203236	0.0716	0.05084	0.256733	0.048176	0.09979	0.108486	0.634342	0.645551
TCONS_00106572	0.040785	0	0	0	0.010629	0.019877	0	0	0	0.417179
TCONS_00106558	0.545278	0.08299	0.140083	0.126953	0.092974	0	0.039078	0.093493	0.113664	0.247524
TCONS_00106556	0.410948	0	0.180109	0.029207	0.019	0.17639	0	0.981087	0.483955	0
TCONS_00106566	0.394048	0.267361	0.221081	0.172294	0.053325	0.040703	1.58869	0.234615	0.159214	0.053294
TCONS_00106600	0.370936	0	0.205957	0	0	0	0.159154	0	0	0
TCONS_00106553	0.360623	0.473538	0	0	0.235894	0	0.09576	0.030316	0	0.630785
TCONS_00106594	0.276377	0.100766	0	0	0.091004	0	0.051429	0.61605	0	0.609997
TCONS_00106592	0.229897	0	0.469575	0	0.130719	0	0.000587	0	0.329926	0
TCONS_00106562	0.229569	0.107809	0	0	0	0	0.468889	0.206034	0	0.91365
TCONS_00106583	0.212849	0.036645	0.050958	0.057181	0	0.100498	0.10401	0.598715	0.424278	0.051082
TCONS_00106554	0.189366	0	0.175215	0	0	0	0.112634	0	0.62095	0
TCONS_00106589	0.101471	0	0	0.029146	0.126497	0.036097	0	0.144871	0.571013	0.029591
TCONS_00106571	0.096343	0.07805	0	0	0.642316	0	0.706923	0.47422	0.392991	0
TCONS_00106582	0.038957	0.518815	0.441614	0	0	0.57356	0	0.010499	0	0.09891
TCONS_00106565	0.86581	0.159956	0	0.018797	0.108754	0.262345	0.405696	0.196531	0.329075	0.190836
TCONS_00106588	0.772232	0.645778	0.051623	0.264345	0.014451	0.081784	0.256084	0.260969	0.062176	0.081235
TCONS_00106590	0.754754	0.033323	0	0.524602	0	0	0.552172	0.164183	0.460426	0.4097
TCONS_00106609	0.533894	0.810576	1.50731	1.35644	0.37921	1.0198	1.1034	1.252	0.656521	0
TCONS_00106608	0.400793	0.084968	0.30719	0.431341	0.012762	0	0.129618	0.200011	0.235227	0.280763
TCONS_00106579	0.316325	0	0.479432	0	0	0.125743	0.222978	0.331919	0.024373	0.107914
TCONS_00106569	0.182348	0.062509	0.836036	0.218672	0.321031	0.126745	0	0.04238	0.33078	0.055318
TCONS_00106559	0.103077	0	0.630626	0	0.020942	0	0.019422	0.018845	0	0.097351
TCONS_00106584	0.091692	0.601828	0	0.261322	0.021907	0.064975	0.162301	0.342724	0	0
TCONS_00106596	0.032609	0.551914	0.281779	0.065219	0	0.075855	0	0.029266	0.029113	0.453788
TCONS_00106612	0.62425	0.40672	0.1505	0.500852	0.248096	0.496271	0.310134	0.486724	0.268972	0.301381
TCONS_00106643	0.25323	0.066208	0	0.27721	0	0.141128	0.191748	0.513076	0.284738	0.071578
TCONS_00110906	0.806464	0.669208	0.566741	0.485696	0.328247	0.706169	0.576595	1.05296	0.543783	0.329958
TCONS_00106648	0.11427	0.047453	0	0	0	0.123477	0	0	0.566611	0
TCONS_00106650	0.108973	0	0	0	0	0	0.055253	0	0.769875	0
TCONS_00110911	0.243469	0.105565	0	0.488283	0.102485	0.438062	0	0	0	0
TCONS_00106646	0	0	0	0	0	0	0.732506	0	0	0
TCONS_00106665	0.105415	0.545544	0	0	0.209174	0	0.203729	0	0.122345	0.105928
TCONS_00106663	0	0	0	0	0	0	0	0	0.476064	0
TCONS_00106662	0.071741	1.2574	0.873251	0.143481	0.510631	0.500642	0.221201	0.38611	0.22915	0.219721
TCONS_00106669	0	0	0	0	0	0	0.518777	0	0	0
TCONS_00106671	0	0.274285	0.106366	0	0.051192	0	0	0.086975	0.027686	0.389623
TCONS_00110949	0.202561	0.229834	0	0	0	0	0	0.272692	0	0
TCONS_00110951	0	0.28645	0.250216	0.135823	0.373664	0.150046	0.077842	0.271892	0.171747	0.312958
TCONS_00110954	0	0	0	0	0	0.239351	0.528767	0	0	0
TCONS_00110957	0.075328	0.514853	0.474021	0	0	0	0.231523	0.318065	0	0
TCONS_00106685	1.48092	0.702327	0.710574	0.994579	1.76423	0.750481	0.966635	1.02302	1.0612	1.61367
TCONS_00110956	0.378579	0.036841	0	0	0	0	0	0.105852	0.045128	0.481116
TCONS_00106686	0.118211	0.051546	0.108008	0.118606	0	0	0	0.126628	0.574625	0.119614
TCONS_00106692	0.80898	0.102019	0.341403	0.99471	0.169803	0.352363	0.204956	0.385984	0.630508	0.165922
TCONS_00110969	1.08193	0.89321	0.803713	0.886505	0.97462	0.732675	0.856929	1.89386	0.777842	0.979427
TCONS_00110968	0	0.443998	0	0.16122	0	0	0	0	0	0.171627
TCONS_00106703	0.179351	0	0.686013	0.233156	0	0	0	0	0	0
TCONS_00106701	0.160412	0.111064	0.226214	0	0.054066	0.006733	0.057579	0.100559	0	0.284391
TCONS_00106711	0	0.644318	0.801162	0.217444	0	0.331881	0.079757	0	0	0
TCONS_00106709	0	0.124653	0.115804	0.229275	0.137283	0.615386	0.06367	0.117922	0.039561	0.402881
TCONS_00106708	0.142962	0.373601	0.313289	0.502163	0.399926	0.167113	0.147672	0.235979	0.231535	0.140282
TCONS_00106717	0.104606	0.146212	0.207496	0.77837	0.081843	0.018136	0	0	0.172857	0
TCONS_00106726	0.125105	0.359353	0.133596	0.150378	0.278246	0.156531	0.015585	0	0.056973	0.369497
TCONS_00111028	0.385048	0.091824	0.212461	0.241405	0.074113	0.603033	0.244279	0	0.039225	0.097443
TCONS_00111029	1.20862	0.03175	1.86829	1.39116	1.04326	3.6235	1.31307	0	0.620094	0.923678
TCONS_00106744	0	0	0	0	0	0.576109	0	0	0	0
TCONS_00111032	0.238216	0	0.178301	0	0.033049	0.372103	0.383026	0	0.305984	0
TCONS_00111034	0.043754	0	0.351869	0	0.107635	0.900331	0.210992	0	0.94552	0
TCONS_00111009	0	0	0.491443	0.099954	0.017024	0	0	0.336663	0.004984	0
TCONS_00111008	0.163809	0.332818	0.021011	0.828197	0.172593	0	0.047336	0.143626	0.856346	0.37021
TCONS_00111010	0.103463	0.19937	0.692393	0	0	0	0	0.616667	0.226418	0
TCONS_00111011	0.49205	0.12508	0.68265	0.211947	0.277344	0	0.515795	0.67056	0.86372	0.32032
TCONS_00111007	0.352102	0.837667	0.498669	0.913212	0.247629	0	0.491463	0.598988	0.752122	0.083044
TCONS_00106737	0.332979	0.191969	0.429178	0.502639	0.177375	0.056837	0.433573	0.595248	0.102491	0.171787
TCONS_00111019	0.333677	0	0.146983	0.961381	0	1.21241	0.405135	0.059894	0.715751	0.734454
TCONS_00111037	0	0	0.179642	0	0.616014	0	0	0	0	0
TCONS_00106745	0	0.140749	0.267747	0.595425	0.30344	0	0.142792	0.399005	0.392484	0.37631
TCONS_00111039	0.004593	0	0.008549	0	0	0.017429	0.020388	0	0.548552	0
TCONS_00111038	1.03668	0.218633	0.728798	0.043044	0.096325	1.23342	0.779851	0	0.713758	0
TCONS_00111035	0.249243	0	0.599149	0	0	0.780744	0.120453	0	0.250327	0
TCONS_00111045	0.515738	0.281335	0.347324	0.474478	0.714404	0.505564	0.154746	0.497283	0.619585	0.362097
TCONS_00111056	0.769444	0.140459	0.075959	0.263268	0.094496	0.275379	0.263727	0.067418	0.161156	0.052923
TCONS_00111064	3.6308	0.701478	0.466165	0.499508	1.74009	0.891162	0.415907	3.15599	0.151834	1.41704
TCONS_00106758	0.604588	0.418627	0	0.128395	0.163913	0	0	0.397351	0	0
TCONS_00111065	0.106302	0.050142	0	0	0.629664	0.228293	0.172714	0	0	0
TCONS_00106762	0	0	0.196147	0	0.106753	0	0.546747	0	0	0
TCONS_00106764	0	0.673453	0	0	0	0	0.134401	0	0	0
TCONS_00111088	0	0.249459	0.2828	0	0.042239	0.102853	0.043036	0.287501	0.352918	0
TCONS_00111075	0	0	0	0	0	0	0.637696	0	0	0
TCONS_00111079	0.781911	0.047843	0.696133	0	0.833841	0.324089	0.162515	0.234311	0	0.155184
TCONS_00111080	0.329951	0.031428	0.145196	0.066478	0.776388	0.036855	0.066275	0.148957	0.063108	0.168056
TCONS_00106786	0.100103	0.181729	0	0	0	0	0.100826	0.127573	0.089369	0.50409
TCONS_00111107	0.917664	0.043529	0	0	0	0.214179	0.089269	0	0.040826	0.02929
TCONS_00106790	0.484786	0.222832	0.177758	0.241586	0	0	0.123596	0	0.27981	0
TCONS_00111109	0.20379	0.07793	0.139875	0.338709	0.08602	0.064673	0.006672	0.758948	0.045359	0.012895
TCONS_00111113	0.076667	0.181349	0.169994	0.231032	0.128754	0.288976	0.325666	0.349441	0.27413	0.412247
TCONS_00111124	0	0	0	0	0	0	0	0.982577	0	0
TCONS_00106799	0.072343	0.478365	0	0	0	0	0	0	0	0
TCONS_00111120	0	0	0	0	0	0.01605	0	0.422341	0	0.121552
TCONS_00111121	0	0	0	0	0.212151	0	0.071547	0.062477	0	0.775081
TCONS_00111119	0.147885	0	0	0	0	0.0258	0	1.42661	0	0.721254
TCONS_00111122	0.013669	0	0	0	0.007916	0	0	0.270471	0	0.712433
TCONS_00106828	0.068144	0.566146	0	0.034072	0.138449	0.079257	0	0.214052	0	0.069184
TCONS_00106824	0	0	0	0	0	0	0.532657	0	0	0
TCONS_00106825	0.008046	0	0	0	0.490393	0	0	0	0	0
TCONS_00111135	0.417072	0.220108	0.302066	0.122831	0.154574	0.179762	0.118865	0.20431	0.687605	0.184536
TCONS_00111126	0	0	0.1038	0.188515	0.380454	0	0.387505	0	0	0.192669
TCONS_00106818	0	0.27484	0	0	0	0.826663	1.18691	0	0	0.059044
TCONS_00106823	0.270554	0.026345	0	0.107021	0	0.870661	0.087966	0	0	0.225361
TCONS_00106827	0	0.34656	0	0	0	0	0	0.384656	0.339098	0.450143
TCONS_00106835	0	0.194686	0.336423	1.56051	0.510352	0.375942	0.204414	0.238402	0.848371	0.22499
TCONS_00106837	0	0.514194	0.153556	0.187333	0	0	0	0	0.344236	0
TCONS_00106836	0.216476	0.061901	0.913916	0.247027	0.033252	0.078174	0.067285	0	0.131895	0
TCONS_00106842	0	0	0	0	0.579338	0	0	0	0	0
TCONS_00106840	0.822564	0	0.303135	0.152746	0.164489	0	0.135355	0.350226	0	0
TCONS_00111162	0	0.893398	0	0.630612	0	0	0.155122	0	0	0
TCONS_00106847	0	0.180929	0.38094	0.464095	0.235329	0.819233	0.047055	0	0	0
TCONS_00106846	0.104509	0.062814	0	0.96948	0.224865	0	0	0	0	0
TCONS_00106849	0.260124	0.914721	0	0.185183	0.464321	0.324157	0	0	0	0
TCONS_00106845	0.259089	0.821202	0.331164	1.37777	0.158421	0.57077	0	0.047393	0	0.038191
TCONS_00106859	0	0	0	0	0	0	0	0.431424	0	0
TCONS_00111181	0.104222	0.249692	1.03606	0.363368	0.321914	0.122857	0.432088	0.234474	0.187036	0.160864
TCONS_00106873	4.66539	5.15306	4.6582	3.77099	2.53068	2.74929	3.7684	1.7546	2.31705	5.59735
TCONS_00106889	0.265145	0.214438	0.022802	0.119232	0.455972	0.384351	0.085409	0.560108	0.148877	0.148422
TCONS_00111191	2.44498	1.71252	0.824887	2.71766	3.52941	2.14941	1.64832	3.15252	2.92409	1.42542
TCONS_00111190	0.231478	0.149939	0.299557	0.082996	0.392604	0.059568	0.029128	0.63953	0.449449	0.140514
TCONS_00111189	0.684239	0.521064	0.561167	0.325187	0.803606	0.803182	0.544042	0.890148	0.358011	0.233755
TCONS_00106899	0.514876	0	0	0	0.041372	0	0.445805	0	0	0.441048
TCONS_00111209	0	0	0.434983	0.226261	0	0.269993	0.7093	0.158889	0.09675	0.20298
TCONS_00111213	0	0	0.492489	0	0.172635	0	0	0	0	0
TCONS_00111214	0	0.035548	0.23671	0.448968	0	0.096326	0.210001	0.366509	0.015323	0.168167
TCONS_00111210	0.141361	0	0.319425	0	0.061118	0.085337	0.755602	0.106675	0	0.132097
TCONS_00111212	0.449716	0	0.257528	0.046208	0	0	0	0.518929	0	0
TCONS_00111215	0.200389	0	0.684874	0.108285	0	0	0.170564	0.335116	0	0.126365
TCONS_00106910	0.040103	0	0.176654	0.079939	0.162685	0.089556	0.243183	1.3509	0	0
TCONS_00111230	0	0.244621	0.073682	0.171285	0	0.181061	0.378219	0.30805	0.149534	0.033965
TCONS_00106934	0.072751	0.137577	0.080116	0.145502	0.088685	0	0.14755	0.278927	0.572861	0.73763
TCONS_00111249	0.276453	0.228913	0.078336	0	0.089096	0.127864	0.6177	0.371804	0.209284	0.073451
TCONS_00106951	0	0.159133	0	0	0	0	0	0.417637	0	0
TCONS_00111259	0.830663	0.760524	0.888032	0.228501	0.430987	0.839641	0.808324	0.548648	1.2843	0.616003
TCONS_00106953	0.20457	0.688152	0.465296	1.3489	0.074224	0.216638	0.333294	0.616206	0.224444	0.107243
TCONS_00111266	0.113876	0.120085	0.659874	0.381517	0.309204	0.311679	0.061323	0.206544	0.136974	0.20769
TCONS_00111265	0	0	0	0.442741	0	0	0	0	0	0
TCONS_00106980	1.36122	0.065645	0	0	0	1.28498	0	0	0	0
TCONS_00111268	0.778948	0.222179	0.341368	0.609925	0.505661	0.402638	0.031015	0.796195	0.300168	0.64174
TCONS_00106984	1.12235	0.527431	0.77351	0.752508	0.837913	1.23631	0.634879	0.770964	0.52796	0.753388
TCONS_00111278	0	0.076074	0.06084	0	0	0	0.496151	0	0	0
TCONS_00107016	0	0.06512	0.151687	0	0.056903	0.63922	0	0	0	0.212563
TCONS_00111284	0	0.344751	0.334603	0.342126	0.047122	0.634697	0.044136	0.162888	0.134004	0.121336
TCONS_00111283	0.346029	0.148023	0.643808	0.041858	0.207507	0	0.470939	0.19084	0	0.169989
TCONS_00111288	0.157277	0	0	0.12251	0	0	0	0	0.048775	0.502566
TCONS_00111289	0.283987	0.21185	0.283186	0.498709	0.069833	0.173235	0.280069	0.361036	0.892744	0.24169
TCONS_00107027	0.113195	0	0.569302	0	0	0.149814	0	0	0	0
TCONS_00111304	0	0.122985	0.800984	0.163642	0	0	0.180008	0	0	0
TCONS_00111305	0	0	1.1122	0	0	0.749103	0	1.07367	0.19486	0.257683
TCONS_00111309	0.005569	0	0	2.86182	1.85303	0	0	0.131626	0	0.455569
TCONS_00111306	0.665829	0.084613	0	0	0.107003	0	0.238866	0	0.602497	0
TCONS_00111307	0.591759	0.667981	2.78125	0	0	3.75945	0.520731	1.60015	0.477872	1.44343
TCONS_00111308	0.734242	0.199257	0.805126	0.109967	0.110068	1.32541	0.437316	0.671864	0.588586	0.785197
TCONS_00111315	0	0.019456	0.049985	0.045389	0.553308	0.211167	0.466504	0.284609	0	0.321347
TCONS_00111322	0.100984	0.031509	0	0.081797	0.26672	0.528537	0	0.151807	0	0.158401
TCONS_00107040	0	0	0.230438	0	0	0.066161	0.213501	0	0.538685	0.232558
TCONS_00107053	0.733408	0	0	0	0.3002	0.135751	0	0.166412	0	0
TCONS_00107052	0.584246	0.079724	0	0.167887	0.284437	0.195267	0.31481	0	0.050128	0.084846
TCONS_00107041	0.458729	0.434907	0.296602	0.18386	0	0.204548	0.280609	0	0	0
TCONS_00107056	0.213091	0	0.844789	0	0	0	0.120894	0.127751	0.061638	0
TCONS_00107059	0.288565	0	0	0.272694	0.149501	0.083906	0	0.123448	0	0.795414
TCONS_00107058	0.257396	0	0	0.434791	0.446395	0	0.380138	0.191466	0	0.617999
TCONS_00107061	0.43602	0	0	0	0	0	0	0	0	0
TCONS_00111357	0	0	0.111605	0.351437	0.053136	0	0.294001	0.438148	0.049131	0.070807
TCONS_00107060	5.6956	6.47683	4.20265	10.6768	5.66878	5.16832	6.05742	5.94458	4.15993	4.91468
TCONS_00111375	0	0.530867	0	0	0	0	0	0	0	0
TCONS_00111377	0.176748	0.055467	0.746687	0.428919	0	0.02038	0	0	0	0
TCONS_00111370	0	0	0	0	0	0	0.508832	0	0	0
TCONS_00111373	0	0.109528	0	0.119956	0	0	0.206181	0.729955	0.188576	0.222637
TCONS_00111371	0.197374	1.39471	0.317941	1.53279	0.40776	0.610539	0	0.007538	0.394599	0.371995
TCONS_00111372	0.099974	0.220678	0.070574	0	0.064668	0.074537	0.301667	0.40261	0	0.027327
TCONS_00111385	0.01598	0.052154	0.25546	0	0.037181	0.077345	0.156827	0.341899	0.033827	0.102057
TCONS_00111383	0.007988	0.231611	0.302005	0.196584	0	0	0	0.189174	0.475409	0
TCONS_00111384	0.155461	0	0.273674	0.217026	0	0	0.515419	0.18303	0	0.00792
TCONS_00111390	0.183193	0.057867	0	0	0.37178	0	0.189541	0	0	0.248539
TCONS_00111391	0.267861	0	0.049603	0.079825	0.708427	0.135003	0.51472	0.173662	0.306479	0.222566
TCONS_00107090	0.852362	0	0	0	0	0	0	0.114237	0	0
TCONS_00107091	0.068871	0	0	0	0.267683	0.261205	0.074375	0	0.534663	0
TCONS_00111393	0	0	0.129214	0	0	0	0	0	0	1.35766
TCONS_00111394	0.157961	0.298714	0	0	0	0.026333	0	0	0.282047	0
TCONS_00111397	0	0	0	0	0	0	0	0	0	0.472447
TCONS_00111380	0	0	0.519042	0.284996	0	0	0	0.211679	0.100722	0
TCONS_00107125	0	0.115151	0	0	0.168081	0	0.031076	0	0.553376	0.219146
TCONS_00111402	0.151254	0.426901	0	0	0.181053	0.30493	0	0.214522	0	0.038391
TCONS_00111413	0	0	0	0	0.233209	0	0.780709	0	0	0
TCONS_00107144	0	0	0	0.095386	0.321785	0.216486	0	0	0	0
TCONS_00107141	0.138667	0.418202	0.147201	0.343095	0.548417	0.213254	0.329401	0.007477	0.246771	0.249991
TCONS_00107148	0	0	0	0	0	0.243791	0	0.402438	0	0
TCONS_00107183	0.036172	0	0.151368	0.361475	0	0.042071	0.665213	0	0.148333	0.438728
TCONS_00111435	0	0	0	0.717404	0.365604	1.25786	0	0.093359	0.294622	0
TCONS_00111436	0.52001	0	0	0	0.007917	0.128111	0	0.078043	0.095231	0
TCONS_00107189	0	0.152149	0	0	0	0	0.080487	0.433249	0	0
TCONS_00111453	0	0.702175	0.244603	0.16373	0.151434	0.173383	0.152702	0	0.066543	0.075673
TCONS_00111454	0	0.244199	0	0	0.088936	0	0	0.235717	0.048199	0.090069
TCONS_00111457	0	0	0.147747	0	0.107329	0	0.161448	0	0	0.510795
TCONS_00111476	0.114532	0	0.167891	0	0.68961	0.257599	0	0.101429	0	0
TCONS_00111477	0.341971	0.307891	0.208752	0.203751	0.381926	0.269439	0.115454	0.595921	0.352782	0.135186
TCONS_00111481	0	0	0	0	0	0	0.082735	0.401365	0	0
TCONS_00111485	0	0	0	0	0.02628	0	0	0	0.401951	0
TCONS_00111488	0	0	0	0.173381	0.225055	0.208659	0.130976	0.648899	0.347204	0.215999
TCONS_00111490	0	0	0.099794	0.04531	0.181351	0.627472	0.019869	0.161032	0	0.09139
TCONS_00107210	0	0.171844	0	0.074929	0.121463	0	0	0.261835	0.426988	0.06798
TCONS_00111487	0.060397	0	0.076656	0.200528	0.03161	0.509087	0.118824	0.114188	0.449486	0.025039
TCONS_00111486	0.053582	0.101327	0.236027	0.192538	0.163295	0.403422	0.388616	0.048089	0.313597	0.1088
TCONS_00111496	0.431405	0	0	0	0.012703	0	0	0	0	0
TCONS_00107211	0.270926	0	0.556742	0.248981	0	0.07706	0.179563	0.193914	0.056513	0.03856
TCONS_00107212	0.071344	0.124573	0.029332	0.570753	0	0	0	0	0	0
TCONS_00107216	0	0	0	0.270637	0.29221	0.263212	0.238155	0	0.616703	0.078505
TCONS_00111506	0.412983	0.294216	0.228444	0.051861	0.026341	0.081028	0.106603	0.171747	0.184736	0
TCONS_00107221	0.079176	0	0	0	0.957519	0	0	0	0.320895	0
TCONS_00107222	0.230252	0	0	0	0.194918	0	0	0.095404	0	0.156883
TCONS_00111521	0.066876	0	0	0	0.17878	0.307038	0.397332	0.060283	0.705468	0.139963
TCONS_00111522	0.688709	0	0	0	0.050723	0	0	0.074172	0	0
TCONS_00111526	0.73151	0	0	0	0	0	0	0.079445	0	0
TCONS_00111528	0.089832	0.243806	0.549589	0	0	0	0	0	0	0
TCONS_00111527	0.017385	0.616424	0	0	0	0	0	0.270045	0	0
TCONS_00107234	0	0	0	0	0.783165	0	0	0	0.117007	0
TCONS_00111546	0	0.038885	0	0.655808	0	0	0	0	0	0
TCONS_00111547	0.366783	0	0.345799	0	0.004021	0	0	0	0	0.602778
TCONS_00111544	0.430756	0.176514	0.498612	0.217882	0.142257	0.088113	0.096309	0.250706	0.177192	0.015891
TCONS_00107231	0.276797	0.530473	0.205681	0.125356	0.363314	0.619943	0.230611	0.354393	0.528173	0.281339
TCONS_00111560	0	0	0	0	0	0	0.072873	0	0.534787	0.866709
TCONS_00107238	0.483326	0.049836	0.472666	0.072033	0.160272	0.278112	0.336406	0.39199	0.457853	0.229031
TCONS_00107239	0.649725	0	0	0.239315	0.036851	0	0.083472	0	0	0
TCONS_00107247	0.521749	0	0	0	0	0	0	0	0	0
TCONS_00111570	0	0	0	0	0.07416	0.720925	0	0	0	0
TCONS_00107255	0	0	0	0	0.019776	0.062392	0.594908	0	0	0
TCONS_00107258	0.203359	0	0.179157	0.101679	0	0.11432	0.104504	0.726392	0	0
TCONS_00111608	0	0	0	0	0.110235	0	0.669179	0	0	0.104296
TCONS_00111610	0.465474	0	0	0	0	0	0	0	0	0.083515
TCONS_00107270	0.349543	0.132916	0	0	0	0.246892	0.436341	0.061387	0.429983	0
TCONS_00111609	0.526712	0	0	0	0	0	0.062778	0	0	0.134811
TCONS_00111611	0.491935	0.115898	0.338586	0	0	0.03576	0	0	0.054166	0.062431
TCONS_00107271	0.008025	0.046218	0	0.109435	0.222339	0.229108	0.610364	0	0.34586	0.44368
TCONS_00107266	0	0	0.543301	0	0	0	0	0	0	0
TCONS_00107261	0.530559	0.254341	0.135391	0.022553	0.351211	0.047985	0.412154	0	0.956425	0
TCONS_00107262	0.292922	0	0	0	0.583437	0	0.336049	0	0.955967	0.074597
TCONS_00107265	0.177825	0.326086	0.117044	0.615581	0.410212	0.067202	0.074453	0.168531	0.172484	0.206555
TCONS_00107267	0.028381	0	0	0	0.223727	0	0.51338	0.202072	0	0
TCONS_00111600	0.692817	0.55759	0.220044	0.427268	1.51535	0.52313	0.811869	0.386588	0.244064	0.515044
TCONS_00111601	0.096884	0.249937	0.229632	0	1.63466	0	0.428034	0	0.83725	0.500563
TCONS_00111598	6.07277	3.82826	1.55981	3.38937	3.39207	2.02232	2.75086	3.77241	2.59633	3.02951
TCONS_00111592	1.08431	1.99304	0.601394	0.16991	0.444387	0.204366	0.566617	1.01056	0.975685	0.817341
TCONS_00111591	0.491748	1.26992	0.425661	1.1735	1.65455	0.453107	2.01851	0.955639	1.21459	1.29471
TCONS_00111626	0.246849	0.337852	0.407307	0	0.062691	0.071777	0.410371	0.221542	0.115149	0.156636
TCONS_00107291	0.474141	0.215251	0.861017	0.244895	0.338118	0	0.992378	0.321784	0.262763	0.667343
TCONS_00107289	0.868383	0.303065	0.317292	0.612125	0.16321	0	0.246589	0.013939	0.385843	0.202263
TCONS_00111630	0.521636	0.263287	0.570614	0.208144	0.282397	0.525472	0.392318	0.074764	0.186447	0.106014
TCONS_00107300	0.408529	0	0.255109	0	0.889904	0.17477	0	0.207439	0.419224	0
TCONS_00111636	0.48499	0.040768	0	0.173624	0	0.148089	0	0.108038	0.155007	0.439217
TCONS_00111637	0.809971	0.286003	0.049932	0.468779	0.157768	0.566081	0.40718	0.155472	0.481051	0.154465
TCONS_00107301	0.137438	0.337974	0.182706	0.566304	0.588016	0.064322	0.112921	0.471187	0.049373	0.334826
TCONS_00111655	0	0	0	0	0	0	0.467737	0	0	0
TCONS_00107313	0.296061	0.346054	0	0.062381	0.310886	0.456567	0.569727	0	0.070297	0
TCONS_00111663	0	0	0	0	0	0	0	0.044374	0	0.620087
TCONS_00111678	0.263804	0	0.349278	0.528614	0	0	0.116421	0.047894	0.195515	0
TCONS_00107327	0	0.105939	0.069709	0	0.009003	0.147248	0.097589	0	0.392577	0
TCONS_00111676	0.073578	0.314786	0.133077	0	0	0	0	0	0	0.138348
TCONS_00107328	0.522831	0	0.325263	0	0	0	0	0	0	0.095219
TCONS_00107344	0	0	0.0602	0.11119	0.397412	0	0	0	0	0.622957
TCONS_00107343	0.417794	0.278091	0.462329	0.273087	0.09596	0.268721	0.474488	0.395779	0.111674	0.305145
TCONS_00111699	0	0.242508	0.336456	0.076637	0.008823	0.095077	0	0	0.410516	0.085587
TCONS_00107353	0.166522	0.164978	0.064587	0.219934	0.15448	0	0	0.358492	0.44413	0
TCONS_00107352	0.526487	0	0	0.135282	0.143376	0	0.119177	0.928204	0.182472	0
TCONS_00107351	0.522436	0.536526	0	0.206592	0.137263	0	0.319319	0.339577	0.284236	0.045881
TCONS_00107358	0.12435	0.324419	0.171632	0.310875	0.17723	0.308367	0.254648	0.139969	0.68021	0.047501
TCONS_00107355	0	0.34264	0	0.121261	0.455505	0	0.376881	0	0	0
TCONS_00107354	0.380053	0.467221	0.620836	0.33994	0.646954	0.755339	0.444685	0	0.686459	0.563108
TCONS_00107361	0.310229	0	0.341893	0	0.348238	0.947161	0	0	0	0
TCONS_00111722	0.429406	0	0	0	0	0	0	0	0	0
TCONS_00111723	0.776739	0	0.132583	0.222881	0	0.037642	0	0	0	0.332412
TCONS_00107359	0	0	0	0.010555	0.010722	0.012276	0	0.352468	0	0
TCONS_00107360	0.090177	0.102318	0.079445	0.468918	0.164891	0.461486	0.258521	0.263477	0.335018	0.036621
TCONS_00111725	0	0.091229	0.107325	0.014619	0	0	0	0.611396	0.258996	0.197893
TCONS_00107367	0.132308	0.064505	0.627366	0	0.490819	0	0.235239	0.476564	0	0
TCONS_00107368	0.134766	0.120592	0	0	0	0	0.101807	0.057232	0.569317	0.119127
TCONS_00107369	1.08907	0.735048	0	0.118242	0.158048	0.180955	0.231328	0.558526	0.129177	0.008951
TCONS_00107371	0.064091	0	0	0	0	0.21984	0.501854	0.233007	0	0
TCONS_00111731	0	0	0	0	0	0	0.6097	0	0	0
TCONS_00107379	1.19339	1.2388	3.64239	1.39392	1.35671	0.066456	1.767	0.793509	1.64442	1.47919
TCONS_00107394	0	0	0	0.103433	0.513787	0.16616	0.142989	0	0	0
TCONS_00111743	0	0.063126	0	0.031004	0.123464	0.177178	0.316957	0.049715	0.098356	0.502802
TCONS_00111744	0.279714	0.23392	0.1689	0.689296	0.254301	0.410082	0	0	0.119615	0
TCONS_00111745	0.341305	0	0.477813	0	0	0.085824	0	0.233996	0	0
TCONS_00111746	0.122663	0.409117	0.134633	0	0.069135	0	0	0.328984	0.272868	0
TCONS_00111741	0.518374	0.773926	0.624738	1.05896	0.715225	0.729235	0.483117	0.865508	1.13386	0.623043
TCONS_00111758	0	0	0	0.132444	0	0	0	0.15611	0	0.531588
TCONS_00107427	0.689373	0	0.977324	0	0.353865	0	0	0.068015	0.311586	0.050619
TCONS_00107437	0.01942	0.095597	0	0.060062	0.122028	0	0	0.053904	0.073462	0.487829
TCONS_00111780	0	0.288718	0.092043	0.222883	0.282832	0	0.085712	0	0.150233	0.111257
TCONS_00111776	0.14751	0	0.105398	0.296006	0.196457	0	0.217525	0.37458	0.078399	0.600049
TCONS_00111777	0.135041	0.091375	0.130123	0.161205	0	0	0.390354	0.108698	0.225676	0.039845
TCONS_00111781	0.113533	0	0.057457	0.527801	0.063602	0.28303	0.027027	0.228136	0	0
TCONS_00107447	0.200873	0	0.652719	0	0.052056	0.092976	0	0.022688	0.264732	0
TCONS_00107449	0	0.134421	0.412615	0	0.096279	0	0	0.084209	0.08405	0.232219
TCONS_00107450	0.25372	0	0.187731	0.0841	0	0.099137	0.262813	0.068338	1.05901	0
TCONS_00111793	1.049	1.60667	1.05814	1.12097	2.05677	0.67388	1.45969	1.75803	0.565454	1.73326
TCONS_00107452	0	0	0	0	0	0	0.508832	0	0	0
TCONS_00107468	0	0	0	0	0.027866	0	0.535081	0.078572	0.059097	0
TCONS_00107469	0	0.485968	0	0	0	0.017933	0	0	0	0
TCONS_00107470	0	0	0	0	0	0.529314	0	0	0	0
TCONS_00111802	0.149472	0	0.62404	0.566671	0.287347	0.048414	0	0.317966	0	0
TCONS_00111815	0.518016	0	0	0	0.147766	0	0	0.199817	0.066257	0.150694
TCONS_00111820	0.128013	0.191445	0.140973	0.194793	0.289777	0.091815	0.032673	0.229395	0.451623	0.152711
TCONS_00111822	0.460232	0	0.627427	0.207075	0.091077	0.213936	0.186274	0.077868	0.154921	0
TCONS_00107473	0.248574	0	0.493065	0.081718	0.115832	0.265241	0.464473	0.511333	0.050899	0
TCONS_00111818	0.448449	0.161694	0.150754	0.22039	0.229598	0.259136	0.099479	0.241917	0.259562	0
TCONS_00111823	0.389163	0.28294	0.175075	0.230183	0.345605	0.321268	0.472999	0.082634	0.321131	0.156733
TCONS_00111816	0.357407	0.380954	0.442631	0.287921	0.228139	0.267902	0.532065	0.43498	0.10282	0.329149
TCONS_00111824	0.188813	0	0.250063	0.222083	0	0	0.103441	0.4479	0.211637	0.265164
TCONS_00111825	0.841918	0.372684	0.568372	0.474661	0.665922	0.357963	0.370338	0.214238	0.495486	0.271151
TCONS_00111827	0.312071	0.310901	0	0.293538	0.140593	0.092827	0.061445	0.563374	0.368277	0
TCONS_00111826	0.273084	0.281584	0.330023	0.090642	0.181075	0.301815	0.205042	0.252223	0.267938	0.164678
TCONS_00107483	0	0.199885	0.215963	0	0.085765	0	1.12667	0.357974	0.026707	0
TCONS_00111833	0.226566	0.46149	0.144959	0.262496	0.209174	0.974192	0.084358	0	0.073572	0.114232
TCONS_00107486	0.509469	0	0	0.03653	0.041067	0	0.068331	0	0.036744	0.037087
TCONS_00111839	0.230081	0.077411	0.245562	0.05752	0.253595	0.133802	0.091042	0.205632	0.4834	0.117965
TCONS_00111840	0.256772	0.579252	0.379976	0.3324	0.279524	0.316294	0.2124	0.104599	0	0.16617
TCONS_00111841	0.359652	0.226898	0.094144	0.375364	0.387598	0.437321	0.3587	0.303532	0.068154	0.453763
TCONS_00111842	0.592194	0.126184	0.04855	0.380696	0.474488	0.412294	0.292077	0.22056	0.264215	0.511109
TCONS_00111854	0	0	0.379216	0	0	0.301895	0	0.077651	0	0
TCONS_00107501	0	0	0	0	0	0	0.346301	0	0.220644	0.501834
TCONS_00107500	0.139227	0	0.76661	0	0.093818	0.161393	0.061054	0	0.435044	0.375997
TCONS_00107517	0.10178	1.05266	0.336251	0.20305	0.141132	0	0	0.837178	0.06815	0
TCONS_00107516	0.794381	0	0	0	0.062171	0.284725	0.691488	0.549261	0	0.124269
TCONS_00107509	0	0.074987	0.089457	0	0.019454	0	0	0.658239	0.025209	0
TCONS_00107507	0.277748	0.320583	0.187485	0.033218	0.320652	0.211991	0.401234	0.573534	0.154765	0.022643
TCONS_00107513	2.62157	0	1.39536	1.05092	0.62554	1.37666	1.2733	2.27174	0	0.937767
TCONS_00107510	0.298089	0	0	0	0	0	0.043259	0	0	0
TCONS_00107508	0.552089	0	0.003717	0	0.066426	0.425372	0.123171	0.108654	0	0.273858
TCONS_00107511	0.43102	0	0.509486	0.028601	0	0	0.596014	0.466349	0	0.031941
TCONS_00111866	0.959598	0.457354	0.183284	0.207754	0.260691	0.265812	0	0.266878	0.471143	0.130325
TCONS_00107524	0.335489	0.525899	0.307278	0.472422	0.55079	0.846072	0.811909	0.587532	0.291601	1.46003
TCONS_00111881	0.185828	0	0	0.528421	0	0	0.055215	0.414966	0.235881	0.009388
TCONS_00111882	0.132614	0.125391	0.072776	0.066307	0.372042	0	0.681491	0.103744	0.44398	0.637737
TCONS_00111890	0	1.01448	0	0.22991	0.311407	0	0.078766	0.06878	0	0
TCONS_00111893	0	0.028267	0	0	0	0	0	0	0.741394	0
TCONS_00107549	0.181642	0.22843	0.276471	0	0.227333	0.194228	0	0.129243	1.18606	0.574067
TCONS_00107553	0	0	0	0	0.676573	0	0	0.102279	0	0
TCONS_00107552	0.012822	0	0.680774	0	0	0	0.125661	0	0	0
TCONS_00107551	0.65308	0.54053	0.528702	0.33855	0.098098	0.532143	0.616711	0.439558	0.474676	0.727865
TCONS_00107567	0.223861	0.18172	0.025259	0.114224	0.193236	0.361743	0	0.283388	0.176638	0
TCONS_00111911	0	0	0.207501	0	0.350012	0.394819	0.55984	0	0.73987	0
TCONS_00111921	0.109823	0.093918	0.280986	0	0.199451	0.052756	0.299993	0.229981	0.165808	0.07012
TCONS_00107578	0.335387	0.375908	0.508914	0.567347	0.179158	0.850397	0.184334	0.078872	0	0.398168
TCONS_00111920	0.139508	0.206924	0.112468	0.288728	0.119594	0	0.113436	0.472998	0.274586	0.074255
TCONS_00111930	0.511628	0	0	0	0	0	0	0	0	0.042595
TCONS_00111932	0.21416	0	0.302334	0.052832	0.151905	0	0.436341	0	0.191197	0
TCONS_00111938	0	0	0	0.521748	0	0	0	0	0.112828	0
TCONS_00111937	0.483052	0.18864	0.215943	0.428393	0	0.343298	0	0.201128	0.267782	0
TCONS_00107610	0.574819	0.44797	0.047296	0	0	0	0.255785	0	0.005478	0
TCONS_00107614	0	0.292913	0	0	0.101297	0.414431	0	0.536961	0.271821	0
TCONS_00111968	0.769637	0.02555	0	0	0	0	0	0.066197	0	0
TCONS_00107626	0	0	0	0.116261	0.063309	0	0	0.027824	0.667254	0
TCONS_00111969	0.437992	0.18928	0.697355	0.536379	0.807614	0.782758	0.529475	0.143088	0.460712	0.394734
TCONS_00111977	0	0	0	0.463257	0	0	0.231715	0.101169	0.295024	0.155208
TCONS_00111976	0	0.160739	0.018401	0	0	0	0	0.586806	0	0
TCONS_00111984	0	0.042386	0	0.455403	0	0	0	0	0	0
TCONS_00107641	0.266578	0.416541	0.392293	0.457981	0.446314	0.879404	0.503422	0.869606	0.672638	0.089211
TCONS_00107651	0	0	0.02073	0.008264	0	0.440298	0	0	0	0.12325
TCONS_00107653	0	0.536701	0	0	0	0	0.15557	0	0	0
TCONS_00107652	0.332386	0.244625	0.185041	0.066359	0.221131	0.026127	0.201927	0.853347	0.022439	0.140482
TCONS_00107618	1.23639	0.651753	0.133955	0.183342	0	0.61444	0.111733	0	0.104925	0
TCONS_00111947	124.837	98.6097	110.577	90.4123	130.447	103.687	80.95	143.311	115.694	145
TCONS_00111951	64.2195	80.5142	67.4073	32.8012	45.5912	18.2366	43.7104	36.1932	41.0697	26.6087
TCONS_00107656	2.47484	3.49798	3.5429	1.95511	2.75239	2.80777	3.20882	2.21542	0.895156	0.544577
TCONS_00107655	0.639254	0.467937	2.5465	2.4981	1.5309	0.402051	1.6769	1.28229	2.87016	0
TCONS_00112026	0	0	0	0	0	0	0.487048	0.4253	0	0
TCONS_00107668	0.123464	0	0.674266	0	0.165521	0.201234	0.763952	0	0.449899	0
TCONS_00112029	0.234965	0.037841	0.087948	0	0.45913	0.031032	0.246794	0.056031	0.503546	0.030519
TCONS_00107673	0.052497	0	0	0	0	0	0.678412	0	0	0
TCONS_00112030	0.848095	0.416999	1.14848	0.995798	0.822686	1.02989	0.940672	1.00949	0.881669	0.470976
TCONS_00112032	0	0.000232	0	0	0.015957	0.000288	0	0	0	0.916303
TCONS_00112034	0	0.012878	0	0	0.814864	0.013151	0	0	0	0
TCONS_00107678	0.333186	0.673198	0.742556	0.61855	0.733499	1.00074	0.480199	1.35059	0.843866	0.694809
TCONS_00107677	0.203678	0	0	0.77601	0	0.495074	0.171645	0.631337	0.67	0.288527
TCONS_00107679	0.057921	0.084588	0.316087	0.200344	0.18196	0.070136	0.208561	0.269708	0.243855	0.249521
TCONS_00112033	4.00624	7.39517	4.95251	3.85047	0.820642	3.77459	0.583526	4.04857	2.00723	5.791
TCONS_00107680	0.175691	0	0	0.175691	0.469988	0	0.237954	0.104769	0.202166	0.172427
TCONS_00107686	0	0.24712	0.237464	0	0	0	0.211016	0.081699	0	0
TCONS_00107687	0.594658	0	0.135904	0	0.259833	0	0.014321	0	0	0.330413
TCONS_00107688	0.045985	0	0.256148	0.137421	0.129279	0.124383	0.16487	0.236587	0.100249	0.488587
TCONS_00112052	0	0	0	0	0	0.00168	0	0	1.32702	0
TCONS_00112054	0	0	0	0	1.37249	1.00323	0.83547	1.21238	0	1.39121
TCONS_00112053	0.048911	0.127096	0.040358	1.11064	0.007832	0.006037	0.010993	0.007602	0	0.008617
TCONS_00107691	0	0.107419	0	0	0.070271	0.352358	0	0	0.131853	0.092009
TCONS_00107690	0.590188	0.937731	0.641498	0.945945	1.31038	0.614687	1.3248	0.588908	0.751053	0.883707
TCONS_00112060	0.593714	0	0.21794	0	0	0	0.086107	0	0.706738	0
TCONS_00107699	0	0	0	0.194014	0	0	0	0	0.152966	0.511626
TCONS_00107698	0.55244	0	0	0	0	0.03534	0	0	0	0
TCONS_00107700	0.985217	0.66187	0.416878	0.743124	1.02343	0.822386	0.926359	0.939854	0.559061	0.459078
TCONS_00112081	0.936465	0	0.066486	0	0	0.122235	0	0	0	0
TCONS_00107702	0	0.061418	0.187824	0	0	0.61112	0	0.124789	0.291543	0
TCONS_00107703	0.545632	0	0	0	0	0	0	0	0	0
TCONS_00112086	1.15427	0.957742	0.960442	0.610176	0.402797	0.91098	0.901555	1.13035	2.54623	0.355327
TCONS_00112123	2.55886	0	1.37505	0	0.213301	1.86961	1.75954	1.84342	0	0.496466
TCONS_00107724	0.373258	0.176611	0.399067	0.093237	0.208951	0.650654	0.096146	0.285342	0.952815	0.185534
TCONS_00107738	0.129795	0	0	0.195134	0.466418	0	0	0	0	0
TCONS_00112130	0	0	0	0	0	0.608917	0	0	0	0
TCONS_00112137	0.032083	0.181405	0.846524	0.064165	0.130365	0.07463	0.461636	0.10692	0.142068	0.065145
TCONS_00112140	0.119944	0.48352	0.680791	0	0.065071	0.065002	0.181821	0	0.172714	0
TCONS_00112143	0.125716	0	0.400378	0.672105	0.212387	0.219925	0.269338	0.710725	0.085733	0.68433
TCONS_00112142	0.363684	0.434534	0.214224	0.318425	0.355782	0.155392	0.252996	0.176443	0.186694	0.031544
TCONS_00107750	0	0	0.229032	0	0	0	0.094613	0.458987	0	0
TCONS_00112163	1.27503	0	0	0.203858	0	1.3014	0	0.084474	0.663232	0
TCONS_00112164	0	0	0.183589	0	0	0	0.622171	0	0	0
TCONS_00107762	1.08952	0.396427	0.184683	0.282862	0	0.195055	0	0.225768	0.074861	0.276024
TCONS_00107764	0.450271	0.071195	0	0	0.14941	0	0	0.067577	0.134445	0
TCONS_00112173	3.51769	2.71179	2.01432	3.8096	2.1408	2.55179	3.1907	1.62462	2.04139	2.85544
TCONS_00112171	0.627415	0.380553	0.238102	0.320352	0.117276	0.546092	0.664825	0.867159	0.596976	0.045514
TCONS_00112179	0	0.062599	0	0	0	0.112112	0.549448	0.00977	0.267963	0.023025
TCONS_00112180	0	0.063575	0	0	0	0.079789	0.356054	0.334868	0.686327	0.028059
TCONS_00112181	0	0	0	0	0	0	0	0	0.411738	0
TCONS_00107774	0.305777	0.205695	0.281133	0	0.14955	0.499158	0.344592	0	0	0.123833
TCONS_00112178	1.32011	4.56093	1.61531	1.90766	2.23224	3.61744	2.0752	1.51294	0.850793	1.93629
TCONS_00112188	0	0	0	0	0	0	0.049368	0	0.556857	0
TCONS_00107779	0.031055	0	0.451803	0.031266	0	0	0.256213	0.054605	0.468503	0
TCONS_00112187	0.45846	0	0	0	0	0	0	0	0.136434	0
TCONS_00112191	0.560427	0.21468	0	0.042004	0.277929	0.594169	0.254357	0.288674	0.252026	0.109109
TCONS_00107785	0.417256	0.180843	0.742613	0.192332	0.552601	0	0.285265	0.591353	0.516469	0.389231
TCONS_00112246	0.276961	0.428603	0.1525	0.553921	0	0.482657	0.063525	0	0.120335	0.070297
TCONS_00112247	0.011777	0.133624	0	0	0	0.081089	0.080613	0.313702	0.189253	0.020565
TCONS_00107793	0	0.042779	0.621417	0.148927	0.066388	0.08478	0.040688	0	0.118933	0
TCONS_00107792	0.386963	0.421283	0.270595	0.41513	0.223498	0.215625	0.284232	0.420096	0.164506	0.369785
TCONS_00107794	0.240789	0.243587	0.362109	0	0	0.451205	0	0.569305	0	0
TCONS_00107820	0.107655	0.100443	0.117769	0	0	0	0.588403	0	0.419456	0
TCONS_00112265	0	0	0	0	0	1.22065	0	0	0.292887	0
TCONS_00112266	0	0	0	0	0	0.074447	0	0	0.730924	0
TCONS_00112267	0	0	0	0	0	1.42033	0	0	0.35579	0
TCONS_00107818	0	0.433427	0.280226	0	0.078595	0	0.033333	0	0.107002	0
TCONS_00107807	2.77639	2.27142	2.17822	4.07497	2.3684	2.07767	2.3159	2.74153	3.81259	3.04039
TCONS_00112268	0.079835	0	0.087917	0	0	0	0	0	1.03111	0
TCONS_00107829	1.46728	0	0	0	0	0	0.061161	0	0	0.879868
TCONS_00107826	0	0	0	0	0	0.250321	0	0.193157	0.384289	0
TCONS_00107835	0.039324	0.174356	0.161811	0.148529	0.202168	0.453668	0.449229	0.09324	0	0.029404
TCONS_00107837	0.029054	0.108963	0.286667	0.050308	0.558989	0.102056	0.228866	0.306076	0.10445	0
TCONS_00107836	0.335647	0.039837	0.185587	0	0.128398	0.495579	0.189951	0.453745	0	0
TCONS_00107853	0	0	0	0	0	0.071013	0.129269	0	0.435709	0
TCONS_00107854	0	0	0	0.155328	0.476581	0.538305	0	0.41065	0	0
TCONS_00107855	0	0	0.042662	0	0	0	0	0.723373	0	0
TCONS_00107858	0	0	0	0	0	0	0.48262	0	0.120178	0
TCONS_00112293	0	0	0	0	0.461293	0	0	0	0	0
TCONS_00112298	0	0.415419	0.140105	0.488542	0	0.118652	0.380945	0	0	0
TCONS_00107874	3.56622	4.63062	2.30208	16.8081	4.33375	2.59933	5.27144	3.00938	3.84635	8.90809
TCONS_00107878	0	0.402738	0	0	0.025537	0	0.150636	0.510828	0.07834	0
TCONS_00107898	0	0	0	0	0	0	0.455692	0	0	0
TCONS_00112315	0.087357	0.124964	0.512035	0	0.170899	0	0.108609	0.227615	0.115475	0
TCONS_00107902	0	0.522423	0	0	0	0	0	0	0	0
TCONS_00107900	1.49449	0.890758	0.593344	1.13084	1.05338	1.16203	1.23039	1.61889	1.11374	1.37026
TCONS_00107904	0.605608	0	0	0.131694	0	0	0.080721	0.164586	0.251054	0.121271
TCONS_00107901	0.410997	0.397074	1.35468	0.734786	0.764521	0.754217	0.404908	0.837832	1.53548	0.653864
TCONS_00107905	0.07302	0.52135	0.0763	0.026553	0.008429	0.46228	0.24476	0.016383	0.030743	0.059813
TCONS_00112319	0.222674	0.550867	0.394209	0.240247	0.242022	0.271977	0.059261	0.297551	0.426471	0.314243
TCONS_00112331	0.449158	0	0	0	0	0	0	0	0	0
TCONS_00107914	0.159183	0	0	0.487293	0	0.188922	0	0.072889	0.580059	0.399084
TCONS_00112335	0.598299	0	0	0	0	0	0	0	0	0
TCONS_00107928	0.120685	0	0	0	0	0	0.744227	0	0	0
TCONS_00107927	0.02805	0	0.591499	0.014025	0.04547	0	0	0.64274	0	0
TCONS_00112360	0.467449	0	0	0	0	0	0	0	0	0
TCONS_00107947	0.474808	0.127842	0.523458	0.118834	0	0	0.154705	0.049771	0	0
TCONS_00112367	0.463257	0	0.068021	0	0	0	0	0	0	0
TCONS_00107965	0	0	0.271131	0	0	0.145114	0.512929	0	0	0
TCONS_00107966	0	0	0	0	0	0.215229	0	0.166079	0	0.477039
TCONS_00112390	1.00539	0.434344	0.443592	0.738379	0.885859	0.986301	0.517849	0.645575	0.672036	0.736529
TCONS_00107969	0	0	0	0	0	0.670005	0	0	0	0
TCONS_00112413	1.30839	0	0	0.455093	0	0	0	0	0.046386	0
TCONS_00112416	0	0	0.274	0.345018	0	0.081415	0.489284	0.047043	0.117286	0.201414
TCONS_00108016	0.172788	0.069854	0.313324	0.578808	0	0.080955	0.067145	0.410972	0.065956	0.113438
TCONS_00108018	5.83861	0	8.87859	0.032568	0.398558	3.18113	0	3.2957	3.8021	0.825752
TCONS_00108022	0.329263	0.486452	0.236444	0	0	0.121271	0	0	0.222306	0
TCONS_00108019	0.29498	0	0	0.569703	0	0	0	0.09601	0.074597	0.086117
TCONS_00112454	0.148429	0	0	0.220169	0	0.046612	0	0.652737	0	0
TCONS_00112459	0	0	0.514773	0	0	0	0	0	0	0
TCONS_00112467	1.82424	0	0	0.456345	0.309182	0	0.048155	0.102561	0.306071	0
TCONS_00112488	0.756629	0.634283	0.045247	0.415069	0	0.782172	0.254812	0.299769	1.6467	0.255398
TCONS_00112489	0.998627	0	0	0	0	0	0	0	0	0.254878
TCONS_00108051	0.565545	0	0	0.37326	0	0	0	0	0.084151	0
TCONS_00108055	0.321756	0.305249	0	0	0	0	0	0	0.128737	0
TCONS_00108054	0.509018	0.192073	0.119967	0.427461	0.368132	0.691562	0.307206	0.49661	0.249	0.249292
TCONS_00108053	0.215873	0.414182	0.236243	0.235833	0.239755	0.437428	0.249039	0.544269	0.274251	0.30114
TCONS_00112498	0.728159	0.891761	0.798178	0.755907	0.0953	0.213229	0.481205	0.436634	0.591504	0.060648
TCONS_00108059	2.45348	3.18488	0	1.36301	3.74021	2.83855	0.88829	4.13268	2.80154	0
TCONS_00112516	0.197088	0	0	0	0	0	0.522599	0.1131	0.392465	0.328039
TCONS_00112515	0	0.05141	0	0	0.091104	0	0	0.42179	0.122749	0
TCONS_00108068	0	0	0	0	0	0.190721	0.54292	0	0	0
TCONS_00108079	0	0.51179	0	0	0	0	0	0	0	0
TCONS_00112531	0.10002	0.101327	0	0	0	0	0.164111	0	1.13565	0
TCONS_00112524	0	0	0	0	0	0	0	0	0.425238	0
TCONS_00112525	0	0	0	0	0	0	0.106931	0	0.437106	0
TCONS_00108077	0	0.12914	0.519623	0.035041	0	0	0.323681	0.219563	0.464228	0.164958
TCONS_00108078	0	0	0.154125	0	0	0	0.060951	0.494978	0.201366	0.240834
TCONS_00112527	0.447625	0.442171	0.22199	0.207959	0.053984	0.5163	0.229029	0.369462	0.16273	0.223003
TCONS_00108075	0.043039	0.257104	0.302855	0.241623	0.008963	0.039057	0.163034	0.494722	0.340805	0.264668
TCONS_00108087	0.129474	0.064432	0.150086	0	0.81777	0.310689	0	0.203452	0.176428	0
TCONS_00112535	0.51553	0.017747	0	0	0	0	0.140437	0	0	0.15143
TCONS_00112534	0	0	0	0	0	0	0.065235	0	0	0.44368
TCONS_00108082	0	0.111744	0.43716	0	0.282271	0.105491	0.034189	0.235543	0.148997	0.008066
TCONS_00108080	0.59406	0.369499	0	0.089456	0.154614	0.182579	0.667051	0.045682	0.324766	0.224911
TCONS_00108083	0.513962	0.008068	0	0	0.259314	0.048708	0.13206	0.063425	0	0.126973
TCONS_00108084	0.168768	0.306793	0.370456	0.065348	0.055416	0.14474	0.087604	0.182575	0	0
TCONS_00112532	0.236388	0.080594	0	0	0	0.594823	0	0.123416	0	0
TCONS_00108091	0.676626	0	0.247821	0.226549	0	0.158098	0	0	0.054609	0
TCONS_00112542	0.182557	0.588848	0	0.366334	0	0.526917	0.188256	0.44111	0	0.536194
TCONS_00108114	0.135218	0	0.88153	0	0.01282	0	0.041692	0	0.120719	0
TCONS_00108115	0	0	0	0	0	0	0.621097	0	0.021701	0
TCONS_00108117	0.568356	0.731787	0.70655	0.642452	0.274543	0.292415	0.13118	0.115318	0.057357	0.130452
TCONS_00112565	0.893306	0.820069	0.443052	0.341409	0.578672	0.406527	0.339566	0.921816	0.866712	1.00763
TCONS_00108131	0.504223	0.185759	0	0.213414	0	0	0.217759	0.846491	0.472781	0.365125
TCONS_00112586	0.269314	0	0	0.136268	0.092598	0.310559	0.015614	0.555713	0.113026	0
TCONS_00108145	0	0.042655	0.498446	0	0.094406	0.059465	0.103549	0.607305	0.175867	0.709909
TCONS_00108164	0	0	0	0	0	0	0.823829	0	0	0
TCONS_00108170	0.618588	0	0	0	0	0	0.423849	0	0	0
TCONS_00112613	0.72273	0.201671	0.189244	0.064897	0.176036	0.234455	0.095967	0	0	0
TCONS_00112612	0.0256	0.448983	0.016167	0	0.217739	0.123358	0	0.065714	0	0
TCONS_00112614	0	0.424694	0	0	0	0	0.041547	0	0	0
TCONS_00112591	0	0	0.070933	0	0	0.648314	0	0	0.305219	0
TCONS_00112592	0.128141	0.134581	0.137897	0.156525	0	0.254872	0.127626	0.336772	0.484105	0.316769
TCONS_00112593	0.694308	0.531732	0.382689	0.630082	0.517204	0.601624	0.540476	0.39448	0.858128	0.796178
TCONS_00112594	0.659326	0.628603	0.66919	0.598224	0.893274	0.687547	0.891051	0.289074	1.2211	0.581055
TCONS_00108176	0.439936	1.04085	0.838981	1.15087	0.392034	0.752845	0.610641	1.18199	0.73352	0.714792
TCONS_00112617	0.488776	0.399437	1.15682	0	0.659375	0.572319	0.142149	0.338605	0.313731	0.282745
TCONS_00108181	0	0.474897	0.109929	0	0	0	0	0	0.218951	0
TCONS_00108182	0.097092	0	0.31934	0.159788	0	0.112927	0.09979	0.777275	0	0.394298
TCONS_00112626	0	0.426548	0	0.137591	0	0	0.341557	0.209183	0.059741	0
TCONS_00112625	0.034845	0.295558	0	0.094287	0	0	0.474001	0	0	0.312153
TCONS_00108190	0	0.155921	0.344499	0	0	0	0	0.426577	0	0.233074
TCONS_00112632	0.293662	0.733029	1.16562	0.823234	0.850031	0.341896	0.181395	0.886967	0.743892	0.716145
TCONS_00112635	0	0	0	0	0	0	0	0	0	0.464085
TCONS_00108201	0.120873	0.217912	0.125567	0.260146	0.368641	0.280703	0.142866	0.073285	0.035971	0.122309
TCONS_00112639	0.20481	0.458575	0.352602	0.20481	0.270474	0.38098	0.272387	0.403776	0.45688	0.083175
TCONS_00108208	0.384782	0.127304	0.279444	0.108287	0.660026	0.200333	0	0.427618	0.784368	0.378196
TCONS_00108209	0.255133	0.188467	0.280963	0.111621	0.108762	0.132253	0.350995	0.204444	0.177273	0.176926
TCONS_00112648	0.504754	0	0	0	0	0	0.035738	0	0	0.056371
TCONS_00112647	0.181027	0	0	0.139592	0.061299	0	0	0	0.064647	0.493376
TCONS_00112654	0.571806	0	0	0	0	0	0	0	0	0
TCONS_00112652	0.243534	0	0.064893	0.068134	0	0.107625	0.332156	0	0.618561	0.159382
TCONS_00112653	0.084257	0.207829	0	0.071435	0.146996	0.01193	0.143451	0.097647	0.130495	0.223156
TCONS_00108220	0.405888	0.215797	0.461862	0	0	0.141408	0.337416	0.233645	0.40263	0.499884
TCONS_00108219	0.155145	0.055531	0.264886	0.233634	0.073353	0.386566	0.266014	0.172815	0.038463	0.199726
TCONS_00108224	0	0.145403	0.606021	0.123572	0	0.143246	0	0.537882	0.423269	0.361321
TCONS_00112666	11.9221	15.0725	26.9662	8.61576	13.7507	12.0873	4.97155	12.2845	16.9224	9.88781
TCONS_00112669	0	0	0	0.097771	0.437449	0	0	0.010001	0	0.063864
TCONS_00112679	0	0.414084	0	0	0	0	0.054103	0	0.588754	0
TCONS_00112680	0	0.105894	0.172895	0.107283	0	0	0.164589	0	0.630748	0.270975
TCONS_00112682	0.61147	0	0.226263	0.270334	0	0.285725	0.165384	0.231066	0.127378	0.162825
TCONS_00108244	0	0	0	0	0.387724	0.073987	0.129887	0	0.454332	0.035736
TCONS_00108243	0.589199	0	0	0.178069	0.115053	0	0	0.061693	0.400946	0.199398
TCONS_00108249	0	0.1239	0.503385	0	0.069653	0.078862	0	0	0	0.094364
TCONS_00112699	0	0.48186	0	0	0	0	0	0	0	0.631827
TCONS_00108264	0.584241	0	0	0	0	0	0	0	0	0
TCONS_00112724	0.329001	0.233311	0	0.14147	0	0	0	0.09867	0.146862	0.125259
TCONS_00112725	0.111219	0.405116	0.101928	0.29509	0.119806	0	0.076717	0.066544	0.398728	0
TCONS_00112726	0.253202	0.150213	0.18589	0.504996	0	0.486245	0.173491	0	0.903707	0.085689
TCONS_00108277	0	0.187409	0	0.317418	0.116605	0	0.175589	0.65883	0	0
TCONS_00108269	0	0	0	0	0.476433	0	0	0.142201	0	0
TCONS_00112710	0	0	0	0.257549	0.335752	0	0.394921	0.181236	0.196743	0.003959
TCONS_00108271	0	0	0.120085	0	0.499734	0	0	0	0	0
TCONS_00108272	0	0	0	0	0	0	0.352725	0.519609	0	0
TCONS_00112712	1.5008	2.0993	1.17616	0.490598	0.248622	0.655339	0.297506	1.16448	0.220747	1.74371
TCONS_00112706	0.466687	0.052699	0.419977	0.839588	0.845625	0.162166	0.375558	0	0.494854	0.303665
TCONS_00112732	1.00661	6.27808	0.445656	0.965769	0.352642	0.147899	0.197471	0	0.260167	0.070676
TCONS_00108289	0.541128	0	0	0	0	0	0.024606	0	0.243603	0.259711
TCONS_00108286	0	0	0	0	0	0	0.459391	0	0	0
TCONS_00108288	0	0	0	0	0	0	0	0	0	0.612199
TCONS_00108287	0.193781	0	0	0	0	0	0	0	0	0.994995
TCONS_00108290	0.463275	0	0	0	0	0	0	0	0	0
TCONS_00108291	0.117592	0	1.07067	0.091703	0	0	0.036867	0	0	0.362595
TCONS_00108293	0.461189	0	0	0	0	0	0.156947	0	0	0.156076
TCONS_00108297	0.049193	0	0	0	0	0	0.045841	0.417955	0	0.091898
TCONS_00112776	0	0	0.032412	0	0	0	0	0.643856	0	0.064618
TCONS_00108302	0	0	0.115549	0.063848	0.129721	0	0.32811	0.057302	0	0.314391
TCONS_00112796	0.056267	0	0.376325	0.337602	0	0	0	0	0.200935	0.0636
TCONS_00112797	0.270435	0.565231	0.93074	0.135218	0.155414	0.258222	0.672238	0.086567	0.310306	0.156894
TCONS_00108316	0.221018	0.354753	0.611473	1.06982	0.295437	0.087505	0.896972	0.534198	0.719028	0.481592
TCONS_00112798	1.29295	2.05174	3.60956	0.840904	0.568216	0.845848	4.09436	0.374028	1.36062	1.64623
TCONS_00112800	0	0	0	0	0	0	0	0.417637	0	0
TCONS_00112801	0.618354	0.565055	0.498762	0.40825	0.292861	0.034521	0.211844	0.535105	0.183894	0.418529
TCONS_00108332	0.91703	0	0	0	0	0	0	0	0	0
TCONS_00112805	0.052486	0.047616	0.058581	0	0	0	0.18031	0	0.427902	0
TCONS_00108329	0.229295	0.124617	0.513115	0.087087	0.202856	0.657803	0	0.393681	0.119645	0.036155
TCONS_00108330	0.094334	0.078311	0.138533	0.033681	0.097877	0.557744	0.077083	0.198216	0.074434	0.07465
TCONS_00112808	0.088463	0.572604	1.55413	0.534936	0.26417	0	0.183063	0	0.149475	0
TCONS_00112809	0.039691	0	0.600778	0.357767	0.132084	0	0	0	0.028837	0.029458
TCONS_00108335	0	0.465808	0.136082	0	0.333913	0.197382	0.327673	0.029574	0.106277	0.125458
TCONS_00112818	0	0	0	0	0	0.045239	0.793658	0	0	0
TCONS_00112819	0	0	0	0	0	0	0.727235	0	0	0
TCONS_00112825	0	0.508748	0	0	0	0	0	0	0	0
TCONS_00108354	0.450007	6.73665	0.25169	2.65863	1.079	8.30012	0.990117	2.02565	4.03464	0.183369
TCONS_00112830	0.11847	0	0.522292	0	0.033211	0	0	0.217253	0	0
TCONS_00112836	0.088161	0.278219	0.057671	0.274278	0.136634	0.160819	0.122556	0.156216	0.41002	0.545072
TCONS_00108360	0	0	0	0	0.452789	0	0	0	0	0
TCONS_00112842	0.367818	0	0.110635	0.191014	0.805712	0.115311	0.323013	0.48938	0.48711	0.603599
TCONS_00108363	0	0	0	0.143691	0	0	0.114695	0	0.592054	0
TCONS_00108364	0	0	0	0.974587	0.12128	0.058566	0.360599	0	0	0.247366
TCONS_00108362	0.219857	0.217066	0.674811	0.674515	0.366824	0.517587	0.691581	0.039622	0.149862	0.672329
TCONS_00112850	0	0.230226	0	0.937077	0.082633	0.658483	0.280908	1.91003	0.0397	0
TCONS_00108374	0	0	0	0.439601	0	0	0	0	0.097789	0
TCONS_00112860	0	0	0	0	0.145345	0	1.10995	0	0	0
TCONS_00108377	0	0.072355	0	0	0	0	0	0.429237	0.147548	0
TCONS_00108379	0	0	0	0	0	0.377344	0.640568	0	0	0
TCONS_00108378	0.046333	0.566823	0	0	0.108663	0	0	0	0	0.113246
TCONS_00112864	0	0	0	0.457107	0	0	0	0	0	0
TCONS_00112873	0.108904	0	0.230478	0.730079	0.005562	0	0	0	0.016295	0
TCONS_00112872	0.0259	0.333947	0.485527	0.353184	0.153081	0.102696	0.090749	0.386182	0.22072	0.803806
TCONS_00108392	0.128918	0.303522	0.44957	0.042973	0.436539	0.5248	0.353185	0.346847	0.421247	0.087257
TCONS_00108393	0	0.229945	0.429157	0	0.284002	0.518755	0.408725	0.067088	0	0.069632
TCONS_00108394	0	0.43221	0	0.152369	0	0.394606	0.413952	0.061081	0	0
TCONS_00108395	0.425129	0	0.117042	0.15836	0	0	0.327705	0	0.012652	0.030213
TCONS_00108400	0.089007	0	0.387251	0.510208	0	0.074106	0.391913	0.016588	0.291799	0.170361
TCONS_00108401	0.355411	0	0.23962	0.355411	0.120349	0.137791	0	0.21265	0	0.46989
TCONS_00112884	0.114456	0	0	0.074002	0.451049	0	0	0	0.07928	0.08565
TCONS_00112883	0	0.496676	0	0	0	0.101826	0	0	0.071908	0
TCONS_00108402	0	0.193599	0	0	0	0	0.716212	0.181672	0	0
TCONS_00112895	0	0.036018	0	0.182843	0.367614	0.176825	0.0261	2.40791	0	1.27391
TCONS_00112896	0	0.209187	0	0.418597	0.168085	0.189843	0.024157	0.352077	0	0.085225
TCONS_00112897	0	0.28614	0	0.188589	0.25885	0.100798	0	0.901054	0	0.310437
TCONS_00112898	0	0.272799	0	0.11833	0.101297	0.118685	0	1.1127	0	0.341174
TCONS_00112899	0	0.439949	0	0.465981	0.209823	0.540064	0	1.74605	0	0.295328
TCONS_00112904	0	0.259363	0	0.145263	0.329963	0	0.170519	0.8441	0.399902	0
TCONS_00112905	0	0.00305	0	0	0.022119	0	0	2.3e-05	0.153224	0
TCONS_00112900	0.79129	1.0648	0.690384	0.689598	0.73929	1.34949	0.768364	1.43709	0.491852	0.746315
TCONS_00112902	0.572851	0.541396	0.264625	1.19666	1.25132	0	0.496703	0.517251	0.520526	0.575606
TCONS_00112901	0.52431	0.651197	0	0.477287	2.89117	0.76443	0.210027	1.02679	0.142037	0.638202
TCONS_00112903	0.180195	0.664365	0.137559	1.19258	0.650327	0.218908	0.122745	0.396161	0.26109	0.642667
TCONS_00112894	0.089682	0.347841	0.188529	0.317564	0.148853	0.139458	0.149762	0.409144	0	0.74566
TCONS_00112893	0	0.728879	0.299259	0.621579	0	0.691425	0.497824	1.01778	0.72131	0.438582
TCONS_00112907	1.07859	2.10445	0.470733	1.31238	1.80511	1.037	0.965845	0.67106	0.327896	0.932595
TCONS_00108405	0.126051	0	0	0	0	0	0.747721	0	0	0
TCONS_00112924	0.084217	0.307195	0.308526	0.700498	0.092206	0	0.047895	0.247241	0.334833	0.057002
TCONS_00112927	0	0	0.307296	0	0	0.123042	0.023299	0.581287	0.14456	0
TCONS_00112928	0	0	0	0	0.099959	0	0.11924	0.54114	0	0
TCONS_00108420	0.107063	0.44163	0	0.372215	0.285257	0	0.085263	0	0.292619	0.095349
TCONS_00108421	0.397332	0	0.43464	0.264446	0	0	0.219613	0.229807	0.235303	0.538759
[truncated: 52,314 more rows]

## Sheet: Table S10
Table S10. FPKM values of mRNAs
mRNA	SS1	SS2	SS3	SS4	SS5	SS6	SS7	SS8	SS9	SS10
SS.CHR1.3	9.77606	15.3828	13.5969	11.237	12.7048	15.5662	12.9407	18.4778	13.8143	15.6886
SS.CHR1.4	17.2408	19.5364	17.9748	23.4771	15.2601	19.2122	19.0741	14.3762	26.08	23.11
SS.CHR1.5	7.06083	5.45909	5.73483	7.94394	6.32672	8.82672	5.44762	7.12448	6.9857	7.33334
SS.CHR1.6	5.84816	8.34069	6.84783	6.18676	4.33427	9.92249	5.45237	5.8952	5.25625	3.3454
SS.CHR1.8	1.5747	0.666254	1.78771	3.24161	3.22743	1.48254	1.54604	1.72585	1.52858	2.07516
SS.CHR1.7	15.558	9.51009	12.0108	8.29803	13.2394	12.5409	12.1896	16.5009	9.43127	10.4361
SS.CHR1.9	66.8456	38.1599	60.0706	74.3471	35.7902	75.2643	78.5128	45.2671	61.3538	72.0211
SS.CHR1.11	0.608434	1.13133	0.948371	0.568596	0.464709	0.393621	0.587473	0.999994	0.404378	1.12997
SS.CHR1.12	0	0.094285	0	0.354326	0.329554	0.106958	0.141887	0.118728	0.606553	0
SS.CHR1.10	38.0684	39.1369	31.2629	36.0165	42.6206	60.4823	48.0376	28.9845	30.1099	27.1932
SS.CHR1.13	6.50745	6.41295	5.33882	7.05291	6.74036	6.01168	7.4564	3.94673	6.95721	8.77526
SS.CHR1.15	1.93149	2.73449	2.09198	1.53598	3.43569	1.97146	3.03893	3.1243	1.16325	4.40874
SS.CHR1.14	24.372	23.262	21.4086	20.528	24.9397	25.2492	22.6868	25.3799	22.6806	21.3814
SS.CHR1.21	0.340161	0.129206	0	0	0.058271	0	0.070222	0.188832	0.310977	0.13596
SS.CHR1.18	14.2434	11.0473	11.365	8.3091	9.84206	15.6895	12.9631	14.1003	13.4941	9.28733
SS.CHR1.16	5.05318	4.6631	5.06057	3.00924	5.98432	6.49208	5.54314	5.44813	5.14336	3.96594
SS.CHR1.17	11.8078	9.97319	12.472	8.59913	10.6457	14.1028	11.4198	11.8568	11.8559	10.1427
SS.CHR1.19	0.660105	1.02987	0.634025	0.702606	1.01842	0.463585	0.66323	0.703983	0.288784	0.468234
SS.CHR1.22	12.7433	13.7665	14.7968	12.1576	14.0244	11.3775	10.8115	15.3401	14.3201	12.2207
SS.CHR1.25	1.46323	0.127236	0.295316	0.651397	1.08034	0.222392	1.74296	0.68548	0.160003	0.387493
SS.CHR1.27	0.32473	0.069146	0	0	0	0.090439	0.167447	0.022763	0	0.074245
SS.CHR1.26	0.086788	0.215402	0.485562	0.467007	0.426004	0.570109	0.523925	0.221427	0.194015	0.023822
SS.CHR1.24	5.43893	4.55331	5.94659	4.437	4.06868	5.53606	4.47801	4.38782	3.15865	4.44898
SS.CHR1.29	8.09092	11.3588	10.349	8.29439	8.19356	7.43016	8.00649	8.59406	6.55575	7.35604
SS.CHR1.32	0.045492	0	0	0	0	0	0	0	0	0
SS.CHR1.30	9.06866	10.2691	9.57211	7.07289	6.26892	10.2588	9.69945	11.684	7.01233	7.05876
SS.CHR1.31	7.03299	11.6801	8.72497	13.83	8.01544	6.63659	9.67319	8.53115	8.73669	11.1178
SS.CHR1.36	0.135317	0	0.206454	0.334652	0.275721	0.461419	0.177859	0.470884	0.318938	0.17783
SS.CHR1.35	2.51021	3.61113	4.86943	1.15111	2.12442	3.95871	1.92043	4.72629	3.17121	3.25366
SS.CHR1.34	0.153453	0.22745	0.306101	0.637734	0.207372	0.449353	0.051274	1.04933	0.133974	0.243973
SS.CHR1.33	21.9221	15.6161	14.7252	14.9512	19.2491	19.9996	10.2711	21.5994	12.496	15.3884
SS.CHR1.37	19.2973	20.4084	17.9283	19.6336	18.635	17.2495	17.4236	20.3658	22.3047	19.6626
XLOC_000045	9.52059	8.45404	7.60084	6.95858	7.82226	8.45756	8.68797	11.8921	10.8322	7.42554
SS.CHR1.38	2.5377	2.14525	2.20903	1.00332	4.87005	0.922699	0.495132	0.877986	3.01943	1.29418
SS.CHR1.40	7.80084	11.1828	7.03496	2.28847	8.81091	3.95925	7.65697	5.7006	9.09346	9.43795
SS.CHR1.41	0	0	0	0	0	0	0	0.111261	0.140086	0.087403
SS.CHR1.43	15.4172	18.8419	10.8797	12.1329	21.7455	12.9493	14.6289	12.1057	12.5627	18.4645
SS.CHR1.39	99.9552	105.892	101.491	83.4908	89.097	95.8926	61.1755	87.9198	80.9216	104.339
SS.CHR1.44_SS.CHR1.45	5.87283	5.19194	4.89172	6.97099	5.85498	7.01612	4.7234	7.89914	4.81697	7.10614
SS.CHR1.46	85.497	134.774	102.302	78.2721	78.2647	107.182	62.6062	77.2855	61.7452	111.009
SS.CHR1.48	10.257	9.2829	5.04771	5.83291	5.19648	11.0434	6.13268	2.56813	15.5776	12.4916
SS.CHR1.51	1.45379	2.14882	2.1791	1.72095	1.85783	2.38111	1.47574	1.84695	1.25683	1.26108
SS.CHR1.52	0.482798	0.065811	0	0.159975	0.201164	0.477955	0.102402	0.278958	0.093946	0.077798
SS.CHR1.49	19.7685	16.2052	14.7098	19.6468	17.4551	15.9967	15.6538	22.2215	16.5342	16.1629
SS.CHR1.50	29.5118	22.8193	19.6932	26.4198	24.3887	15.3726	22.1489	27.7155	26.1161	24.2501
SS.CHR1.53	48.178	70.9416	66.3026	74.8213	47.3522	46.0755	76.5589	98.5364	47.8308	72.6427
SS.CHR1.55	1.20718	1.37316	2.55401	2.02073	1.13201	1.03313	2.22818	0.839192	1.53008	1.3517
SS.CHR1.54	28.8504	19.553	29.1625	15.8754	26.9299	20.7842	17.363	26.3234	109.141	19.3716
SS.CHR1.56	3.41987	2.36422	3.54151	2.69995	3.53828	2.79751	4.52046	2.7349	1.07969	2.29402
SS.CHR1.57	8.2994	13.6781	14.3812	14.5145	13.5445	13.1982	13.0006	16.8524	11.3363	10.1424
SS.CHR1.58	12.5856	17.3716	12.0376	14.4323	19.816	22.7456	13.7692	24.1998	16.3463	15.3324
SS.CHR1.59	11.6292	9.90222	8.80806	9.98388	13.1823	15.7978	13.0852	11.6589	13.9669	12.0376
SS.CHR1.60	0	0.017238	0	0.020826	0	0	0	0	0	0
SS.CHR1.62	14.2349	10.6546	12.509	9.97765	11.8175	13.3021	13.0601	10.1264	13.4072	11.4139
SS.CHR1.63	5.29293	6.1018	3.424	4.03534	4.13886	4.75879	4.91361	5.10782	4.27111	4.17307
SS.CHR1.65	4.71599	5.39178	4.95176	5.6298	3.10724	2.49439	3.01078	4.52928	6.68437	7.28688
SS.CHR1.64	5.24657	0	0.788846	2.74594	1.51715	0.022992	0.858459	0.713888	0.413972	0.754372
XLOC_002246	4.47505	1.88184	2.88562	2.75929	3.33228	2.05738	2.54016	3.00401	2.9809	2.81035
SS.CHR1.69	0.100736	0	0.036098	0.017195	0.054861	0	0.039183	0.01538	0	0.029683
XLOC_002249	0.398436	0.169725	0.62584	0.629309	0.829992	0.14004	0.38259	1.115	0.48094	0.833271
SS.CHR1.67	5.22908	14.6181	15.1906	4.15526	5.5737	5.43883	5.16129	3.04639	4.49913	8.20982
SS.CHR1.68	25.0455	32.299	38.9718	28.0383	30.9886	31.6074	20.7243	25.2959	31.4729	24.4422
SS.CHR1.72	8.78214	12.0471	11.7782	11.9258	13.3176	9.21439	15.3407	11.1614	8.33571	11.623
SS.CHR1.70	11.0225	9.52543	11.016	8.87325	9.30057	7.84769	9.23223	9.86244	8.27226	9.87707
SS.CHR1.71	15.2826	22.2709	15.8501	31.3645	15.3087	16.0349	15.2556	19.9969	18.8272	16.2645
SS.CHR1.73	5.94259	7.26839	5.65899	5.92391	4.8286	4.86464	5.60839	4.73492	5.44333	5.08946
SS.CHR1.74	27.3721	28.2916	21.6304	25.6603	24.0964	23.8184	22.7883	29.4392	22.88	34.0172
SS.CHR1.76	4.73405	2.10905	3.396	2.56576	9.32755	2.38344	4.271	4.50905	3.74305	4.94137
SS.CHR1.77	5.98099	6.02207	8.20473	4.9955	2.2874	7.70345	4.55654	2.21254	11.5683	1.78708
XLOC_000095	85.6267	11.3246	31.467	31.5905	31.7503	36.0703	59.1611	19.0995	10.6443	29.2428
SS.CHR1.78	5.40073	1.25538	4.70001	3.68941	3.20242	0.938183	1.09527	2.06326	4.2664	3.1026
SS.CHR1.80	0.543293	1.69042	0.157333	1.07688	2.6067	0.290261	5.31952	0.060785	1.82962	0
SS.CHR1.79	4.75141	5.89001	4.93883	7.20773	8.95735	4.86193	3.96456	3.34589	5.9849	4.68697
SS.CHR1.82	5.01346	18.5393	5.04287	9.99319	9.89098	6.94955	14.8706	17.9893	1.29718	7.06803
SS.CHR1.84	0	0	0	0	0	0	0	0	0	0
SS.CHR1.83	1.13816	1.06313	1.78357	0.948185	1.61732	1.12847	2.01869	2.00561	1.10793	1.91803
SS.CHR1.85	9.32457	37.3972	31.7906	8.68857	39.6847	60.5134	29.9089	13.6738	86.3154	9.38786
SS.CHR1.86	31.9322	34.8433	23.5074	40.1237	29.0465	18.928	32.3322	48.104	30.9079	29.6491
SS.CHR1.87	30.1366	40.5543	34.0615	11.2579	55.7795	34.1193	41.3804	22.0196	29.2737	23.9464
SS.CHR1.88	2.62746	2.77499	3.32672	3.54996	2.81968	2.92914	3.3358	5.60269	4.52174	4.6351
SS.CHR1.89	28.942	26.7494	34.0363	21.4876	28.2889	31.4758	28.2017	31.6353	28.4209	29.8937
SS.CHR1.90	5.10783	4.02696	3.50955	3.94441	4.51783	4.91042	6.34224	7.31869	5.01957	4.10942
SS.CHR1.93	1.10901	0.162844	0.176092	0.294979	0.221656	0.24836	0.090196	0.392762	0.437239	0.208921
SS.CHR1.94	2.79678	3.89339	5.8824	10.4863	2.3105	5.49446	2.30553	1.61673	4.01089	6.31147
SS.CHR1.97	0.027815	0	0	0.064158	0	0	0	0	0	0.028146
SS.CHR1.95	1.69023	1.26186	0.925248	2.44997	0.929435	3.08235	1.09402	1.13251	1.85143	1.98699
SS.CHR1.99	5.4636	5.48935	6.26476	5.879	6.1452	6.19613	6.56442	5.91316	4.13979	4.70315
SS.CHR1.101	0.168878	0.904729	0.582201	1.06362	0.744941	1.25455	0.83183	0.649628	0.198143	0.583585
SS.CHR1.102	0.39193	0.28837	1.38464	1.34192	0.27847	2.01487	0.499836	0.736707	0.228706	0.336577
SS.CHR1.103	0.636586	1.09904	0.524915	1.39796	0.562156	1.78545	0.326497	1.0833	0.576188	0.828639
SS.CHR1.104	3.24601	0.671642	0.47064	0.281623	0	0.460436	0	0.277188	1.94563	3.1774
SS.CHR1.105	6.93091	4.3122	8.22407	0.475677	0.446157	7.88152	0.575635	2.08645	4.96842	8.14935
SS.CHR1.100	225.386	280.802	232.006	366.27	360.17	279.92	277.94	253.658	362.004	289.078
SS.CHR1.106	23.2433	25.786	19.2007	14.0468	21.929	24.5585	15.5902	11.6933	26.6039	28.8193
SS.CHR1.107	39.5637	72.3195	52.5765	76.856	66.7381	78.3297	47.8381	88.0922	80.3949	89.8476
SS.CHR1.109	0.05202	0.427078	0.468734	0.51799	0.587601	0.214901	0.555759	0.116952	0.889283	0.28622
SS.CHR1.108	17.6788	14.9581	14.5904	11.1849	14.9351	11.7298	14.073	19.0899	18.1775	16.2426
SS.CHR1.112	2.57851	1.7515	0.993934	0.681397	1.65221	0.774242	3.15461	3.30157	1.63311	1.32483
SS.CHR1.113	8.67435	8.17879	7.17074	8.22072	5.45408	9.18422	6.29576	7.81102	7.87488	9.23236
SS.CHR1.114	18.9942	18.0211	16.0133	17.115	14.1705	17.439	17.0072	19.3722	18.2465	18.2118
SS.CHR1.115	0	0	0	0	0	0	0.047064	0.041097	0	0
SS.CHR1.116	11.0021	9.81675	8.05265	6.73782	6.82311	8.53427	8.12961	8.77965	9.56026	6.134
SS.CHR1.118	0.678951	2.67324	4.66187	0.994503	0.292395	2.17335	3.72911	0.310746	0.460444	0.851338
SS.CHR1.117	12.1473	23.6501	39.7711	21.3814	23.7531	31.9403	25.844	6.21536	25.2113	32.2453
SS.CHR1.121	1.237	2.12572	2.41788	1.68444	2.14732	1.21779	2.05202	1.77801	1.62536	1.44755
XLOC_000140	6.94782	1.63508	1.97065	6.18248	12.9294	7.74441	11.9144	10.8728	6.55453	14.1678
SS.CHR1.122	6.39462	4.01484	4.51892	3.83449	4.08206	5.29128	4.29858	4.89362	4.83512	6.183
SS.CHR1.124	1.19929	1.5681	1.33288	0.153213	0.095335	2.79337	1.30449	0.486082	3.17956	1.66459
SS.CHR1.123	7.44354	8.94407	10.0299	7.1572	9.84651	9.36253	8.13545	9.52811	9.045	7.38337
SS.CHR1.125	17.6249	8.85223	15.183	17.1351	17.8115	26.063	23.1306	30.8234	13.1957	24.8906
SS.CHR1.126	31.1425	40.3239	25.8689	17.465	1.84696	43.0808	9.40556	3.61796	71.331	9.17952
SS.CHR1.127	0.791667	3.49748	0.934726	0.484208	3.49706	2.20259	1.35636	2.61273	0.918012	0.553293
SS.CHR1.128	0.438833	1.38932	0.661435	0	1.55532	0.811967	0.352557	0.228605	0	0
SS.CHR1.129	0	0	0	0	0	0	0	0	0	0
XLOC_000152	27.4824	27.5351	22.4751	20.9424	28.627	28.0268	22.0512	28.035	28.9092	27.1369
XLOC_002325	36.4773	36.6924	39.4422	23.0478	41.1207	51.4877	43.8757	53.8393	61.5489	52.9758
SS.CHR1.136	5.9487	5.3846	10.8833	1.41549	6.82867	5.02044	3.03071	8.86064	7.34182	5.40559
SS.CHR1.132	1.17048	0	0.58532	0	3.26876	2.08609	0	0	0	0
SS.CHR1.135	5.41965	7.94828	9.1716	0	2.69117	14.4171	0	7.2923	2.12855	3.35746
SS.CHR1.134	0	0.044939	0	0.004564	0.087766	0.228418	0	0.047649	0.002597	0.033231
XLOC_002331	0.586405	0.457687	1.57823	0.243229	0.651558	0.36398	0.157916	0.433015	0.86351	0.637262
SS.CHR1.145	7.84591	6.90557	7.27002	8.65758	8.62693	7.55495	5.51369	7.21663	8.24672	6.31874
SS.CHR1.146	8.11174	7.53023	6.82552	6.83881	7.45977	7.29105	8.16347	8.7893	5.91961	7.64979
SS.CHR1.147	14.1557	13.5583	9.48793	9.94694	13.9342	10.165	14.1618	11.8017	13.6827	12.2722
SS.CHR1.148	2.71333	1.40821	3.27585	3.20713	2.1805	2.59307	2.31818	2.01121	2.38338	2.07974
SS.CHR1.149	19.3148	17.2342	12.6904	18.851	13.5858	13.1954	9.94228	18.4164	16.9708	11.7352
SS.CHR1.150	6.65262	6.16121	5.47726	4.6984	5.48538	6.8166	4.89561	6.00119	6.06194	5.4933
SS.CHR1.137	0	0	0.035331	0	0	0.091546	0.032754	0	0.057285	0
SS.CHR1.138	1.21583	0	1.13513	0.036875	0	0.044501	0.063791	0.102317	4.76487	2.60308
SS.CHR1.144	463.036	6.15318	4.67058	0.263291	104.727	0.391334	84.3033	6.44536	18.1592	8.28707
XLOC_002343	0.74012	0	0.263051	0.133649	0.767854	0.217124	0.499178	0	3.77234	0.036808
SS.CHR1.139	33.7619	0.178218	0.395753	1.04817	0.603015	0.588163	4.49334	0.512402	0.579064	0
SS.CHR1.140	14.9817	0	0.310917	0.467933	1.27701	0	2.3119	0.691211	0.030991	0.016917
SS.CHR1.141	0.104484	0	0.252434	0	0.070262	0.12837	0.510463	0	0.230245	0.063498
SS.CHR1.143	0	0	0	0	0	0	0	0	0	0
SS.CHR1.154	4.81765	4.68715	1.77814	4.70646	4.3952	2.73933	4.19367	10.7448	1.15226	4.49201
SS.CHR1.151	15.37	16.3764	10.3793	20.1372	18.4537	19.5757	12.9996	13.0126	7.18349	10.0809
XLOC_000201	11.479	11.193	13.4336	12.8279	15.493	10.0849	14.0588	11.4459	11.564	9.80513
SS.CHR1.153	7.07983	5.34253	4.22587	5.60694	3.84047	4.16422	5.43072	4.61745	4.35905	3.01507
SS.CHR1.155	5.23993	3.78115	5.73596	6.10557	5.30877	5.67289	6.45744	6.45536	4.46511	5.04813
SS.CHR1.159	1.89635	1.36158	1.95686	3.89388	0.273754	9.28462	0.660863	2.34283	9.58214	0.910166
SS.CHR1.156	5.80406	4.53729	4.1013	3.23934	5.03751	3.2154	4.16922	3.94194	4.71492	7.07796
SS.CHR1.157	4.84191	0	2.67271	1.32275	0.495829	1.90373	1.98998	1.99385	0.753526	1.22952
SS.CHR1.158	0.798837	0	0.310746	0.325056	0.159556	0.788875	0.081608	0.454015	0.434378	0.3726
SS.CHR1.160	9.88289	9.60069	11.4816	10.0385	9.59188	13.6118	10.7393	10.5605	10.9297	11.9679
SS.CHR1.163	0.409212	0.468665	0.675021	0.375659	0.598191	0.353013	1.17197	3.13927	0.38983	0.58767
SS.CHR1.164	1.35438	1.53218	1.26738	0.858514	0.918927	1.74281	1.17443	1.10405	3.43919	1.14213
SS.CHR1.162	18.98	16.9319	17.5493	16.4193	29.3525	20.1054	17.8489	16.265	12.5933	19.4039
SS.CHR1.166	0.34989	0.085016	0.26967	0.345013	0.464505	0.058547	0.282123	0.106317	0.126479	0.209273
SS.CHR1.167	5.10204	8.70136	7.63295	4.99343	7.57127	8.75719	4.96617	5.76465	6.63755	8.3872
SS.CHR1.168	2.40011	3.51867	4.24221	4.34436	2.08861	2.2327	1.18068	4.21422	5.52231	3.41876
SS.CHR1.169	20.0026	18.3216	13.9372	13.4063	19.6139	17.3756	21.7249	16.2468	20.0278	10.1095
SS.CHR1.170	0.572106	0.77419	0.661929	1.24846	1.22446	1.7703	0.557095	0.6924	2.12564	0.942471
SS.CHR1.165	488.296	285.87	410.142	410.576	319.917	445.117	369.845	496.051	190.747	399.076
SS.CHR1.171	36.395	34.9466	37.5208	77.5856	44.6085	47.0707	24.4721	49.9911	100.102	66.5858
SS.CHR1.172	16.402	14.9663	21.0147	12.2065	16.7018	19.7736	11.1119	11.6665	28.2741	12.6915
SS.CHR1.174	0.571424	1.79384	0	0.139963	0	0.091706	1.63332	0.042196	0	0.981912
SS.CHR1.175	10.1919	11.5134	11.1392	16.0428	8.64876	15.7711	9.45991	11.5119	10.0564	10.457
SS.CHR1.177	45.1121	46.9667	36.6135	45.736	40.6151	44.1818	36.8053	45.3156	43.9837	40.7426
SS.CHR1.178	53.5693	69.2806	71.8373	58.3924	70.6835	50.5542	60.0337	70.0419	67.4761	79.7923
XLOC_002415	41.8309	49.2525	31.0409	15.2015	87.0897	30.875	56.9186	48.025	27.9878	45.8952
SS.CHR1.183	0	0.502309	0	0	0	0	0	0	0	0.173683
SS.CHR1.184	4.59921	15.7571	5.07353	14.3069	3.74679	6.68635	1.38784	3.01453	3.39731	11.0842
SS.CHR1.185	0.100044	0.062266	0.232484	0.07462	0	0.102696	0.090749	0	0.217514	0
SS.CHR1.182	8.28376	6.07158	7.29958	7.62166	5.6234	4.56092	7.31728	6.23379	6.8464	6.96
SS.CHR1.186	2.3106	3.19292	2.41175	3.42698	2.7001	2.84844	5.33833	3.5389	3.17152	2.38871
SS.CHR1.187	7.49375	7.84305	26.2275	4.9052	4.02321	4.7133	6.77431	9.35242	59.0482	6.45039
SS.CHR1.191	74.0186	101.011	101.106	79.5319	88.6184	105.023	73.1102	59.4492	72.2101	99.2122
SS.CHR1.195	0.368987	0.095567	0.286518	0	0	0.152376	0.076363	0	0	0.173742
SS.CHR1.192	7.97497	3.9719	4.65165	4.54777	5.3642	6.49695	5.33618	4.42382	5.57422	7.3092
SS.CHR1.193	0	0	0.027164	0.020883	0.034637	0.02869	0	0	0	0
SS.CHR1.198	3.89279	5.12216	3.56639	4.43326	3.0703	4.68279	3.28963	5.54896	4.80399	3.15503
SS.CHR1.196	17.1142	17.2939	21.1864	18.5375	15.9637	18.4977	18.3075	24.0812	13.9249	17.5599
SS.CHR1.197	81.5701	32.6977	42.7552	34.6972	36.2572	54.4759	35.2368	40.6121	41.9571	32.6973
SS.CHR1.199	8.37886	6.39136	5.4922	6.55579	4.86626	5.92952	5.07792	5.80262	7.47073	4.1395
SS.CHR1.200	1.29895	0.36974	0.518689	0.225903	0	0.558162	0.213026	0.763541	0.379763	0.206569
SS.CHR1.203	18.049	9.04126	29.4081	8.52508	4.98864	21.0137	20.5446	10.0182	14.4849	14.3529
SS.CHR1.204	5.7389	4.14149	3.18393	0.502014	2.85132	3.58342	2.5406	1.17167	2.2343	11.1142
SS.CHR1.206	0.03603	0.257891	0.212559	0.036994	0	0	0.077099	0.055166	0.016567	0
SS.CHR1.205	5.79311	7.74278	2.8577	4.56516	3.02718	5.27335	4.1421	5.90554	4.1136	7.08664
SS.CHR1.207	3.70863	4.68984	3.53516	5.0265	3.30883	2.98043	4.56776	2.40972	4.70568	5.91371
SS.CHR1.201	14.5048	19.3105	16.8671	16.1117	17.5419	18.9666	11.3031	20.4201	17.7082	11.5989
SS.CHR1.208	12.4469	19.2955	18.33	9.0247	18.926	12.283	9.07181	13.9277	17.5641	10.2169
SS.CHR1.209	17.0946	14.7518	13.0117	10.9857	14.185	13.151	13.1136	13.9898	14.1461	13.149
SS.CHR1.214	0.637343	0.145491	0.198555	0.335362	0.10929	0.368018	0.406968	0.58504	0.2997	0.548549
SS.CHR1.215	1.37696	0.478707	0.367178	0.357563	0.192721	0.91652	2.20124	0.564549	1.14087	0.470541
SS.CHR1.212	15.8161	15.6663	12.7453	16.9994	18.3901	11.2533	14.8856	12.1676	16.0945	17.8669
SS.CHR1.216	28.6309	32.4012	36.8516	28.2897	34.1864	30.5583	33.7167	30.3099	29.5642	30.0395
SS.CHR1.219	0.446949	0.28814	1.12143	0.446949	0	0	0.637371	0	0.681518	0.747177
SS.CHR1.223	0.036604	0	0	0	0	0	0.124919	0	0	0.036373
SS.CHR1.222	3.9876	18.3789	22.0575	4.63086	18.6158	17.4589	10.3147	23.4319	7.52441	5.80549
SS.CHR1.220	0	0	0	0	0	0	0	0	0	0
SS.CHR1.217	15.5466	20.9797	14.0891	27.8421	17.279	18.5242	21.5485	19.2352	20.0168	20.3728
SS.CHR1.224	17.7105	49.2213	59.4947	71.2356	66.5992	44.7182	43.0445	80.0962	45.2812	66.1073
SS.CHR1.226	31.2814	25.6456	19.9528	30.3534	29.0273	21.8704	26.7194	22.07	24.5084	34.4024
SS.CHR1.229	0	0	0	0	0	0	0	0	0	0
SS.CHR1.230	0.057392	0.054266	0.204434	0.279876	0.114042	0	0	0.100425	0	0.431341
SS.CHR1.235	0.190401	0.895448	0.062165	0.443246	0.099118	0.163349	0.175991	0.261152	0.042308	1.02365
SS.CHR1.227	23.6327	32.2865	33.7501	42.1769	31.8904	24.117	28.075	20.0609	29.1164	33.8365
SS.CHR1.236	31.3139	23.872	27.312	21.8792	26.0041	22.1164	34.2847	24.6455	19.8983	33.7988
SS.CHR1.237	41.5114	35.6599	45.2228	33.6068	46.5321	39.4395	42.5703	37.8704	44.7698	39.0789
SS.CHR1.238	0.365539	0.379387	0.132087	0.666313	0.442525	0.311598	1.09655	0.450901	0.629903	0.637767
SS.CHR1.244	0.1597	0.3604	0.313266	0.565814	0	0	1.0047	0	1.46587	0
SS.CHR1.245	0.464524	0	0.551022	0	0.114625	0.349767	0.211583	0	0	0.083476
SS.CHR1.246	0.954226	0.149621	0.803665	1.29809	0.141339	0.36032	0.467143	0.560217	0.459017	0.965891
SS.CHR1.247	0.51113	0	0.533134	0.588778	0	0.729563	0.120152	0.285319	0.452707	0
SS.CHR1.250	5.76596	6.23522	5.92143	7.17857	4.6925	6.32611	5.8251	7.02716	5.6748	5.9914
SS.CHR1.239	17.9115	18.7656	0.852716	34.272	28.1093	28.9789	35.8588	57.1865	2.47742	14.8359
SS.CHR1.240	1.45025	1.9145	1.89628	2.72122	1.34148	1.39605	4.19742	5.09937	0.909848	4.11472
SS.CHR1.241	18.2273	17.3309	32.5267	19.0188	1.64797	2.29027	1.01126	1.62632	29.7166	18.1719
SS.CHR1.242	13.539	11.1087	11.4412	14.3516	8.96089	9.91683	9.8037	6.74093	11.2324	11.8908
XLOC_002492	0.155066	0	0	0.893796	0.112674	0.275958	0	12.2517	0	0.604855
XLOC_002491	1.39271	0.234936	0	0.089057	0.022617	0	0.495944	0	0.355799	0
SS.CHR1.251	0	0	0	0	0	0.055117	0.170467	0.27173	0	0
SS.CHR1.278	0	0	0	0	0	0	0.029658	0	0	0
XLOC_002552	2.03305	5.68482	7.19061	4.01147	4.23715	5.99469	14.0002	11.9033	3.07936	3.04076
SS.CHR1.280	0.540015	0.42016	1.09509	0.620982	1.18244	0.481129	1.15084	0.18536	1.45492	0.390305
XLOC_002501	0	2.61569	0.269701	0	0.045235	0.008056	0.240931	0	0.039754	0
XLOC_002502	0	0	0.485059	0	0	0	0.61315	0	0	0
XLOC_000315	0	0	0	0	0	0.133833	0	0	0	0.834943
SS.CHR1.265	0.965302	0	0	0	0	0	0	0.235651	0	0
SS.CHR1.258	1.80807	1.67915	0.362078	3.2666	0.889951	0.123615	2.60338	4.77374	5.14656	2.02632
SS.CHR1.259	0	0.48355	2.4353	0.072162	1.0555	1.71626	1.82198	0.510389	0.02657	1.06532
SS.CHR1.277	1.26753	1.6352	7.85863	2.87656	9.89592	22.8972	15.717	38.0526	1.41964	11.1594
SS.CHR1.273	0.151328	0.062746	0.481427	0.167245	0.136646	0.231547	0	1.0071	0.468552	0
SS.CHR1.274	0.390268	0.546839	0.321826	0.334673	0.152811	0.400438	0.432904	0.217012	0.278162	0.282204
SS.CHR1.282	2.81221	1.97846	3.92065	5.0644	1.97585	3.69146	1.94425	2.78376	3.515	3.22347
SS.CHR1.281	25.3638	13.707	16.2681	13.2844	18.4926	16.5202	16.8982	16.7632	13.5621	16.1552
SS.CHR1.284	25.3005	28.307	31.4214	34.6158	24.1185	32.7748	25.0809	29.1881	32.4502	30.2422
XLOC_002561	1.07456	1.34077	1.61281	1.2758	0.637786	2.07284	0.945018	1.50657	0.966699	1.3756
SS.CHR1.287	31.9985	43.4987	48.9919	54.2509	25.8427	56.77	32.4281	33.4363	27.6894	49.493
SS.CHR1.288	4.90924	6.05831	3.81219	5.89026	5.0407	6.33267	4.51359	6.72011	8.93521	6.98547
SS.CHR1.289	0.709927	0.704742	1.63414	0.288667	0.106197	0.421749	0.924828	0.417729	0.382094	0.087268
SS.CHR1.290	9.3447	4.93218	2.66017	9.73137	5.82078	5.14254	2.80105	3.72818	8.9988	5.94794
SS.CHR1.291	4.99553	7.54556	4.87386	3.31745	6.86388	6.78606	5.4242	5.14544	3.05729	5.86599
SS.CHR1.293	4.23235	3.3164	2.87972	5.5562	4.05049	2.98487	3.89069	4.10395	3.38971	3.69916
XLOC_000352	26.4261	47.1416	39.5032	48.7728	32.485	40.1175	46.3773	34.8512	28.6431	33.9319
XLOC_002570	6.06809	0	8.83859	0.636362	0	0	0.016185	0	3.03654	0
SS.CHR1.296	0	0	0.169568	0	0.053325	0	0.052872	0	0	0
SS.CHR1.297	0	0	0	0	0	0	0.097231	0	0	0
SS.CHR1.299	3.53526	3.17263	3.45309	4.577	3.89272	3.32682	2.10972	3.63672	4.95619	3.00721
SS.CHR1.300	2.97313	1.26996	1.26997	2.11861	0.908697	1.54145	1.15546	1.60155	0.448285	1.58657
SS.CHR1.301	5.75717	7.42842	5.3266	8.18533	1.98127	21.4922	3.2903	6.31445	4.13773	3.7214
SS.CHR1.302	5.70778	3.67049	5.39073	3.54923	4.37195	8.27657	5.01715	6.13877	7.35144	4.39659
SS.CHR1.304	5.75326	5.97307	4.36545	3.33064	4.49003	5.87546	3.74518	5.64617	5.79586	7.23614
SS.CHR1.305	0.149203	0.853745	0.388922	0.351986	0.189982	0.245836	0.063524	0.228185	0.345006	0.346563
SS.CHR1.307	0.270262	0	0	0	0	1.32629	0.072525	0.126238	1.60876	4.117
SS.CHR1.306	5.9085	3.81592	5.01833	5.91933	4.55435	4.38405	5.37852	5.94517	4.50074	5.74572
SS.CHR1.308	2.87201	2.57087	2.17723	2.50192	3.00092	2.67605	1.93732	2.40312	5.90702	3.38518
SS.CHR1.309	22.4619	21.0962	17.8715	24.4182	20.13	14.2719	16.3456	37.5038	33.177	17.205
SS.CHR1.311	6.17598	4.25304	4.16287	4.4396	4.47997	4.52866	4.35135	4.81808	3.98376	5.00806
SS.CHR1.312	14.478	14.0766	12.1935	16.4178	12.7586	12.1832	12.2705	12.4747	14.6715	12.3878
SS.CHR1.313	5.98558	18.4524	18.5117	3.09536	9.04482	8.79361	12.0539	4.95618	3.69266	16.0866
SS.CHR1.316	1.84827	2.87604	1.67559	1.73394	2.4664	1.51879	2.15461	1.73886	1.59838	1.36844
SS.CHR1.315	7.31466	5.8318	7.1745	8.1834	5.97064	7.59499	4.64711	5.49237	4.42324	3.32938
SS.CHR1.314	0	0	0	0	0	0	0	0	0	0
SS.CHR1.322	0	0	0.463394	0.018877	0	0	0.10658	1.44029	0	0
SS.CHR1.317	7.99233	10.9498	11.799	11.2494	12.8585	8.47079	10.6201	11.0181	13.3106	11.1684
SS.CHR1.318	65.7098	97.8077	209.648	173.994	146.794	118.504	140.212	115.231	192.211	160.655
SS.CHR1.319	2.48089	2.37405	2.49226	2.41627	2.48852	2.44947	2.26554	2.33092	2.18952	1.96888
SS.CHR1.320	1.04974	1.18893	1.56311	1.27242	1.12601	1.98571	1.2148	0.950482	0.930833	0.827805
SS.CHR1.321	0.024574	0.043952	0.03958	0.130032	0.051645	0.021626	0	0.024826	0	0
SS.CHR1.326	7.76463	7.80793	8.48668	6.95471	8.98196	9.44768	8.39514	9.18634	9.22236	8.14108
SS.CHR1.328	0.283738	0.63824	0.639129	0.573529	0.576124	0.534206	0.703534	0.600937	1.42676	0.230946
SS.CHR1.327	4.23425	2.98705	4.08571	3.0682	3.07503	2.75725	2.38894	2.5664	6.94019	4.48038
SS.CHR1.329	3.08874	3.54616	3.54336	3.48426	2.99444	2.58721	2.28424	2.57749	3.52708	2.55016
SS.CHR1.330	50.8842	86.7564	75.5786	38.3544	84.89	69.9396	61.3623	56.2858	50.9205	76.0353
SS.CHR1.331	1.59154	1.89354	2.63926	0.873957	2.68197	1.26077	2.2271	1.48984	1.30784	0.891855
SS.CHR1.332	0	0.311478	0.048369	0.109221	0	0	0.045143	0.15492	0	0.044445
SS.CHR1.333	0.891978	0.861746	1.34836	1.87579	1.71526	2.84582	1.87524	1.35771	0.720421	0.386242
SS.CHR1.334	1.50266	2.02724	2.05477	2.14918	2.08107	0.905507	2.25872	1.7407	3.07331	1.88515
SS.CHR1.335	1.62651	3.68419	4.34818	4.72511	3.22225	3.79167	2.65177	3.14584	2.62055	3.86855
SS.CHR1.337	8.48678	5.08186	4.28263	5.51992	7.91567	6.19936	4.63089	6.6841	12.8516	6.51384
SS.CHR1.338	14.297	19.4852	12.9448	21.5195	12.8639	16.3317	13.5522	19.2519	13.9564	11.2513
SS.CHR1.341	1.37942	2.10025	1.72085	2.22455	1.61912	2.53901	1.90376	1.86359	1.97713	1.78507
SS.CHR1.339	0.369616	0.018173	0.01875	0.123105	0.034631	0.234697	0.108973	0.452611	0.016862	0.135881
SS.CHR1.340	14.0512	11.1812	15.0493	22.2899	24.1057	18.345	26.5982	25.5163	12.0137	29.3946
SS.CHR1.344	15.03	6.9764	9.49583	11.4249	0.47694	13.0141	17.356	17.5916	12.6715	0.179593
SS.CHR1.342	13.3807	14.2167	11.9902	15.3224	10.6392	14.1141	12.8326	9.73851	15.2315	11.3499
SS.CHR1.345_SS.CHR1.346	214.349	214.015	174.461	365.303	209.137	146.892	350.171	313.539	147.311	291.846
SS.CHR1.347	2.2667	0.661402	1.61307	1.59507	2.0368	1.46696	2.8514	1.82548	0.681961	2.51253
SS.CHR1.348	23.7407	23.9616	19.6225	23.9697	21.51	22.972	20.383	29.154	23.6473	22.6346
SS.CHR1.349	0	0	0	0	0	0	0	0	0	0
XLOC_002634	19.7121	13.1346	16.956	21.5912	26.4706	15.87	22.8524	10.5951	33.5274	25.2198
SS.CHR1.351	0.756211	0.627416	0.862642	0.806005	1.3786	0.537902	1.58266	0.984836	0.796354	0.981521
XLOC_000412	4.71471	3.19129	0.88948	6.56633	6.01774	6.63632	5.24872	3.03266	0.255262	2.42768
XLOC_002636	1.75238	0.435701	0.675595	1.88495	2.0575	2.31177	1.85898	0.801496	0.065511	0.978779
SS.CHR1.355	2.78695	1.81217	3.80021	1.49301	3.18127	1.96768	1.88597	2.71137	2.08156	2.50127
SS.CHR1.352	20.5452	18.8507	18.0451	19.3174	18.6434	18.7648	16.4966	21.7248	20.556	16.5099
SS.CHR1.359	1.10811	1.85392	0.679965	5.47303	1.01683	0.860244	2.79347	1.31845	6.81632	3.46667
SS.CHR1.356	0.354185	1.56733	1.3146	1.25332	1.269	1.37459	1.24624	1.88239	1.91388	0.955038
SS.CHR1.357	2.98135	3.07488	2.11012	3.4514	2.88965	2.43936	3.21946	3.11744	2.46269	2.10021
SS.CHR1.362	0.490989	0.528165	0.790022	0.500751	0.672185	0.371117	0.442367	0.982842	0.558629	0.647493
SS.CHR1.361	12.8088	11.311	10.7784	11.4862	10.7375	10.3182	12.9627	11.5013	10.8964	11.6028
SS.CHR1.363	2.56148	3.08219	1.84914	2.66488	2.65154	1.70756	1.81787	2.87327	2.49876	2.53084
SS.CHR1.364	0	0	0	0	0	0.264092	0	0.037628	0	0.164025
SS.CHR1.366	0.212394	0.036046	0.351537	0.31084	0.793251	0.184178	0.410755	0.058652	0.109583	0.062096
SS.CHR1.367	19.3672	26.9652	25.5652	18.057	22.0157	18.6016	25.0821	21.6164	28.8523	18.7161
SS.CHR1.365	27.4704	29.1561	28.3006	26.0361	22.2139	22.6179	18.4185	28.4191	26.4039	32.4287
SS.CHR1.368	0.625282	0.862073	0.49699	1.6904	0.780057	1.06235	0.63893	0.864498	0.608447	0.777639
SS.CHR1.369	1.7931	1.7377	1.45462	0.711589	1.25354	1.12253	1.10239	1.46263	1.29744	0.818637
XLOC_002666	0.246938	0.048096	0	0	0.061679	1.58254	0.04938	0.03163	0	0.063447
SS.CHR1.370	45.7517	45.13	44.8685	52.7678	47.0567	42.4507	41.8867	36.6561	51.9509	52.5336
SS.CHR1.372	12.7939	15.4526	12.0009	15.2251	13.9328	13.941	11.7544	16.5712	13.8082	13.8429
XLOC_002673	0.0785	0.083626	0	0	2.66719	0	0	0	0	0
SS.CHR1.373	5.17825	7.17478	2.94549	2.82388	6.97975	6.80974	3.61603	2.99989	3.985	4.16081
SS.CHR1.375	0.705483	0.840735	1.55332	1.05986	1.35225	1.84297	1.62609	0.791517	2.07636	0.767374
SS.CHR1.374	9.4702	9.95437	12.7459	10.611	6.2452	14.0043	7.84393	12.9638	10.8494	8.92097
SS.CHR1.376	12.9838	15.9504	16.4241	16.8635	13.5856	17.4195	15.2198	11.3895	9.05142	11.5353
XLOC_000445	1.54323	4.92326	2.20134	3.27485	4.9874	0.599673	3.91072	2.00145	10.6496	1.87002
XLOC_000447	0.195813	0.76718	1.31709	0.027933	2.40291	2.59148	0.057246	0.305781	1.18749	0.110024
SS.CHR1.380	1.54046	1.30325	1.18243	0	1.20631	1.32352	0	1.40713	1.28572	0
XLOC_000453	3.7048	3.16657	2.64211	3.6904	1.63058	1.15678	3.63337	4.6436	0.238491	2.12066
SS.CHR1.381	1.59905	2.11959	2.12081	2.83867	2.23075	1.93276	1.9931	1.79251	1.57734	1.62947
SS.CHR1.383	0.135359	0	0.526421	0.398904	0.16464	3.1817	0.09166	0.578085	0.876211	1.76381
XLOC_002690	7.36006	17.6453	17.061	24.5646	1.21463	17.9879	5.78178	7.10976	58.5698	10.7614
SS.CHR1.384	1.72743	2.04636	1.68094	3.42921	1.78823	2.20288	2.40505	3.68458	1.85974	3.84745
SS.CHR1.386	15.0349	9.26137	18.4993	11.952	16.7323	16.05	14.0405	9.72273	21.569	4.16701
SS.CHR1.387	14.9284	32.8192	21.7942	25.0636	36.0349	27.2367	27.1814	28.8578	22.0243	29.8724
SS.CHR1.389	0.414384	0.239303	0.048513	0.567956	0.115535	0.183722	0.512482	0.575729	0.256976	0.225768
SS.CHR1.388	1.83718	1.17943	2.62644	0.999286	2.13356	1.99963	1.74131	1.407	1.55331	1.75601
SS.CHR1.391	0.115555	0.064351	0	0	0	0	0	0.045138	0.117352	0
SS.CHR1.390	16.508	13.4486	12.6287	15.1684	12.6265	17.2878	12.1364	15.9089	15.7926	13.0835
SS.CHR1.393	2.81966	2.49684	1.85009	1.71923	2.50612	2.05309	2.99598	2.32059	3.11583	3.20503
SS.CHR1.394	0.448611	0.026587	0.152987	0.15356	0.582892	0.447405	0.196755	0.034224	0.264817	0.274527
SS.CHR1.396	0.949255	0.601452	1.11947	0.663858	1.49477	0.703649	1.19862	0.915971	0.502941	0.975489
SS.CHR1.395	7.19288	8.66994	6.58466	5.69539	7.85634	6.60923	8.62664	9.81237	12.3452	7.00583
SS.CHR1.392	19.6056	12.0135	12.0495	13.5394	16.1243	16.5852	13.1248	10.1618	20.2176	18.9523
SS.CHR1.397	11.2476	11.871	8.75211	10.5246	8.5077	11.2095	10.5228	11.2671	10.6513	10.9271
SS.CHR1.398	2.05891	0.497259	1.99571	1.12191	4.0704	3.81548	3.38002	4.15009	3.07866	5.07304
XLOC_000472	4.42246	0.018179	0.028041	0.050927	0.032551	0	0.056645	0.023006	0.056451	0.023076
XLOC_000473	35.4198	23.5033	32.1635	20.6448	31.5636	56.0786	31.5191	26.5763	43.9604	13.9653
SS.CHR1.399	2.37605	3.0989	1.2204	0.069922	3.13959	2.63238	2.21429	1.24168	3.76097	2.58051
SS.CHR1.400_SS.CHR1.402	9.40523	11.7684	12.3481	10.6721	8.35988	9.47756	11.3286	14.8353	13.7859	8.94916
SS.CHR1.405	1.17629	1.28458	1.56427	1.38054	1.12878	1.24464	1.28258	1.49733	0.51194	1.36855
SS.CHR1.403	47.0606	57.2979	37.8884	62.1276	46.6551	41.3523	46.2014	94.3226	39.5324	60.894
SS.CHR1.406	32.6506	36.7217	25.1807	28.5338	30.109	30.9194	29.7593	34.7389	31.9851	40.4804
SS.CHR1.407	24.766	31.1571	35.5735	21.7945	46.357	48.1743	32.1657	21.9583	25.3552	35.7674
XLOC_000483	2.18634	0.081891	0.112417	0.069287	0	0	0	0	0.092786	0.052407
SS.CHR1.410	0.03111	0.076074	0	0	0	0	0.157666	0	0	0
SS.CHR1.408	8.08602	2.14299	0.835268	0.506853	0	6.77758	1.82535	1.51233	17.0964	2.98883
SS.CHR1.409	3.7624	2.22718	4.20535	3.72899	3.1434	4.80843	3.35061	5.09683	2.23062	1.73661
SS.CHR1.411	40.2792	45.0285	43.3969	38.9725	44.3673	38.7567	32.4127	35.9343	35.6442	29.8612
SS.CHR1.412	80.1445	49.9714	50.3256	49.176	62.4395	75.174	45.6237	75.2942	37.9238	54.2078
SS.CHR1.415	0.754835	1.12672	1.43168	0.969772	1.21478	0.975032	0.779419	0.710838	0.775363	0.925041
SS.CHR1.416	0.109474	0	0.369599	0	0	0.057201	0.467177	0	0	0.049068
SS.CHR1.414	48.637	46.0643	43.7794	53.7382	52.3923	53.2155	46.5645	49.5242	53.7869	62.2132
SS.CHR1.418	0.244069	0.150804	0.170315	0.500219	0.825437	0.125775	0.398627	0.130669	0.126748	0.31833
SS.CHR1.417	31.8905	30.5926	28.724	18.4659	27.0906	20.4158	18.935	21.5147	29.6647	30.3107
SS.CHR1.419	4.58451	6.13783	3.90021	5.12442	5.45808	1.80887	4.08279	4.47067	5.38486	5.13167
SS.CHR1.420	4.49042	0	0	1.95281	0.462666	0	0.871239	0.574306	1.71992	2.18367
SS.CHR1.421	0.080072	0	0	0.07498	0	0.161498	0.252597	0	0.153302	0
SS.CHR1.423	0.213404	0.143727	0.486077	0.394923	0.124273	0.156264	0.09511	0.288698	0.09618	0
SS.CHR1.422	14.0143	10.6174	8.78427	4.89152	5.84564	9.47137	8.26908	7.82428	11.051	4.92915
SS.CHR1.426	0	0.137966	0	0	0	0.161453	0.074483	0	0	0
SS.CHR1.424	24.753	59.2809	65.573	62.9235	51.0827	58.021	54.0367	45.3046	52.644	46.4982
SS.CHR1.425	1.98117	0.631054	0.073791	0.101391	1.37889	0.172333	1.70856	2.26907	0.682211	2.0455
SS.CHR1.428	5.15476	4.43862	3.36118	4.29666	3.92617	5.58957	4.48301	5.63298	5.03404	4.15155
SS.CHR1.429	9.67715	8.12785	8.485	9.50214	6.98968	8.99776	9.89283	12.82	9.78152	11.842
SS.CHR1.434	0.203802	0.064557	0.128426	0	0	0.171446	0.120792	0.261834	0	0.163875
SS.CHR1.430	14.0998	9.26772	12.4368	11.2877	11.4563	10.1964	11.9333	11.7672	10.2238	8.9047
SS.CHR1.432	5.96881	2.96785	6.56787	1.16588	4.19723	5.71084	2.2181	3.77843	1.47922	4.43335
SS.CHR1.438	0.603421	0	0	0	0	0	0.052576	0.19385	0	0.052295
SS.CHR1.440	12.6153	6.39269	10.821	10.2193	6.8961	13.1715	12.2712	11.4841	16.2117	4.72424
SS.CHR1.441	22.7541	24.1033	19.194	18.3396	19.1514	15.113	21.1446	22.613	21.1105	14.0362
SS.CHR1.442	14.25	13.6984	10.5665	10.54	7.84366	8.34862	8.95294	15.3021	13.1123	13.4875
SS.CHR1.443	22.8635	17.3728	27.3017	8.85914	18.0296	14.0653	14.0714	13.8746	16.0448	15.618
SS.CHR1.444	38.4213	51.0381	40.9828	56.41	45.1245	30.5941	36.2856	45.0161	52.3277	37.0155
SS.CHR1.445	12.7323	12.2354	18.7862	7.26893	14.1939	11.3477	10.9886	10.8874	10.1436	14.1841
SS.CHR1.446	0	0	0	0	0	0	0	0	0	0
SS.CHR1.450	1.28866	0	0.465936	0	0	0.190166	0	0	0	0
SS.CHR1.449	9.99783	13.9999	13.092	14.701	10.4518	11.0656	13.2895	16.0542	12.0859	18.8032
SS.CHR1.452	1.77929	3.10201	2.37631	2.9638	2.22865	2.51519	3.12697	2.77041	3.0048	2.58973
SS.CHR1.451	11.2182	9.23219	9.03294	8.1174	9.66439	8.95691	7.86312	8.32049	6.36589	6.4468
SS.CHR1.456	0.681467	0.363315	0.544707	0.377835	0.044514	0.790504	0.739383	0.382439	0.459538	0.883381
SS.CHR1.459	0.623576	1.22696	0.765353	0.139452	0.779779	0.881441	0.833112	3.50898	0.958557	1.16911
SS.CHR1.457	0	0	0	0	0	0	0	0	0	0
SS.CHR1.458	8.42749	4.98471	5.20033	2.94525	2.79657	5.56355	6.62616	5.58649	2.93939	2.65082
SS.CHR1.463	3.34492	3.63259	4.46114	2.49299	2.59763	6.71509	5.67092	7.1725	3.11783	3.51545
SS.CHR1.464	0.809503	0.687228	0.516395	1.40611	1.13841	0.914593	0.607392	3.48786	0.376553	1.78882
SS.CHR1.461	0.032537	0.053737	0.089579	0.096165	0.04958	0.072638	0.066163	0.079769	0.079012	0.006489
SS.CHR1.462	19.5452	12.5494	21.8274	17.7087	17.2942	25.4121	15.3643	19.9866	15.5408	11.5772
SS.CHR1.466	0	0	0	0.326961	0	0	0.057067	1.71593	0	2.16976
SS.CHR1.465	22.1102	20.3996	20.6125	14.8451	21.7528	21.3028	19.4728	19.3785	18.0838	15.8932
SS.CHR1.467_SS.CHR1.468	3.36763	2.21557	2.42499	2.11382	3.88157	3.68052	2.93838	3.11298	4.62992	3.34217
SS.CHR1.469	2.57605	1.88383	1.67064	2.54045	1.55715	2.57648	1.92117	1.71461	2.37086	3.99947
SS.CHR1.475	0	0	0	0	0.074323	0	0.074945	0	0	0.148065
SS.CHR1.473	5.42219	4.30814	3.39032	6.35392	4.51745	4.35276	4.46278	4.68994	3.8845	3.64295
SS.CHR1.474	3.46012	2.22932	3.38241	1.40827	2.52108	2.68692	2.10163	1.27854	2.82872	2.93869
SS.CHR1.476	8.07538	12.1068	20.9204	4.72821	8.07365	6.42992	1.04685	1.72331	6.22798	4.1201
SS.CHR1.477	19.9016	25.4841	45.6807	32.2212	40.4325	37.1396	29.8204	19.8329	38.1283	35.9771
SS.CHR1.479	0.462123	0.421001	1.05071	1.53143	1.53904	1.4454	0.439586	0.628386	1.38084	1.25726
SS.CHR1.478	57.179	36.0746	47.977	27.0525	21.8252	24.0168	33.2755	53.5536	57.6983	33.1039
SS.CHR1.483	92.7716	50.7307	84.6848	56.7866	74.4295	62.3418	67.8989	84.13	84.2551	63.6901
SS.CHR1.484	12.1159	12.2082	10.829	9.77125	10.566	7.88635	6.54169	9.677	8.79217	6.29637
SS.CHR1.486	0	0	0	0	0	0	0	0	0	0
SS.CHR1.487	1.10239	2.60694	1.60197	1.22513	0.817386	1.14735	2.19244	0.763448	0.625516	4.80715
SS.CHR1.488	10.6738	12.6967	5.11304	11.2715	5.15533	26.5964	20.1503	23.054	20.1352	28.9282
SS.CHR1.489	1.00409	0.618937	1.26907	1.16976	1.50689	1.54525	1.62802	0.847704	2.08618	0.676882
SS.CHR1.492	0	0	0	0.028776	0.472309	0.033469	0	0	0	0
SS.CHR1.494	0	0.0752	0	0	0.124778	0.116284	0.163772	0	0	0
SS.CHR1.490	1.04857	0.253394	0.780641	0.133816	0	0.765688	0.378814	0.16812	0.641108	0.399659
SS.CHR1.497	1.784	0.65461	0.848364	2.05165	0	0.179682	0.901588	0	0.00856	0
XLOC_000595	0.013626	0.049526	0.2545	0.317988	0	0	0	0	0	0
SS.CHR1.505	68.7498	48.9851	47.1056	141.892	24.1835	36.764	74.3489	80.4681	50.4553	63.7034
SS.CHR1.512	0.493154	0.84337	0.404293	0.723526	0.053867	0.588619	0.327171	0.35851	0.691938	1.00657
SS.CHR1.509	19.881	17.5726	22.0645	16.8116	12.3955	22.917	14.3828	27.7589	14.1711	19.0597
SS.CHR1.513	7.63936	11.8821	10.4006	11.7628	11.6471	8.42544	8.59579	13.1476	12.6302	11.5216
SS.CHR1.506	113.765	77.5534	77.4893	72.1593	82.8384	74.8132	84.1119	63.4715	67.7149	104.75
SS.CHR1.507	56.0666	68.3934	58.6219	84.4188	43.1691	26.1694	51.5338	62.4776	33.37	22.9186
SS.CHR1.508	36.775	26.6931	35.0251	38.7735	35.0673	29.3538	45.1427	35.8236	32.7461	47.6814
SS.CHR1.515	0	0	0	0	0	0	0	0	0.051579	0
SS.CHR1.516	10.4337	5.13023	3.96301	5.16606	6.37086	5.17272	6.22065	5.15551	3.74684	9.16777
SS.CHR1.518	13.8841	13.9788	9.4538	16.7191	9.38345	8.24663	12.1622	20.6018	8.96923	18.823
SS.CHR1.519	8.59141	6.6033	6.25126	5.84094	4.0415	6.11977	6.81	6.14569	7.58519	7.05019
SS.CHR1.521	2.03814	2.58947	1.35042	3.05254	4.78348	3.73218	2.88978	3.80551	2.58916	1.64972
SS.CHR1.523	1.54795	1.47481	1.46405	1.62377	1.66788	1.58905	0.907933	0.758381	0.834687	1.16305
SS.CHR1.522	8.65166	6.06508	6.34958	7.93688	6.36921	6.63735	8.80858	8.82406	9.25788	9.01773
SS.CHR1.525	17.836	24.4697	21.4926	24.8338	23.7137	21.7487	20.4954	21.615	19.9018	22.4629
XLOC_000642	0.850832	0.171253	0	0.173433	0.052764	0.052838	0.123564	0.013321	0	0
XLOC_000643	1.64057	0	0	0	0.044657	0.017043	0.051356	0.157287	0	0
XLOC_000645	1.02065	2.23114	0.577664	0.861538	2.14944	0.901954	1.83771	3.979	0.18463	0.514627
SS.CHR1.533	0.231786	0.781141	0.153896	0.524463	0.780346	0.697074	0.449351	0.676818	0.36874	0.495045
SS.CHR1.534	0	0	0.021457	0	0	0.022122	0	0	0.0111	0
SS.CHR1.528	28.2122	20.8401	17.8999	17.4209	16.4382	17.6474	17.0269	19.3425	23.3604	18.9284
SS.CHR1.529	0.720985	0.704928	0.880287	0.30377	1.68913	0.912962	0.38923	0	0.778119	1.08291
SS.CHR1.530	3.76937	2.17528	1.90515	1.59555	5.18642	3.94437	1.75909	3.04316	3.25032	2.50058
SS.CHR1.532	38.6552	29.2168	23.6849	28.6573	23.8665	35.4742	32.078	37.9673	55.3041	38.1823
SS.CHR1.535	13.392	24.6228	19.8876	27.0617	16.5482	22.0697	24.1865	20.1126	21.7166	18.9585
SS.CHR1.536	5.86444	4.75237	4.23201	6.3218	4.89269	5.14776	4.37925	4.31281	7.49284	3.88625
SS.CHR1.538	0.16954	2.0683	0.729805	0.222662	0.453916	0	0	0.116655	0.40363	0.565345
SS.CHR1.537	23.7375	17.9915	18.8976	30.6662	16.0352	20.3067	17.9715	22.3983	23.683	22.2043
SS.CHR1.539	33.2017	30.0586	22.9179	26.7902	31.3475	26.7676	16.6547	24.3496	53.1619	38.8481
SS.CHR1.540	0	0.378543	0.80327	0.391591	0.534641	0.376318	0.446696	0.622039	0.285766	0.885919
SS.CHR1.541	1.62547	1.86551	1.50679	1.2719	1.5944	2.08195	1.75312	1.70032	1.48691	1.41195
SS.CHR1.542	11.8112	15.1391	9.46386	8.89719	13.0863	7.46053	6.84441	7.06642	12.463	5.59915
SS.CHR1.543	5.01796	2.78274	4.05936	5.76189	2.25661	3.4169	3.63607	7.55327	4.72083	4.48167
SS.CHR1.545	0.014455	0	0	0	0	0	0.023817	0	0	0
SS.CHR1.544	18.9027	17.9594	17.3009	15.0489	17.0432	16.3955	12.0144	20.784	9.35892	13.9336
SS.CHR1.548	0.039611	0.037329	0.130865	0	0.040105	0.106271	0	0.89812	0	0
SS.CHR1.547	3.26511	4.09018	5.04889	4.26748	4.53888	2.20755	4.03284	2.11192	2.45167	3.29448
SS.CHR1.546	4.3833	9.48744	11.6187	8.99113	4.79212	14.8339	8.78144	5.08824	15.0193	11.2369
SS.CHR1.549	5.58362	4.53458	6.86281	5.18893	5.58671	5.75157	4.74389	5.17509	6.06346	7.15385
SS.CHR1.551	82.472	53.9484	67.5064	24.5287	30.8817	48.1706	22.903	19.1877	39.4661	29.2022
SS.CHR1.552	21.995	31.6485	19.6694	39.8739	43.9462	27.0591	30.6671	30.6627	30.8645	20.0024
SS.CHR1.554	16.0436	15.5367	9.40237	13.5387	16.7946	14.6582	16.2848	26.0471	17.462	23.9698
SS.CHR1.555	10.7715	11.1574	9.57431	10.6519	7.50302	9.32703	9.38341	8.63865	8.02098	8.29297
SS.CHR1.556	39.6207	50.5132	44.4391	38.2153	41.5569	37.16	46.7236	45.0143	40.6379	52.3335
SS.CHR1.560	1.39351	1.02869	1.16975	0.750385	3.86361	2.18884	0.595674	1.96137	1.8528	1.31764
SS.CHR1.559	8.6319	9.09651	9.54761	9.34032	11.1999	11.6864	8.86419	12.0087	4.86942	8.25032
SS.CHR1.561	11.3859	10.9094	8.02765	10.6962	9.9526	15.6071	11.6015	10.9905	13.7983	16.9289
SS.CHR1.563	0.701238	0.513493	1.19076	0.960176	1.15072	0.643549	0.709365	1.13307	0.600188	0.542061
SS.CHR1.562	35.1678	45.174	32.1108	35.8619	34.4097	40.473	33.6889	33.2314	50.6784	44.7114
SS.CHR1.564	39.3327	52.2107	44.0009	44.4993	58.4956	75.3855	51.252	80.1347	60.2951	53.5412
XLOC_000722	0.029737	0	0	0	5.53587	0.024333	0.19297	0	0.02646	0
SS.CHR1.566	2.62315	5.37103	2.73904	11.5596	4.62659	6.75456	5.77929	3.76292	2.07387	3.30544
SS.CHR1.567	22.2462	36.0467	35.5104	90.8975	36.0216	56.106	33.9052	30.7237	76.2031	52.1934
SS.CHR1.571	1.44131	1.04824	1.73483	1.13817	1.05605	0.218687	0.409747	2.00216	1.2533	1.68854
SS.CHR1.572	0.142223	0.117515	0.157615	0.124179	0.153567	0.123132	0.147514	0.002863	0.007802	0.003726
SS.CHR1.568	0	0	0	0	0	0	0.046284	0	0	0
XLOC_000724	0.946259	1.28866	1.21129	1.48895	1.51997	1.60469	1.44418	1.67719	3.38024	1.59823
SS.CHR1.569	11.413	13.4994	10.2358	13.5207	10.3288	12.0391	9.49656	10.5735	16.1879	10.9487
SS.CHR1.573	5.4798	5.74478	8.40094	7.77471	5.82227	6.78903	6.32498	6.77268	6.00681	5.79692
SS.CHR1.574	19.9275	15.5533	17.4456	19.7023	14.9028	13.7282	13.046	16.6855	18.916	17.1443
SS.CHR1.575	9.31517	10.9711	9.74561	10.6535	7.52548	10.0695	9.51916	10.3243	10.3065	9.38019
SS.CHR1.576	23.584	31.1897	35.2597	35.1287	29.8988	28.7869	44.6885	28.7581	28.6079	36.2111
SS.CHR1.580	0.097674	0.37245	0.094608	0.106942	0	0.267009	0.305559	0	0.180767	0.156348
SS.CHR1.579	14.6871	12.358	14.7166	16.6231	12.5724	16.3462	17.2205	17.8617	13.9453	15.5282
SS.CHR1.581	1.14677	1.13305	0.599051	0.503711	0.458369	1.12073	1.35947	1.58125	0.824867	0.346282
SS.CHR1.583	33.339	45.0585	35.5358	42.3217	29.3882	46.8552	31.1289	47.7211	75.2695	38.541
SS.CHR1.586	12.1885	7.08951	8.77468	7.83283	8.86798	12.5768	9.35114	11.4537	43.057	10.5934
SS.CHR1.587	18.7708	32.3209	21.9063	24.3041	15.4866	24.336	21.8901	18.5297	17.77	23.8756
SS.CHR1.588	0.677912	2.9046	0.756556	1.18705	0.010937	1.42163	1.2323	2.145	0.535214	1.11922
XLOC_000776	0.362006	0.549981	0.327152	0.392629	0.589218	0.242605	0.556853	0.531613	0.887038	0.203771
SS.CHR1.594	16.6576	14.7393	14.323	16.491	13.0147	15.1226	13.3886	19.946	12.0318	14.2487
SS.CHR1.603	8.05837	3.82713	4.84572	3.32955	5.31872	6.27824	4.75865	3.28261	6.81881	6.92569
SS.CHR1.602	41.2075	38.2909	37.0853	41.3169	36.6372	36.0373	37.2912	39.732	40.2961	41.2831
SS.CHR1.604	6.16325	7.1411	7.01991	5.73053	5.83324	8.04053	9.7025	7.31457	7.50557	6.59414
SS.CHR1.606	0	0	0	0	0	0	0.196415	0	0.041289	0
SS.CHR1.607	0.403775	0.075561	0.70768	0.093014	0.587174	0.185373	0.289446	0.048189	0.317955	0.399894
SS.CHR1.605	19.4161	21.2587	29.5393	21.2346	36.6204	27.7777	22.2424	23.4011	27.775	26.7515
SS.CHR1.610	0.30924	0.406237	0.345168	0.480862	0.673088	0.549615	0.308992	0.616176	0.244733	0.198766
SS.CHR1.608	22.8933	27.7269	22.7163	26.8217	25.8845	28.7191	26.8725	32.0349	22.6432	29.9465
SS.CHR1.613	47.6878	43.9643	42.4538	39.8711	43.4128	38.9221	39.4519	52.4111	37.9799	41.9647
XLOC_000804	0.007411	0	0.138711	0	0	0	0.019042	0.06252	0.636916	0
XLOC_003022	0.029555	0.04986	0.84762	0.158368	0.088626	0.032802	0.09322	0.013054	0.016112	0.010939
SS.CHR1.616	6.79388	4.44467	7.20958	3.5615	5.99245	3.87979	5.48555	8.22828	5.42385	3.60219
SS.CHR1.614_SS.CHR1.615	37.6846	27.8307	34.4551	41.5918	47.4549	38.4022	28.9526	29.4626	31.0967	30.9647
SS.CHR1.621	0.024747	0.049786	0	0.157961	0.053488	0.122481	0.33641	0.04127	0.094016	0.106915
SS.CHR1.622	0	0	0	0	0	0	0	0	0	0
SS.CHR1.623	0	0	0	0	0	0.009817	0.409438	0	0	0
SS.CHR1.618	0.740451	0.19654	0.863553	0.217675	0.391501	0.202332	0.343835	0.900732	0.606101	2.1348
SS.CHR1.619	13.0403	14.2442	12.5386	14.5784	12.2449	12.4932	13.2188	13.4534	10.7488	12.5258
SS.CHR1.624	15.1265	18.1991	19.1838	15.5783	17.3564	16.3123	16.1604	17.4828	14.7426	16.2397
SS.CHR1.625	2.64772	1.07491	5.83215	1.69832	2.32074	3.12728	5.76897	2.27864	6.99163	5.00913
SS.CHR1.629	4.74137	4.0567	2.79406	5.37221	3.30619	2.73643	3.11708	4.40504	4.44911	2.75984
SS.CHR1.628	17.356	7.89823	8.99642	10.3707	10.5082	12.9059	7.17789	17.0369	10.6816	13.2347
SS.CHR1.634	1.14484	1.28364	1.11404	0.683727	0.519619	1.55919	0.627965	0.180159	0.872315	0.612442
SS.CHR1.638	0.053251	0	0	0	0	0	0	0	0	0
SS.CHR1.633	27.6665	27.9162	19.1502	45.2329	19.7083	19.7386	21.9205	30.8819	29.3336	28.5158
SS.CHR1.641	0	0.050618	0	0	0.060672	0	0	0	0	0
SS.CHR1.639	3.14786	4.0748	3.8548	4.35564	3.51877	3.59954	5.58935	4.23958	4.38151	3.78949
SS.CHR1.640	9.48935	7.3072	11.6051	10.0131	9.6161	10.386	8.20814	7.46072	10.7295	12.2775
SS.CHR1.642	76.3666	127.061	132.832	104.329	102.011	59.8881	86.9062	123.524	93.569	74.4537
SS.CHR1.643	6.38134	19.7317	7.99103	17.9798	41.0341	6.46461	10.3919	27.644	3.10962	7.42057
SS.CHR1.646	2.08618	2.16056	1.10637	2.26647	2.83563	1.47121	0.99154	1.07834	1.85502	1.25332
SS.CHR1.647	16.3424	12.5962	13.7158	9.53919	15.349	15.0903	12.82	20.6388	14.9344	11.9055
SS.CHR1.648	1.55343	0.912044	0.680915	2.29521	1.53447	1.34382	1.40621	0.907113	1.49154	1.35208
SS.CHR1.649	14.1931	12.4378	8.99823	11.9907	11.7834	8.69128	9.92462	11.9896	11.371	8.52892
SS.CHR1.652	0.818798	0.634889	0.69348	0.468439	0.123182	0.669303	0.928604	0.532043	0.903848	0.211261
SS.CHR1.650	5.46445	2.61164	6.11184	2.44549	0.97904	4.15095	5.25208	1.37694	5.43248	5.93889
SS.CHR1.653	0	0	0	0	0	0	0	0	1.36621	0
SS.CHR1.654	4.15465	7.87003	7.37294	6.0671	4.96415	4.72173	4.86624	6.22251	5.47924	6.2459
SS.CHR1.655	8.77079	6.46257	8.84105	7.94805	11.0692	8.95405	7.79513	7.7543	5.80035	8.51165
SS.CHR1.657	9.20078	8.54274	6.14349	11.3021	12.4912	11.797	7.84697	13.5026	9.26507	13.1942
SS.CHR1.658	6.12668	4.42045	4.06322	2.09394	2.49458	3.73453	5.10526	3.97538	2.00312	2.80466
SS.CHR1.659	2.32137	0.52223	0.617955	0.404179	0.318584	0.639911	0.520024	0.466864	0.677274	0.835754
SS.CHR1.662	0.289083	0.034897	0.09452	0.034344	0	0	0.08739	0.077185	0.014675	0.087257
SS.CHR1.665	3.73328	2.69435	8.8129	1.21125	2.07613	1.45373	2.30338	2.10304	1.53768	0.594544
SS.CHR1.670	7.13798	7.79404	10.7343	8.46177	8.08248	8.23665	7.0058	8.00863	7.33056	11.1511
SS.CHR1.673	2.47845	1.58377	2.32398	0.791488	2.03228	1.92806	1.50525	1.8259	0.957534	1.17242
SS.CHR1.681	0.210198	0.182046	0.456597	0	0	0.041983	0	0	0.096677	0.470057
SS.CHR1.683	0.905708	1.85601	1.51923	1.64585	2.37947	2.90575	0.792838	2.11556	2.55528	2.83736
SS.CHR1.674	6.31643	6.93081	5.46647	8.5717	8.34102	5.39835	8.81099	5.22023	6.87598	2.93155
SS.CHR1.684	0.031263	1.45057	1.5712	1.42875	2.29815	3.23622	0.136911	0.08028	2.17576	1.76964
SS.CHR1.685	0.902973	3.58383	3.7946	3.82571	7.31709	8.39714	1.47659	1.22999	3.11927	5.1933
SS.CHR1.688	0.920658	1.92936	2.74568	4.5385	1.73478	2.26789	2.07283	2.35211	3.67966	3.35516
SS.CHR1.686	29.3784	27.3648	25.1101	31.5707	28.5522	22.9715	23.1302	30.0844	29.1831	29.5107
SS.CHR1.692	1.04783	0.787651	0.271457	0.824449	0.701079	0.539835	0.564101	0.4437	0.597854	0.773448
SS.CHR1.689	10.3326	11.1157	11.7976	10.3742	12.1756	10.3037	10.945	11.2453	9.80531	8.69914
SS.CHR1.693	29.6214	20.1523	20.7655	20.6629	22.0585	14.6164	17.1557	21.0266	12.7449	19.3508
SS.CHR1.697	6.3819	4.45403	5.24041	5.38078	4.87841	4.20995	4.72804	7.06565	5.65419	5.93958
SS.CHR1.699	0.352348	0.006669	0.612423	0.185263	0.294506	0.655353	0.071228	0	0.951526	0.05484
SS.CHR1.701	2.21813	1.91232	2.36997	2.14064	1.85417	2.10698	0.791107	2.42957	2.5417	2.88211
SS.CHR1.702	0.399464	0.408075	0.355694	0.758717	0.347109	0.595969	0.257106	0.760811	0.346785	0.415964
SS.CHR1.709	5.28462	8.14946	10.1719	4.46316	6.8292	7.30147	8.87746	5.46014	5.58207	8.013
SS.CHR1.708	0.110548	0.054631	0	0	0	0.116929	0	0	0.033357	0.00743
SS.CHR1.710	91.8129	119.493	142.575	46.5514	85.504	80.6681	111.319	53.3726	91.3271	114.043
SS.CHR1.714	0	0	0	0	0	0	0	0	0	0
SS.CHR1.711	54.9401	43.6014	52.5989	30.5206	57.7212	45.7435	29.3193	66.5027	38.8649	34.6436
SS.CHR1.718	0	0	0	0	0	0	0	0	0.040487	0.046502
SS.CHR1.719	2.66656	1.49648	1.78743	1.41896	1.32022	2.33565	2.24564	2.37216	2.27772	1.62118
SS.CHR1.724	0	0	0	0	0	0	0	0	0	0
SS.CHR1.725	13.5911	17.2008	12.3472	15.4283	13.0532	13.6606	9.58162	15.2692	12.7552	16.6766
SS.CHR1.726	0.925375	1.00743	1.0171	1.2469	0.469553	0.467266	0.316499	0.782597	0.698607	1.499
SS.CHR1.729	31.0974	30.4978	30.6072	30.7503	30.7656	29.0172	29.5305	24.6109	29.4718	40.7364
SS.CHR1.752	14.3115	14.8616	13.259	12.9394	13.2341	12.9005	12.778	14.6241	9.7852	15.884
SS.CHR1.751	9.40257	10.0079	8.78773	9.93664	8.94733	8.83896	8.24186	9.69587	10.7551	10.8818
SS.CHR1.756	17.169	12.711	9.25921	13.2741	12.5201	11.7212	12.3921	15.4336	10.9049	13.2829
SS.CHR1.769	2.98898	0.062946	0.106821	1.06437	3.16345	0.182122	0.025779	0.021832	0.062761	0
SS.CHR1.774	4.50128	3.89693	4.54294	6.61453	5.32578	4.67621	3.91493	6.38082	3.99334	8.36098
SS.CHR1.775	4.82033	5.57072	5.28211	7.28847	9.0602	2.59587	5.21663	4.37409	4.18907	5.38914
SS.CHR1.779	1.57565	1.42328	1.87075	1.45733	2.33166	1.70873	1.2832	2.52118	1.20161	1.53511
SS.CHR1.777	17.0838	14.8267	14.9893	12.75	14.1961	15.6773	13.6336	20.7083	16.9032	16.7655
SS.CHR1.782	0.86878	0.222545	1.6794	1.59206	0.805368	0.488673	0.359144	1.11963	0.832072	1.15277
XLOC_001042	0	0	0.159932	0	0.012294	0.595741	0.17298	0.021723	0	0
SS.CHR1.784	9.9753	8.64481	6.48162	7.19683	9.22392	6.83246	6.92956	10.2855	7.60358	8.45254
SS.CHR1.786	16.6608	17.106	15.9124	18.5836	17.9016	17.498	18.1631	22.7275	29.0053	16.5875
SS.CHR1.793	0.234039	0.817716	0.3676	0.836569	0.938285	0.452294	0.890132	1.12805	1.39509	0.632422
SS.CHR1.797	5.93491	5.7873	4.11072	2.46675	1.83878	4.2525	5.59873	2.9974	8.3976	6.27705
SS.CHR1.798	2.2555	1.72156	1.8385	1.98286	2.34435	1.89392	2.75762	1.93171	2.08431	2.00872
SS.CHR1.800	13.9282	12.1798	10.3663	12.0984	18.9318	15.5121	10.7926	17.904	12.1411	13.0039
SS.CHR1.803	10.7432	9.58552	10.3733	7.12402	6.67416	9.1948	6.92953	7.65958	10.9913	8.50427
SS.CHR1.805	0.030528	0	0	0	0	0	0	0	0	0
SS.CHR1.804	9.52446	9.59427	7.87083	9.37415	11.1886	10.3011	10.9597	9.68552	7.99102	9.18331
SS.CHR1.806	3.45509	11.9844	6.39525	1.62091	0.534174	4.20756	2.6654	1.34221	4.77752	2.35465
SS.CHR1.807	12.3087	9.93166	17.2178	10.1659	7.7904	12.0265	10.7153	9.15526	15.01	8.83995
SS.CHR1.812	24.5046	21.1279	29.2175	19.3581	21.3852	17.5117	25.6215	25.1244	24.7968	25.256
SS.CHR1.814	0.159663	0.152742	0	0	0	0	0	0	0.179632	0
XLOC_003304	5.5353	2.2032	0.946045	3.23646	7.30098	3.24188	2.89754	2.04092	0.034046	1.55069
SS.CHR1.816	0.379464	0.270936	0.051904	0.113458	0.280763	0.226019	0.112455	0.486379	0.328803	0.094562
SS.CHR1.817	19.9876	30.2937	28.5553	19.0353	27.7518	24.7597	22.4812	11.9	22.3631	29.1798
SS.CHR1.823	0.105862	0	0	0	0	0	0	0	0	0
SS.CHR1.821	24.1834	21.634	23.4172	26.8986	14.565	20.7702	28.3122	26.7687	24.3023	38.4656
SS.CHR1.824	17.9791	12.4906	12.5261	12.0696	15.5693	12.8159	12.5231	13.0968	11.2472	14.7253
SS.CHR1.825	4.17128	3.56878	4.1886	5.26776	4.13907	3.95184	3.5835	4.07622	6.79174	3.52344
SS.CHR1.829	0.055093	0	0.121544	0	0.05606	0.041477	0.21251	0	0	0.028014
XLOC_003342	0.266865	0.280366	0	0.237213	0.00482	0.24647	0.37627	0.282262	0.018178	0.150321
SS.CHR1.831	1.45613	0	0	2.62717	0	0.018367	3.64098	2.84866	0	2.73721
XLOC_003346	1.17347	0.736717	0	0.506203	0	0.862526	0.759691	1.23691	0.082218	0.201559
SS.CHR1.835	4.93086	9.09027	13.114	22.6168	8.95567	14.7184	14.703	5.89096	32.8494	6.86684
SS.CHR1.838	5.04317	5.06116	6.05816	5.8182	5.68328	4.66709	9.03705	4.01766	5.25478	4.2774
SS.CHR1.826	19.7723	22.0051	18.4192	19.3591	17.9319	20.0359	22.1448	21.8733	18.564	18.0191
SS.CHR1.843	0.172511	0.322128	0	0.785474	0.033219	0.565066	0.086423	0	0.512683	0
SS.CHR1.839	14.1276	12.2715	9.21891	18.2133	12.1233	9.85952	9.42619	10.0801	9.16723	17.1142
SS.CHR1.845	1.15744	1.39197	1.10039	0.738936	1.33179	1.07778	3.40078	0.925583	0.74633	2.21347
SS.CHR1.846	0.933124	0.581353	0.997886	0.683096	0.69834	0.679736	0.857077	1.74024	1.0815	0.981925
SS.CHR1.847	1.70487	0.759854	2.02153	1.39702	0.343813	1.72113	2.15928	2.34172	3.43918	2.40387
SS.CHR1.848	6.77083	5.3852	5.61145	7.65934	5.7599	6.00108	6.01004	6.53676	8.21288	5.31352
SS.CHR1.850	6.71232	9.93056	6.80333	8.6767	7.49113	3.99259	7.41474	5.00804	11.9344	8.68495
SS.CHR1.849	0	0	0	0	0	0	0	0	0	0
SS.CHR1.851	10.5773	17.2208	22.5121	21.4867	7.74748	12.1522	11.9302	12.7474	20.3436	16.6269
SS.CHR1.853	0.148811	0.176216	0.587016	0.048215	0.106852	0.242624	0.092289	0	0.056722	0.284749
SS.CHR1.852	29.2442	19.2335	18.7423	20.1793	21.7942	17.3423	19.3397	20.1786	19.2834	15.6947
SS.CHR1.854	5.92013	7.75155	5.45517	17.9536	6.88909	7.43339	8.01905	6.76629	9.09995	10.0235
SS.CHR1.855	10.1593	7.85268	11.5653	8.36802	13.4238	15.8257	9.75857	5.56379	10.2692	17.1197
SS.CHR1.858	2.20111	1.34959	1.61001	2.6926	2.03233	2.37691	1.72973	2.02163	2.40276	5.27318
SS.CHR1.856	0.294466	0.377518	1.09494	0.968143	0.326095	0.345276	0.268526	1.90722	1.04365	1.24411
SS.CHR1.857	0	0.019902	0	0	0	0.072954	0	0.056672	0	0
SS.CHR1.860	3.64056	2.89098	5.68602	1.89851	2.78878	3.11308	3.3471	5.31095	3.96461	2.33378
SS.CHR1.862	0.069265	0.126556	0	0	0	0	0	0	0	0
SS.CHR1.861	0.696655	0.167828	0.87329	0.332717	0.538918	0.36365	0.302714	0.245293	0.718565	0.602402
SS.CHR1.867	0.598909	0.343687	0.092911	0.1995	0.044168	0.440161	0.516849	0.16629	0.195189	0.179131
SS.CHR1.863	0	0.094048	0.327438	0	0.076378	0	0.05734	0.100133	0.06321	0.191542
XLOC_001189	1.35804	1.69219	3.05039	0.439046	0.778621	2.44234	2.51862	2.92489	11.9877	4.68912
SS.CHR1.878	16.561	3.71925	14.8452	4.57778	6.1242	10.777	11.1935	5.39309	4.64986	7.28801
SS.CHR1.880	0.725218	0.367419	0.145759	0.277425	0.134345	0.114433	0.363092	0.681555	0.190347	0.235052
SS.CHR1.881	0.376734	0	0.216779	0	0	0.267009	0.11894	0.120187	0.247384	0.308856
SS.CHR1.889	1.31365	0.874292	0.877816	1.65162	0.701015	1.15174	0.249992	1.62374	1.564	0.396318
SS.CHR1.890	16.9546	15.9294	15.9858	11.6504	13.059	15.9578	14.5124	13.5465	12.886	16.879
SS.CHR1.895	0.955951	0	0	1.57373	0.134544	0.414207	0	2.33981	0.262762	2.24229
SS.CHR1.894	2.34553	0.943662	0.369504	0.700902	0.747023	1.20463	1.16734	2.22688	1.38285	1.64269
SS.CHR1.893	1.21866	1.47539	1.52954	1.42775	1.59414	1.3388	1.33908	1.8433	1.18608	1.59451
SS.CHR1.900	3.2563	2.97999	2.5555	3.17666	2.5815	2.82284	2.41174	3.41436	4.77138	3.92274
SS.CHR1.902	4.17499	3.54519	2.97522	4.65136	2.53622	5.60957	3.49556	2.81541	3.26076	3.29567
SS.CHR1.903	5.75363	5.75568	1.79318	7.81247	2.04154	9.25742	4.64647	3.2107	5.91134	6.70024
SS.CHR1.906	10.3697	8.67071	9.73144	10.5779	8.3013	9.33492	9.10714	10.9659	9.80396	13.6747
SS.CHR1.909	0.187734	0.105258	0.37238	0	0	0.107107	0.088091	0.349022	0.660642	1.28417
SS.CHR1.907	0.15005	0.173522	0.045689	0.12654	0	0	0.079597	0.07447	0.036423	0.500828
SS.CHR1.908	15.6486	27.8926	24.4433	11.1576	15.583	18.8169	18.2568	20.3212	15.3336	22.5414
SS.CHR1.914	21.9028	18.9138	17.8386	28.9256	18.1789	18.58	21.4438	18.6252	16.7663	22.2674
SS.CHR1.922	0.125524	0	0	0	0	0.400514	0	0.112655	0.22413	0
SS.CHR1.930	1.69133	1.00161	0.909708	0.99517	0.344894	0.054623	0.191463	0.187963	0.363624	0.169011
SS.CHR1.925	2.07824	0.801338	1.19076	1.14015	0.044699	1.57302	0.16159	0.368765	0.167508	0.054215
SS.CHR1.926	2.80793	3.77001	3.61289	3.68362	3.55244	2.76828	2.69907	3.04509	2.84607	4.11215
SS.CHR1.918	7.94346	5.56846	7.73726	6.00502	5.74883	6.01824	6.79851	6.50823	5.25913	8.32616
SS.CHR1.921	27.3016	21.175	23.2747	18.1752	23.287	22.5022	22.2624	25.2759	21.6486	29.7786
SS.CHR1.932	17.2205	7.1717	12.0256	4.99732	4.99546	7.2845	5.05025	10.4555	8.12213	9.64918
SS.CHR1.933	46.3441	49.6479	72.5381	42.923	91.6369	63.7115	51.6129	47.1079	47.1821	50.7075
SS.CHR1.936	0	0.872072	0.302182	0.186163	1.81066	0.508977	0.9605	0.419905	0.084381	0.169746
SS.CHR1.935	0.060286	2.0865	1.43632	0.519427	3.19307	2.01882	3.30457	0.928822	0.719763	1.24322
SS.CHR1.937	0.672536	0.615217	0.624765	0.376512	0.558108	0.646257	0.490399	0.45748	0.372074	0.999497
SS.CHR1.938	0.121764	0	0.148194	0	0.030149	0.357678	0.090312	0.015654	0.289201	0.092872
SS.CHR1.934	27.4525	23.4282	29.2612	27.7529	21.0534	27.6386	21.1923	29.663	39.5672	26.7999
SS.CHR1.939	5.24882	4.80049	3.0885	3.62844	3.49941	6.3369	3.40842	5.76428	3.38172	4.03578
SS.CHR1.940	78.237	78.4418	82.61	75.8412	93.4155	83.2444	75.0864	67.9333	73.6633	89.3716
SS.CHR1.941	2.9233	1.5721	2.4146	1.96766	1.40483	1.09341	2.25623	2.12698	2.47106	1.41885
SS.CHR1.945	3.31341	2.85467	2.45167	3.42853	2.01444	2.41838	3.15617	2.04575	3.76742	2.51483
SS.CHR1.946	0.770557	0.618857	0.439261	0.78966	0.537461	0.573046	0.47037	0.390151	0.437605	0.514649
SS.CHR1.947	1.87706	1.97049	1.44841	2.26994	2.14574	1.56596	2.24512	2.25055	1.22764	2.78624
SS.CHR1.948	3.99619	3.80292	2.01184	4.14644	2.33995	2.13757	3.62935	4.25032	1.45483	5.04317
SS.CHR1.949	52.2926	49.8306	46.7657	57.5031	54.6234	35.8828	42.2611	46.305	38.046	48.7266
SS.CHR1.943	86.4028	82.6079	100.902	90.2133	88.7762	88.1982	96.0593	134.294	67.6177	89.0606
SS.CHR1.950	17.5674	18.6592	19.0747	23.0504	23.1051	19.7417	19.691	25.4421	15.8792	20.6232
SS.CHR1.953	0	0	0	0	0	0	0.043148	0	0	0
SS.CHR1.952	51.8286	48.9554	48.9556	34.4329	54.6736	42.9253	50.2262	37.4598	48.432	40.4375
SS.CHR1.955	0.360801	0.253699	0.407358	0.28706	0.138997	0.305932	1.51415	0.761048	0.365815	0.135763
SS.CHR1.957	1.97322	0.990945	1.44365	1.37791	1.2907	0.974128	0.758854	1.91138	1.4875	1.58194
SS.CHR1.956	0	0.013381	0	0.019298	0.014376	0	0	0	0.03114	0.007982
SS.CHR1.958	3.33955	2.82004	1.52109	1.64673	1.31226	2.18233	1.4698	2.04529	2.32461	1.52133
SS.CHR1.959	2.71219	3.41284	4.09871	4.39954	2.78068	4.13651	3.20937	3.81607	2.74557	3.11911
SS.CHR1.960	8.88659	10.6042	11.1305	11.8991	10.2192	10.7237	11.4453	14.5653	10.5987	10.5272
SS.CHR1.966	0.893067	4.06126	3.2561	4.14707	0.502252	8.71195	0.699474	1.25475	1.69396	3.58165
XLOC_003562	0.073496	0.153979	0.155556	0	0.464214	0.204881	0.861269	0.375916	0.526532	0.020247
SS.CHR1.963	6.3296	8.50215	13.4653	8.09902	7.90756	8.48194	13.9121	12.643	10.1068	11.719
SS.CHR1.967	5.85963	6.3742	4.27265	5.83842	6.18471	5.53618	5.12573	4.87046	5.73666	6.70115
SS.CHR1.968	2.33818	1.8227	1.57133	1.59713	1.82786	2.29309	1.37426	2.65853	1.63067	1.49033
SS.CHR1.969	6.44778	6.19676	7.08865	6.56292	5.55967	5.3681	7.14692	4.95449	9.61706	5.38301
SS.CHR1.972	4.17729	3.78344	3.3271	4.01656	3.5977	2.94501	4.14597	3.81539	6.25302	3.78647
SS.CHR1.973	0	0.079414	0	0	0	0	0	0	0.061577	0
SS.CHR1.970	28.8035	42.8712	26.8504	32.6538	25.891	25.5017	40.7668	23.7083	41.2167	37.2091
SS.CHR1.971	0	0	0	1.02644	0	0	0	0	0	0
SS.CHR1.976	4.11732	7.6782	1.10792	4.0916	24.1783	2.66672	7.46419	0.797291	19.7552	5.74353
SS.CHR1.974	5.7514	3.19228	3.47549	4.01921	4.64713	4.31966	4.06328	5.02892	4.02729	3.50046
SS.CHR1.975	2.18411	2.88875	2.0637	1.66272	1.84027	2.15002	1.43813	1.77377	1.9259	0.887667
SS.CHR1.978	15.5902	13.0624	13.3009	11.5616	12.7614	13.6687	12.6024	15.1894	12.8243	13.2105
SS.CHR1.980	1.80831	0.818428	1.79175	2.37863	2.22268	2.14825	2.23585	0.894326	1.79584	3.4933
SS.CHR1.979	43.9353	46.2765	58.3186	22.8136	69.0123	57.7911	49.5311	28.9889	53.8465	75.7854
SS.CHR1.982	21.4491	19.173	22.4313	18.3504	23.9976	15.8939	6.88408	6.22885	22.9295	8.35399
SS.CHR1.983	24.8225	15.3194	19.7902	12.9294	29.2123	12.0791	5.37665	3.14576	12.117	4.18844
SS.CHR1.985	0.092013	0	0	0.053378	0	0	0.047257	0.075693	0.01573	0.117162
SS.CHR1.984	60.4233	94.4126	54.2251	62.8113	75.1136	69.6208	55.6938	63.2175	83.4434	91.7738
SS.CHR1.990	1.90198	3.03994	3.21398	3.69698	2.89801	4.28724	3.24293	2.17514	3.10445	3.0251
SS.CHR1.989	62.9524	48.8044	42.7844	67.1936	55.4109	55.1466	68.983	56.8862	47.4044	47.1408
SS.CHR1.991	0.199856	0.59847	0.504128	0.534169	0.67785	1.36187	0.783145	0.31587	0.426261	0.47028
SS.CHR1.992	6.25108	6.91921	9.83531	6.5121	7.47857	7.57788	8.65104	9.94024	4.4657	5.94391
SS.CHR1.993	10.5393	2.11303	2.91963	1.30434	5.91145	4.26	1.62456	4.66146	13.2924	2.7908
SS.CHR1.994	89.9675	87.4391	73.6574	175.062	117.061	90.6903	116.324	107.241	96.9529	90.2024
SS.CHR1.998	0.387786	0.252266	0.165694	0.180967	0.055939	0.15786	0.196623	0.13898	0.202877	0
SS.CHR1.997	27.9516	24.721	9.82856	17.3098	26.9725	24.341	23.0369	23.8035	20.9152	32.8802
SS.CHR1.999	2.22692	3.09851	2.31748	2.08318	5.13867	2.47456	2.61974	2.97521	2.29917	1.87013
SS.CHR1.995	64.3576	76.74	66.9905	98.5007	69.9624	81.2395	63.1385	63.0665	82.891	85.6824
SS.CHR1.996	0.768261	0.583022	0.601578	3.01809	0.994354	0.897658	0.742981	0.590264	6.53228	3.73102
SS.CHR1.1001	1.02892	1.18756	0.890192	0.906303	0.897311	0.88744	1.00468	0.645761	0.797456	0.610988
SS.CHR1.1000	10.1087	10.1639	9.56086	17.9919	7.21835	9.09002	19.0986	8.1692	13.5705	8.90937
SS.CHR1.1004	3.51562	1.95597	5.75733	2.29407	3.73219	2.72404	2.41995	1.94519	1.65809	2.89756
SS.CHR1.1002	17.0216	13.7339	7.87897	11.4893	14.106	9.25564	11.5597	18.1798	9.50606	16.2575
SS.CHR1.1003	3.92278	3.6961	4.69168	3.03293	3.62751	5.3494	3.29336	3.24337	2.6323	3.34083
SS.CHR1.1007	17.1799	10.2011	8.13016	45.6139	6.45777	18.9672	10.4554	35.1292	26.6334	34.7803
SS.CHR1.1006	172.826	236.114	242.941	113.351	288.625	201.806	196.086	160.041	184.363	186.96
SS.CHR1.1008	12.0002	15.8203	11.8838	8.82399	13.8847	10.4648	12.9973	12.561	10.1109	11.1277
SS.CHR1.1009	17.8538	13.4169	13.6401	10.5944	13.2011	16.3772	7.67793	15.2065	19.6972	14.4192
SS.CHR1.1012	0.054724	0.234866	0.802995	0.098756	0.634939	0.524925	0.84566	0.425076	0	0.151007
SS.CHR1.1010	1.79747	1.23908	1.38885	0.385585	0.915087	1.00969	0.97216	0.58596	1.76809	0.756706
SS.CHR1.1011	21.9664	25.8378	30.467	22.3168	23.6199	31.334	24.6774	26.4962	26.552	24.6425
SS.CHR1.1015	3.08272	7.23972	7.10587	1.85826	5.08787	9.78282	7.26856	2.2375	7.31958	7.07808
SS.CHR1.1016	1.47245	0.713009	0	0.016701	0	0	0	0	0	0
SS.CHR1.1018	0.310272	0.389211	0.166387	0.592701	0.353812	0.161298	0.331181	1.19152	0.484374	0.335975
SS.CHR1.1019	21.8131	20.3869	18.1756	20.4815	22.0241	18.705	19.0149	20.6448	24.672	17.6496
SS.CHR1.1021	8.94495	7.89772	7.15605	11.4554	7.77147	6.15088	7.80688	9.29297	8.80185	8.86828
SS.CHR1.1030	0.389456	0.351222	0.567531	0.627929	0.906345	0.395939	1.31578	0.526353	0.773082	0.499988
SS.CHR1.1031	17.9722	5.36348	13.359	19.3309	10.0813	10.454	27.9288	13.7864	8.54953	17.0992
SS.CHR1.1020	157.413	211.551	177.427	183.608	172.496	177.029	173.716	189.372	189.884	190.276
SS.CHR1.1036	0.198784	0.648691	0.303104	0.698085	0.183478	0.390547	0.331597	0.566131	0.625103	0.108361
SS.CHR1.1032	50.6917	45.8614	39.2927	40.6212	40.348	49.7656	45.339	54.2004	56.3026	47.2115
SS.CHR1.1033	28.0127	19.4824	28.6635	24.5442	22.2891	30.9027	32.25	33.3252	22.688	24.5951
SS.CHR1.1037	0.990395	0.869623	1.4481	0.769827	1.00732	0.671649	0.924013	0.50196	2.96765	1.28724
SS.CHR1.1034	9.3375	7.01003	6.93938	8.26603	7.14813	5.7092	8.23635	7.50861	7.25391	8.4785
SS.CHR1.1035	2.34289	4.22493	3.25577	3.93779	4.18242	1.94338	2.09524	2.30229	1.95603	3.72716
SS.CHR1.1038	2.92551	2.83931	4.71547	1.5456	1.41801	1.67519	2.02915	1.52241	4.17438	1.6376
SS.CHR1.1039	11.355	5.91156	8.96545	15.6023	10.3009	10.0945	7.64964	30.0742	13.435	11.3915
SS.CHR1.1042	2.77662	3.45007	2.12182	3.86007	3.54264	3.71198	1.66827	4.58123	4.3708	4.59179
SS.CHR1.1041	0.762055	0.715278	0.907704	0.323842	0	0.58594	0.459764	0.835472	0.781333	0.064655
SS.CHR1.1043	0	0	0	0	0	0	0	0	0	0
SS.CHR1.1044	0	0	0	0	0	0	0	0	0	0
XLOC_003685	0.226405	0.08096	0	0.117241	0.770416	0	0.011028	0.569889	0.057476	0.032681
XLOC_003686	0.037693	0	0	0.160181	0.057661	0	0	1.42892	0.185451	0.067307
SS.CHR1.1046	0.732524	0.919232	0.477648	0.588087	2.01218	0.36871	0.044692	1.33976	0.526098	1.08831
SS.CHR1.1045	81.7129	85.9486	86.1663	74.6992	96.3366	90.3506	74.8511	88.3271	84.4955	103.176
SS.CHR1.1047	38.2522	40.3965	22.1078	22.2025	29.6786	26.9572	24.2382	36.7638	64.977	15.6172
SS.CHR1.1048	1.03306	0.868905	1.20721	1.58118	0.261843	0.86146	1.43453	2.48155	0.427493	1.75116
SS.CHR1.1049	6.44497	6.08631	6.0299	6.43413	6.23762	6.6651	6.64086	6.57966	9.06571	5.34028
SS.CHR1.1052	0.737024	1.92476	1.23564	1.87983	0.881348	1.47048	0.957953	1.15002	0.862174	1.04017
SS.CHR1.1050	0	0	0	0	0	0	0	0	0	0
SS.CHR1.1051	0	0	0	0	0	0	0.006309	0	0	0
SS.CHR1.1053	7.89529	5.53527	5.34245	6.15046	8.61251	7.08132	5.58149	6.52805	5.54267	6.54999
SS.CHR1.1054	6.9373	4.54173	5.62648	5.0714	6.55105	6.69268	5.31083	7.44122	6.29419	6.78298
SS.CHR1.1055	4.05481	1.29027	4.74244	1.28699	3.45822	2.66915	1.07428	3.64311	0.764447	1.29559
SS.CHR1.1056	0.52318	0.071232	0.341177	0.712744	0.295944	0.338114	0.057892	0.176697	0.158177	0.038018
SS.CHR1.1057	34.3263	22.9386	30.0529	23.9391	29.6769	27.1844	20.0452	24.4198	21.0493	32.5358
SS.CHR1.1060	4.57764	6.43591	5.48529	6.85865	2.69342	6.23148	5.14697	5.28289	6.0103	5.31825
SS.CHR1.1058	13.1478	9.22369	8.99055	7.62005	9.78943	9.28948	10.2688	10.2254	10.9011	10.0379
SS.CHR1.1062	3.80133	3.41041	3.25714	4.58055	5.27266	4.1309	4.6952	3.17703	6.13048	3.65089
SS.CHR1.1061	31.9402	25.0058	44.3146	14.7702	43.4219	29.2914	28.3925	20.9216	31.5221	61.1987
SS.CHR1.1063	17.7967	16.2691	13.7079	22.9526	12.3303	26.4124	13.8002	23.9123	19.4473	33.5794
SS.CHR1.1064	0.811835	0.386772	0.437248	0.415902	0.76981	0.289852	0.510505	1.02474	0.639177	1.01851
SS.CHR1.1065	6.69943	5.471	5.32815	4.43735	7.84443	2.95202	7.29042	8.07097	6.17166	8.92635
SS.CHR1.1068	0.028567	0.027562	0	0	0	0.067807	0.01498	0	0.052048	0
SS.CHR1.1066	28.1234	28.5745	32.3083	24.8475	24.2818	28.1212	24.5206	33.3649	22.1836	32.3358
SS.CHR1.1069	4.63222	12.305	9.50913	6.18746	4.73064	10.1915	10.691	9.19468	12.8234	11.8477
SS.CHR1.1071	9.51099	5.34356	3.63362	18.5696	3.73035	4.76809	4.50812	21.3404	10.3368	24.7134
SS.CHR1.1077	3.21677	2.88274	3.61868	2.68902	2.46317	3.49047	4.25479	3.05665	2.4163	2.67018
SS.CHR1.1078	7.26814	6.66531	6.42312	7.71417	6.74769	7.88458	7.8413	7.18708	8.41687	8.18995
SS.CHR1.1080	38.3747	42.0069	34.7158	38.754	31.4625	36.1649	34.5893	36.015	44.5163	42.6997
SS.CHR1.1081	81.1989	102.103	120.882	129.891	129.334	98.1087	98.683	80.0825	140.67	115.544
SS.CHR1.1082	14.7678	14.9408	13.3546	14.2128	18.0374	15.7001	14.8855	13.593	17.7382	14.6841
SS.CHR1.1083	17.9334	23.2701	19.7622	17.4385	25.6069	30.0175	22.3438	19.9238	18.736	23.8683
SS.CHR1.1086	3.90268	1.16153	1.28288	0.397106	0.255786	3.08879	0.558493	1.03587	1.42618	1.22562
SS.CHR1.1084	18.4435	23.7403	18.1898	22.5583	16.9646	20.5383	22.8182	19.1114	20.6611	21.9989
SS.CHR1.1087	6.37875	7.68349	6.31842	5.64495	7.6812	4.05675	6.31903	5.97369	3.28788	6.43451
SS.CHR1.1088	4.07208	3.2717	3.74814	3.94335	3.66881	4.4548	3.02124	3.56322	2.19691	3.81411
SS.CHR1.1089	4.11057	4.45877	5.25425	5.67699	4.70175	4.56022	5.48185	4.42126	2.1215	3.15064
SS.CHR1.1091	5.15826	0.784893	2.45255	0.62656	3.0936	1.17469	0.791245	0	0.256193	0.243491
SS.CHR1.1092	0	0.020921	0	0	0	0	0.046517	0.013088	0	0
SS.CHR1.1090	33.4392	25.5569	29.9462	28.2908	28.26	32.6144	23.0098	19.8116	21.5924	27.1883
SS.CHR1.1094	1.59681	1.93971	4.67186	2.56097	2.27989	0	4.15634	5.23545	1.29765	1.46383
SS.CHR1.1095	1.28023	1.17586	2.95449	1.72203	1.58276	0.357852	3.15	4.56311	0.894314	1.63735
SS.CHR1.1098	2.63378	1.5094	2.84551	2.54577	2.15234	2.27811	1.96588	4.13134	2.59815	2.92529
XLOC_001499	14.9062	13.1491	13.4715	13.3162	11.2721	10.3666	12.4553	15.6886	12.4902	13.7655
SS.CHR1.1099	3.07504	3.50345	0	1.61664	0	2.23597	2.69876	0	1.52287	1.05411
XLOC_001503	5.47533	4.75682	6.59475	5.70664	5.5665	4.855	3.16737	7.34448	4.30895	3.9174
XLOC_001507	6.04899	3.86926	5.85908	6.94936	7.07867	8.27264	7.02992	7.01177	8.3101	4.96989
SS.CHR1.1101	9.61674	7.74631	8.8377	9.11696	7.20108	7.95448	7.71032	8.00433	10.1867	8.91105
SS.CHR1.1103	0.268328	0.052857	0.172166	0.055902	0.222609	0.36302	0.225414	0.095324	0	0.054106
SS.CHR1.1102	3.12741	3.6725	2.84628	1.73143	2.38922	2.19468	3.34281	3.96847	3.41635	2.25694
SS.CHR1.1104	6.08242	8.3522	7.36932	7.96064	6.98041	7.52856	8.21567	7.65331	4.9878	6.68403
SS.CHR1.1110	0.58511	2.85819	13.0931	4.48682	0.059785	11.3343	2.64091	0.479291	3.06042	4.36174
SS.CHR1.1109	0.29494	0.127447	0.279657	0.23426	0.021876	0.142279	0.183076	0.554803	0.230994	0.248081
SS.CHR1.1106	5.4815	5.44759	4.71459	9.4658	4.93691	5.77047	5.38474	4.70559	4.59969	4.87291
SS.CHR1.1107	2.66374	1.88863	1.60328	2.3026	1.84269	1.6015	1.70462	1.79329	1.35261	1.6702
SS.CHR1.1112	0.085142	0	0.293789	0	0	0	0	0	0	0
SS.CHR1.1111	24.0462	29.9909	35.3952	30.3524	17.186	36.1125	25.419	32.1313	47.5704	25.6766
SS.CHR1.1113	11.4488	6.95521	10.2968	5.77688	5.108	3.30395	7.69966	13.5527	4.65112	7.03869
SS.CHR1.1114	0.970351	6.30993	7.59139	7.32944	5.48527	8.95584	6.06749	9.52294	9.85527	9.6152
SS.CHR1.1117	47.8882	48.5511	33.7286	38.8575	24.5329	32.7313	31.537	52.1525	45.5852	41.9393
SS.CHR1.1119	1.1537	1.06879	0.974208	0.775623	1.55079	1.20612	1.36449	1.23118	1.14777	1.05289
SS.CHR1.1120	6.20607	7.53568	5.91686	5.39236	9.92633	6.24981	5.65129	7.27062	4.82558	7.81886
SS.CHR1.1118	69.361	58.6023	60.4662	60.7905	55.0392	59.9808	62.8638	74.2397	56.649	66.1977
SS.CHR1.1124	3.06367	2.60414	2.63973	2.39874	1.83932	2.92298	1.94081	1.56795	0.835965	0.625776
SS.CHR1.1125	1.59158	0.391281	0.542466	0.549279	0.894696	0.362463	0.101315	0.517757	0.374765	0.139678
SS.CHR1.1126	0	0.03863	0	0.085305	0.21758	0.206461	0	0.247314	0.278198	0
SS.CHR1.1122	55.6485	51.4472	51.3662	42.3271	54.2193	47.543	54.8608	49.9869	34.7771	47.2052
SS.CHR1.1121	0	0	0	0	0	0	0	0.353182	0	0
SS.CHR1.1123	57.1777	37.6587	47.2183	40.3671	47.5132	52.7418	44.6958	42.2202	31.5151	42.025
SS.CHR1.1134	0.509619	0.676033	1.43452	0.766125	0.299767	0.392913	1.05556	0.718261	1.71152	1.59736
SS.CHR1.1128	8.60055	2.23605	6.75512	3.30076	9.39062	5.49031	6.60273	4.13617	1.57428	4.88892
SS.CHR1.1129	0.277754	2.38017	0.040211	1.75387	0.148907	0.422078	0.15905	2.61244	3.72448	0.382441
SS.CHR1.1137	0.633247	0.976796	0.34816	0.399746	1.11594	0.325392	0.755826	0.625978	0.66093	0.38418
SS.CHR1.1136	5.29714	4.81582	5.02502	3.9222	5.08108	4.6642	4.4731	5.35894	5.50502	4.65659
SS.CHR1.1138	0.555083	0.244835	0.435968	0.327097	0.398064	0.682807	0.711503	0.515795	0.690837	0.611779
SS.CHR1.1139	6.80979	4.84852	6.13084	4.23207	4.43223	6.06509	4.27726	4.32541	3.75757	6.75985
SS.CHR1.1135	62.5073	54.7193	73.5862	55.775	74.2473	60.091	65.0803	63.6389	61.4573	72.2172
SS.CHR1.1140	14.4711	9.05648	15.5272	12.6241	11.6985	18.1933	15.3143	11.0551	8.14377	12.4161
SS.CHR1.1141	4.66141	5.63211	4.45594	4.47607	5.77502	3.60504	4.65955	6.09343	5.25383	4.77879
SS.CHR1.1142	8.84381	11.82	10.367	8.11013	14.8889	8.91506	6.96919	13.779	20.8304	7.07347
SS.CHR1.1143	39.7381	45.5456	30.459	42.7899	37.1376	40.8216	42.3186	39.0937	33.35	39.0051
SS.CHR1.1145	0	0.283052	0.079004	0	0.072392	0	0.133019	0	0.139838	0.181118
SS.CHR1.1144	21.6018	7.40084	12.373	10.317	11.342	17.1318	9.3879	12.2239	10.496	12.9087
SS.CHR1.1148	0.051103	0	0	0	0	0	0.143893	0.037797	0.16929	0.076493
SS.CHR1.1147	38.5546	43.2774	41.3554	31.5897	34.9574	35.0531	35.9274	40.0486	25.3013	49.2763
SS.CHR1.1150	21.8199	20.4787	21.0412	22.6954	21.3325	24.4377	23.7008	25.3093	20.6034	22.4463
SS.CHR1.1157	0.577798	0	0	0	0	0	0.140177	0	0	0
SS.CHR1.1158	1.76789	7.47089	4.94974	8.26576	4.79389	11.6472	1.58319	5.93546	4.56169	11.8412
SS.CHR1.1159	20.161	17.2795	3.6732	3.14745	8.23814	1.69684	5.90746	4.3886	8.27992	4.26364
SS.CHR1.1151	46.2234	41.3795	41.114	27.3507	30.0027	42.0728	42.0429	44.4606	28.3232	34.5653
SS.CHR1.1152	0	0	0	0	0	0	0.090609	0	0	0
SS.CHR1.1154	23.6135	21.8365	17.2047	19.847	25.5015	19.3029	15.9427	27.6864	17.4612	18.5733
XLOC_003838	0.625063	0.587032	0.480882	0.040197	0.264878	0.385709	0.309853	0.088847	0.211852	0.090533
SS.CHR1.1161	26.4077	31.0775	29.2667	21.9558	21.8809	33.4522	27.3124	29.0645	17.852	30.6314
SS.CHR1.1162	17.3163	11.8341	12.0578	14.0503	11.5043	13.3469	10.1922	14.4319	7.49518	11.0572
SS.CHR1.1164	12.5135	17.1709	16.3177	16.1793	14.0246	17.6264	10.1657	15.6707	18.3329	16.9774
SS.CHR1.1166	0.144733	0	0	0	0	0	0	0	0	0
SS.CHR1.1167	0.774912	0.064304	1.51284	0.31233	0.934926	0.520987	0.536052	0.490087	0.565461	0.320825
SS.CHR1.1165	21.8259	21.0358	21.9498	22.0674	14.7899	16.9089	14.7862	18.444	12.0028	20.6091
SS.CHR1.1168	78.3856	47.5708	45.2782	51.3899	69.501	70.6563	59.1363	55.215	43.1571	64.0824
SS.CHR1.1169	26.3447	9.19129	14.3887	7.00341	2.8228	13.9257	8.4467	4.61198	10.7264	3.27635
SS.CHR1.1170	0.102486	0	0	3.35176	0.375957	0.048388	0.255218	0.064658	0	0.128539
SS.CHR1.1173	0.482162	0.542006	1.39793	0.68766	0.857119	0.524259	0.488308	0.580236	0.527967	0.348928
SS.CHR1.1174	0.121937	0.345212	0.160231	0.411108	0.160139	0.314935	0.128121	0.535496	0.269633	0.093213
XLOC_003854	16.8487	9.76514	8.93998	3.12045	12.6147	21.9771	6.70542	6.1152	4.76624	5.56057
SS.CHR1.1175	97.1966	90.5116	111.415	137.848	80.4518	71.4314	102.004	59.456	162.007	80.032
XLOC_001597	0.031063	0	0	0.458843	0	0	0	0.089609	0	0
SS.CHR1.1177	201.069	101.548	256.032	233.523	138.864	111.596	136.368	117.507	150.013	177.896
SS.CHR1.1178	73.9247	91.8073	119.484	108.732	93.3628	92.8286	90.8446	97.1323	116.974	106.886
SS.CHR1.1179	0.043322	0.016392	0.035318	0	0	0	0.056504	0.010164	0	0
SS.CHR1.1180	42.9338	39.72	48.5692	24.0628	40.1639	32.3311	53.9942	27.1903	28.5872	39.537
SS.CHR1.1181	2.01272	2.68364	2.03295	1.61129	1.45227	1.80463	1.72224	1.85277	1.95892	1.63571
SS.CHR1.1182	3.04892	2.44599	3.13752	2.28393	3.21292	2.93914	2.16745	3.59476	3.30894	2.7709
XLOC_001606	8.4352	9.64689	6.7949	6.75997	10.7873	12.9635	11.0894	7.18253	8.21623	5.43804
SS.CHR1.1183	7.84464	11.9256	6.49833	4.48414	7.57866	6.97809	5.15354	7.63056	7.01719	3.80409
SS.CHR1.1191	0.20157	1.03726	0.353626	0.819725	1.5759	0.650893	1.09574	0.238632	0.947356	2.41434
SS.CHR1.1187	6.84715	3.38636	3.88683	3.95352	4.76656	4.81062	3.74218	3.65275	16.9123	3.76806
SS.CHR1.1184	1.45326	2.71688	2.36814	0.512637	1.02237	2.95018	0.807142	2.01514	1.22261	1.0193
SS.CHR1.1185	0	6.23853	0.475269	0	0	0.019045	0.024484	3.08123	1.37805	0.016013
SS.CHR1.1186	10.4054	7.4144	7.02484	8.09955	8.63495	7.3556	10.3815	5.28685	9.36052	9.06576
SS.CHR1.1188	7.88149	3.13977	3.34853	4.63876	7.06345	2.94802	2.95785	3.8935	4.27338	3.96584
SS.CHR1.1189	18.3601	7.52922	13.7986	0.653955	0.781078	1.71849	0.657586	0.329313	10.0387	0.492174
SS.CHR1.1200	0	0.307058	0.217779	0	0.342817	0	0.459423	0.199226	0.784974	4.68212
SS.CHR1.1202	1.3713	1.92558	1.48221	1.22801	1.65551	0.713857	0.41919	1.235	1.19107	0.985516
SS.CHR1.1201	5.56939	7.65542	5.81561	7.737	7.27857	6.03346	6.68969	7.89479	5.1879	8.13023
SS.CHR1.1194	4.60011	2.71763	1.827	0.768094	3.63814	3.60099	3.25685	2.56959	1.39274	1.8124
SS.CHR1.1195	25.4016	21.8588	21.9921	17.4593	23.1243	23.9981	24.6368	19.7618	19.0072	19.2387
SS.CHR1.1196	0.202277	0.155047	0.176056	0.250426	0.189158	0.484431	0.270516	1.0084	0.43	0.214761
SS.CHR1.1197	5.18181	4.85708	6.95419	5.4611	6.85702	5.32397	6.43364	7.00178	6.61193	5.94753
SS.CHR1.1198	4.9534	5.73019	5.59852	4.60919	6.24385	5.9188	6.53181	4.94787	5.58629	7.75195
SS.CHR1.1204	6.07812	10.5878	7.16638	8.16423	3.39469	3.53631	15.965	2.21446	2.98539	6.5679
SS.CHR1.1205	16.4405	24.7376	16.7706	16.1319	18.2419	16.3765	12.5946	12.3807	27.4947	12.4409
SS.CHR1.1208	0.109622	0.228651	0.106166	0.30069	0.18253	0.168756	0.31367	0	1.4816	0.746033
SS.CHR1.1209	1.48919	1.89492	1.90988	0.794315	1.39445	0.987663	4.16153	0.109532	2.5176	0.906569
SS.CHR1.1206	11.4747	15.712	10.3002	9.01337	11.7346	7.84606	9.63357	8.36437	24.1317	15.2722
SS.CHR1.1207	85.2988	89.8277	105.312	100.15	80.5077	103.528	113.048	76.0089	117.568	100.216
SS.CHR1.1210	33.6586	98.3116	23.0796	31.072	45.9292	51.8572	57.196	58.5051	86.8268	127.529
SS.CHR1.1212	0.018421	0	0	0	0	0.01543	0.00868	0	0.05946	0
SS.CHR1.1213	16.1509	24.3053	13.5401	17.5867	10.994	6.93151	12.1109	15.1481	23.7632	7.31754
SS.CHR1.1214	38.0173	52.8868	51.1956	65.824	44.9268	44.629	40.2137	45.7885	56.8101	59.6238
SS.CHR1.1219	1.01285	0	0.326442	0	0	0	0.06677	0.028673	0.292943	0
SS.CHR1.1218	0.412931	0	0.048456	0	0	0	0.053542	0.039358	0.174737	0
SS.CHR1.1216	1.44447	1.01965	0.701459	0.432594	0.322922	0.604974	0.243996	0.329602	0.302129	0.471738
SS.CHR1.1215	64.6006	54.9738	80.4444	71.185	71.6406	74.1091	79.0838	66.7438	58.5585	79.9935
SS.CHR1.1221	7.58964	12.6415	12.0123	8.42969	7.7573	8.51302	9.01645	12.0235	8.9614	9.78874
SS.CHR1.1220	18.0879	13.3315	20.2288	17.9358	17.1314	17.8972	27.1002	36.887	19.8741	16.1246
SS.CHR1.1223	25.2731	27.3947	19.6273	27.106	26.0625	30.0136	29.88	34.5197	28.9418	35.3165
SS.CHR1.1224	7.98566	5.00746	9.78426	6.02208	7.75321	10.1217	10.1641	7.14345	4.88148	8.36516
SS.CHR1.1225	9.74747	6.95758	8.07564	10.7359	8.14912	7.7532	8.12915	9.91252	10.7426	7.85578
SS.CHR1.1230	0	0.283404	0	0	0	0.299455	0	0	0	0
SS.CHR1.1234	0.243019	0	0	0	0	0	0	0.031217	0	0
SS.CHR1.1231	0.045593	0	0.275416	0	0.19496	0	0.132743	0	0.107094	0.083506
SS.CHR1.1232	0	0	0	0	0	0	0	0	0	0
SS.CHR1.1233	0.541885	0.442129	1.11337	0.414136	0	0.127147	0.332527	0.136472	0.617661	0.102072
SS.CHR1.1235	4.35393	4.25176	3.41864	5.30299	3.30781	4.51176	3.32615	3.52508	4.47851	4.87112
SS.CHR1.1236	1.1059	0.860883	2.49316	1.75843	1.04694	1.41635	0.886925	1.39918	1.06289	0.968305
SS.CHR1.1227	3.12876	4.55954	3.41478	0.437209	0.190863	21.8582	1.5318	2.65658	0.556998	1.5673
SS.CHR1.1228	12.9581	7.67515	6.62714	3.9266	3.62301	4.94586	2.6794	7.99153	11.9593	3.37028
SS.CHR1.1239	0.031034	0	0	0	0	0.259592	0.056147	0	0.085018	0.038846
SS.CHR1.1238	1.76013	0.572939	1.71786	1.01674	1.18323	1.45239	1.02979	1.66766	1.46326	0.552937
SS.CHR1.1237	1.70962	2.11991	2.63662	2.78956	3.56312	4.42538	2.97575	3.81539	2.27751	1.64497
SS.CHR1.1241	0.32089	0.142973	0.20183	0.09231	0.745367	0.705878	0.406984	1.30706	0.19152	0.298101
SS.CHR1.1240	7.00855	8.78289	6.09709	8.97971	5.63161	5.02618	4.2717	8.26622	12.935	8.18913
SS.CHR1.1242	17.0972	18.1624	15.1596	19.0882	17.9235	14.8889	14.3979	17.5639	17.0993	17.7749
SS.CHR1.1243	10.3501	13.7957	16.5421	16.3436	22.0219	16.0202	19.4772	16.5334	13.7087	16.0511
SS.CHR1.1244	3.08087	1.18538	0.729118	1.64847	1.9926	0.954762	1.08416	1.31097	1.04855	1.36197
SS.CHR1.1245	7.58874	9.33674	16.6144	10.8234	7.20231	10.6219	14.0999	10.7447	19.3475	7.56394
SS.CHR1.1246	8.78785	5.60948	8.48652	7.14146	4.88668	9.62694	4.66708	8.80499	5.68577	10.5365
SS.CHR1.1247	5.49336	7.82281	6.69739	2.77662	1.82031	7.72457	4.32024	9.98292	6.57714	11.1037
XLOC_001692	0.014134	0.072895	0	0	0.53216	0	0.039618	0	0	0.925556
SS.CHR1.1251	6.16692	0	0	4.66405	4.54245	0.083823	13.3786	2.17935	0.2756	0
SS.CHR1.1256	12.1503	8.74558	9.79534	7.96163	9.80476	7.8069	9.13425	12.005	6.94992	7.01081
SS.CHR1.1257	3.80669	3.25362	3.77767	3.64433	3.06429	3.49573	3.41355	4.01163	3.47682	3.43341
SS.CHR1.1261	0.707373	2.57217	5.1246	11.4146	0.177274	1.48266	1.71372	0.423489	2.02351	8.40503
XLOC_003978	6.08189	4.51265	19.7378	9.10025	1.15511	11.193	1.99873	7.41663	6.44445	14.9975
SS.CHR1.1259	0	0.152278	0	0	0	0.092505	0.164217	0.034492	0.165056	0
SS.CHR1.1262	18.8577	12.1516	16.1398	16.5683	20.5093	13.7205	20.1719	17.7478	14.7835	19.9003
SS.CHR1.1263	4.91706	3.71053	6.56103	4.27187	4.18527	7.82037	3.90553	4.35412	6.51598	6.3699
SS.CHR1.1264	7.78513	5.99566	2.00281	3.70983	1.63794	10.2091	1.75895	7.89965	5.35792	5.7436
SS.CHR1.1266	0.2961	4.71196	0.034543	0	0	0.191367	0.112802	0	1.14289	0.227166
SS.CHR1.1265	27.7732	16.7772	15.9337	4.50658	1.79884	17.2429	2.38958	7.00246	54.9276	1.71466
SS.CHR1.1269	8.69582	7.51077	5.03526	9.68931	6.60306	8.72941	5.80242	9.04451	7.87877	8.55567
SS.CHR1.1267	0	0	0	0	0	0	0	0	0.252841	0
SS.CHR1.1274	3.89462	2.76384	3.33262	3.49052	2.88123	3.61047	3.25833	3.03905	4.79746	3.13855
SS.CHR1.1277	0	0	0	0	0	0	0	0	0	0
SS.CHR1.1278	55.9233	51.267	51.9792	57.3644	47.0503	49.2546	52.0346	51.4495	52.5468	60.6313
SS.CHR1.1279	5.375	5.65791	2.872	4.79793	5.79968	3.26519	5.21663	5.32779	3.85294	4.14777
SS.CHR1.1282	0.517421	1.10804	0.274368	1.29733	0.304618	0.35653	0.239148	0.957499	7.79263	1.11975
SS.CHR1.1283	0.914959	1.62446	1.33685	0.981386	1.1981	0.560993	0.416008	0.256962	0.796083	0.998708
SS.CHR1.1281	12.5754	14.083	13.5922	18.002	13.0132	11.1414	14.0105	13.1117	13.0218	12.9492
SS.CHR1.1284	15.2951	14.0266	13.0176	18.2535	13.8283	16.0843	13.2716	17.2695	24.4091	15.2853
SS.CHR1.1285	4.35827	3.13773	2.6627	3.1181	3.30427	2.8319	4.48555	4.45024	3.44301	2.93824
SS.CHR1.1286	1.10621	1.87647	2.77737	0.527729	1.36668	1.09326	1.24289	1.75321	2.54387	1.05655
SS.CHR1.1288	11.8386	6.92779	9.81776	9.7775	5.64074	8.84134	8.82001	5.08518	7.78313	9.82771
SS.CHR1.1291	0.504434	0.319214	0.267063	0	1.04973	0.056936	0.173491	0	0.188879	0.222506
SS.CHR1.1292	0.536088	0.12721	0.266665	0.170049	0.409068	0.255167	0.378578	0.297371	0.257202	0.042743
SS.CHR1.1289	2.26345	1.39022	3.15213	1.76958	1.64071	1.98271	0.845046	1.34498	3.45195	1.79867
SS.CHR1.1287	334.317	495.612	407.718	575.942	229.568	323.543	303.521	295.465	527.624	342.604
SS.CHR1.1293	13.9988	15.0537	14.6084	11.9782	10.1496	14.8521	10.5807	14.584	18.0192	12.9919
SS.CHR1.1295	32.7551	26.4241	27.4468	24.8851	25.0517	30.4084	24.6335	31.0168	35.6718	26.2822
SS.CHR1.1296	9.92119	6.4895	9.75279	9.54086	11.1562	10.2967	7.75504	10.4892	9.80237	11.8604
SS.CHR1.1297	2.19806	1.35044	3.33361	2.47894	1.42888	2.88155	1.64973	0.62466	3.06602	2.03714
SS.CHR1.1299	1.89057	3.223	2.19908	1.63343	2.26521	1.46986	2.31784	0.7525	1.93903	2.08053
SS.CHR1.1298	32.9999	47.6685	47.7613	46.938	35.8714	73.7784	43.8586	40.6279	42.2547	45.8213
SS.CHR1.1301	1.03747	2.27288	0.745348	1.45345	1.95199	0.361278	0.90168	1.14533	0	1.72727
SS.CHR1.1300	64.4282	73.4825	62.757	183.338	97.4146	63.0159	90.5632	64.3509	57.522	129.813
SS.CHR1.1302	0.042285	0	0	0.047607	0	0	0.028191	0.036433	0.013238	0.120592
SS.CHR1.1303	346.169	327.899	559.234	237.701	428.057	165.325	385.99	379.666	314.045	407.04
SS.CHR1.1304	88.7184	71.4392	115.308	74.2299	107.268	95.2564	105.099	69.5151	104.086	91.9659
SS.CHR1.1305	25.5445	52.2531	27.2127	23.0984	34.2494	26.2852	23.0833	23.7306	32.4991	34.2641
SS.CHR1.1306	0.421823	0.848798	0.42978	0.372889	0.484136	0.568706	0.693464	0.661721	0.567254	0.803758
SS.CHR1.1307	2.04565	0.669025	1.04856	1.20139	1.44059	0.15206	0.955101	1.45154	1.22241	2.03349
SS.CHR1.1308	13.9986	10.5676	13.6753	16.3753	9.77437	14.5961	14.9658	18.2782	19.0036	17.6027
SS.CHR1.1309	2.59972	1.56771	1.09322	1.4465	2.48726	2.03352	1.68863	1.8736	2.60326	1.10325
SS.CHR1.1310	19.5887	16.5155	21.1583	21.6249	14.8191	17.1334	15.3886	15.8831	21.3385	15.9066
SS.CHR1.1311	326.852	362.084	131.552	312.588	292.664	314.514	288.443	188.55	322.497	233.575
SS.CHR1.1312	71.5503	71.7832	64.1164	93.9844	51.1187	51.7569	81.5427	31.6291	84.5574	65.0167
SS.CHR1.1318	0.277067	0.455614	0.249776	0.118743	0.118255	0.046036	0.121558	0	0.188608	0.137144
SS.CHR1.1317	9.82296	7.70626	9.75598	10.07	9.86749	10.7635	13.6033	11.9468	9.61537	11.1631
SS.CHR1.1321	3.51686	0.351187	1.8239	0.078649	0	0.707363	5.16096	1.41649	13.2248	2.12785
SS.CHR1.1322	2.34788	0.488945	0.943106	0.276119	0.044057	1.12083	1.15374	0.072397	0.367575	0.229338
XLOC_004066	13.4901	15.675	16.913	17.5995	8.45854	18.0853	11.0952	9.96652	10.2716	8.77271
SS.CHR1.1313	0	0.030148	0	0	0	0.131527	0	0	0	0
SS.CHR1.1315	6.64289	4.50102	3.97776	3.50099	2.08317	6.5512	3.42929	1.79439	7.96094	4.00785
SS.CHR1.1316	30.5837	25.8088	37.0665	23.4722	14.7752	33.2161	23.326	29.7613	30.9919	25.9672
SS.CHR1.1323	21.66	31.0113	27.7584	22.6901	40.8198	20.0506	33.5154	20.4144	34.914	47.8224
SS.CHR1.1325	0	0	0	0	0.019434	0	0.104521	0	0	0
SS.CHR1.1326	1.95472	2.04256	2.56942	2.12681	1.7066	2.07357	2.42808	2.54302	1.58827	2.61644
SS.CHR1.1329	0.272267	0	0	0	0	0	0	0	0	0
SS.CHR1.1328	2.5423	2.20427	1.60908	2.76952	5.82691	1.09472	5.88101	4.04402	4.43526	1.4342
SS.CHR1.1330	4.43521	2.7727	1.6557	3.57973	1.66926	1.59002	1.03517	5.0909	1.9794	1.83379
SS.CHR1.1327	35.6004	31.7023	33.2466	32.9415	34.0621	36.239	31.5627	34.928	35.762	33.3732
SS.CHR1.1332	30.0724	66.7139	42.9127	39.8041	37.3301	51.509	43.8741	43.716	37.2942	50.5265
SS.CHR1.1334	0.434659	0.213391	0.37023	0.48385	0	0.350699	0	0	0.064681	0
SS.CHR1.1333	5.11906	7.26923	4.73399	5.84087	6.57095	6.92613	6.62985	4.77119	7.60466	4.89586
SS.CHR1.1336	0.646916	0.873106	0.843759	0.747381	0.17739	0.647078	0.626481	1.60512	0.576615	0.635398
SS.CHR1.1335	17.4556	22.0987	21.8531	24.3037	21.1072	22.4203	28.7614	23.9359	18.4475	32.7071
SS.CHR1.1337	1.33968	0.391112	1.02365	1.03585	0.815537	0.469144	0.806911	0.879734	1.18839	0.430589
SS.CHR1.1338	20.1759	11.6515	10.8895	13.9509	12.1145	10.8532	12.479	15.3785	20.7891	8.72889
SS.CHR1.1341	6.63562	7.51211	4.59438	4.58863	6.54796	8.25928	5.15153	11.2816	12.727	2.45878
SS.CHR1.1340	5.76335	4.29617	5.30345	4.84699	3.97771	4.12927	3.95581	5.02475	5.33242	5.46856
SS.CHR1.1342	15.5031	7.02633	11.0248	6.68942	11.9062	10.1956	11.2535	14.6384	12.3419	7.70777
SS.CHR1.1344	13.5983	13.6901	14.8241	13.8273	12.1681	13.4186	14.0221	14.7969	13.3129	14.2952
SS.CHR1.1345	86.9403	76.8451	25.0316	139.049	63.8441	20.6304	31.1746	96.9333	107.741	53.0958
SS.CHR1.1347	13.0664	13.094	11.2218	17.9319	16.1798	13.7058	8.6422	10.9247	20.4116	16.8588
SS.CHR1.1346	40.7323	41.3991	22.1031	30.4407	45.0036	23.0373	34.7702	35.0285	22.7733	44.0574
SS.CHR1.1349	18.8556	18.0754	18.3536	20.9317	18.7522	19.7398	19.5993	21.5411	19.5202	17.8654
SS.CHR1.1351	0.346018	0.52935	0.08298	0.363544	0.104334	0.235087	0.151859	0.386455	0.35236	2.38666
SS.CHR1.1352	1.41942	2.60773	0.774614	3.19132	3.91275	0.210712	0.936861	4.25054	1.1487	3.83133
SS.CHR1.1350	5.83495	3.79041	4.7381	5.0619	5.79033	4.38558	4.31201	4.55786	5.47204	5.5009
SS.CHR1.1353	29.2605	35.824	19.8847	6.44431	27.1986	20.0867	28.7811	113.604	22.6526	70.0416
SS.CHR1.1354	6.70629	6.88805	5.02386	4.98918	6.49555	4.75242	4.39879	5.09389	5.66912	5.11926
SS.CHR1.1355	12.386	19.7434	22.5927	8.34408	14.6942	29.7987	16.5602	27.4845	6.13195	15.8161
SS.CHR1.1358	0.216127	0.466223	0.057609	0.190783	0.248178	0.3637	0.131202	0.259925	0.115414	0.144423
SS.CHR1.1357	2.73918	4.51064	3.47942	2.54905	2.54415	5.67999	4.84817	2.21602	4.36241	4.21444
SS.CHR1.1356	16.1884	19.4904	17.4768	19.4355	19.8353	18.692	16.491	20.2912	18.6008	17.0736
SS.CHR1.1359	67.9613	38.6929	63.7036	40.864	72.6622	76.8315	49.419	51.4408	47.2464	28.7159
SS.CHR1.1361	1.30184	0	0	0	0	1.05218	0.346329	0	0	0
SS.CHR1.1360	24.3409	23.3901	30.4343	35.6683	17.4918	24.4205	22.3607	25.1637	30.1187	28.782
SS.CHR1.1363	0.133656	0	0	0	0	0	0	0	0	0
SS.CHR1.1362	3.55233	0	0	0	0	0	0	0	0	0
SS.CHR1.1364	15.5767	0	0.351702	1.7092	0.104017	1.90549	0.65215	0	0	1.06446
SS.CHR1.1365	4.49377	5.01065	4.92781	5.21573	5.24313	5.82632	4.89825	5.3356	6.93946	4.27335
SS.CHR1.1366	1.66782	2.5487	1.14754	1.26444	1.65317	2.87831	1.923	1.43523	1.7017	2.08786
SS.CHR1.1368	0.273284	0.124788	0	0	0.155022	0.072089	0.161988	0.100016	0.169216	0.042183
SS.CHR1.1367	6.78191	13.4051	7.98551	11.4038	11.0108	10.0848	11.8874	12.374	8.3276	11.4668
SS.CHR1.1369	3.01127	1.06507	0.387413	0.367304	2.10812	1.94677	5.14182	4.18746	0.38252	1.60096
SS.CHR1.1370	15.3269	10.4779	17.1167	4.49311	11.5542	12.2751	5.98353	17.8043	4.63954	8.48166
SS.CHR1.1371	5.47432	20.6066	12.3326	8.65844	2.50786	10.2122	5.02233	18.0382	6.82216	15.6502
SS.CHR1.1372	0.240063	0	0	0.194955	0.120889	0	0	0.291944	1.0579	0
SS.CHR1.1373	23.6053	26.4424	19.2077	22.8561	7.6045	60.078	22.1647	14.3006	27.9298	4.7418
SS.CHR1.1374	4.08024	2.19179	2.48489	1.39487	1.41775	2.60519	0.43205	0.886912	3.36733	1.58347
SS.CHR1.1375	22.8016	26.8757	23.2012	24.6706	19.9574	25.1864	18.887	20.5639	25.2181	33.1678
SS.CHR1.1376	6.15309	5.91601	5.76074	3.64931	9.9612	9.19789	7.84344	6.11802	7.34493	3.9896
SS.CHR1.1377	2.48352	1.67328	1.08617	0.94883	0.886401	0.780405	0.80162	1.55323	1.29491	1.00924
SS.CHR1.1388	3.26374	18.2508	27.3781	28.7243	13.4779	18.8299	9.42016	4.99428	20.9824	17.0668
XLOC_001838	3.26824	1.70731	1.3358	0.302915	2.18695	3.44047	0.44002	1.85801	2.85477	0.15597
SS.CHR1.1384	1.5573	2.76214	8.52039	0	1.89133	1.37748	2.63743	0.340768	1.20119	3.15118
SS.CHR1.1387	18.3299	21.8636	17.9234	0.017046	7.95224	12.5061	19.8018	3.37911	1.6001	22.4598
SS.CHR1.1390	0.842258	1.42727	1.70954	1.00486	0.768853	1.5118	0	0.603908	1.00496	1.91313
SS.CHR1.1391	8.21395	7.14103	7.57981	8.04046	11.0156	8.44747	5.10623	5.64592	9.32541	8.74137
SS.CHR1.1392	2.03119	2.74227	1.67798	4.06251	0.883885	1.94466	2.14424	1.99162	4.77745	3.15974
SS.CHR1.1393	40.2098	67.1443	41.7497	72.6621	38.1535	34.3507	49.3353	51.5769	67.9753	55.5253
SS.CHR1.1394	7.04961	6.28308	6.77461	6.56068	7.61961	8.10406	4.96136	8.36704	8.07779	8.33129
XLOC_001847	2.17045	7.6119	3.74546	3.26721	1.54218	7.27191	2.77271	1.97855	3.93264	3.96694
SS.CHR1.1395	28.432	30.6169	25.1772	22.6766	26.6607	22.6863	40.0257	32.0306	73.5526	35.0733
SS.CHR1.1399	3.19437	2.8859	3.34176	3.4032	3.3006	3.68451	2.64165	3.68222	2.65512	2.66877
SS.CHR1.1396	0.562252	0.360582	0.698201	0.581649	0.818333	0.312874	0.28891	0.474396	0.766913	0.429791
SS.CHR1.1397	0.753788	2.37224	1.53609	1.28107	1.65294	1.21441	1.29412	1.35242	3.33586	1.38454
SS.CHR1.1398	269.386	334.336	370.458	386.095	320.939	292.703	305.524	260.739	430.761	316.546
SS.CHR1.1400	1.9995	1.60709	2.19885	2.02904	3.49068	2.20966	2.3313	1.30181	1.27517	1.38435
SS.CHR1.1401	13.2677	11.7339	13.4098	10.4061	10.1886	9.41498	11.2681	11.8976	10.4958	9.32148
SS.CHR1.1402	2.84162	3.09731	2.57362	2.19232	2.24955	2.00227	2.61637	2.99211	2.08987	2.19848
SS.CHR1.1403	3.72565	6.0315	9.81587	2.7641	5.1898	7.25289	4.7734	2.41932	4.93703	6.64933
SS.CHR1.1404	8.78872	8.68623	8.21845	7.28902	6.54241	6.55889	8.41328	11.1198	8.04008	7.81056
SS.CHR1.1406	6.71019	8.17844	9.45552	7.0834	5.038	7.47059	5.77218	7.06415	13.4591	8.5267
SS.CHR1.1405	28.7842	33.7126	27.6591	33.107	32.0645	32.2838	35.2162	34.8127	36.1486	36.0307
SS.CHR1.1408	17.5329	26.9984	32.9878	21.6222	22.9317	27.8796	31.8231	28.3881	31.4624	9.87659
SS.CHR1.1407	21.5852	18.6419	19.0787	18.2435	18.1417	16.8604	18.4357	22.5735	22.7642	18.244
XLOC_001864	4.09165	4.55433	4.64255	4.48785	3.87363	4.7168	3.29607	4.52233	3.24713	4.25889
SS.CHR1.1409	71.4816	65.7402	55.0841	63.522	60.2328	85.7578	59.1064	53.2164	54.4494	80.6125
SS.CHR1.1422	0	0.094552	0.096411	0.029183	0	0	0.023995	0	0.039448	0
SS.CHR1.1424	14.6377	9.85341	11.4128	8.80181	9.18394	12.7846	13.0391	17.8936	9.20497	18.8622
SS.CHR1.1414	8.59675	4.38209	0	0	0	0	0.042727	1.90823	1.6386	0
SS.CHR1.1415	1.44493	0.837847	0	0	0	0	0	0.048901	0.380017	0
SS.CHR1.1416	3.29722	2.3015	1.42373	1.81945	1.01218	1.10886	1.69413	3.56778	1.45865	1.38726
SS.CHR1.1417	11.0501	13.9362	14.7406	18.5633	10.4132	15.838	9.47221	5.5225	13.2698	15.0195
SS.CHR1.1418	0	0	0	0	0	0	0	0	0	0
SS.CHR1.1419	2.03518	1.80324	1.64525	1.72609	1.88389	2.31177	2.01573	2.13407	1.27356	1.44225
SS.CHR1.1420	31.167	39.591	38.533	43.9061	29.289	34.2227	37.4516	43.2188	30.0418	39.1902
SS.CHR1.1425	14.5683	12.2387	13.0251	11.761	13.4405	13.6313	13.2145	15.0567	14.9231	13.0601
SS.CHR1.1427	2.8472	2.62296	4.59943	1.20924	3.1472	3.63175	1.24188	1.80872	7.75936	2.01677
SS.CHR1.1426	14.7328	10.7647	18.0486	10.1137	12.8942	10.1375	11.6297	8.94792	10.0701	14.2205
SS.CHR1.1428	32.5247	37.9512	32.9218	30.2671	32.3766	26.8569	26.5815	30.004	35.0638	28.1816
SS.CHR1.1429	53.6187	57.9321	55.5068	51.3895	54.0676	55.911	52.4785	67.8933	55.6876	57.757
SS.CHR1.1431	0.13197	0.174695	0.343339	0.026394	0.026635	0.061397	0.027127	0.117493	0.233139	0
SS.CHR1.1432	3.44696	3.27069	2.55164	3.15795	2.21693	2.84324	1.76985	3.27533	2.87817	2.43417
SS.CHR1.1430	22.3857	21.6763	18.0623	28.7675	16.2539	17.5659	22.2812	24.0525	26.3826	26.8289
SS.CHR1.1434	8.59242	13.9224	8.72885	8.34244	13.04	16.618	6.39782	7.56577	11.9509	6.05143
SS.CHR1.1440	4.90125	1.51819	4.2288	0.638456	3.41027	5.4306	3.96195	6.09578	2.35601	10.6646
SS.CHR1.1435	12.6841	9.64291	17.2411	13.6631	12.6532	11.8338	11.737	13.5983	13.3554	13.3443
SS.CHR1.1436	0.718236	0.419536	0.835671	0.47205	0.661509	0.760608	1.1572	0.834367	0.364324	0.537999
SS.CHR1.1437	0.424194	0.693767	0.306498	0.246942	0.374483	0.191053	0.386647	0.350846	0.512548	0.49422
SS.CHR1.1439	14.2306	12.1811	10.7238	14.6893	10.6852	11.4979	10.8083	12.9049	10.0404	7.15399
SS.CHR1.1441	2.10583	2.64396	2.05995	2.33294	3.56953	2.43114	1.88737	2.07376	2.76814	5.12402
XLOC_001897	3.31233	3.24831	6.11619	2.96449	3.36174	0.592895	0.180067	0.841848	0.461225	6.61844
XLOC_001898	11.1061	7.80524	5.06179	9.16213	10.7742	5.90872	4.26834	7.6067	5.19073	11.9623
SS.CHR1.1442	25.4736	26.5124	3.71639	46.4374	9.23136	8.11587	6.48288	21.2768	34.6419	24.2355
SS.CHR1.1448	4.13175	5.59017	5.404	5.7383	4.63417	4.863	4.84829	6.33806	4.12846	5.48842
SS.CHR1.1443	21.6567	24.6988	22.5768	31.3037	21.1369	14.4954	20.5956	19.7252	28.4766	18.2951
SS.CHR1.1449	14.1856	14.0513	8.19581	10.5932	7.58955	10.6242	9.25975	13.1002	11.1603	9.48409
SS.CHR1.1452	0.194331	0	0.042801	0	0.039482	0	0.104925	0.034417	0	0
SS.CHR1.1453	0.433224	0.128761	0.322605	0.557642	0.226042	0.37523	0.504393	0.734178	0.412573	0.277364
SS.CHR1.1450	0.542125	0.285999	0.209641	0.404849	0.37345	0.124484	0.731756	0.29935	0.685488	0.448825
SS.CHR1.1455	5.68304	5.18541	5.79287	7.82234	5.0677	6.73424	5.53281	6.11935	8.24292	5.65621
SS.CHR1.1456	8.39718	6.43548	4.83423	9.31648	6.87713	5.5373	5.99427	6.99399	7.60874	6.37217
XLOC_004236	0.56794	1.45941	0.802465	1.12405	1.13855	0.588433	0.993621	0.434099	2.63666	0.58738
SS.CHR1.1457	54.4034	44.3402	40.1014	74.1244	36.6593	34.8871	41.1064	44.2972	42.6809	44.9321
SS.CHR1.1458	89.8037	104.307	78.4573	109.814	94.624	78.7824	86.5902	101.186	95.068	99.9755
SS.CHR1.1461	3.4089	5.20391	2.75077	3.27482	3.26957	2.74015	3.89052	4.16125	2.96603	4.58774
SS.CHR1.1459	16.3892	10.1309	10.3187	8.58042	15.4444	10.7441	10.2988	10.7375	13.7918	18.0759
SS.CHR1.1460	14.0861	18.1381	20.4247	19.452	13.7836	16.9161	13.6507	24.0951	17.9147	19.4475
SS.CHR1.1463	23.079	30.7853	30.3426	28.64	16.0436	20.4923	25.2638	24.8087	25.3383	29.9433
XLOC_004244	1.12721	0.514327	1.91878	1.22657	1.67413	0.72367	0.741339	1.2402	0.996188	1.31415
SS.CHR1.1462	37.6306	34.0396	29.2551	42.5265	30.0023	26.2688	30.6583	32.9585	33.8455	32.5563
SS.CHR1.1465	11.982	14.2192	16.8231	18.1596	13.2231	17.8597	15.4675	18.4307	17.5353	13.2175
SS.CHR1.1466	22.5376	20.2506	18.7452	19.8393	19.9628	18.4732	23.2095	22.6883	21.0139	25.8455
SS.CHR1.1471	6.88921	7.14435	8.20421	9.69013	5.17647	6.21836	5.55689	7.4474	10.4745	7.71156
SS.CHR1.1467	3.816	4.96668	7.53749	3.61912	6.20442	4.35275	7.92565	4.23156	6.00785	4.80037
SS.CHR1.1468	84.8175	59.6798	60.8007	34.6311	77.0965	68.8752	67.5703	79.6256	57.8239	46.3257
SS.CHR1.1469	73.1945	45.5649	54.9316	30.6274	58.9453	58.0966	55.0319	71.3257	47.3458	31.6325
SS.CHR1.1473	2.19875	2.26645	0.61135	0.286304	0.559287	0	0.244686	0.240452	0.527773	1.53969
SS.CHR1.1472	6.66691	6.92966	8.82525	7.59324	6.36813	7.10383	7.03269	7.39545	5.74683	7.18392
XLOC_001930	16.6175	12.2971	42.6308	11.008	13.9018	6.05847	30.8486	11.083	2.2922	4.74995
SS.CHR1.1476	1.9748	3.81716	3.10328	0.365477	1.72411	0.516066	2.79619	0.596316	0.36267	0
SS.CHR1.1481	18.4461	14.9497	20.4208	17.1848	14.4489	16.9483	17.4599	19.7896	16.8464	18.9858
SS.CHR1.1482	24.862	20.478	23.1167	26.1901	22.8197	29.0238	25.1405	34.0626	20.005	26.4954
SS.CHR1.1483	10.1143	4.87797	8.61906	8.99755	7.84384	5.82539	6.51735	8.9183	6.49119	7.66047
SS.CHR1.1484	17.9567	33.0464	32.499	49.2851	24.8057	24.6258	34.2042	24.2983	36.1094	40.3261
SS.CHR1.1487	3.70007	2.70108	2.26261	1.95911	2.98669	2.53307	2.76621	3.24978	4.33608	1.17922
SS.CHR1.1488	1.39125	1.68924	1.51918	1.70243	1.569	1.63036	1.43017	1.72131	1.94258	1.48269
SS.CHR1.1486	36.2171	32.3979	35.1317	37.6775	31.2262	41.1269	27.9624	36.833	33.8004	33.8531
SS.CHR1.1490	4.51835	2.84653	4.50579	2.96716	1.89636	6.00576	2.4857	3.87953	4.69695	3.01622
SS.CHR1.1489	15.9139	16.9086	18.8126	21.2985	15.5526	15.6012	17.8203	18.7986	12.9606	15.0234
XLOC_004279	10.1555	7.04231	7.35928	12.1012	9.87126	11.3005	8.33147	6.18794	11.2352	10.6444
SS.CHR1.1493	9.01112	7.25084	9.17497	7.00712	10.5144	11.6154	4.87423	6.28557	5.80513	7.03089
SS.CHR1.1492	168.704	183.534	188.222	199.323	166.708	164.439	167.972	132.533	227.402	177.248
SS.CHR1.1494	64.0463	65.2665	87.1831	78.2696	56.186	58.392	59.0391	82.2677	62.7643	57.2451
SS.CHR1.1495	4.85131	5.68718	3.3485	5.84366	5.6425	5.56674	5.63584	8.55203	5.32384	5.44271
SS.CHR1.1496	18.2781	14.7386	14.0203	15.9949	16.8849	14.6579	15.0946	19.1899	20.519	15.3486
SS.CHR1.1497	12.9091	10.7057	14.4019	36.9155	18.042	18.9413	25.2071	15.6117	28.9498	20.4234
SS.CHR1.1498	1.52042	2.51462	3.32919	1.99554	2.30506	2.87085	4.71498	5.42264	1.51858	4.49158
SS.CHR1.1499	17.3951	18.1435	19.8233	14.6434	18.0146	13.665	16.8675	14.2112	20.3152	13.8412
SS.CHR1.1504	3.83034	0.49034	0.820379	0.649914	0.923331	0.836726	1.0858	0.585333	0.381488	1.0084
SS.CHR1.1502	2.5636	2.91813	3.16521	4.2845	2.31303	2.01187	2.36103	0.891855	6.81592	4.11671
SS.CHR1.1500	3.02589	10.1207	5.92502	8.44445	8.00152	5.64093	10.4963	7.68194	5.56017	6.1243
SS.CHR1.1501	2.57885	3.38106	3.21579	3.43049	3.60523	3.26647	2.25918	3.16649	7.02416	3.30448
SS.CHR1.1503	68.1433	56.8971	64.1785	96.8799	50.8782	73.2356	56.6732	34.1251	156.329	145.78
SS.CHR1.1507	0.585194	0.226748	0.085713	0	0.20414	0.168919	0	0.09256	0.25962	0.495946
SS.CHR1.1505	15.1436	15.302	11.5738	13.9601	15.7657	13.1351	12.8413	13.4552	14.3752	14.2527
SS.CHR1.1512	5.55808	5.7341	3.88768	4.78455	4.30858	4.77406	4.58261	4.17576	4.11325	4.77269
SS.CHR1.1508	37.7762	31.3741	37.2296	30.781	31.03	22.7183	32.6911	35.5312	23.9162	32.4308
SS.CHR1.1509	64.3813	53.7817	51.8145	62.0493	60.5603	53.7371	53.8291	75.0725	56.8276	65.2651
SS.CHR1.1513	49.2289	43.4627	39.8472	31.0923	35.8063	47.5468	44.5316	113.828	31.6607	69.0082
SS.CHR1.1517	0.072956	0.485639	0	1.12839	0.25989	0	0.074983	2.56233	0.110293	0.809833
SS.CHR1.1514	13.7508	19.7206	16.3322	146.103	17.3257	10.1317	111.754	74.9741	58.5996	131.966
SS.CHR1.1515	41.1061	13.6752	50.1126	9.36137	9.4156	26.3652	13.6333	24.8868	26.3675	7.24203
SS.CHR1.1518	61.3424	54.0834	43.9302	34.6231	46.0566	35.1565	56.2268	72.2811	43.4218	54.3005
SS.CHR1.1520	38.9726	19.8155	29.0415	26.9925	27.6582	21.3765	27.5666	35.5272	22.1525	24.1854
SS.CHR1.1521	108.549	23.3183	45.0672	32.0624	45.7437	94.7894	47.6934	70.4094	69.6951	49.7832
SS.CHR1.1522	15.2726	8.59035	7.6862	9.05575	13.0142	11.1542	10.1305	8.92532	11.3446	7.51206
SS.CHR1.1524	3.04886	2.23827	5.69061	5.22485	4.64173	4.20468	3.90638	4.25537	4.12292	3.50421
SS.CHR1.1523	23.9204	16.5572	18.1191	21.0183	26.2813	23.9144	19.7084	15.8615	22.1793	13.6648
SS.CHR1.1525	0.168529	0.612621	0.356332	0.396327	0.370586	0.269321	0.238355	0.185476	0.524368	0.639982
SS.CHR1.1526	22.5363	29.4925	26.1794	24.0525	30.2423	33.4385	28.3244	23.8957	34.3687	28.8867
SS.CHR1.1527	8.33937	17.0444	12.0472	23.9164	6.48925	10.9456	13.6201	11.8035	10.0508	19.9045
SS.CHR1.1528	32.8815	29.5038	27.554	34.2449	30.2522	29.6784	24.355	35.8177	26.3825	31.7458
SS.CHR1.1530	66.5911	37.4782	50.6969	59.9885	58.6467	61.831	47.0987	69.7625	63.3549	62.8163
SS.CHR1.1533	0.089803	0	0	0.06485	0	0	0	0	0.026467	0
SS.CHR1.1532	10.3286	8.84846	12.2996	7.39112	11.8451	16.502	6.00313	4.6897	7.01169	9.6179
SS.CHR1.1531	82.5435	81.0402	88.1825	89.7757	77.0378	90.8797	81.0116	88.3003	75.5474	92.3021
SS.CHR1.1536	0	0	0.056065	0	0.155902	0	0	0	0	0
SS.CHR1.1537	0.260804	0	0	0	0.383433	0	0.043361	0	0	0
SS.CHR1.1535	21.9351	20.7839	21.2227	21.26	21.4622	18.9449	20.1321	24.7589	20.9202	18.5954
SS.CHR1.1540	0.362519	0.270847	0.062761	0.642994	0.338402	0.625738	0.632508	0.317482	0.250663	0.448819
SS.CHR1.1538	48.9816	79.8397	80.8169	70.2992	72.3587	52.6556	77.6308	42.5523	120.343	68.1674
SS.CHR1.1539	12.3994	6.96582	10.2555	13.4498	13.3332	9.99464	22.2094	7.98555	10.3366	11.1322
SS.CHR1.1542	1.50666	1.02443	0.306299	1.20375	0.497242	0.915678	0.944851	6.14744	0.803022	1.64835
SS.CHR1.1541	41.5432	46.5346	38.0438	50.2308	36.8202	40.4735	38.9851	40.0545	44.7083	40.5576
SS.CHR1.1544	0.505789	1.88934	1.93965	3.30261	0.619644	0.578022	2.40542	0.475321	1.18375	1.21361
SS.CHR1.1545	5.90967	8.12596	5.97009	6.7079	12.7982	6.59193	13.6874	13.253	9.5665	9.0302
SS.CHR1.1543	25.8127	28.3508	30.6498	42.8886	24.1629	30.6089	29.6556	33.1769	27.5797	26.8932
SS.CHR1.1546	7.62401	9.3851	5.75214	8.92596	9.09696	7.87742	8.59997	6.92478	9.45801	7.20031
XLOC_004351	7.09659	2.32911	0.718623	3.02167	2.00767	1.33941	3.19462	3.23568	3.06756	0.400482
SS.CHR1.1549	15.9044	24.9712	9.73808	20.935	12.1088	14.053	16.2081	7.83379	12.2929	9.02578
SS.CHR1.1547	0	0	0	0	0	0	0	0	0	0
SS.CHR1.1548	199.482	218.393	314.214	375.388	105.213	251.661	120.478	267.146	492.145	342.84
SS.CHR1.1551	13.6876	13.4062	16.3111	15.0352	14.1689	18.1251	21.2656	16.5831	13.6475	19.1238
SS.CHR1.1555	0.449539	0	0.041439	0.164489	0.064068	0.03065	0.404049	0.056603	0.094372	1.07487
SS.CHR1.1554	3.64116	0.222848	4.39372	0.070479	5.48603	1.6835	1.83629	1.18448	1.38608	1.14498
SS.CHR1.1557	0.52545	0.040802	0.047521	0.19289	0.339293	0.079988	0.077481	0.180215	0.076827	0.189478
SS.CHR1.1552	64.0002	77.3544	69.0106	99.9004	81.9388	69.971	76.5667	55.0823	89.9092	87.2327
SS.CHR1.1553	35.2123	25.5938	26.5817	22.9042	29.5774	28.5201	26.6594	33.0926	26.7359	20.9845
SS.CHR1.1559	334.996	280.608	399.97	344.88	400.189	537.647	373.995	286.692	392.701	336.143
SS.CHR1.1562	0.216736	0.037919	0.058688	0	0.054319	0	0.206271	0.072624	0.047738	0
SS.CHR1.1560	44.7231	45.3388	58.8892	32.3743	59.7053	56.9865	61.8691	38.7325	40.4626	46.296
SS.CHR1.1563	14.241	15.2047	16.3109	17.1284	17.9779	13.1535	15.3917	14.687	15.7881	11.13
SS.CHR1.1564	25.6147	19.3362	29.329	18.6269	25.2962	38.2945	50.4156	20.8383	26.9717	35.9979
SS.CHR1.1565	0	0.346959	1.12084	0.61422	0	0	0	0.198362	0.31479	0
SS.CHR1.1566	0	0	0	0	0	0	0	0	0	0
XLOC_002044	5.66448	2.18692	4.60192	4.73042	0.982357	1.50151	3.20985	1.75673	2.95764	2.20589
SS.CHR1.1567	26.2707	30.2185	26.9907	19.1365	25.8786	19.6747	23.9916	36.9727	20.0891	21.6165
SS.CHR1.1571	0.716519	0.583364	0.222643	0.797008	0.709878	0.69629	0.531883	0.329082	0.104335	0.188293
SS.CHR1.1568	20.6447	21.5699	18.0794	27.31	30.7467	19.5899	20.0614	25.1231	19.8433	18.294
SS.CHR1.1569	27.3255	0.488664	0.91531	21.4013	1.95054	2.44223	0.809061	19.4017	17.2891	0.808611
SS.CHR1.1570	28.2848	34.0627	41.196	44.355	55.4141	46.1358	21.7425	34.6463	10.2981	26.7144
XLOC_004377	2.20979	0.894566	4.97577	1.95775	2.25493	1.98788	3.62387	1.12528	3.21235	1.88601
SS.CHR1.1574	10.3146	5.57298	13.4768	6.32433	8.11779	5.11332	9.25706	8.89915	8.89377	21.2833
SS.CHR1.1572	80.7223	79.0432	79.9929	85.3108	82.7724	57.6932	67.2452	71.7221	92.6314	94.3329
SS.CHR1.1573	28.1803	25.0796	18.9283	29.9045	29.9122	15.0676	15.2072	21.721	28.7306	40.8374
SS.CHR1.1575	10.741	9.22507	12.4084	11.1472	10.3227	11.1674	10.258	9.54586	7.93605	11.2447
SS.CHR1.1577	3.16218	3.49471	1.20961	3.88063	1.95914	1.48786	2.51408	7.38283	4.03689	4.34981
SS.CHR1.1578	1.55143	0.812953	0.855668	0.291928	0.864443	0.675225	0.682886	0.735152	0.614206	2.23997
SS.CHR1.1576	42.1601	41.9536	41.0256	49.3561	46.8585	36.1494	39.2364	38.141	42.2376	42.6403
SS.CHR1.1579	17.3868	18.7784	19.9203	18.6994	25.3318	20.029	17.497	17.9688	18.6152	19.7735
SS.CHR1.1580	17.7526	20.8533	21.0301	19.0994	17.8214	20.5428	14.8322	18.7258	21.619	18.7059
SS.CHR1.1581	5.67582	6.31162	5.24686	5.39436	4.75311	4.92032	4.18604	4.39838	5.04542	6.00514
SS.CHR1.1582	61.4335	68.0913	64.4824	70.5541	67.4459	48.22	45.2618	69.5844	57.2456	64.8955
SS.CHR1.1583	8.15793	5.8078	5.20356	15.0959	7.81966	10.603	7.77035	12.3213	10.6821	18.552
SS.CHR1.1584	3.04882	3.08136	2.73801	3.45652	3.14828	3.34738	3.1814	3.55756	4.95013	2.35329
SS.CHR1.1585	51.5515	49.3782	45.8067	60.8826	60.8527	55.8091	62.6257	87.1926	51.7017	50.2466
SS.CHR1.1589	0.839489	0.586747	0.324026	0.250726	0.232528	0.383756	0.272796	0.77804	0.25303	0.552846
SS.CHR1.1588	0.933669	0.175867	0.161	0.204669	0.55268	0.305777	0.704983	0.347147	0.134012	4.01373
SS.CHR1.1587	23.2836	14.8138	10.7007	11.2681	11.9696	11.5841	11.583	11.3207	12.5976	16.6335
SS.CHR1.1590	29.3906	29.1564	23.809	23.146	20.3385	19.8047	14.7602	23.1507	37.2166	21.5565
SS.CHR1.1592	0.067126	0	0	0	0.084669	0	0.103026	0	0.134738	0.204337
SS.CHR1.1591	45.722	43.6934	46.4766	35.0149	35.498	38.7679	34.4584	46.1083	51.5705	46.4327
SS.CHR1.1593	3.44072	7.7288	4.70895	4.99334	8.6898	7.25879	6.92551	9.93762	5.61421	7.53773
SS.CHR1.1594	16.7061	20.2827	13.6675	16.2545	18.437	9.19022	17.8708	15.9209	18.6616	14.1799
SS.CHR1.1597	1.2887	0.474623	1.04663	0.350341	0.915752	2.20487	1.36615	0.946708	2.81733	1.32436
XLOC_002089	0.838927	0.189017	0.710377	0	0.069851	1.1475	0.048528	0.430947	1.45111	0.363553
SS.CHR1.1598	3.30539	0.683332	2.00275	0.392119	0.538858	0.084456	0.12461	1.0333	1.52531	0.486848
SS.CHR1.1595	9.84763	9.35621	8.26849	9.47907	12.5074	12.5033	9.38783	16.5791	11.9139	6.4933
SS.CHR1.1596	0	0	0	0	0	0	0	0	0	0
XLOC_004400	4.23549	2.23543	0.482348	0	1.05205	2.15751	0.020607	2.33682	0.151097	0.270711
SS.CHR1.1599	25.3662	19.3218	19.618	18.5925	24.6481	21.3311	16.895	24.0651	22.6841	20.1382
SS.CHR1.1601	1.80354	6.34584	6.14776	8.94184	2.63519	5.713	2.35696	0.900516	12.3755	5.78262
SS.CHR1.1600	76.0923	59.5762	71.656	80.368	76.4678	73.4936	81.2162	73.6399	98.0425	75.0864
SS.CHR1.1602	3.90033	7.9761	10.1362	10.778	11.4576	11.9894	9.06062	3.80596	4.65843	14.1534
SS.CHR1.1603	8.87646	14.3946	10.8878	12.1144	10.0116	14.8012	15.7692	11.0662	13.8186	14.7502
SS.CHR1.1604	24.7632	13.0718	21.119	5.75025	26.9562	10.206	15.8208	32.4031	6.53346	12.1872
SS.CHR1.1605	0	0	0	0	0	0	0.128665	0.064386	0	0.036418
SS.CHR1.1606	3.48159	5.24247	7.47042	3.40124	6.30729	5.37664	6.21478	6.08443	5.33326	6.11819
SS.CHR1.1607	0.228796	0.315688	0.283182	0.154392	0.130831	0.148894	0.239303	0.196858	0.160389	0.03306
XLOC_004425	6.20594	4.40929	5.77867	4.148	3.31435	5.81122	4.88399	4.2994	5.22546	3.75598
SS.CHR1.1608	39.1675	22.8941	30.6348	49.7921	37.2241	31.9507	38.2978	36.7988	42.8623	24.9097
SS.CHR1.1609	23.3615	26.9816	18.4935	16.7086	23.6036	17.7924	15.8429	26.5359	20.9671	11.8206
XLOC_002109	191.2	242.068	190.991	256.664	168.92	175.515	268.649	181.058	259.457	240.126
SS.CHR1.1613	9.81813	10.3754	9.7149	5.17269	11.7682	8.27111	7.45584	9.98728	7.92007	7.53114
SS.CHR1.1610	6.62518	15.9329	31.7322	4.60432	7.03158	10.1924	9.20943	6.3058	28.8906	12.9408
SS.CHR1.1611	19.3916	17.3112	5.60742	21.0007	15.1447	15.1349	15.0522	9.64297	10.0211	4.622
SS.CHR1.1612	35.3511	39.7811	26.6909	35.9514	37.1212	29.9467	29.6863	38.8708	28.4599	21.8482
SS.CHR1.1614	6.00217	7.71682	6.59256	6.50335	6.19691	4.81009	6.39362	6.45005	8.11847	6.64318
SS.CHR1.1615	3.42306	5.65347	2.58322	4.75403	3.06508	1.80158	2.29197	7.53533	4.29119	6.57323
SS.CHR1.1616	4.92039	4.4929	4.13288	6.60386	4.14838	4.52777	5.02105	5.78629	4.94479	4.15671
SS.CHR1.1618	5.67609	4.83762	4.71624	5.26807	3.81622	4.91882	3.22951	7.83589	7.86528	6.08448
SS.CHR1.1617	32.6206	25.1695	30.9134	25.3578	24.0959	24.074	19.4379	18.6295	16.6222	18.2452
SS.CHR1.1619	4.66063	3.62155	3.24347	4.77673	5.57662	4.98705	5.45452	4.1589	3.25876	6.99494
SS.CHR1.1620	4.71313	11.8362	3.8089	7.09547	2.5226	2.88896	5.05376	4.24285	7.04941	1.23447
SS.CHR1.1624	0	0	0	0	0	0.11509	0	0	0	0.132946
SS.CHR1.1625	6.07414	7.78532	8.35243	10.3647	13.7768	10.4868	10.2079	3.8792	4.7037	6.25187
SS.CHR1.1621	5.1756	7.32953	7.73964	9.04236	5.38419	6.24047	5.10567	6.99939	5.87815	5.09199
SS.CHR1.1626	13.3446	14.5296	12.2612	18.6377	12.3681	11.2543	11.0649	12.1838	13.5163	12.0761
SS.CHR1.1628	2.8639	1.90959	1.89684	3.08508	4.10696	2.65705	1.79883	1.38407	2.35012	2.96287
SS.CHR1.1629	12.9695	7.67893	9.513	7.08601	13.8239	12.1142	11.8482	11.0956	5.44883	9.56169
SS.CHR1.1631	16.0861	23.451	14.9697	24.8709	11.9383	22.7973	16.1701	9.45595	35.3964	19.6846
SS.CHR1.1632	1.74086	1.53341	2.51236	1.53403	2.67218	2.8785	3.45788	3.93227	1.20622	0.969878
SS.CHR1.1633	8.06619	7.29399	11.0605	4.06717	10.7833	8.0365	10.29	6.06696	7.46607	5.14063
SS.CHR1.1634	17.9077	13.67	15.3687	9.66414	13.9745	18.169	15.5083	13.7856	14.604	9.77126
SS.CHR1.1635	36.7511	7.74811	22.3965	25.5209	29.8615	40.7711	26.808	32.088	37.4711	24.4684
SS.CHR1.1636	0	0	0	0	0	0.0505	0	0	0	0
SS.CHR1.1637	2.06027	2.14994	1.93089	1.80566	2.69386	3.2042	2.65091	3.973	1.7422	2.44507
SS.CHR1.1638	0	0	0	0	0	0	0	0	0	0
XLOC_002139	3.15817	2.13204	3.03339	3.04869	2.86874	3.41774	2.4554	3.68668	3.27599	2.61589
SS.CHR1.1639	17.2807	16.4952	17.7159	19.942	15.8093	16.1486	15.7156	13.4818	14.6319	16.5977
SS.CHR1.1640	13.4653	16.738	20.844	8.60269	21.2222	11.5154	9.84134	12.0927	9.01262	24.6098
SS.CHR1.1641	43.7234	46.3595	51.2576	33.0299	44.3602	40.8952	30.6645	34.7168	44.6875	52.7897
SS.CHR1.1644	3.79417	5.4204	6.73027	8.23486	10.9959	4.75006	10.5187	5.36454	1.206	9.39879
SS.CHR1.1646	2.66663	1.93393	2.18222	0.675295	2.78711	0.099023	3.50205	0.155015	0.031716	4.09033
SS.CHR1.1647	0	0	0	0	0	0.284174	0	0.220587	0	0
SS.CHR1.1643	20.0628	19.0861	18.3867	18.4178	20.8806	20.0763	16.2763	24.6561	15.028	19.4769
SS.CHR1.1648	6.2976	4.17599	7.38878	4.80865	12.7293	4.29758	9.15667	3.69304	7.71747	6.81764
SS.CHR1.1649	0	0	0.161418	0	0.104293	0	0.379833	0	0	0.079559
SS.CHR2.11	2.44136	2.40898	2.08619	1.78884	2.30914	2.10567	3.21141	2.68539	3.70334	2.82286
SS.CHR2.1	0.674361	2.34826	1.27636	0	1.36858	0.828336	0	1.56457	2.51064	1.36964
SS.CHR2.4	0.845086	0.396037	0.461141	0.609716	0.295267	0.98737	0.625453	0.761578	1.51021	0.214704
SS.CHR2.2	0.484431	0.933447	1.53706	1.83282	0.559909	1.32833	0.232457	1.3153	1.25519	0
SS.CHR2.3	0.597035	2.67472	1.92742	2.10202	0.660936	0.972165	0.811515	2.73946	1.38629	1.41553
SS.CHR2.5	9.73165	14.6016	10.4666	10.182	13.0559	9.82122	10.8781	10.5805	14.3966	11.4358
SS.CHR2.6	0	0.111822	0	0.092369	0	0	0	0	0	0
SS.CHR2.7	0.930864	1.17803	1.22385	1.55505	0.663083	1.65594	0.719954	0.823479	0.992839	0.92138
SS.CHR2.8	10.8947	8.7594	11.5253	5.08355	8.12222	9.00272	9.38061	4.53142	21.463	12.605
SS.CHR2.9	4.91534	6.50251	5.0069	6.04486	5.41813	6.71673	5.1695	4.77639	5.70652	5.34471
SS.CHR2.10	16.8285	9.2877	12.9871	13.2801	9.93002	14.0136	9.50648	14.3694	13.0873	6.35961
SS.CHR2.12	16.5162	18.843	20.6797	30.657	28.0997	17.9398	19.4243	23.5891	26.4567	18.7496
SS.CHR2.13	7.56746	7.08754	7.51555	5.95731	7.94476	7.61462	5.45798	6.53533	6.86194	5.67814
SS.CHR2.14	34.0473	34.1728	56.9517	31.9323	36.3583	46.1439	38.605	39.5339	43.4886	43.4743
SS.CHR2.15	0	0.09966	0	0	0	0	0.12766	0	0	0
XLOC_066449	11.0531	20.1917	20.9147	19.4048	17.4227	19.1642	29.9007	11.7638	10.4676	30.9126
SS.CHR2.16	8.34351	12.4695	9.33364	12.5616	9.84339	12.0769	12.8841	10.7278	11.9802	12.4725
SS.CHR2.18	7.14278	5.91221	6.31127	7.16165	6.9943	7.97667	7.06654	7.68947	14.0642	4.69077
SS.CHR2.19	2.68871	2.36067	1.22335	0	0.234706	0.151347	0.359001	0.120806	2.8082	0
SS.CHR2.17	28.7147	31.4713	24.7375	27.2592	32.6876	28.9151	33.2203	30.1048	19.5818	34.1873
SS.CHR2.21	0.383604	0.662415	0.545232	0.193677	0.471866	0.336895	0.46884	0.216541	0.20852	0.486564
SS.CHR2.23	0.914549	1.40356	0.991776	0.200959	0.565834	0.224652	0.314954	0.412187	0.717528	0.329513
SS.CHR2.22	3.34615	2.29308	4.0359	5.40933	3.50601	4.21413	3.03954	2.77508	3.19406	2.0515
SS.CHR2.20	23.7065	20.8003	17.9399	22.3847	24.7959	21.1584	19.0123	23.5012	20.3587	17.953
SS.CHR2.27	0.307762	0.389698	1.00488	0.926366	0.271947	0.636611	1.0483	0.198774	0.412659	0.565087
SS.CHR2.26	0.979732	0.936613	0.95254	0.39547	0.653998	0.364115	1.41682	0.277983	0.456389	0.416549
SS.CHR2.25	13.4514	12.0383	9.47053	12.4195	10.3609	9.45869	10.1689	10.2046	13.0772	9.45625
SS.CHR2.30	0.048239	0	0	0	0	0	0	0	0.090216	0
SS.CHR2.31	13.067	23.7781	20.212	20.697	22.4791	20.0785	21.4833	22.0987	18.889	18.9492
SS.CHR2.29	32.3429	25.7532	27.5509	30.2811	26.72	33.1331	36.1812	30.1573	23.8239	28.8604
SS.CHR2.41	0.836345	1.43173	1.5109	1.26295	1.78016	0.935645	1.09388	1.20473	1.86622	0.960459
SS.CHR2.40	10.2903	19.9036	8.27786	29.5969	11.3636	15.1812	8.61	18.7985	46.0452	28.9363
SS.CHR2.42	2.16014	2.65264	3.0608	2.56162	3.23526	2.20544	3.86433	2.05423	4.09406	4.66853
SS.CHR2.32	91.7313	79.6436	92.1919	83.7483	93.8275	101.339	90.3512	110.883	77.4663	99.1751
SS.CHR2.33	11.7548	13.059	17.6977	9.49314	12.8722	24.2635	25.8305	24.9423	4.43881	12.0952
SS.CHR2.34	10.4954	6.33095	6.84016	5.69861	7.84008	3.47261	10.105	6.37901	9.24043	4.55725
SS.CHR2.38	10.8034	7.73972	9.73272	7.1623	10.2041	4.46496	15.5609	9.43281	11.3487	6.20523
SS.CHR2.35	0.352916	2.75766	0.144893	0.324052	0.365606	0.205479	0.072509	0.463678	3.23396	2.80545
SS.CHR2.37	6.13345	0.984724	4.63791	4.68547	6.4995	6.7988	10.5074	0	1.84107	6.50603
SS.CHR2.39	34.1458	23.5767	21.2773	35.9595	34.364	25.4008	32.4513	28.2261	37.079	37.2353
SS.CHR2.48	0.0596	0	1.45755	0	0.426055	0.169448	0.136124	0	0.118243	0.799623
SS.CHR2.47	0.324755	0.285464	1.68269	1.13495	3.00171	0.028405	0.449525	0.245938	0.934092	0.237632
SS.CHR2.49	2.45251	2.36544	3.73955	5.19016	2.9102	2.00888	2.16326	2.78752	4.87334	3.80332
SS.CHR2.50	6.31804	4.8913	7.51842	6.30181	17.3308	9.34763	7.99063	7.03387	10.0379	9.00411
SS.CHR2.43	9.22878	4.24702	2.89702	1.43237	2.38378	2.17584	2.19381	5.57607	11.5915	4.24244
SS.CHR2.44	5.56177	10.7128	5.24931	5.90817	4.2335	6.25788	2.09841	7.31226	9.86191	6.25546
SS.CHR2.45	0.05451	0.01965	0.02286	0.039089	0.0033	0.054695	0.184278	0.058405	0.018719	0.010569
SS.CHR2.46	16.13	37.5288	26.0397	54.0869	25.4419	20.4017	20.4166	31.6517	29.1243	40.9519
SS.CHR2.53	4.26709	7.8974	7.81277	7.82126	3.35695	3.18079	8.07338	5.05962	3.59966	3.38729
SS.CHR2.54	7.46679	8.01957	8.28127	7.07773	11.0708	8.15346	7.69061	11.2592	15.0099	5.75827
SS.CHR2.51	20.1388	22.613	21.3732	17.7841	21.6377	19.7378	18.6609	25.5253	16.6392	20.9088
SS.CHR2.56	0.098499	0.247614	0.191665	0.0394	0.252934	0.240081	0.161573	0.035361	0.104822	0.080003
SS.CHR2.55	7.37756	9.96316	2.58924	4.09248	11.426	8.18171	13.9241	15.0787	3.32761	0.715367
SS.CHR2.79	0.448631	0.399737	0.79315	1.2691	0.147808	0.242565	0	0	1.45344	0.214198
SS.CHR2.80	13.7631	32.8346	22.9605	28.6418	19.5224	36.4976	20.0643	22.661	34.0317	41.0831
SS.CHR2.81	1.89908	2.64296	1.94409	2.34424	2.56793	2.91131	7.38423	3.6036	2.12173	2.24145
SS.CHR2.82	4.27644	1.32753	2.19911	3.92979	2.28166	0.622415	2.42027	10.8735	3.26261	5.72926
SS.CHR2.57	11.5194	13.4657	13.8773	16.3676	12.1978	12.2773	12.3748	15.0316	6.78113	14.5477
SS.CHR2.58	0.617382	0.957946	1.27685	0.888965	0.611114	1.36467	1.87528	1.42875	1.20173	0.977053
SS.CHR2.59	0	0	0	0	0	0	0.078409	0	0	0
SS.CHR2.60	16.995	17.8697	16.4095	11.4335	17.6641	18.4588	15.9161	15.9899	10.9223	14.3358
XLOC_066481	0.607579	0.216424	0.084021	0.375382	0	0.664959	0.038686	0	1.72833	0.116193
XLOC_066482	7.63579	12.0639	10.1188	10.9604	10.0011	12.5626	10.0979	3.62048	10.8284	11.9936
SS.CHR2.61	0.018419	0	0.129347	2.54508	0.052524	0.067519	0	0.023047	0.012802	0.591172
SS.CHR2.62	10.2341	11.7441	13.5394	12.3177	10.1554	12.9969	11.3679	12.372	14.2849	14.9806
SS.CHR2.64	0	0.200641	0	0	0	0	0.127564	0.379095	0	0
SS.CHR2.65	1.56359	0.705109	0.616761	0.517451	0.573929	1.20103	1.51062	2.14245	0.285263	1.22188
SS.CHR2.66	15.8332	12.7707	7.74969	9.79121	5.89849	4.84216	9.89982	18.3417	3.38194	10.1108
SS.CHR2.67	122.135	122.481	100.41	152.517	111.065	114.702	121.47	121.054	124.834	140.834
SS.CHR2.68	0.408996	0.1445	0.20348	0.130655	0.097504	0.259337	0.033782	0.153038	0.029344	0.182185
SS.CHR2.69	2.67636	3.65415	3.85254	3.4011	3.96893	4.15805	4.98429	4.96994	2.8672	4.43575
SS.CHR2.70	73.0825	69.8797	66.0669	40.5461	62.4837	87.6461	59.0089	82.8168	60.9564	43.9737
SS.CHR2.71	36.8744	31.8193	40.0798	33.8172	25.779	52.2157	35.2834	36.7136	33.9945	33.2618
SS.CHR2.72	61.9424	60.7237	53.9104	53.1266	50.0933	73.3045	71.0281	59.434	42.471	68.4603
SS.CHR2.74	7.87963	6.79023	6.05828	8.22917	8.18491	7.47973	6.25734	7.74667	9.97895	7.73352
SS.CHR2.73	0	0	0	0	0.036113	0	0	0.074826	0	0
SS.CHR2.75	0	0	0	3.05007	0.419829	0	0.086741	0.034782	0	0.258221
SS.CHR2.76	15.3049	17.0366	8.42576	52.2597	31.4675	3.23702	40.7072	98.7052	18.1239	95.9896
SS.CHR2.77	19.1054	33.2884	31.4291	38.1706	36.7328	42.1966	42.8083	34.0768	32.5323	37.5784
SS.CHR2.94	0.027157	0	0	0	0	0	0.027912	0	0.266618	0.055144
SS.CHR2.95	0.064545	0.110175	0.083835	0.127162	0.129178	0.190693	0.122699	0.193861	0.044805	0.09376
SS.CHR2.97	0.077103	0.383661	0.243894	0	0.179738	0.122142	0.241577	0.258673	0.175928	0.29878
SS.CHR2.96	17.1083	9.38193	15.704	14.5424	10.6528	11.5879	11.2713	14.0291	12.3033	13.8383
SS.CHR2.98	19.026	22.4487	21.0543	19.2646	24.9203	41.0726	15.6665	16.2977	10.5989	21.0493
SS.CHR2.99	0.52662	1.23859	0.958164	1.13753	0.28416	0.66987	0.306665	0.465589	1.13245	0.151894
SS.CHR2.83	0	0	0	0	0	0	0.099045	0.495865	0	0
SS.CHR2.84	58.207	81.9753	82.804	127.063	58.5591	104.582	85.7723	64.0704	138.358	106.202
SS.CHR2.85	157.274	122.593	123.477	72.8872	155.729	152.611	110.522	111.459	121.009	109.894
SS.CHR2.86	0.059792	0	0	0	0.121074	0	0	0	0.107119	0
SS.CHR2.87	14.0625	10.6351	11.952	12.0723	14.7407	16.6052	14.0889	15.6644	12.6736	11.0446
SS.CHR2.88	24.2172	35.7773	34.3875	36.7045	54.7532	21.1057	56.9216	26.2231	30.7847	52.9355
SS.CHR2.89	0.898103	1.36088	0.66455	0.60216	1.08377	0.977486	2.39994	1.22589	0.548147	0.849671
SS.CHR2.90	51.0528	46.9062	56.3662	41.7242	60.4316	40.5531	73.7347	40.8986	57.5271	52.6519
SS.CHR2.91	57.2476	77.7484	45.382	55.9345	96.5336	75.1301	50.6242	58.5494	96.9879	61.3301
SS.CHR2.92	0	0	0	0	0	0	0	0	0	0
SS.CHR2.93	8.01783	7.29662	7.6356	7.94437	11.2677	10.7055	7.01261	6.19612	8.43112	7.0606
SS.CHR2.100	0.955205	0.844297	1.48454	2.46678	2.25721	5.97365	1.02059	1.36929	7.02313	1.28162
SS.CHR2.101_SS.CHR2.102	10.1376	12.5587	10.7286	5.79277	11.0763	5.22024	4.23693	5.36679	10.183	6.65068
SS.CHR2.108	1.31422	1.31612	0.412699	7.92937	0.356754	0.1939	1.1822	8.27263	11.4893	1.49903
SS.CHR2.109	0.539545	0.11525	0	0.15797	0	0.288558	0.215784	0.08825	0.054845	0.038751
SS.CHR2.111	17.7001	20.8895	17.9429	16.1343	30.4163	22.6464	13.9693	32.7963	17.2548	31.659
SS.CHR2.114	0	0	0	0	0	0	0	0	0	0
XLOC_069117	0.08173	0.105871	0	0	0.083025	0.28581	0.042	0	1.38733	0.08353
SS.CHR2.112	27.5827	29.8567	24.489	37.1134	35.1289	33.0268	22.0877	30.2931	35.7853	22.1044
SS.CHR2.117	0.881006	0.407964	0.51161	0.678558	0.899201	0.297767	0.466045	0.312184	0.402345	0.397485
SS.CHR2.115	98.8801	114.382	138.495	110.923	189.271	119.931	145.27	90.3741	136.396	168.936
SS.CHR2.116	2.89935	3.11868	2.67491	5.55733	1.85054	3.38599	4.91258	2.34406	3.2897	4.06004
SS.CHR2.120	0.097092	0.389562	0.907105	0.074921	0	0.145691	0.075714	0	0	0
SS.CHR2.119	0.338466	0.234968	0.284988	0.105957	0.129897	0.193875	0.609699	0.564772	0.061659	0.113325
SS.CHR2.118	10.0068	11.9893	12.885	12.4469	11.8172	14.2782	14.6926	12.7932	12.4321	12.5563
XLOC_069106	48.3099	64.9728	33.3031	40.5145	23.4542	44.6475	43.1654	47.6438	45.9305	50.4697
XLOC_066537	9.89194	4.28751	4.88926	3.69001	5.14583	6.35286	7.10765	5.84652	5.78593	8.17255
SS.CHR2.104	2.40299	4.48005	2.17202	5.60537	5.4895	1.62911	3.85643	1.76432	5.12114	1.42345
SS.CHR2.105	0.858469	1.23611	3.38493	2.50217	2.40687	1.71424	2.03131	0.935489	0.636953	0.336723
XLOC_066561	2.09811	1.50339	1.42407	1.26852	1.33893	1.86492	1.82762	1.64879	1.0581	1.87705
SS.CHR2.107	0.313284	1.13007	0.18509	0.69175	0.654836	0.253259	1.81707	0.615366	1.4226	0.386174
SS.CHR2.121	15.8595	18.5012	17.8714	18.1327	19.5715	15.5249	19.9305	22.0458	24.8309	24.3242
SS.CHR2.122	24.2765	25.2349	25.7563	24.8299	24.2189	21.5293	20.5066	21.9216	20.9821	21.3379
SS.CHR2.123	12.388	11.3059	11.3414	13.0604	11.6199	11.5641	10.3064	14.8423	11.566	10.6796
SS.CHR2.125	0.040512	0.278641	1.51538	0.480355	0.470746	0.375499	0.565761	0.740995	0.494863	0.818227
SS.CHR2.124	26.8421	23.3152	26.9055	19.9531	29.4485	26.769	20.666	20.0467	23.0156	18.59
SS.CHR2.127	1.72097	0.765506	1.17076	0.584855	0.952107	1.0873	0.968244	1.64899	1.59988	1.3924
SS.CHR2.126	46.296	45.1262	40.243	39.4135	38.2903	39.6254	44.5449	39.2553	49.2278	41.2144
SS.CHR2.129	0.490156	1.1602	0.8591	0.977526	0.149777	1.26328	1.78796	0.327723	1.97212	0.638348
SS.CHR2.128	1.92049	1.19289	1.44443	0.691842	1.16331	1.49897	1.22513	1.67871	1.72985	1.49116
SS.CHR2.130	7.19765	5.5547	5.22959	7.88032	5.00337	8.62384	6.47684	5.70529	10.5362	7.65319
SS.CHR2.132	11.6031	14.3365	13.8437	14.669	15.8765	12.7431	15.8242	16.1835	11.4817	10.8544
SS.CHR2.131	49.3583	43.1762	47.3755	45.0107	48.9557	48.9764	42.3793	48.8118	44.7047	57.3539
SS.CHR2.135	1.76418	0.578842	1.05857	0.748087	1.2864	0.62936	1.56102	0.40733	2.18532	0.626257
SS.CHR2.136	3.60501	3.12113	6.68487	4.42178	6.47677	8.28027	4.06965	2.47701	6.90803	4.21229
XLOC_069143	3.76907	5.99018	4.69389	4.72463	5.807	5.63825	4.41697	3.24318	6.09618	5.36128
SS.CHR2.133	49.5946	49.2601	30.0555	26.1775	39.4322	21.6921	35.5056	23.1353	47.4719	43.3755
SS.CHR2.134	80.2685	100.6	111.707	53.3184	68.8908	106.685	47.9553	60.5771	54.491	105.044
SS.CHR2.138	164.765	162.889	139.547	158.726	141.883	127.862	180.958	109.621	153.084	137.648
SS.CHR2.139	46.3074	55.9192	47.2394	41.4976	55.216	52.9099	46.9419	66.0566	44.8908	54.4985
SS.CHR2.140	14.5173	14.5996	14.9429	12.4646	9.71782	13.9742	13.22	12.4271	16.5247	19.397
SS.CHR2.141	3.28628	4.8242	3.13297	2.87746	5.49489	3.62916	3.37174	3.48094	2.78532	3.40342
SS.CHR2.143	17.7091	10.5846	25.6939	13.9834	14.0654	20.0376	19.6362	21.0432	24.5872	16.1614
SS.CHR2.142	80.9283	64.8609	53.2088	83.8949	78.9138	57.4362	65.2803	108.046	64.9326	78.1343
SS.CHR2.144	5.45552	3.76315	4.31543	4.30538	4.24068	3.5358	4.60439	4.82947	4.40054	3.31987
SS.CHR2.145	26.0095	26.7393	23.4605	23.678	27.4304	24.3197	21.2995	29.2319	23.8088	29.9951
SS.CHR2.146	7.89409	6.26569	7.22589	8.83445	6.27764	6.77302	7.66916	6.5515	6.35025	7.76657
SS.CHR2.148	27.0863	18.3936	24.2517	18.042	14.8591	27.6638	27.0396	21.2337	21.7277	48.585
SS.CHR2.149	0.560376	1.4196	1.15107	2.42761	1.61412	2.22053	1.82154	1.8134	1.51638	0.782875
SS.CHR2.147	6.5027	7.30406	6.5238	6.53008	6.79308	7.4553	6.35183	7.23887	7.23133	7.6317
SS.CHR2.150	9.34958	18.4127	5.57626	11.5235	8.12384	8.89995	7.89859	11.2061	13.7414	8.45558
SS.CHR2.152	1.2812	1.48489	4.93181	4.69788	2.54045	3.18711	2.72763	2.3824	2.99058	2.77952
SS.CHR2.154	0.407154	0.366687	0.352472	0.283412	0.47275	0.771185	0.854531	0.547838	0.679749	0.342258
SS.CHR2.153	8.62268	6.20035	6.61071	9.91418	14.1156	6.69293	6.81738	9.28551	8.31047	8.30383
SS.CHR2.158	2.42028	3.92833	5.86543	0.825157	4.92561	1.52021	3.25698	3.44297	1.93579	1.70301
SS.CHR2.157	0.414169	0.245498	0.367426	0.0872	0.30214	0.089197	0.730191	0.164429	0.179294	0.135596
SS.CHR2.155	14.8829	15.6185	14.9214	10.2762	14.5979	14.1555	12.8094	15.9502	13.3793	14.5613
SS.CHR2.159	24.0946	42.9846	26.6751	14.6532	22.7952	18.7614	25.2066	39.6331	26.1151	32.7434
SS.CHR2.160	40.0522	37.8647	32.2141	45.8082	34.5529	35.7741	27.3384	40.3524	44.9009	51.2484
SS.CHR2.162	4.33711	4.83503	1.57955	3.61021	1.80261	5.88251	4.04349	2.67329	2.22218	5.01811
SS.CHR2.163	6.2729	4.04589	4.99017	2.9105	3.32359	3.0616	3.84127	2.78612	4.02895	4.5272
SS.CHR2.166	0.881531	0.117122	1.19585	0.943464	0.799873	1.14631	1.03248	1.24658	1.63484	0
SS.CHR2.164	12.3348	11.5895	20.1769	12.8451	15.6359	14.7475	12.9474	10.3363	14.6588	15.7236
SS.CHR2.167	6.65993	7.07127	9.24913	9.04441	14.5322	13.6454	12.9733	9.96406	3.56041	6.79721
SS.CHR2.171	4.25425	4.75098	3.95371	7.37664	2.78322	7.88124	4.88269	3.65964	3.75378	4.76846
SS.CHR2.169	12.8146	11.9985	12.3164	14.5749	7.45474	9.24174	8.70694	8.4528	10.5816	11.0127
SS.CHR2.170	4.76061	1.84913	2.96117	1.34364	3.24177	1.80884	1.11201	0.902253	5.68252	2.63437
SS.CHR2.172	12.6817	9.54043	11.2812	17.8826	10.0501	10.1821	8.60366	12.1314	10.378	10.1179
SS.CHR2.173	8.19261	1.9769	3.30305	2.84273	1.87419	4.1236	3.24818	4.63729	4.50429	2.19726
SS.CHR2.176	0.143481	0.233559	0	0.0844	0	0	0.359704	0.125236	0	0
SS.CHR2.175	0.257194	0.262735	0.05183	0	0	0.227414	0.396997	0	0.06499	0
SS.CHR2.174	14.0253	4.47938	6.75951	5.44802	0.084314	5.47564	5.37835	0.49493	1.675	4.98538
SS.CHR2.177	9.11346	7.6973	7.63306	7.29786	8.05971	6.86461	6.87802	6.17827	6.47117	7.35582
SS.CHR2.180	0.628477	0	0.223996	0	0	0.170161	0	0	0	0.018251
SS.CHR2.178	14.8984	20.2934	14.2787	16.4228	34.4314	19.1621	20.4853	21.266	14.9863	26.2906
SS.CHR2.179	45.6915	16.6025	18.629	11.0799	25.1583	24.5155	15.0725	24.0389	19.5815	34.3837
SS.CHR2.182	0.018855	0.965414	0.923991	0.823527	0.479586	0.347297	1.95858	1.05669	1.09022	0.103397
SS.CHR2.181	8.3896	6.54636	7.97277	7.71887	4.93336	4.96348	6.15264	8.44273	7.36273	7.75394
XLOC_066636	12.4888	13.767	21.5781	22.4354	11.0366	12.6417	14.1939	14.5459	17.0944	14.4023
XLOC_069191	7.0419	8.09936	8.55633	5.74707	7.15764	10.2078	5.05021	9.16752	8.34882	10.0426
XLOC_066641	14.5691	18.0474	14.9954	22.5476	15.345	24.3903	11.6663	12.2047	19.9406	15.8681
XLOC_066643	0.126756	0.251889	0.207988	0.189078	0	0.472262	0	0.041228	0.046967	0.492244
SS.CHR2.183	3.9555	5.53235	4.23822	4.80196	6.21732	5.61208	6.73276	3.96218	3.85408	4.16049
SS.CHR2.184	16.0761	14.293	15.598	17.0946	14.5158	12.8647	14.9007	16.5169	19.0096	11.5819
SS.CHR2.185	10.4079	6.21657	6.02968	7.63245	6.35423	8.7143	9.52138	5.15552	8.6058	8.91865
SS.CHR2.187	0.868102	1.69167	3.32817	2.78361	1.98585	1.20154	2.37096	1.44128	2.28797	4.1425
SS.CHR2.186	11.66	15.7029	16.0797	11.0698	17.1188	14.2023	12.2445	10.7087	11.4277	13.56
SS.CHR2.189	0.276306	0.253756	0.270141	0.518559	0.518891	0.371733	0.62187	0.431469	0.234222	0.478286
SS.CHR2.190	2.28834	3.98972	2.09386	2.22884	5.27702	1.16634	3.34847	1.69892	2.35373	1.53582
SS.CHR2.188	25.1913	34.3314	18.2014	23.3293	38.7614	12.1477	28.3546	23.1226	16.4972	27.5478
SS.CHR2.191	11.1035	6.82976	8.48959	11.32	9.85648	6.47184	8.14598	9.40015	11.6456	13.4647
SS.CHR2.196	1.26386	0.783342	1.10947	0.716046	1.21482	1.45469	1.54888	1.37453	0.811994	1.35245
SS.CHR2.197	0.386599	0.256964	0.372008	0.368912	0.700054	0.425899	0.396299	0.970909	0.363415	0.394405
SS.CHR2.192	1.55197	0.718715	0.723486	1.14972	0.483103	0.830428	1.04237	0.531496	0.893472	1.1613
SS.CHR2.193	18.0112	29.8473	20.2069	21.1565	20.8236	19.2223	26.8595	16.7832	21.2316	21.939
SS.CHR2.195	12.5457	10.054	10.7372	14.2674	13.2375	12.6392	9.26665	13.9706	11.107	10.5152
SS.CHR2.194	0	0.154982	0	0	0	0	0.396406	0	0.560351	0
SS.CHR2.199	51.1328	51.2793	36.6701	40.501	32.4236	39.1787	40.3392	43.9315	40.7365	46.3029
SS.CHR2.200	8.68157	8.64825	9.62202	4.60744	6.97632	7.72516	6.27666	6.31437	6.39635	6.22035
SS.CHR2.203	2.28174	1.63377	1.70849	0.610105	1.60394	2.17875	1.77275	1.03295	1.5199	1.05425
SS.CHR2.204	5.21198	5.50109	5.23839	6.34077	8.44317	10.3616	7.23903	9.6217	9.62186	7.29311
SS.CHR2.205	7.82308	4.89512	5.18861	3.04007	3.59018	4.41183	3.29354	5.86052	12.0057	4.74374
SS.CHR2.201	13.9738	18.2567	18.3383	13.7002	11.6703	20.6025	14.5162	13.8733	16.934	25.0441
SS.CHR2.202	10.0286	9.8403	10.3497	10.9145	11.0313	8.11103	7.04882	8.5708	8.34881	12.9233
SS.CHR2.206	10.5015	7.70307	4.10543	3.74077	3.50802	7.39864	4.12442	20.7207	8.08503	3.66093
SS.CHR2.208	0.017504	0.010057	0.033798	0.061178	0.060215	0.130772	0.062352	0.023688	0.11362	0
SS.CHR2.207	16.2559	11.4248	9.57764	15.1786	14.6037	14.4088	15.4358	15.5562	15.6982	10.9019
SS.CHR2.210	3.50042	8.2427	8.38545	2.3147	1.61857	7.69994	1.72802	3.98592	13.2554	7.48978
SS.CHR2.209	5.48364	5.6016	5.98529	6.78738	6.99831	6.86021	6.02574	7.01486	6.72263	6.70238
SS.CHR2.212	7.02424	7.78577	6.40074	7.61444	7.58268	8.40741	7.74258	8.47171	5.48991	9.3627
SS.CHR2.219	2.74792	2.97741	3.03712	2.79135	2.88265	2.3133	2.33331	3.92057	3.69129	3.16039
SS.CHR2.213	10.3371	8.52918	6.0182	6.00115	5.02069	8.57923	4.44224	4.65256	6.21999	7.34916
SS.CHR2.214	2.44266	2.97502	2.87129	3.77717	2.20786	3.71193	1.37985	1.36588	2.85739	1.25032
SS.CHR2.215	0.382231	0.274367	0.582116	0.250112	0.921749	0.633176	0.01953	0.188749	0.047112	0.545664
XLOC_066686	1.48513	0	0	0.574	0	0.805815	0	0	0	0
SS.CHR2.217	0.232711	0.130164	0.426603	0.235175	0.047605	0.1968	0.035822	0.119179	0.174281	0.386394
SS.CHR2.220	2.25714	3.37745	3.36031	3.12415	3.54178	2.1866	2.82926	3.58146	4.95562	4.09043
SS.CHR2.221	2.2937	4.62553	2.75859	1.65161	2.00932	1.49064	2.14203	4.8243	0.949856	1.44769
SS.CHR2.225	0.452101	0.566041	0.679105	0.854587	0.772645	1.11812	0.974052	0.575849	0.75424	0.511388
SS.CHR2.226	2.60195	0.791969	4.10691	2.44649	2.27995	1.5153	0.717355	3.77727	2.5907	2.43551
SS.CHR2.222	14.2879	8.09484	9.04795	6.53023	11.3563	9.96264	10.1136	13.9534	9.52896	7.84182
SS.CHR2.223	25.0347	38.2517	32.5393	15.6987	34.3493	25.5966	23.6681	18.4535	25.2837	27.5673
SS.CHR2.224	16.3795	19.7835	21.4853	17.8212	16.6984	16.8088	21.3952	14.1952	16.6562	17.11
SS.CHR2.228	1.6444	1.95983	0.209166	2.70751	2.22496	2.24315	1.17741	0.239878	2.11993	1.67312
SS.CHR2.227	7.30304	4.86206	4.19214	5.55787	5.42682	6.73516	4.43621	3.80405	3.54953	7.07874
SS.CHR2.229	5.09507	1.67127	2.02609	1.21317	1.10651	1.90176	0.623599	1.25383	2.04091	0.642625
SS.CHR2.230	1.95294	1.34815	2.63353	1.05045	1.14162	2.51643	2.21147	1.57861	2.62145	2.42034
SS.CHR2.231	5.63865	2.47484	3.3036	2.74004	2.87243	3.08248	5.61196	4.12658	3.32799	4.51861
SS.CHR2.233	9.47538	17.8399	12.63	22.4058	10.6223	17.6941	22.062	9.54505	14.971	19.6986
SS.CHR2.234	9.87813	10.2313	15.1451	11.1029	13.7473	15.9329	12.8122	13.016	12.5795	13.849
SS.CHR2.235	26.3609	20.2923	31.8336	17.708	28.8612	25.2663	22.2271	25.0896	24.3434	15.6741
SS.CHR2.236	0	0	0	0	0	0	0	0	0	0
SS.CHR2.237	34.912	26.3277	44.0667	22.5695	32.2306	24.74	28.2164	23.9398	29.8444	33.2392
SS.CHR2.238	161.902	197.746	186.897	193.567	229.748	227.38	186.177	176.677	262.659	283.978
SS.CHR2.241	18.2032	15.7261	19.7849	16.8008	26.6518	18.0148	24.2965	16.3721	20.4697	28.3845
SS.CHR2.242	2.45692	3.16155	2.67321	2.94797	2.92098	2.05889	4.76677	2.89402	2.10529	2.21286
SS.CHR2.243	31.1905	30.8947	42.1992	21.2072	26.9746	38.1938	23.7376	32.4279	20.4551	30.781
SS.CHR2.244	28.6725	21.2896	33.3413	28.8199	25.5865	36.2862	24.8082	34.2187	21.1469	27.4678
SS.CHR2.245	32.6012	16.5776	24.334	14.7265	13.5219	15.7481	11.7705	35.0889	11.2892	14.7414
SS.CHR2.246	46.8312	38.9144	42.2098	41.3456	39.3503	38.8631	36.307	45.8604	43.4314	42.0349
SS.CHR2.247	15.3172	15.1097	18.0613	13.6522	18.7476	12.119	14.2127	16.7449	11.8814	15.0808
SS.CHR2.248	31.9023	32.2973	30.5658	24.829	28.3998	39.2804	36.8348	49.5225	100.993	27.0496
SS.CHR2.254	0	0.174453	0	0.14273	0.093776	0	0.227629	0.769641	0	0.089968
SS.CHR2.251	0.372053	0.32296	0.181413	0.505902	0.380385	0.366988	0.277435	0.600767	0.455462	0.962952
SS.CHR2.252	0.127179	0.896427	0	1.24892	0.231745	0	0.271828	0.289747	0.390474	0.175754
SS.CHR2.249	4.36083	2.77856	3.33168	3.72939	4.89342	3.73712	3.91958	4.70414	3.36658	5.11146
SS.CHR2.250	20.9947	21.2071	25.5683	20.89	25.2757	32.0774	18.8559	18.3826	22.0253	26.2705
SS.CHR2.255	3.86732	1.11611	1.39289	1.8601	1.78075	1.2158	3.29837	6.21149	2.06393	2.12548
SS.CHR2.258	1.0907	0.799637	1.46974	1.3295	0.842755	1.92219	1.33185	1.49955	1.08403	1.17517
SS.CHR2.257	0	0.049815	0.629155	1.00794	0	0.087943	0	0.767756	0.341046	0.496735
SS.CHR2.259	26.5231	19.0786	16.9723	23.269	11.4629	20.9701	15.4052	22.7094	23.9666	24.2697
SS.CHR2.260	22.0193	17.1403	13.5985	15.0612	14.189	23.9784	15.8635	17.3159	19.9336	14.6793
SS.CHR2.262	153.782	137.593	119.527	150.189	120.226	117.005	113.891	119.923	177.626	118.895
SS.CHR2.263	35.7651	61.8832	52.77	58.9932	51.1789	45.9625	41.9341	41.2133	55.7789	54.8499
SS.CHR2.264	2.60133	3.51642	4.09417	5.00535	2.9574	2.3185	3.52869	3.3925	3.43743	4.00764
SS.CHR2.265	7.26584	5.56247	5.49635	8.15957	5.15857	7.24192	5.59706	7.00598	6.22808	6.91182
SS.CHR2.267	13.0234	9.01186	15.697	14.862	13.3796	11.6336	8.38921	10.1774	14.5969	9.3558
SS.CHR2.268	22.7089	26.4811	26.4186	17.8158	36.0853	33.1693	20.0394	22.1362	29.1069	23.8473
SS.CHR2.269	0	0.300606	0.071073	0.292155	0.09601	0.376849	0.331661	0	0.384582	0.119939
SS.CHR2.270	9.63738	10.1374	8.4542	15.4447	3.21594	6.60962	5.13249	2.87878	10.1501	10.5893
SS.CHR2.271	5.3882	5.8591	4.67227	6.6376	5.36931	4.91991	6.4183	5.47769	5.52727	5.65084
SS.CHR2.273	0.416594	5.16476	5.56656	0.069099	0.786065	0.867448	1.50108	3.99229	3.16583	1.48106
SS.CHR2.274	0.096668	0.030468	0.335806	0.064231	0	0.261596	0.507368	0	0.057344	0
SS.CHR2.275	0.281677	0	0.077414	0.02028	0.145196	0.017219	0.46189	0	0.018106	0.017838
SS.CHR2.272	9.07267	8.08033	12.4107	8.99523	12.4428	11.5524	7.74252	8.17663	13.3072	10.8204
SS.CHR2.277	0.674847	0.173739	0.199488	0.383746	0.221223	0.278334	0.24697	0.138795	0.027892	0.034891
SS.CHR2.279	0.785938	0.716317	2.95863	1.83385	2.89076	2.66224	0.77134	1.42194	2.93054	1.48002
SS.CHR2.276	13.3491	12.0829	11.8973	10.082	10.2682	16.2162	14.3137	18.244	10.9894	12.5435
SS.CHR2.280	12.3148	17.2741	13.7339	14.8177	13.9581	15.1156	14.4541	12.1454	11.6724	11.6262
SS.CHR2.281	1.02846	1.32544	1.13735	1.6045	1.17604	1.66838	2.32563	1.1733	1.2872	2.21813
SS.CHR2.282	17.9748	22.9748	17.6026	14.5886	20.1845	20.2517	14.787	20.169	18.4524	18.0966
SS.CHR2.283	3.98152	3.94162	4.07429	4.4582	3.71039	3.8986	5.22069	5.22845	5.0841	3.62426
SS.CHR2.287	1.42645	1.6437	1.78028	0.913391	1.80141	0.070188	0.173703	1.22405	0.258907	0.398335
SS.CHR2.284	2.20644	0.720216	1.15913	1.90749	1.33505	3.08233	0.640884	1.46499	1.3034	1.46049
SS.CHR2.286	1.62192	1.11968	1.13163	0.507325	1.56341	1.74605	0.56011	0.558406	0.396917	0.682371
SS.CHR2.288	4.76666	4.32816	4.95671	7.80626	1.94694	5.85317	4.89738	6.80238	5.84605	5.57635
XLOC_066775	74.3265	12.6557	70.4667	67.7993	65.8774	58.3592	11.0611	81.4822	75.4893	93.6446
SS.CHR2.291	1.31711	1.0706	0.260051	0.349503	0.592832	0.571231	0.693258	0.272644	0.657705	0.75225
SS.CHR2.289	15.6929	13.8952	16.8229	16.8767	12.9043	17.4088	14.321	15.4572	16.8043	19.4364
SS.CHR2.290	7.4427	8.77523	11.5715	10.6627	9.3033	9.87334	9.12388	9.10854	5.60273	8.38892
SS.CHR2.292	5.81918	3.94118	5.45632	7.38331	4.63851	4.18649	7.27805	8.312	6.71588	8.72896
SS.CHR2.293	5.76498	3.38846	4.92848	4.37907	3.56167	4.93522	4.25794	3.35656	3.95543	4.38142
SS.CHR2.295	12.2014	16.9958	30.6236	11.7745	41.4134	23.3263	14.3714	15.0023	19.9433	17.2349
SS.CHR2.294	89.8294	96.3379	89.7891	69.6655	102.908	91.5148	101.978	85.7273	94.0421	119.928
SS.CHR2.298	8.09804	6.61831	7.62835	7.33303	7.70469	8.40234	7.59853	7.98705	5.53848	6.70501
SS.CHR2.300	3.52922	3.81632	1.53942	2.52753	3.62524	1.93763	3.67335	2.98431	4.21647	3.29326
SS.CHR2.301	0.728542	1.97513	1.52419	0.94942	2.19301	1.21239	1.8694	1.94502	1.31361	1.12444
SS.CHR2.299	12.7401	13.0018	20.1709	9.47407	10.0069	9.1017	9.67039	12.2507	7.89339	12.2904
SS.CHR2.302	0.537542	0.335899	0.525069	0.658753	0.63515	0.501583	0.750518	0.187513	1.01151	0.640869
SS.CHR2.303	22.1462	17.9461	23.3657	24.8594	22.1769	26.3485	25.9554	33.5786	21.794	30.7176
SS.CHR2.304	22.512	25.27	26.6535	14.8927	21.1015	14.5077	16.2787	26.8287	30.5192	16.2182
SS.CHR2.307	0.136108	0	0.224832	0.034027	0	0	0	0	0.00162	0.034546
SS.CHR2.308	0.37455	0.134025	0.035979	0	0	0.19027	0.067158	0	0.355541	0.066229
SS.CHR2.305	4.52149	3.68734	6.65016	7.82593	4.40815	2.6191	4.63768	5.72727	2.25922	6.07975
SS.CHR2.306	0	0	0	0	0	0	0	0	0	0
SS.CHR2.309	8.90445	9.01126	9.05075	7.86333	8.84319	9.3069	7.25679	9.4062	8.38978	7.91031
SS.CHR2.310	15.1211	7.98949	16.1654	9.75863	14.4458	8.4132	3.14655	7.51283	1.65427	4.03122
SS.CHR2.312	0.061934	0.167118	0.108175	0.119131	0	0.3929	0.182528	0.238532	0.081003	0.091499
SS.CHR2.311	10.1197	9.41092	12.0787	11.4976	13.0781	7.49317	17.2181	18.1463	10.3206	9.40851
SS.CHR2.313	132.86	131.156	131.536	215.236	103.196	153.741	139.661	146.355	90.9639	141.323
SS.CHR2.314	43.3134	28.8931	24.8932	33.8329	45.9303	27.9885	30.7816	40.6804	20.9299	28.1203
SS.CHR2.315	1.26571	1.56822	0.978198	0.785351	1.10624	0.517164	0.315808	1.27256	22.1183	2.05909
SS.CHR2.316	9.52302	7.45394	10.2177	6.85316	9.75718	11.2419	9.8538	6.47931	10.0059	7.10128
SS.CHR2.321	4.23642	4.43359	3.64923	1.50475	0.641115	1.62605	3.05456	1.4273	4.62325	3.55046
SS.CHR2.317	16.4707	17.6031	15.2701	17.0837	17.6408	17.7198	14.3431	20.9011	17.2567	16.6729
SS.CHR2.322	1.11039	0.312795	0.176186	0.625909	0.333251	0.264681	0.578561	0.352648	0.115667	0.469566
SS.CHR2.323	1.03508	1.87153	8.52456	0.445856	2.19052	3.09247	1.83621	2.83542	1.31417	2.10489
SS.CHR2.324	2.12686	2.10653	2.24323	1.65009	2.25315	2.23564	1.18668	2.51759	2.27227	1.81005
SS.CHR2.329	0	0	0	0	0	0	0	0.088987	0.230769	0
SS.CHR2.328	0.137009	0.071816	0	0.05959	0.106929	0.167307	0.177714	0.507633	0.162655	0.222412
SS.CHR2.326	0.498162	0.563805	0.397594	0.277623	0.059574	0.892407	0.445147	0.094218	0.748487	0.431006
SS.CHR2.332	0.033181	0	0	0	0	0.039189	0	0	0	0
SS.CHR2.330	0.680725	0.640617	0.343841	1.7686	0.367044	0.504876	0.611074	1.45779	0.95468	2.94622
SS.CHR2.325	6.95408	8.50111	10.4979	8.09849	7.72194	12.1486	9.62032	10.6571	9.65844	8.26616
XLOC_066823	21.578	53.2061	16.7505	39.818	37.5593	26.1324	25.1212	35.2572	58.547	24.4413
XLOC_066824	4.24579	7.5475	6.74671	7.21112	11.1011	8.65822	4.9514	7.72196	14.052	7.22698
XLOC_066831	0.412057	0.742101	0.594276	1.07765	1.28344	0.982298	0.264646	0.266487	1.03367	1.37297
XLOC_066833	3.04362	4.70662	3.58891	5.15569	4.03075	1.76812	4.61268	4.8363	16.7316	3.92332
SS.CHR2.337	0.085008	0	0	0.110725	0	0.064391	0	0.049687	0.048438	0
SS.CHR2.338	0.787369	0.465141	0.341897	0.409945	1.01612	0.509543	1.85275	1.02943	1.48665	1.86848
SS.CHR2.336	2.5485	2.78422	2.87954	1.29659	4.97906	2.70725	2.55103	2.18944	3.06916	1.66365
XLOC_066837	7.73719	4.28335	5.46546	4.35954	3.56116	4.36985	3.74285	4.2005	4.10521	4.98114
SS.CHR2.342	5.81579	4.86221	4.90435	6.42303	5.63669	3.9055	6.07211	3.96107	5.00244	5.39183
XLOC_066830	357.106	296.529	193.081	307.303	176.015	185.19	182.444	295.256	375.096	276.079
SS.CHR2.334	3.28968	4.00121	5.64285	4.45671	3.83802	3.12001	2.04066	4.08942	6.19876	1.61669
SS.CHR2.343	16.4863	11.2854	8.69044	7.59487	11.6576	8.50833	12.6547	12.6554	10.7527	13.8356
SS.CHR2.344	0.790847	0.565823	0.555474	0.25088	0.836995	0.45055	0.490305	1.12087	0.784955	1.05254
SS.CHR2.346	7.39068	12.0452	0	0	8.56181	2.75518	6.43331	13.7584	0.419651	6.28848
SS.CHR2.348	4.55125	4.60366	8.82977	1.74677	3.72598	2.37442	4.20037	2.45282	6.00811	7.66249
SS.CHR2.347	6.55749	5.67411	7.32793	5.04829	6.91503	8.20896	7.64901	5.56888	4.164	5.8328
SS.CHR2.345	22.5972	14.3992	19.048	22.0244	17.479	24.1676	14.7326	17.9824	21.7591	25.9468
SS.CHR2.349	7.52691	6.74455	6.81986	6.0726	6.45853	7.50947	5.69177	6.37961	6.56236	5.69167
SS.CHR2.351	1.99344	0.565322	0	1.96791	1.35141	0.849263	1.33346	0.880368	1.78085	0.448551
SS.CHR2.353	0.57209	0.921088	1.14405	0.698408	0.716655	0.383364	0.673991	0.084892	2.0055	0.537788
SS.CHR2.352	29.0058	37.1761	27.4562	35.7365	30.9541	22.4299	29.2475	25.4457	35.6429	31.1019
SS.CHR2.354	10.9184	15.4261	21.0677	22.0095	2.93327	9.11504	6.26149	19.3087	15.1071	4.71967
SS.CHR2.356	5.71376	3.4775	4.67618	5.67289	4.66173	4.52754	4.99896	7.14304	4.84204	3.12605
SS.CHR2.357	5.93792	5.22378	8.25679	5.66277	6.18261	5.85104	6.67558	6.0874	6.57458	6.6175
SS.CHR2.359	6.60205	7.63415	8.28853	9.11507	9.94411	11.186	9.60301	6.88454	7.90413	9.11844
SS.CHR2.364	0.131025	0.638546	0.332782	0.262406	0.7431	0.314962	0.26565	0.336232	0.333432	0.071005
SS.CHR2.363	2.24375	3.4044	3.41582	2.60345	3.39264	4.97023	4.13734	5.43252	4.46134	3.3921
XLOC_066856	4.66118	1.62481	6.46199	6.12975	3.01347	2.52043	6.0485	2.41275	4.96972	4.83469
XLOC_066858	1.66934	0	1.48267	2.484	0.928679	0.86974	2.24972	1.23517	2.22913	2.53468
SS.CHR2.366	0.336842	0.141114	0.239829	0.218977	0.139993	0.370127	0.061355	0.222242	0.319538	0.039753
SS.CHR2.365	11.6789	5.8883	22.5694	15.8966	22.8211	16.1809	23.7474	10.5258	5.6267	8.77494
SS.CHR2.360	18.6371	16.0385	14.1639	15.6345	15.4983	15.512	14.4456	18.981	15.772	13.3995
SS.CHR2.361	0.258163	0.077855	0.094315	0.278712	0.08529	0.206292	0.183915	0.449816	0.263391	0.497301
SS.CHR2.362	11.2897	6.09069	6.37915	6.69768	9.9795	4.61891	5.43269	3.92847	9.07192	6.6055
SS.CHR2.368	1.25702	0	4.25176	0.3063	9.829	0.564492	0.223124	0	0	0
SS.CHR2.367	15.5734	23.8441	25.7874	31.1609	27.9628	24.5853	21.9457	23.6116	31.7497	29.2996
SS.CHR2.369	6.77647	1.06228	2.97354	3.56	1.75745	3.04677	2.29149	0.665815	1.44975	1.99606
SS.CHR2.370	28.8204	4.86047	15.8415	12.1579	8.46916	16.4598	9.47597	2.03667	6.45282	11.5522
SS.CHR2.373	0.774744	0.526195	0.210025	0.193766	0.365818	0.413565	0.655953	0.557376	2.46747	0.476439
SS.CHR2.372	111.285	86.1249	93.732	188.66	82.4817	134.299	89.4846	120.206	137.557	107.942
SS.CHR2.374	7.4729	6.58014	7.30732	12.6072	7.92513	6.41177	5.994	7.0808	8.5553	7.67707
SS.CHR2.375	5.09343	4.65211	3.64308	5.77319	3.81351	3.65195	2.03545	6.59394	6.45901	9.27322
SS.CHR2.376	5.51738	5.67908	6.21167	9.26139	6.03258	5.75638	5.02038	5.84061	6.62904	8.32402
SS.CHR2.377	32.783	36.7654	41.0597	38.5168	36.677	37.504	47.2036	40.8122	34.7083	42.6246
SS.CHR2.379	10.0645	8.7731	7.14444	8.82735	7.51197	7.27967	6.0955	8.31823	9.58258	7.17829
SS.CHR2.380	135.934	207.392	181.29	137.375	176.814	161.335	165.367	147.379	156.537	186.855
SS.CHR2.382	0.812659	0.08	0.209641	0.042304	0.429746	0.201897	0.971182	0.217804	0.037768	0.148794
SS.CHR2.381	7.06066	8.55756	10.8708	8.95477	4.39768	7.87463	5.2084	7.8977	4.43397	5.7877
SS.CHR2.383	35.2189	23.8722	15.2125	18.31	38.0217	38.2146	52.6053	37.0271	8.80095	11.6436
SS.CHR2.384	7.47311	6.57496	8.38916	5.18947	8.53189	8.73433	5.72928	8.24706	7.4007	5.91662
SS.CHR2.387	0.078983	0	0.279524	1.0008	0.597295	0.306829	0.832207	0.636075	0.211401	0.249393
SS.CHR2.386	0.572946	0.382401	0.647305	0.391805	0.61516	1.10202	0.557082	0.740142	0.597244	0.314138
SS.CHR2.388	0.525465	5.88471	5.27728	7.01743	4.38051	1.29175	4.95323	0.912575	10.7463	1.90939
SS.CHR2.389	0	0.081948	0	0	0	0	0.059389	0.065106	0.231907	0
SS.CHR2.390	0.1192	0	0	0	0.089696	0.205392	0.262265	0.19811	0.180517	0.024204
SS.CHR2.391	0.482833	0	0.282383	0.242733	0.528999	0.509522	0.231618	0.637004	0	0
SS.CHR2.392	1.40005	1.29523	1.55139	0.890302	1.7839	1.54335	0.851017	1.19809	1.69238	1.18605
SS.CHR2.393	4.72976	2.65054	3.06776	3.35083	3.39338	3.03199	2.87746	3.11876	3.21869	3.22046
SS.CHR2.395	19.1262	13.0208	17.0395	14.3686	15.8406	17.3248	16.7996	20.2871	13.9644	13.4056
SS.CHR2.397	2.17986	1.94318	5.47036	5.23397	5.91754	6.53441	2.64579	0.878937	25.4183	1.71905
SS.CHR2.396	29.7022	22.8036	22.9252	24.5923	22.8385	23.1292	24.0711	21.292	22.4898	24.6399
SS.CHR2.400	0.976142	0.144775	0.656403	0.61241	0.644057	0.080103	0.224024	1.12908	0.189827	0.768595
SS.CHR2.401	8.36895	8.01576	10.9413	5.43997	8.59125	7.17898	5.23398	6.2642	173.753	18.7877
SS.CHR2.398	9.35639	16.3535	11.6845	12.3664	11.5409	12.6573	9.74424	12.5895	19.5526	15.5199
SS.CHR2.399	10.5016	11.332	8.8674	8.44039	13.09	10.6881	10.3399	12.1293	11.096	11.1743
SS.CHR2.402	6.0032	3.54577	3.12969	5.74829	2.90293	3.55382	5.09627	2.74517	8.01001	2.23874
XLOC_069458	7.55052	1.43288	2.25923	3.05576	6.37331	11.1814	11.841	4.11969	4.90354	6.56828
SS.CHR2.404	12.6794	11.2189	9.33546	12.0397	9.56009	12.0383	10.1944	9.91559	12.3178	12.3632
SS.CHR2.410	0.162092	0.178126	0.237704	0.215762	0.288066	0.188422	0.610662	0.096902	0.108453	0.109345
SS.CHR2.408	3.39793	1.79147	2.69645	2.45651	2.18116	2.34788	2.39567	2.65556	1.51195	2.87199
SS.CHR2.406	0.190795	0.228389	0.288268	0.238931	0.169734	0.333145	0.224329	0.396239	0.525054	0.278526
SS.CHR2.405	30.3691	27.6677	29.1192	30.1209	28.6039	30.9876	24.4473	34.6374	28.3095	34.3996
SS.CHR2.407	0.328065	0.581915	0.205681	0.125356	0.363314	0.619943	0.230611	0.354393	0.528173	0.281339
SS.CHR2.411	29.7489	11.9816	16.7277	18.0258	10.057	23.1595	17.3228	41.128	12.4192	11.7921
SS.CHR2.412	11.7819	5.42892	7.49397	5.8264	4.25106	12.6988	4.5751	9.70651	8.37584	6.41653
SS.CHR2.416	0.12917	0	0	0	0	0	0	0	39.1398	56.7597
SS.CHR2.415	2.20333	2.38937	1.50241	3.19108	2.41234	1.62395	3.04594	1.63837	10.6074	17.4031
SS.CHR2.417	7.96663	17.3287	12.1114	10.1827	12.0799	11.2732	8.7471	12.0538	49.0307	39.1622
SS.CHR2.413	44.4977	37.7855	33.6154	39.9054	35.7725	35.29	35.7565	52.2721	51.6969	50.6404
SS.CHR2.414	0.280541	0.128642	0.50862	0.136697	0.246414	0.178728	0.027209	0.144463	0.193034	0.106392
SS.CHR2.418	8.76036	8.38738	15.525	7.00873	13.9973	8.05269	7.98276	7.32141	15.4626	4.22349
SS.CHR2.419	6.41062	3.72776	4.9617	4.97452	3.55276	4.34131	3.71325	2.21579	4.31927	4.95492
SS.CHR2.422	0.4615	0.222561	0.386417	0.054486	0.887818	1.33843	0.610962	0.898628	0.108314	0.977841
SS.CHR2.423	0.402881	0.218023	0.679269	0.093172	0.408959	0.284376	0.410078	0.020986	1.12484	0.484666
SS.CHR2.421	2.00613	3.66295	2.7325	2.78569	2.71334	2.91591	3.04047	3.40117	2.6742	3.59483
SS.CHR2.420	0	0	0	0	0.043836	0	0.044351	0.038728	0.153972	0.651468
SS.CHR2.424	1.60336	1.41416	1.48362	1.29987	2.0528	2.44664	0.965849	1.63826	1.26736	1.52683
SS.CHR2.428	1.07825	1.79235	1.38283	2.55231	1.28232	1.70525	2.46118	3.63431	1.33073	2.47641
SS.CHR2.427	0.498604	0.90036	0.743823	1.73807	0.330112	1.93294	1.8363	1.13435	2.04075	0.693871
SS.CHR2.425	13.7323	12.6264	12.7073	11.6705	13.4616	12.3142	12.399	18.3522	11.9291	13.6268
SS.CHR2.426	0.787315	0.836488	1.35057	0.694883	0.770451	1.36877	0.730017	1.0529	1.93926	0.88599
SS.CHR2.433	0.282089	0	0	0	0	0	0	0	0	0
SS.CHR2.434	0.379694	0.057893	0.169584	0.061022	0.450834	1.19867	0.690526	0.31399	0.239041	1.03986
SS.CHR2.436	3.37797	2.57036	2.18083	4.75066	4.30422	8.16447	6.45751	1.37833	4.83046	8.77407
XLOC_069490	30.7281	31.5282	20.4057	31.9771	33.4628	14.3314	19.6477	26.058	23.5993	26.1801
SS.CHR2.431	1.16736	0.851689	1.1827	0.826841	1.54082	1.57442	1.49592	1.17448	1.17222	1.38163
SS.CHR2.432	0.844739	1.66775	1.92682	0.634582	2.05027	2.31007	1.61254	0.829748	0.878186	1.487
SS.CHR2.444	1.54867	0.867763	0.653317	0.728702	0.325055	0.765754	1.46639	1.17793	0.696305	0.893348
SS.CHR2.445	0	0	0	0	0	0	0	0	0	0
SS.CHR2.446	0.733795	0.693954	0.510543	0.472611	0.260764	0.348151	0.615575	0.93822	0.654877	0.928622
SS.CHR2.440	22.827	50.3342	45.2943	40.7893	37.0062	38.517	41.5876	45.7774	45.3318	44.5602
SS.CHR2.447	9.1764	7.8033	8.5165	9.32067	6.40072	9.70865	6.62529	9.64852	11.0295	8.32371
SS.CHR2.448	36.9088	15.0862	46.579	19.0638	29.5269	17.6067	52.4712	3.64769	9.72839	12.6269
SS.CHR2.450	10.6664	21.3666	16.9962	30.1775	10.6658	13.6791	11.9783	11.1797	16.7356	21.413
SS.CHR2.452	0.547574	0.678935	1.35992	0.783971	0.86348	0.792715	0.700058	1.25646	1.00582	1.2245
SS.CHR2.451	16.3902	21.5716	22.9193	16.4167	23.1574	23.8553	21.4041	19.7472	22.5539	25.1496
SS.CHR2.457	8.70641	8.33107	12.2821	7.48967	8.78115	7.54056	7.93546	8.58123	7.66058	9.08011
SS.CHR2.453	41.2646	44.503	42.0642	32.9083	38.9462	51.1542	37.5665	41.7482	33.6887	38.1685
SS.CHR2.454	2.16154	5.03619	5.41818	5.63491	4.57635	5.80145	5.67321	2.4717	3.38793	3.5614
SS.CHR2.455	3.66878	2.68765	3.31214	3.32731	3.1389	4.32105	3.56513	4.07462	3.10467	3.64703
SS.CHR2.456	55.3038	41.9726	36.0837	27.4027	51.741	36.9144	41.0644	41.5838	54.548	52.0408
SS.CHR2.459	0.838415	0.574918	1.14252	0.938218	0.871802	0.621485	0.871351	0.578358	0.499349	0.663098
SS.CHR2.458	10.6052	7.96137	8.61496	9.12357	9.82611	9.02579	7.33402	12.2884	12.4583	11.3777
XLOC_066943	2.35358	2.98792	2.81546	3.00125	2.54472	3.66607	2.6725	3.04783	2.63191	3.18054
SS.CHR2.460	0.058842	0	0	0	0	0.04344	0.076772	0.827376	0	0
SS.CHR2.463	0.036948	0.30125	0.249845	0.103735	0.262235	0.515683	0.545247	0.373977	0.518201	0.153788
SS.CHR2.464	22.0229	45.8544	42.754	35.1365	42.0602	34.4734	37.708	19.9036	31.2728	22.5009
SS.CHR2.462	102.811	99.5913	115.864	134.411	79.9006	84.8798	96.119	110.962	143.338	134.062
SS.CHR2.465	42.8093	38.812	39.4316	38.9751	39.1328	32.173	43.9382	42.8603	44.9804	35.8481
SS.CHR2.466	12.9576	10.0985	8.96666	9.14156	9.22349	10.3703	8.20939	12.9724	9.77694	9.63277
SS.CHR2.467	13.5823	11.0139	10.5797	13.1334	12.6023	14.3871	12.3647	11.9133	10.3587	11.6653
SS.CHR2.468	25.4668	22.0722	19.6796	19.5502	24.601	22.1644	18.7267	26.0351	29.0492	18.8433
SS.CHR2.472	5.88299	4.18924	5.22527	0.293662	1.07226	0.071437	0.315023	1.04478	0.473831	0.571803
SS.CHR2.474	12.4741	9.04076	12.3812	11.9149	12.2775	11.8798	11.9456	12.6442	9.49427	8.61916
SS.CHR2.477	0.505822	1.58029	1.75551	0.785428	0.858975	0.760439	0.873504	0.915525	0.984265	1.08601
SS.CHR2.475	1.23427	0.768593	0.930213	0.953837	0.984525	0.712824	1.12727	0.753269	1.19078	0.810417
SS.CHR2.476	24.0594	18.5217	13.3596	17.8465	13.825	22.9831	12.7471	15.6449	12.9135	13.5108
SS.CHR2.478	39.3809	27.685	25.4766	28.6894	32.875	30.1266	26.4345	35.2574	30.3733	30.168
SS.CHR2.479	48.0435	45.5728	48.5993	44.1918	47.9027	48.9339	43.1976	48.0424	40.9185	40.7165
SS.CHR2.482	4.92881	3.07644	4.48312	3.33245	3.29993	3.85254	3.91721	4.43539	4.3655	5.15311
SS.CHR2.483	11.8301	12.4475	17.9286	10.2645	13.8727	15.0632	13.9706	10.6158	10.7887	8.9805
SS.CHR2.484	5.50736	4.37305	4.70423	4.47669	6.05122	3.94738	5.21973	4.50308	3.91619	5.18745
XLOC_069543	0.609388	8.1219	5.23658	7.60336	8.32202	10.9763	7.20455	4.85273	25.5086	7.04739
XLOC_069539	3.81363	2.34223	10.7889	7.58342	0.603757	7.18897	0.869309	0.718909	3.11429	1.38163
XLOC_069545	3.03062	7.68183	5.59471	7.8901	8.84815	12.5093	10.7711	8.14372	10.5649	1.5669
SS.CHR2.488	8.67599	5.74046	12.1625	7.47501	7.533	7.88065	6.21741	5.47632	19.1094	5.75607
SS.CHR2.489	16.2902	8.62392	17.6234	11.9752	10.4233	12.5249	9.78082	9.74122	31.9643	9.87338
SS.CHR2.490	14.7292	12.5468	12.7576	14.4551	11.7738	12.2449	10.1348	13.4381	13.5381	13.8034
SS.CHR2.491	1.23807	2.59328	0.34956	3.14505	0.561561	0.430434	0.388304	0.710434	1.72708	1.5146
SS.CHR2.492	1.36591	4.93748	1.8032	3.2284	1.28869	1.34225	2.04232	3.20733	2.52523	3.27554
SS.CHR2.493	0.497227	0.80561	0.772223	4.4166	0.313375	0	3.77087	1.04843	2.79483	1.03877
SS.CHR2.494	2.00052	1.80824	3.45792	1.86782	2.7163	1.88162	3.11063	1.18636	7.79316	2.5836
SS.CHR2.498	3.03565	0.029885	0	2.61738	1.85552	1.57424	3.09448	1.34808	0.724443	1.07875
SS.CHR2.495	11.9049	18.4969	4.14122	5.74607	9.60545	19.4154	3.78379	5.50345	18.0978	4.51655
SS.CHR2.496	0.608267	0.630274	0	0	0.558109	0.678711	0.450736	0	0.703755	0.388484
SS.CHR2.497	0.437929	0.309673	0.305709	0.093574	0.999377	0.408495	0.096815	0.292255	1.0916	0.518083
SS.CHR2.505	6.64488	5.4633	3.89068	4.87833	3.97195	4.49902	4.7122	4.74845	8.24591	5.30847
SS.CHR2.504	0	0.034491	0	0	0.110923	0.233209	0.074858	0.065477	0	0.110118
SS.CHR2.499	58.0998	58.1362	66.3969	63.7801	48.2408	43.543	53.4096	53.0337	42.7705	44.4294
SS.CHR2.500	2.35216	2.88825	0.753327	0.729429	0.780653	5.40957	3.9488	1.74221	0.53305	3.02414
SS.CHR2.501	5.38309	8.19001	7.91352	9.71387	13.9458	7.16012	16.6489	4.69456	13.9923	19.0549
SS.CHR2.502	42.5812	54.6572	52.1331	108.64	42.3208	45.266	35.9957	43.2185	70.0566	27.2697
SS.CHR2.503	22.0286	18.9403	26.1661	22.0299	26.4219	23.4513	24.4012	28.5997	24.8449	21.6112
SS.CHR2.506	14.387	17.5289	26.6084	44.5439	21.8314	25.0838	36.8211	16.4371	31.3807	41.812
SS.CHR2.507	0.25974	0.116912	0.149758	0.910549	0.264192	0.215717	0.187127	1.60065	1.97443	0.364072
SS.CHR2.508	20.3337	20.1711	23.1643	17.0142	19.6417	17.0861	14.8769	21.0004	27.6132	4.0663
SS.CHR2.510	0.071201	0	0	0	0	0	0	0	0	0
SS.CHR2.509	3.66041	3.91322	5.69358	0.765751	2.41356	5.24734	2.88791	1.30487	1.82796	1.22275
SS.CHR2.511	3.31362	2.88197	3.16003	3.56526	3.69814	4.63821	3.68393	2.77531	3.42157	4.30098
SS.CHR2.516	0	0.063587	0.09157	0.05763	0.04973	0.035366	0.072721	0.129686	0.096301	0.16651
SS.CHR2.517	0.257347	0.24333	0	0.308952	0.186111	0	0.394655	0.098984	0.459287	0.373126
XLOC_067011	0.739907	0.189043	0	0.254502	0.454312	0	0.374712	0.281239	0.353531	0
SS.CHR2.514	65.68	103.794	68.3621	68.392	94.6731	119.259	87.0926	86.5302	92.0622	74.2453
SS.CHR2.515	2.05637	2.79099	2.07595	2.78103	1.80963	2.96165	2.90146	2.24938	2.44479	2.95085
SS.CHR2.521	0.300714	0.555577	0.556937	0.527878	0.514864	1.44538	0.637476	1.81678	0.275414	0.783134
SS.CHR2.520	4.23948	5.0273	3.89393	4.41492	5.07848	3.13321	4.57868	3.37339	3.56335	3.3884
SS.CHR2.522	6.53312	3.15589	2.67935	3.29831	3.63408	3.5277	2.90033	3.40684	3.58087	3.98156
SS.CHR2.523	15.7302	11.5355	14.4743	8.41711	10.5758	16.4484	9.42007	13.2496	11.6103	9.35541
SS.CHR2.524	6.21293	9.95737	6.25303	5.26711	9.78614	7.12462	6.97988	8.98268	3.76603	6.96592
SS.CHR2.526	4.11299	3.61268	3.63634	3.74395	3.33418	3.08116	2.85977	2.38832	4.11306	4.03939
SS.CHR2.527	7.44905	3.83054	6.6083	5.90644	6.61107	5.42055	4.94496	7.06558	6.21075	4.78055
SS.CHR2.529	2.52526	2.78002	2.34774	2.08308	1.79499	1.80654	2.44361	1.80681	2.26331	2.06153
SS.CHR2.531	10.6472	14.6128	15.006	11.9856	10.6497	13.0178	15.1364	16.6837	11.5849	9.66875
SS.CHR2.530	10.037	10.7282	9.68525	11.0456	9.4957	10.1546	10.2491	11.9262	8.96426	11.7449
SS.CHR2.533	3.41009	4.39438	3.25082	2.32876	7.00032	3.48715	5.22206	2.90005	3.68738	2.49807
SS.CHR2.534	0.626093	0.286381	0.489599	0.294309	0.418966	0.603586	0.649805	0.362011	0.279977	0.223441
SS.CHR2.535	0.688489	0.790017	0.953611	0.64986	0.804169	0.985683	1.39278	0.618365	0.697839	0.914287
SS.CHR2.532	3.68595	3.66138	2.96017	2.72754	2.31384	2.71861	4.06378	2.96018	3.3065	3.05641
SS.CHR2.536	7.74209	10.8675	25.3484	0.964265	6.23012	6.02226	4.48754	6.57724	6.75495	5.94675
SS.CHR2.537	14.2322	11.7212	14.5872	13.8737	6.59441	10.1932	7.67107	19.0767	14.8359	11.1939
SS.CHR2.538	1.74998	0.06934	0.714137	0	0	0.281558	0.075624	0	0.842589	0.074703
SS.CHR2.539	5.33156	10.0159	6.17873	6.61232	4.36922	6.49141	4.96234	4.32325	7.63741	6.74543
SS.CHR2.541	3.17468	9.54502	6.876	0.649929	10.6289	1.12878	8.58711	9.36805	3.97122	0.888201
SS.CHR2.540	8.16608	10.1028	9.06759	6.77912	7.09828	8.61406	7.88017	9.30771	8.55401	8.56704
SS.CHR2.542	45.8467	18.3329	41.9291	20.0189	37.2085	46.745	21.6957	37.4512	21.2221	25.4242
SS.CHR2.543	3.37943	1.07479	2.64717	1.00104	4.48176	2.16859	1.61168	0.478071	2.53678	2.77725
SS.CHR2.545	4.99908	5.68078	4.93601	6.84777	4.47633	4.85511	4.46528	5.08637	5.54353	5.77641
SS.CHR2.546	30.3067	90.8776	32.1883	9.81746	40.2103	37.782	81.993	17.9389	59.3068	60.1793
SS.CHR2.547	2.79403	1.18048	2.84047	2.16277	2.13769	2.10134	1.3343	3.76519	1.51249	1.56884
SS.CHR2.548	10.0244	7.58496	9.20491	8.89942	8.91562	10.3108	5.89987	9.91376	10.323	7.544
SS.CHR2.552	0.200524	0.10601	0.185407	0.111576	0.314227	0.12901	0.04497	0.190745	0.093292	0.034171
SS.CHR2.551	1.09247	1.75127	3.3896	2.17313	3.05458	2.94891	2.02159	1.52747	1.69815	1.74798
SS.CHR2.549	56.4784	36.605	87.3958	53.3417	68.5879	43.1722	50.3314	40.7323	40.9541	38.45
SS.CHR2.550	7.62903	4.2724	8.44006	6.07424	9.32834	8.22757	5.20467	5.7977	6.47043	4.10896
SS.CHR2.560	0	0.060296	0.140451	0.154182	0	0.140462	0.116777	0.689698	0.14195	0.045229
SS.CHR2.561	0.377687	0.469234	1.16029	0.732704	0.478859	0.77576	0.609537	1.14565	0.543498	0.719031
SS.CHR2.554	2.78877	0.321535	1.78105	0.759062	2.12289	1.93412	2.17318	3.01748	0.290723	1.8147
SS.CHR2.555	0	0.210201	1.11314	0	0.481653	0	0.14232	0.251093	0.210163	0
SS.CHR2.556	2.18247	0.39557	1.27148	0.281521	0.406532	0.637363	1.50775	2.53755	0.179974	1.38229
SS.CHR2.557	45.3663	0	23.4522	15.3274	18.9226	23.1803	21.31	20.453	0	19.1284
SS.CHR2.558	4.22907	4.27176	4.46728	0.780606	3.74556	3.49505	5.30903	4.8129	2.52325	1.99591
SS.CHR2.559	1.61361	0.498728	1.05587	0.492117	1.0395	0.938643	2.40313	2.02552	0.109305	0.542688
SS.CHR2.562	24.8985	29.7146	31.058	36.8084	22.4736	21.2472	28.9243	30.4116	25.8956	31.3216
SS.CHR2.563	24.2799	28.5515	16.4892	43.3809	20.956	15.2021	29.338	27.3976	28.9996	30.0391
SS.CHR2.564	19.3194	22.5966	13.6604	23.426	16.1771	15.7357	20.7917	18.8626	18.1877	19.3454
SS.CHR2.566	4.85009	2.86442	1.52181	0.658971	2.58488	1.51091	3.27428	6.80807	2.05971	2.80367
SS.CHR2.565	15.6099	21.7013	10.4386	19.7332	17.4006	17.6145	16.395	13.0277	18.2003	17.6136
SS.CHR2.568	0.735138	0.250237	0	0.288617	0	0.119865	0.190025	0.037146	0.199982	0.077162
SS.CHR2.567	76.297	81.7193	63.3446	35.8854	68.2029	77.4557	81.4632	63.8253	78.3389	73.4617
SS.CHR2.571	1.17909	1.36369	6.77435	1.3895	1.42191	1.52576	0.152116	1.06728	3.90959	3.45238
SS.CHR2.572	0.134349	0	0.058733	0.021362	0	0.171424	0.016912	0	0	0.021688
SS.CHR2.573	0.186804	0.150607	0.32215	0.124675	0.042453	0	0.032528	0	0.074364	0
SS.CHR2.574	0.461608	0.349133	0.169107	0.121984	0	0.487603	0.09514	0.082027	0.137095	0.031327
SS.CHR2.577	0.152177	0.184177	0.131629	0.023716	0	0.054983	0.174117	0.031927	0.052932	0.055459
SS.CHR2.576	8.82579	9.98745	5.24381	7.05891	8.36819	9.04145	8.62969	7.21081	5.90471	8.62212
SS.CHR2.578	3.18607	2.64869	2.88464	3.51212	3.16219	3.53072	2.84584	3.95423	2.91597	3.19042
SS.CHR2.579	24.7736	21.9026	31.5074	29.8062	46.4668	21.5049	54.8163	30.0569	14.5991	29.6859
SS.CHR2.581	0.155549	0.636469	0.372988	0.025711	0.354086	0.267344	0.361265	0.023075	0	0.328065
SS.CHR2.580	8.1113	9.76837	8.80404	6.97367	9.93834	11.9612	6.46514	7.91591	8.80994	8.75322
SS.CHR2.583	4.79843	9.95104	9.025	6.89647	9.91138	11.7837	5.39234	5.86836	6.95144	8.24935
SS.CHR2.584	7.39905	8.15576	7.85418	8.04353	7.98928	6.6725	7.84048	7.47037	8.36714	8.83559
SS.CHR2.585	2.32988	2.09081	4.65601	0.677134	6.98128	3.60934	6.86464	2.9453	1.55641	2.12393
XLOC_069657	21.1979	25.8401	22.4505	18.228	22.6735	14.2292	23.6623	20.1927	23.6454	22.0695
SS.CHR2.587	7.52246	7.78729	8.86638	3.43366	2.32308	4.15972	3.46538	7.91548	4.85228	2.59353
SS.CHR2.589	79.6036	112.783	83.0652	192.443	81.998	53.3229	90.517	102.332	75.3373	95.5824
SS.CHR2.591	0.108757	0.063375	0.083024	0.072335	0.773497	0	0	0	0.055483	0
SS.CHR2.590	3.03249	2.8739	2.87545	2.55009	2.99266	3.91577	2.50448	4.61885	3.63292	2.29552
SS.CHR2.595	0.702406	0.487574	2.46075	1.18432	4.27702	2.4987	3.61307	0.941002	2.88916	1.69228
SS.CHR2.592	7.59539	5.72721	5.60948	5.63241	6.75246	6.73193	5.98893	7.30476	5.20701	5.49366
SS.CHR2.596	4.17521	4.13535	6.09035	13.7176	4.75824	4.33016	5.1921	4.5265	5.03863	5.94414
SS.CHR2.597	6.71345	11.1132	11.3079	14.2859	7.92518	10.3501	10.2758	10.3736	8.13335	9.63797
SS.CHR2.599	13.8234	14.9865	19.3206	10.7216	18.7057	16.8861	18.5057	14.3123	16.6553	19.4351
SS.CHR2.600	40.2033	43.6965	38.0149	38.0064	43.2237	46.0575	50.7732	41.6892	47.1382	41.369
SS.CHR2.602	0.775945	0.694332	0.250772	0	0.10448	0.049834	0.667747	0	0.749107	0.603662
SS.CHR2.603	3.88987	4.81864	3.79091	3.62417	4.00549	4.46032	3.93089	4.66111	4.4162	4.33695
SS.CHR2.605	0.454574	0.769843	1.00176	0.773753	0.939859	0.344236	0.438517	0.948971	0.662258	0.345
SS.CHR2.604	20.389	20.5525	17.4578	12.1439	28.4269	25.0475	21.4677	12.4334	17.54	17.1827
SS.CHR2.606	18.2564	19.6681	23.2033	23.6324	22.626	18.1799	19.2926	19.5586	25.3017	20.3913
SS.CHR2.601	17.7543	14.5813	14.6325	13.5811	14.8551	14.5235	12.4201	14.8711	15.1661	15.9283
SS.CHR2.607	7.24811	6.01599	6.18744	6.58477	7.31288	6.12728	4.88935	6.98391	6.0311	3.98845
SS.CHR2.609	0.111512	0	0.108638	0	0	0.106391	0.285767	0	0.2775	0.230404
SS.CHR2.608	22.6837	17.4285	29.2196	14.6937	14.9306	12.3242	17.2702	30.12	13.0326	18.5054
SS.CHR2.611	1.41432	5.49777	2.14356	3.55442	3.30972	5.85801	4.07668	5.94158	3.75493	7.58332
SS.CHR2.610	13.2817	11.3254	9.99206	12.0939	12.4991	10.5063	11.7608	12.0456	9.76593	12.5566
SS.CHR2.613	5.593	7.54168	6.85829	1.44233	5.16399	6.07636	5.18347	7.37728	4.36199	6.44787
SS.CHR2.614	29.7837	24.0828	17.4515	11.1863	19.6436	25.8115	21.0283	18.8881	17.8987	19.6338
SS.CHR2.617	0.092238	0.311075	0.168017	0.061492	0.182082	0	0	0	0.414507	0.158085
SS.CHR2.615	10.0245	5.66546	7.98417	7.36743	4.08314	7.56634	6.11345	6.88986	5.87613	6.92813
SS.CHR2.616	0.055094	0.155998	0	0	0	0.011241	0.009897	0	0	0.037928
SS.CHR2.619	6.88619	8.83146	18.7772	4.13614	6.64615	10.8278	3.97572	2.54998	7.34057	4.57595
SS.CHR2.622	0.750772	0.474726	0.421107	0.133471	0	0.471147	0.297221	0.672605	0	0.066399
SS.CHR2.620	0.305209	0.171084	0.888312	0.193179	0.591431	0.138215	0.178323	0.491753	0.945735	0.438234
SS.CHR2.621	2.06326	1.71698	1.46806	2.41565	2.32032	1.66708	1.05569	1.02451	4.21296	2.94896
SS.CHR2.618	173.746	129.327	178.994	236.396	199.732	139.036	120.485	133.466	260.111	239.581
SS.CHR2.625	0.142849	0.908664	0.909897	0.551169	0.604597	1.84466	1.17012	0.897655	0.32752	0.481806
SS.CHR2.624	5.98766	3.84088	7.15879	4.02739	4.60318	6.41514	4.24437	4.32803	5.50544	4.2633
SS.CHR2.627	0	0	1.5587	0.097211	0.035467	2.26622	0.090957	0.320533	0	0.386957
SS.CHR2.626	8.21602	17.7551	5.87435	22.0851	9.34508	9.83514	12.1505	3.88363	8.10314	11.3398
SS.CHR2.628	4.13558	3.79014	5.29531	3.9633	3.08004	4.87475	4.19838	5.36132	3.02671	3.11771
SS.CHR2.635	0.201377	0.178359	0.831615	0	0.249846	0	0.71728	0.090366	0.440032	0
SS.CHR2.633	6.19909	6.02044	5.4707	6.40381	6.74826	4.33114	7.21515	4.78819	6.38091	7.42844
SS.CHR2.634	35.7552	28.7898	25.8255	31.7874	27.496	30.7683	37.4697	32.1399	33.1819	27.2283
SS.CHR2.636	1.89374	0.874431	0.507447	0.887406	1.01745	0.965428	1.66335	1.91772	0.900281	1.06167
SS.CHR2.637	2.04733	2.18247	1.70658	2.0306	2.23709	1.60597	2.26618	5.11941	1.92125	2.04742
SS.CHR2.638	2.40962	0.718133	1.28501	1.13495	1.16315	0.698526	1.67628	2.80911	0.940725	0.529729
XLOC_067108	2616.44	1582.11	1917.02	1686.62	2198.85	1799.84	1424.47	2713.98	3121.66	3257.22
XLOC_067109	1795.53	1977.31	1480.75	806.789	1148.28	446.992	1066.43	633.889	972.252	602.773
SS.CHR2.642	0.010527	0.121879	0.063906	0.01023	0.005793	0	0.032956	0	0.056808	0.070735
SS.CHR2.640	211.759	346.43	255.603	275.958	318.213	343.89	272.159	231.506	259.716	81.5935
SS.CHR2.643	11.1654	9.26409	15.8465	6.67843	13.8821	11.1364	11.9544	8.85431	8.43549	7.22574
SS.CHR2.644	5.22895	7.95552	4.72665	7.19433	5.80398	5.37699	6.09944	5.56463	6.83469	6.47414
SS.CHR2.646	11.6767	7.09298	13.7133	19.148	11.2861	9.441	7.1846	27.9464	12.3963	10.3485
SS.CHR2.647	148.134	170.012	169.018	181.732	185.08	176.357	190.787	238.405	225.134	158.494
SS.CHR2.650	0.271731	0	0	0	0.643567	0.576462	0	0.223005	0.238715	0
SS.CHR2.651	55.9178	62.7208	63.7008	48.3674	57.3555	61.7377	70.1551	69.1332	129.931	67.596
SS.CHR2.652	1.66013	0.481572	0.906418	1.17524	0.970415	0.265256	1.18472	0.62855	1.52246	5.83052
XLOC_069737	6.31279	3.60367	7.19915	3.74246	4.53153	8.64921	7.0656	3.27788	4.17899	4.51267
SS.CHR2.653	5.07937	5.40299	4.92618	5.33671	3.57266	4.43952	4.73768	5.60848	5.81778	5.06267
SS.CHR2.655	4.96516	6.09951	11.8716	2.97044	3.36841	5.42255	1.46319	0.868446	7.07875	3.5963
SS.CHR2.657	0.390678	0.100674	0.01952	0.053	0.018007	0.112705	0.054488	0.063528	0.077227	0.083917
SS.CHR2.656	30.0128	39.7542	32.586	49.6885	48.0889	37.4883	45.3828	38.7839	47.2704	35.8352
SS.CHR2.658	10.2224	10.542	11.1563	13.4583	9.90895	12.4007	10.256	11.7457	9.70425	12.9873
SS.CHR2.659	15.1697	19.6813	35.8551	12.8016	29.6304	27.5524	15.4475	10.1852	18.6856	15.4883
SS.CHR2.660	2.69664	2.47763	2.17845	1.73366	1.69332	2.8557	1.47146	2.02981	2.15232	1.56542
SS.CHR2.661	2.68921	4.46075	2.63094	2.6854	1.9891	2.84957	2.64048	3.02365	1.77177	2.29652
SS.CHR2.662	31.0755	32.2301	24.8915	34.2049	29.3158	33.9188	29.2452	31.0544	28.4951	29.7932
SS.CHR2.663	9.82437	9.98369	10.4904	10.0133	7.46589	8.30815	9.44575	9.73004	9.94272	8.69417
SS.CHR2.664	6.57723	4.73345	5.46403	7.1392	6.49202	5.94691	6.21679	4.78355	6.63631	5.15746
SS.CHR2.667	0.648486	2.84981	0.818309	0.010652	0.328172	0.264051	0.839378	0.417062	0.466115	0.729083
SS.CHR2.669	0.484173	0.113846	0.89692	0.170017	0.512637	0.46008	0.708884	0.276912	0	0.191849
SS.CHR2.670	0.159236	0.231589	0.408355	0	0.256789	0.175018	0.072563	0.139788	0.139489	0.315682
SS.CHR2.666	22.2049	18.9626	18.0572	25.1357	18.8575	22.8817	21.8718	20.2099	20.4366	23.9617
SS.CHR2.672	7.22455	7.95163	6.73621	8.36634	5.6023	5.96108	6.44012	7.4878	7.21848	9.61387
SS.CHR2.671	44.8068	37.033	43.1973	48.347	43.039	41.5034	37.5527	48.5488	42.0484	44.8685
SS.CHR2.673_SS.CHR2.674	8.10901	6.86612	7.48458	7.31563	7.48431	8.00487	8.4815	8.93743	8.42301	7.37332
SS.CHR2.675	17.4701	14.2186	13.6433	13.1692	14.1265	14.8402	16.8826	17.675	13.1608	20.4011
SS.CHR2.676	0	0.10442	0	0	0.089954	0	0	0	0	0
SS.CHR2.677	49.3546	48.8879	46.6054	47.236	47.4191	44.1908	44.6481	65.6311	43.0611	46.9466
SS.CHR2.681	0.135848	0.084352	0.049121	0.222433	0.246954	0.247337	0.358297	0.197894	0.065107	0
SS.CHR2.682	2.28669	1.70318	3.8073	0.652576	1.71552	1.47772	0.695009	2.09416	0.917071	1.12426
SS.CHR2.678	11.2533	14.5311	9.05415	6.46681	4.97477	5.70123	13.8451	16.1088	12.7285	13.6487
SS.CHR2.679	3.61269	3.04969	2.76821	2.75802	3.65253	3.71757	2.91414	1.63044	3.7201	3.55178
SS.CHR2.680	1.26418	0.932364	0.924915	1.54902	1.82702	1.8884	1.18226	0.744761	1.43391	1.16657
XLOC_069772	2.49457	0.931233	6.92686	7.48379	5.26365	2.84836	6.02928	0.449254	2.86521	0.297114
SS.CHR2.683	7.77407	7.66032	7.78533	7.09062	7.39288	6.76111	7.30593	5.293	7.96139	8.32531
SS.CHR2.689	11.6104	19.1634	15.7406	16.0541	11.2447	13.5279	11.4889	14.2968	13.9052	14.8304
SS.CHR2.691	4.60468	2.09836	3.8068	4.98581	2.8527	2.77291	3.88759	3.0613	1.74916	2.95038
SS.CHR2.692	2.05579	2.84	1.24347	5.18384	4.68783	1.42755	2.65795	1.77631	2.12215	1.95932
SS.CHR2.688	71.4923	89.4549	68.5047	91.857	89.2894	68.7756	81.8278	78.9949	77.9168	76.3401
SS.CHR2.694	1.03105	0.266658	0.225315	0.863022	0.114775	0.619369	0.175682	2.27728	1.16914	0.454912
SS.CHR2.693	19.255	19.5002	17.6547	26.9528	11.1507	20.3421	25.5358	20.2098	24.3653	32.1293
SS.CHR2.696	10.8809	40.7521	28.7687	6.56267	13.0853	22.1621	5.8602	5.19272	18.4908	5.52491
XLOC_067207	10.4605	5.26451	10.9441	8.71064	6.72322	11.2239	5.43992	7.98183	8.06018	9.03663
SS.CHR2.697	1.48853	1.59951	1.76551	2.5373	2.12521	1.14594	1.38897	2.09075	2.12852	1.28539
SS.CHR2.698	1.21292	0.79605	0.466904	0.89053	0.983518	0.768755	0.677318	0.755674	0.827079	1.15996
SS.CHR2.699	0.013744	0.128378	0	0.02786	0.058302	0.029164	0.085903	0.098433	0.146834	0.028286
SS.CHR2.700	18.2262	46.2832	34.3788	43.5815	39.6019	40.5572	41.1804	36.4269	46.7681	34.1317
SS.CHR2.702	6.62594	7.53971	7.78873	4.37439	4.94343	6.76933	6.86435	10.7324	5.39869	5.14171
SS.CHR2.703	3.42773	2.08036	2.17345	1.33686	0.787572	1.95474	1.90991	1.03175	2.34478	0.995415
SS.CHR2.706	0.204184	0.093923	0.117492	0.33111	0.11212	0.333334	0.475298	0.016839	0.264732	0
SS.CHR2.705	2.60986	0.928302	2.16072	1.61669	1.69184	1.36056	2.63786	2.51024	1.86766	2.5731
SS.CHR2.704	13.2176	14.9473	13.3571	17.2893	16.3612	14.6634	13.0627	15.6958	13.1789	13.6771
SS.CHR2.708	2.68136	3.66418	2.69605	0.013855	2.21876	1.90213	1.94458	2.16009	4.87804	3.26143
SS.CHR2.711	8.52678	3.09873	8.82911	7.92677	2.47986	5.64863	5.64792	2.7547	6.08075	15.592
SS.CHR2.712	2.05009	1.63548	1.92773	2.31621	2.08884	1.91523	2.42402	2.58457	3.23533	1.75144
SS.CHR2.709	0.268499	0.3286	0.489062	0.52146	0.350492	0.45823	0.942244	0.63872	0.360012	0.578529
SS.CHR2.710	433.835	426.142	524.096	301.375	506.407	486.23	376.085	436.105	376.197	486.433
SS.CHR2.714	17.5492	27.6396	14.9647	17.5471	24.7015	25.4716	11.2417	13.0942	13.771	12.0333
SS.CHR2.713	29.8316	33.6094	27.4	27.6033	26.6324	35.7619	27.987	26.7675	27.1921	21.3955
SS.CHR2.715	37.8953	38.9389	44.4759	37.3823	60.6232	38.8353	50.4309	26.2777	44.045	56.2079
SS.CHR2.716	6.67116	5.89234	5.6131	3.729	5.42138	8.81419	9.89674	11.0737	7.02154	6.42708
SS.CHR2.717	0.036414	0.025305	0.057324	0	0.049241	0.071337	0.136204	0.037607	0	0
SS.CHR2.721	2.7379	2.35476	2.37126	2.90265	1.91951	1.23489	2.48258	1.93034	3.30179	3.45105
SS.CHR2.722	0.226099	0	0	0.03661	0	0.052376	0	0	0	0
SS.CHR2.719	8.99159	7.82099	8.2707	7.72105	6.76223	7.84295	7.40602	9.77567	4.92967	5.98055
SS.CHR2.720	10.5422	8.85906	8.61199	9.43312	7.12731	8.76094	6.41885	8.0334	12.1816	7.18831
SS.CHR2.723	6.46406	5.99317	4.57603	6.27521	7.16499	5.69837	6.22834	5.20427	5.40599	4.40192
SS.CHR2.724	5.32228	3.73326	3.91259	3.53081	3.93954	4.50273	2.51662	2.69648	3.5631	2.13277
SS.CHR2.725	1.23411	1.788	1.32727	1.0607	1.65216	1.09303	0.872213	0.902589	1.03293	0.913397
SS.CHR2.727	0	0	0.268988	0	0.170774	0.221851	0	0.670211	0.295372	0.052054
XLOC_069821	0.40563	0.240011	0	0.145604	0.237893	0.226368	0.386068	0.097899	0.064996	0.325096
SS.CHR2.729	4.80834	7.04411	6.33553	3.79358	8.22087	6.14841	7.90831	15.592	4.49728	10.7038
SS.CHR2.726	24.1147	20.0461	21.0333	19.0819	20.1448	21.8078	19.0438	21.2167	19.0608	18.2072
SS.CHR2.730	7.51117	5.07885	5.54057	6.60971	6.25115	4.46686	5.55789	7.49309	6.46889	5.63487
SS.CHR2.733	0	0.118576	0	0.167101	0	0.155337	0	0	0	0
XLOC_069835	0.844982	0.227362	0.745921	0.631387	0.213099	0.51945	0.46621	1.0218	1.80653	0.269051
SS.CHR2.731	0.75568	0.240057	0.783317	0.453244	0.668937	0.584868	0.650034	0.590915	0.288427	0.282365
SS.CHR2.732	8.50685	8.07185	6.63787	10.6389	8.53376	6.51011	6.30599	7.46657	10.7774	8.38853
XLOC_069827	3.37163	4.21491	48.3446	14.2543	71.7432	4.00897	6.45683	3.7386	5.26447	8.15226
SS.CHR2.734	28.222	27.223	25.4555	16.3189	26.1658	24.1483	25.9883	22.8009	24.337	22.657
SS.CHR2.737	0.146647	0.631339	0.196147	0.182971	0.113017	0.250564	0.466009	0.128362	0.138428	0.160224
SS.CHR2.735	31.4378	27.1381	25.961	19.0771	40.5482	38.7595	35.6735	49.5213	15.1795	15.035
SS.CHR2.739	3.35925	0.311335	0.775685	1.0232	0.57704	1.28305	1.41101	4.72633	0.868667	1.65988
SS.CHR2.740	0.235781	0.112234	0.175333	0.12354	0.555722	0.236011	0.109309	0.152472	0.096317	0.060626
SS.CHR2.741	4.86278	2.56324	2.77106	1.49011	2.59504	3.15166	3.59859	1.27119	3.22847	4.82585
SS.CHR2.742	0.457229	0.07925	0.099176	0.144322	0.295347	0.42868	0.238895	0.16435	6.19577	0.793137
SS.CHR2.743	0.218873	0.257634	0.275014	0.152521	0	0.065509	0.219625	0.065433	0.397539	0.264137
SS.CHR2.744	0.182018	0	0	0.044733	0.095817	0	0	0.239215	0.082692	0.101822
SS.CHR2.745	19.9274	22.4051	23.5894	29.5948	26.0471	26.2283	17.871	28.9366	18.7797	31.639
SS.CHR2.747	0.462256	0	0	0	0.225745	0	0.035794	0	0.091445	0
SS.CHR2.750	0.484981	0.220745	0.224959	0.11673	0	0.066206	0.059987	1.21752	0	0
SS.CHR2.746	14.4742	13.2983	15.0847	10.1331	15.2311	16.0638	14.1291	15.2128	11.4998	13.9876
SS.CHR2.753	0.459139	0	0.027809	0	0	0	0.286912	0.224165	0	0
SS.CHR2.752	0.986514	1.30157	1.34802	1.73163	1.48359	1.73523	2.09477	1.11215	1.35156	1.46883
SS.CHR2.751	12.3241	18.0339	14.0075	16.6535	15.2168	12.2101	14.4563	23.5066	11.3981	17.2538
SS.CHR2.754	18.7326	14.0436	7.00438	28.6216	12.0562	13.246	20.8719	23.5496	10.9003	7.68267
SS.CHR2.755	11.9424	16.581	13.8649	25.7069	18.5573	17.5294	21.222	16.2796	17.9525	13.5826
SS.CHR2.756	6.07526	2.88556	4.52975	3.10903	4.12337	4.27011	5.32348	4.51215	4.13851	3.87489
SS.CHR2.758	0.259944	0	0	0	0.060577	0	0	0	0	0.037343
SS.CHR2.757	13.0727	15.8457	8.64957	10.6344	9.1392	10.3771	10.3254	12.3362	8.11056	14.526
SS.CHR2.761	0.704748	0.844993	0.895007	0.40695	0.452872	0.636238	0.417899	1.00982	0.241016	0.259592
SS.CHR2.762	0.587087	0.531983	1.26307	0.564025	2.69465	0.99724	1.654	1.81769	0.571535	0.678478
SS.CHR2.759	22.2776	22.4323	22.6865	25.5707	21.0095	23.4351	18.772	25.261	23.8337	20.0586
SS.CHR2.760	20.9116	17.9933	21.8106	24.8102	20.131	20.2649	17.0286	25.4841	20.9106	19.4367
SS.CHR2.763	7.12245	4.64196	6.12455	2.6944	4.88085	5.27271	5.05817	7.76786	5.0144	7.15012
SS.CHR2.766	0.222674	0.550867	0.394209	0.240247	0.242022	0.28472	0.059261	0.299893	0.426471	0.314243
SS.CHR2.765	0	0	0	0	0	0	0	0	0	0
SS.CHR2.767	0	0	0.157712	0	0	0	0.291289	0.126226	0.184024	0
SS.CHR2.768	1.86307	1.11851	2.65795	1.7932	1.5561	1.86308	2.61081	2.02017	2.19379	1.75835
SS.CHR2.769	6.50691	4.75038	3.73704	3.60726	8.1626	2.73635	5.13635	23.7096	4.03022	10.0869
SS.CHR2.770	0	0.141125	0	0	0	0	0	0	0	0
SS.CHR2.771	10.3334	9.30615	7.96095	8.9171	8.87472	9.61249	9.49576	9.85003	9.66369	9.95785
SS.CHR2.772	23.7815	33.9804	30.1264	18.3598	37.6206	31.7217	21.5851	25.6684	29.395	24.1329
SS.CHR2.773	51.5111	23.5534	24.3981	20.9676	21.4301	38.2657	38.1549	40.9285	35.5264	27.6088
SS.CHR2.774	14.9219	7.6421	8.46828	9.41461	7.88793	10.8143	11.3605	15.8205	7.1538	9.4688
SS.CHR2.776	0.822131	0.925326	2.37238	0.415355	0.254546	0.6892	0.292502	0.473135	0.605354	0.28894
SS.CHR2.775	40.3436	37.5729	38.1046	48.1193	35.5786	37.6651	39.8003	28.975	35.4694	37.8157
SS.CHR2.782	0	0	0	0	0	0	0.078022	0	0.188002	0
SS.CHR2.786	0.701984	0.279061	0.460933	0.441747	0.375961	0.593556	0.33837	0.323567	0.448466	0.57162
SS.CHR2.779	3.09832	0	4.98093	2.0422	2.20725	0.028245	1.1162	7.45113	0	0
SS.CHR2.780	0	0	0	0	0	0	0	0	0	0
SS.CHR2.781	0.817415	0	0	0.863006	0	0.03641	0	0	0	0.063142
SS.CHR2.787	124.594	164.617	131.841	140.774	147.874	146.099	125.857	142.092	137.491	161.435
SS.CHR2.789	14.1377	7.35665	23.2473	9.62039	12.4225	10.1257	12.0818	10.0294	19.1611	11.5184
SS.CHR2.788	41.0618	47.5019	46.6968	49.996	38.0199	39.3519	49.8829	71.8695	71.8452	40.4601
SS.CHR2.792	1.69918	0.734102	1.25525	0.697566	1.04772	1.48769	1.50099	1.12339	0.959612	0.331928
SS.CHR2.790_SS.CHR2.791	21.8505	16.8655	16.133	15.3921	18.7142	19.0661	15.7994	15.6868	20.1315	11.6538
SS.CHR2.794	6.48567	4.86995	4.86607	6.40269	4.76546	5.49311	6.69551	6.58911	4.93558	6.10053
SS.CHR2.793	30.2489	40.4413	30.703	26.6612	39.4627	33.2951	33.8784	23.4323	48.432	45.9411
SS.CHR2.797	0.03578	0	0.03937	0	0	0.081454	0.030002	0.032193	0	0
SS.CHR2.796	0.640764	0.579822	0.379757	0.322435	0.49611	0.515964	1.10656	0.336522	0.540984	0.134542
SS.CHR2.799	8.62563	3.84498	3.41246	27.5746	3.35821	25.4665	13.6223	7.89388	31.9196	9.4507
SS.CHR2.801	0.266057	0.144804	0.928208	1.01927	0.155314	0.356095	0.314276	0.206225	1.9219	0.446221
SS.CHR2.795	12.4	12.2204	11.0658	11.8498	14.7322	11.8861	13.2586	13.4278	12.8387	11.2975
SS.CHR2.802	0.823364	0.926729	3.14624	0.941188	0.507146	0.606209	0.663873	1.09626	1.13393	1.0785
SS.CHR2.803	0.396556	0.078708	0.222714	0.950506	0.271152	0.17801	0.046576	0.305114	0.699568	0.639781
SS.CHR2.804	0.531989	0.672504	0.253782	0.737954	0.751461	0.561874	0.307744	0.555655	0.169567	0.389145
SS.CHR2.806	0.390506	0.219184	0.481866	0.468655	0.490983	0.05503	0.392685	0.637859	0.534221	0.776609
SS.CHR2.805	21.9131	24.7789	25.5383	17.9005	18.5555	22.9094	22.0662	27.3492	25.5054	19.7956
XLOC_069904	6.9636	4.71253	4.79208	2.70309	4.17232	6.39146	6.32149	7.01801	4.79082	6.80169
SS.CHR2.807	26.9638	13.9713	11.0319	25.5418	5.99318	23.7643	17.7975	26.5421	31.6944	20.757
SS.CHR2.808	7.71652	6.02266	6.3461	7.0401	9.77276	6.03907	6.76009	5.62349	6.07985	9.10122
SS.CHR2.809	0.784234	1.06199	0.645996	0.792285	0.667214	0.92573	1.13481	2.00007	0.801536	0.501634
SS.CHR2.810	10.0972	7.46589	6.00876	9.14198	7.38444	8.35141	8.87418	7.81739	9.10072	7.44705
SS.CHR2.811	2.61555	1.74049	2.44958	2.32667	1.90637	0.805352	1.50493	0.321132	0.800131	0.558813
SS.CHR2.813	0.514581	0.21288	0.205124	0.466904	0.027136	0.278425	0.019981	0.296097	2.39296	0.394431
SS.CHR2.812	7.14147	5.95666	5.8737	5.49038	5.10941	7.15632	6.37949	7.41655	7.03889	2.93783
SS.CHR2.814	2.98244	1.89786	2.48993	2.39848	3.42501	3.72648	2.94044	1.55386	1.6001	1.86823
SS.CHR2.815	44.9891	64.046	48.6606	65.1116	53.0982	42.3205	52.7917	60.3535	63.5628	78.5009
SS.CHR2.816	3.33029	3.56304	3.39015	3.44458	2.97919	3.20934	3.35316	3.75891	3.35265	3.57662
SS.CHR2.817	89.7816	102.371	83.3285	100.612	76.248	94.6263	93.9263	102.708	108.516	110.644
SS.CHR2.820	0.135359	0.12082	0.059228	0.362222	0.219825	0	0.055648	0.963112	1.71907	0.19093
SS.CHR2.821	0.046366	0.002366	0.012918	0.044306	0.008465	0.030917	0.135812	0	0.005016	0.033786
SS.CHR2.822	3.11381	0.284691	0.835371	1.31817	1.81509	0.486986	1.87346	1.94797	0.34188	0.886987
SS.CHR2.818	1.72952	1.25369	1.64187	3.2373	1.80983	2.23966	1.69891	2.23669	2.56705	1.04516
SS.CHR2.819	4.26133	3.55904	3.50138	4.84185	3.1644	3.66471	3.74286	4.72499	3.60966	2.9301
SS.CHR2.823	6.52215	5.04837	5.89088	5.49048	5.76577	4.55443	6.18264	4.93424	7.32114	6.92938
XLOC_069923	1.96059	0.744256	0.716748	0.996861	0.184991	0.025798	0.358401	2.15916	1.37501	0.328116
SS.CHR2.824	44.4509	20.6372	23.883	31.9812	24.4398	21.4772	23.8269	48.3956	34.9367	27.4254
SS.CHR2.827	0.037329	0	0	0.089277	0.044287	0	0.163564	0	0	0.207745
SS.CHR2.826	5.95796	4.60262	4.25357	3.8431	3.54098	3.99233	3.22414	6.10844	4.54079	4.69707
SS.CHR2.828	17.3738	20.8969	18.6547	22.0876	14.1166	14.4113	19.871	21.9549	17.0539	17.5804
SS.CHR2.829	3.40614	1.75988	3.47839	3.55095	3.46548	2.20113	3.19253	2.4137	3.342	2.25739
SS.CHR2.830	3.56429	1.69917	7.21661	5.08183	4.29165	7.11476	5.73935	5.80842	3.10226	3.08142
SS.CHR2.831	3.60856	5.53957	3.79014	4.43361	3.89917	7.57319	4.18765	4.61638	2.89061	7.31803
SS.CHR2.832	23.7547	21.0108	24.8337	30.3823	23.2628	22.5267	25.1467	29.719	27.9301	24.5193
SS.CHR2.837	0.381056	0	0	0	0	0	0	0	0	0
SS.CHR2.835	0.558643	0.423003	1.23425	0.318767	0.532326	1.37005	0.524767	0.12698	0.310255	0.084324
SS.CHR2.833	9.10997	8.43084	10.5065	18.3688	8.52416	9.41835	11.5635	8.06784	11.0256	13.4466
SS.CHR2.838	0.245705	0.113281	0.175023	0.191184	0.147266	0.538593	0.455228	0.37246	0.442812	0
SS.CHR2.839	1.0353	0.462348	0.635968	0.471349	0.814544	0.379462	1.02002	0.91754	0.519311	0.617402
SS.CHR2.840	19.0074	14.8265	15.8196	19.9258	15.8717	13.0505	16.8747	14.1712	15.0551	9.78199
SS.CHR2.841	58.3569	65.3861	60.2333	72.4696	49.1745	57.4584	53.6858	67.1443	121.731	62.015
SS.CHR2.842	20.7638	17.4567	15.5232	14.4559	17.1058	18.1893	13.2805	17.2767	18.3	16.0233
SS.CHR2.844	0	0	0	0	0	0.155238	0	0	0	0
SS.CHR2.843	5.61758	3.3923	6.64678	4.8781	4.60729	4.13657	6.10688	7.13947	4.69879	4.5363
XLOC_069949	16.1307	8.98927	15.1389	10.2281	13.7834	17.0648	12.9325	12.9027	18.0418	9.75442
SS.CHR2.845	3.73774	3.76921	2.61279	5.11193	4.15832	3.01018	5.86206	3.23696	6.21033	1.9757
SS.CHR2.846	0	0	0	0	0	0	0	0	0	0.029118
SS.CHR2.849	1.23366	2.88805	1.10595	3.49874	1.1807	1.68334	2.08256	3.00651	3.39699	2.91556
SS.CHR2.848	13.7246	15.738	13.9632	12.9099	12.6497	13.8161	13.8364	15.6108	13.2537	14.7562
XLOC_069962	8.0789	5.86735	8.96164	12.3388	3.22928	4.20333	8.56562	14.4421	12.6779	7.90928
SS.CHR2.853	0.821964	1.33183	1.62397	0.984049	1.11964	1.33232	1.40624	1.07505	0.809762	1.55834
XLOC_069964	2.67332	1.22577	2.33905	1.7419	0.916211	1.24477	1.50086	5.67761	2.37663	4.20594
SS.CHR2.851	0.534759	0.426425	1.13105	1.31967	1.25624	1.43398	1.54381	1.13791	2.39195	1.81133
SS.CHR2.852	0.043039	0.257104	0.302855	0.241623	0.008963	0.039057	0.163034	0.494722	0.340805	0.264668
SS.CHR2.857	0.046893	0.152897	0.02582	0.116686	0.047637	0.108355	0	0.79816	0.14604	1.18777
SS.CHR2.854	0.779117	0.5689	0.43716	0.089456	0.5195	0.28807	0.748245	0.365244	0.494579	0.232977
SS.CHR2.855	0.280986	0.234743	0.215137	0.581823	0.069456	0.156417	0.08147	0.424962	0.064625	0.164667
SS.CHR2.856	1.90007	1.49246	2.53036	1.14639	1.67449	0.646515	1.8768	1.91627	1.61206	1.52681
SS.CHR2.859	1.2757	1.41868	0.918751	1.68876	1.04505	1.2612	1.32889	1.24511	1.37322	1.23586
[truncated: 30,713 more rows]

[truncated: 3 more sheets: Table S11, Table S12, Table S13]
